# Supplementary material
Source: publisher figshare collection journal article supplement (https://acs.figshare.com/ndownloader/files/5910771)
Supplement: Supplementary file 1 [file 5910771]

 
data_final4

# start Validation Reply Form
_vrf_PLAT214_final4
;
PROBLEM: (Anion/solvent) ADP max/min ratio ....       5.6 prolat 
RESPONSE: F7 and F11 are part of a BF4- anion
that is disordered over more than two positions.
Further splitting may be possible, but would
not significantly increase the refinement quality. 
;
# end Validation Reply Form
 
_audit_creation_method            SHELXL-2013
_chemical_name_systematic
;
 ?
;
_chemical_name_common             '[Fe(MeCN)2(1b)](BF4)2 (8b)'
_chemical_melting_point           ?
_chemical_formula_moiety          'C39 H46 Fe N4 P2, 2(B F4)'
_chemical_formula_sum             'C39 H46 B2 F8 Fe N4 P2' 
_chemical_formula_weight          862.21

loop_
 _atom_type_symbol
 _atom_type_description
 _atom_type_scat_dispersion_real
 _atom_type_scat_dispersion_imag
 _atom_type_scat_source
 'C' 'C'  0.0033 0.0016 'International Tables Vol C Tables 4.2.6.8 and 6.1.1.4'
 'H' 'H'  0.0000 0.0000 'International Tables Vol C Tables 4.2.6.8 and 6.1.1.4'
 'B' 'B'  0.0013 0.0007 'International Tables Vol C Tables 4.2.6.8 and 6.1.1.4'
 'F' 'F'  0.0171 0.0103 'International Tables Vol C Tables 4.2.6.8 and 6.1.1.4'
 'Fe' 'Fe' 0.3463 0.8444 'International Tables Vol C Tables 4.2.6.8 and 6.1.1.4'
 'N' 'N'  0.0061 0.0033 'International Tables Vol C Tables 4.2.6.8 and 6.1.1.4'
 'P' 'P'  0.1023 0.0942 'International Tables Vol C Tables 4.2.6.8 and 6.1.1.4'
 
_space_group_crystal_system       monoclinic
_space_group_IT_number            4
_space_group_name_H-M_alt         'P 21'
_space_group_name_Hall            'P 2yb'
 
_shelx_space_group_comment
;
The symmetry employed for this shelxl refinement is uniquely defined
by the following loop, which should always be used as a source of
symmetry information in preference to the above space-group names.
They are only intended as comments.
;
 
loop_
 _space_group_symop_operation_xyz
 'x, y, z'
 '-x, y+1/2, -z'
 
_cell_length_a                    10.9646(6)
_cell_length_b                    16.3287(9)
_cell_length_c                    11.9006(7)
_cell_angle_alpha                 90
_cell_angle_beta                  110.493(2)
_cell_angle_gamma                 90
_cell_volume                      1995.8(2)
_cell_formula_units_Z             2
_cell_measurement_temperature     102(2)
_cell_measurement_reflns_used     9888
_cell_measurement_theta_min       2.49
_cell_measurement_theta_max       30.40
 
_exptl_crystal_description        'block'
_exptl_crystal_colour             'red'
_exptl_crystal_density_meas       'not measured' 
_exptl_crystal_density_diffrn     1.435          
_exptl_crystal_F_000              892
_exptl_transmission_factor_min    ?                                             
_exptl_transmission_factor_max    ?                                             
_exptl_crystal_size_max           0.480
_exptl_crystal_size_mid           0.380
_exptl_crystal_size_min           0.180
_exptl_absorpt_coefficient_mu     0.530
_exptl_absorpt_correction_type    multi-scan
_exptl_absorpt_correction_T_min   0.8557
_exptl_absorpt_correction_T_max   0.9918
_exptl_absorpt_process_details
;
SADABS-2014/4 (Bruker,2014/4) was used for absorption correction.
wR2(int) was 0.1123 before and 0.0729 after correction.
The Ratio of minimum to maximum transmission is 0.8628.
The \l/2 correction factor is 0.00150.
;
_diffrn_ambient_temperature       102(2)
_diffrn_radiation_wavelength      0.71073
_diffrn_radiation_type            MoK\a
_diffrn_source                    'sealed X-ray tube'
_diffrn_radiation_monochromator   graphite
_diffrn_measurement_device        'fixed chi three-circle diffractometer'
_diffrn_measurement_device_type   'Bruker SMART Apex2'
_diffrn_measurement_method        '\w scans'
_diffrn_detector                  'Bruker SMART CCD 1K area detector'
_diffrn_detector_area_resol_mean  7.9
_diffrn_standards_number          0
_diffrn_reflns_number             47933
_diffrn_reflns_av_unetI/netI      0.0704
_diffrn_reflns_av_R_equivalents   0.0600
_diffrn_reflns_limit_h_min        -15
_diffrn_reflns_limit_h_max        14
_diffrn_reflns_limit_k_min        -23
_diffrn_reflns_limit_k_max        23
_diffrn_reflns_limit_l_min        -16
_diffrn_reflns_limit_l_max        17
_diffrn_reflns_theta_min          2.343
_diffrn_reflns_theta_max          30.584
_diffrn_reflns_theta_full         25.242
_diffrn_measured_fraction_theta_max   0.997
_diffrn_measured_fraction_theta_full  0.999
_diffrn_reflns_Laue_measured_fraction_max    0.997
_diffrn_reflns_Laue_measured_fraction_full   0.999
_diffrn_reflns_point_group_measured_fraction_max   0.995
_diffrn_reflns_point_group_measured_fraction_full  0.997

_reflns_number_total              12196
_reflns_number_gt                 10000
_reflns_threshold_expression      'I > 2\s(I)'
_reflns_Friedel_coverage          0.933
_reflns_Friedel_fraction_max      0.993
_reflns_Friedel_fraction_full     0.995
_reflns_special_details
;
 Reflections were merged by SHELXL according to the crystal
 class for the calculation of statistics and refinement.
 
 _reflns_Friedel_fraction is defined as the number of unique
 Friedel pairs measured divided by the number that would be
 possible theoretically, ignoring centric projections and
 systematic absences.
;
 
_computing_data_collection        'Bruker SAINT'
_computing_cell_refinement        'Bruker SAINT'
_computing_data_reduction         'Bruker SAINT'
_computing_structure_solution     'SHELXL-2013 (Sheldrick, 2013)'
_computing_structure_refinement   'SHELXL-2013 (Sheldrick, 2013)'
_computing_molecular_graphics     'SHELXL-2013 (Sheldrick, 2013)'
_computing_publication_material   'SHELXL-2013 (Sheldrick, 2013)'
 
_refine_special_details
;
 ?**
;
_refine_ls_structure_factor_coef  Fsqd
_refine_ls_matrix_type            full
_refine_ls_weighting_scheme       calc
_refine_ls_weighting_details
'w=1/[\s^2^(Fo^2^)+(0.0565P)^2^+1.8293P] where P=(Fo^2^+2Fc^2^)/3'
_atom_sites_solution_primary      ?
_atom_sites_solution_secondary    ?
_atom_sites_solution_hydrogens    mixed
_refine_ls_hydrogen_treatment     mixed
_refine_ls_extinction_method      none
_refine_ls_extinction_coef        .
_refine_ls_abs_structure_details
;
 Flack x determined using 4106 quotients [(I+)-(I-)]/[(I+)+(I-)]
 (Parsons and Flack (2004), Acta Cryst. A60, s61).
;
_refine_ls_abs_structure_Flack    0.007(6)
_chemical_absolute_configuration  rmad
_refine_ls_number_reflns          12196
_refine_ls_number_parameters      538
_refine_ls_number_restraints      1
_refine_ls_R_factor_all           0.0743
_refine_ls_R_factor_gt            0.0527
_refine_ls_wR_factor_ref          0.1272
_refine_ls_wR_factor_gt           0.1166
_refine_ls_goodness_of_fit_ref    1.022
_refine_ls_restrained_S_all       1.022
_refine_ls_shift/su_max           0.000
_refine_ls_shift/su_mean          0.000
 
loop_
 _atom_site_label
 _atom_site_type_symbol
 _atom_site_fract_x
 _atom_site_fract_y
 _atom_site_fract_z
 _atom_site_U_iso_or_equiv
 _atom_site_adp_type
 _atom_site_occupancy
 _atom_site_site_symmetry_order  
 _atom_site_calc_flag
 _atom_site_refinement_flags_posn
 _atom_site_refinement_flags_adp
 _atom_site_refinement_flags_occupancy
 _atom_site_disorder_assembly
 _atom_site_disorder_group
Fe1 Fe 0.76230(5) -0.05270(3) 0.49692(4) 0.01191(12) Uani 1 1 d . . . . .
P1 P 0.85250(11) 0.06175(6) 0.58955(9) 0.0157(2) Uani 1 1 d . . . . .
P2 P 0.83406(9) -0.03211(6) 0.34645(8) 0.0119(2) Uani 1 1 d . . . . .
N1 N 0.5868(3) 0.0003(2) 0.4085(3) 0.0168(7) Uani 1 1 d . . . . .
H1 H 0.594(5) 0.023(3) 0.345(5) 0.020 Uiso 1 1 d . U . . .
N2 N 0.6714(4) -0.1585(2) 0.4185(3) 0.0165(7) Uani 1 1 d . . . . .
H2 H 0.654(5) -0.181(3) 0.464(5) 0.020 Uiso 1 1 d . U . . .
N3 N 0.7049(3) -0.0789(2) 0.6331(3) 0.0169(7) Uani 1 1 d . . . . .
N4 N 0.9213(3) -0.1089(2) 0.5882(3) 0.0156(7) Uani 1 1 d . . . . .
C1 C 0.5480(4) 0.0670(3) 0.4753(4) 0.0242(9) Uani 1 1 d . . . . .
H1A H 0.5659 0.0493 0.5592 0.029 Uiso 1 1 calc R U . . .
H1B H 0.4532 0.0769 0.4380 0.029 Uiso 1 1 calc R U . . .
C2 C 0.6202(5) 0.1459(3) 0.4755(4) 0.0237(9) Uani 1 1 d . . . . .
C3 C 0.5501(6) 0.2152(3) 0.4197(5) 0.0314(11) Uani 1 1 d . . . . .
H3 H 0.4587 0.2112 0.3794 0.038 Uiso 1 1 calc R U . . .
C4 C 0.6118(6) 0.2897(3) 0.4223(5) 0.0377(13) Uani 1 1 d . . . . .
H4 H 0.5625 0.3358 0.3825 0.045 Uiso 1 1 calc R U . . .
C5 C 0.7447(6) 0.2977(3) 0.4822(5) 0.0352(12) Uani 1 1 d . . . . .
H5 H 0.7862 0.3492 0.4858 0.042 Uiso 1 1 calc R U . . .
C6 C 0.8162(6) 0.2295(3) 0.5368(5) 0.0286(10) Uani 1 1 d . . . . .
H6 H 0.9074 0.2344 0.5777 0.034 Uiso 1 1 calc R U . . .
C7 C 0.7554(5) 0.1530(3) 0.5325(4) 0.0201(8) Uani 1 1 d . . . . .
C8 C 0.8834(5) 0.0679(3) 0.7511(4) 0.0246(9) Uani 1 1 d . . . . .
C9 C 0.7871(6) 0.0981(3) 0.7913(5) 0.0364(12) Uani 1 1 d . . . . .
H9 H 0.7067 0.1163 0.7348 0.044 Uiso 1 1 calc R U . . .
C10 C 0.8074(8) 0.1020(4) 0.9133(5) 0.0520(19) Uani 1 1 d . . . . .
H10 H 0.7404 0.1219 0.9394 0.062 Uiso 1 1 calc R U . . .
C11 C 0.9234(8) 0.0772(4) 0.9959(5) 0.057(2) Uani 1 1 d . . . . .
H11 H 0.9381 0.0814 1.0792 0.069 Uiso 1 1 calc R U . . .
C12 C 1.0189(7) 0.0460(4) 0.9571(5) 0.0504(18) Uani 1 1 d . . . . .
H12 H 1.0988 0.0279 1.0146 0.061 Uiso 1 1 calc R U . . .
C13 C 1.0003(6) 0.0407(3) 0.8349(4) 0.0350(12) Uani 1 1 d . . . . .
H13 H 1.0665 0.0187 0.8094 0.042 Uiso 1 1 calc R U . . .
C14 C 1.0128(4) 0.0845(3) 0.5828(4) 0.0200(8) Uani 1 1 d . . . . .
H14A H 1.0451 0.1357 0.6281 0.024 Uiso 1 1 calc R U . . .
H14B H 1.0731 0.0400 0.6243 0.024 Uiso 1 1 calc R U . . .
C15 C 1.0188(4) 0.0942(3) 0.4575(4) 0.0202(8) Uani 1 1 d . . . . .
H15A H 1.1056 0.1158 0.4649 0.024 Uiso 1 1 calc R U . . .
H15B H 0.9533 0.1354 0.4132 0.024 Uiso 1 1 calc R U . . .
C16 C 0.9945(4) 0.0153(3) 0.3842(4) 0.0194(8) Uani 1 1 d . . . . .
H16A H 1.0607 -0.0253 0.4291 0.023 Uiso 1 1 calc R U . . .
H16B H 1.0095 0.0269 0.3084 0.023 Uiso 1 1 calc R U . . .
C17 C 0.7233(4) 0.0272(2) 0.2193(3) 0.0151(8) Uani 1 1 d . . . . .
C18 C 0.7056(4) 0.1112(3) 0.2310(4) 0.0200(8) Uani 1 1 d . . . . .
H18 H 0.7588 0.1390 0.3011 0.024 Uiso 1 1 calc R U . . .
C19 C 0.6117(5) 0.1542(3) 0.1416(4) 0.0278(10) Uani 1 1 d . . . . .
H19 H 0.6021 0.2115 0.1500 0.033 Uiso 1 1 calc R U . . .
C20 C 0.5313(5) 0.1139(3) 0.0398(4) 0.0316(11) Uani 1 1 d . . . . .
H20 H 0.4649 0.1431 -0.0202 0.038 Uiso 1 1 calc R U . . .
C21 C 0.5481(5) 0.0312(3) 0.0260(4) 0.0260(10) Uani 1 1 d . . . . .
H21 H 0.4944 0.0037 -0.0443 0.031 Uiso 1 1 calc R U . . .
C22 C 0.6432(4) -0.0119(3) 0.1143(4) 0.0192(8) Uani 1 1 d . . . . .
H22 H 0.6543 -0.0687 0.1037 0.023 Uiso 1 1 calc R U . . .
C23 C 0.8521(4) -0.1255(3) 0.2693(3) 0.0172(8) Uani 1 1 d . . . . .
C24 C 0.9123(5) -0.1193(3) 0.1837(4) 0.0232(9) Uani 1 1 d . . . . .
H24 H 0.9509 -0.0687 0.1748 0.028 Uiso 1 1 calc R U . . .
C25 C 0.9173(5) -0.1850(3) 0.1112(4) 0.0284(11) Uani 1 1 d . . . . .
H25 H 0.9620 -0.1803 0.0560 0.034 Uiso 1 1 calc R U . . .
C26 C 0.8564(5) -0.2570(3) 0.1207(4) 0.0323(12) Uani 1 1 d . . . . .
H26 H 0.8547 -0.3013 0.0685 0.039 Uiso 1 1 calc R U . . .
C27 C 0.7970(5) -0.2656(3) 0.2063(4) 0.0266(10) Uani 1 1 d . . . . .
H27 H 0.7560 -0.3159 0.2118 0.032 Uiso 1 1 calc R U . . .
C28 C 0.7966(4) -0.2012(2) 0.2846(3) 0.0183(8) Uani 1 1 d . . . . .
C29 C 0.7485(4) -0.2220(2) 0.3850(4) 0.0209(9) Uani 1 1 d . . . . .
H29A H 0.6946 -0.2721 0.3623 0.025 Uiso 1 1 calc R U . . .
H29B H 0.8248 -0.2353 0.4570 0.025 Uiso 1 1 calc R U . . .
C30 C 0.5466(4) -0.1371(3) 0.3222(4) 0.0208(9) Uani 1 1 d . . . . .
H30 H 0.5681 -0.1171 0.2519 0.025 Uiso 1 1 calc R U . . .
C31 C 0.4864(4) -0.0648(3) 0.3672(4) 0.0213(9) Uani 1 1 d . . . . .
H31 H 0.4633 -0.0836 0.4373 0.026 Uiso 1 1 calc R U . . .
C32 C 0.3620(4) -0.0352(3) 0.2686(5) 0.0334(12) Uani 1 1 d . . . . .
H32A H 0.3842 -0.0124 0.2012 0.040 Uiso 1 1 calc R U . . .
H32B H 0.3213 0.0088 0.3006 0.040 Uiso 1 1 calc R U . . .
C33 C 0.2652(5) -0.1060(4) 0.2230(6) 0.0457(16) Uani 1 1 d . . . . .
H33A H 0.2358 -0.1248 0.2884 0.055 Uiso 1 1 calc R U . . .
H33B H 0.1880 -0.0863 0.1563 0.055 Uiso 1 1 calc R U . . .
C34 C 0.3256(5) -0.1771(4) 0.1799(5) 0.0437(15) Uani 1 1 d . . . . .
H34A H 0.3464 -0.1599 0.1089 0.052 Uiso 1 1 calc R U . . .
H34B H 0.2620 -0.2226 0.1552 0.052 Uiso 1 1 calc R U . . .
C35 C 0.4502(5) -0.2073(3) 0.2782(4) 0.0308(11) Uani 1 1 d . . . . .
H35A H 0.4284 -0.2298 0.3461 0.037 Uiso 1 1 calc R U . . .
H35B H 0.4902 -0.2516 0.2459 0.037 Uiso 1 1 calc R U . . .
C36 C 0.6959(4) -0.0960(3) 0.7228(4) 0.0214(9) Uani 1 1 d . . . . .
C37 C 0.6906(6) -0.1162(4) 0.8406(4) 0.0358(12) Uani 1 1 d . . . . .
H37A H 0.7367 -0.1679 0.8687 0.054 Uiso 1 1 calc R U . . .
H37B H 0.5996 -0.1220 0.8346 0.054 Uiso 1 1 calc R U . . .
H37C H 0.7320 -0.0725 0.8975 0.054 Uiso 1 1 calc R U . . .
C38 C 1.0105(4) -0.1388(3) 0.6568(4) 0.0198(8) Uani 1 1 d . . . . .
C39 C 1.1226(5) -0.1761(4) 0.7480(4) 0.0357(12) Uani 1 1 d . . . . .
H39A H 1.1917 -0.1351 0.7788 0.054 Uiso 1 1 calc R U . . .
H39B H 1.1547 -0.2218 0.7127 0.054 Uiso 1 1 calc R U . . .
H39C H 1.0969 -0.1964 0.8140 0.054 Uiso 1 1 calc R U . . .
B1 B 1.1758(7) 0.1949(4) 0.2396(5) 0.0353(14) Uani 1 1 d . . . . .
F1 F 1.0940(4) 0.2506(3) 0.1657(4) 0.0724(13) Uani 1 1 d . . . . .
F2 F 1.2776(5) 0.1827(3) 0.1916(4) 0.0643(11) Uani 1 1 d . . . . .
F3 F 1.1329(5) 0.1179(3) 0.2438(4) 0.0779(15) Uani 1 1 d . . . . .
F4 F 1.2317(3) 0.2288(2) 0.3538(3) 0.0442(8) Uani 1 1 d . . . . .
B2 B 0.6409(5) 0.5117(4) 0.3039(5) 0.0316(13) Uani 1 1 d . . . . .
F5 F 0.7143(7) 0.5229(8) 0.2287(6) 0.0567(18) Uani 0.506(6) 1 d . . P A 1
F6 F 0.5788(17) 0.5864(9) 0.2937(12) 0.109(5) Uani 0.506(6) 1 d . . P A 1
F7 F 0.5516(15) 0.4577(10) 0.2646(11) 0.138(6) Uani 0.506(6) 1 d . . P A 1
F8 F 0.720(2) 0.4963(14) 0.4119(19) 0.069(7) Uani 0.506(6) 1 d . . P A 1
F9 F 0.7007(19) 0.4944(9) 0.4311(17) 0.037(3) Uani 0.494(6) 1 d . . P A 2
F10 F 0.6502(17) 0.4409(9) 0.2410(9) 0.122(6) Uani 0.494(6) 1 d . . P A 2
F11 F 0.6826(16) 0.5757(10) 0.2675(13) 0.138(6) Uani 0.494(6) 1 d . . P A 2
F12 F 0.5113(7) 0.5218(9) 0.2767(6) 0.0567(18) Uani 0.494(6) 1 d . . P A 2
 
loop_
 _atom_site_aniso_label
 _atom_site_aniso_U_11
 _atom_site_aniso_U_22
 _atom_site_aniso_U_33
 _atom_site_aniso_U_23
 _atom_site_aniso_U_13
 _atom_site_aniso_U_12
Fe1 0.0104(2) 0.0159(2) 0.0091(2) 0.00252(19) 0.00296(18) 0.0008(2)
P1 0.0187(5) 0.0170(5) 0.0110(4) -0.0001(4) 0.0047(4) 0.0005(4)
P2 0.0114(4) 0.0138(5) 0.0104(4) 0.0009(3) 0.0036(3) 0.0009(3)
N1 0.0133(16) 0.0213(17) 0.0157(16) 0.0076(14) 0.0050(13) 0.0027(13)
N2 0.0186(17) 0.0172(17) 0.0137(16) 0.0072(13) 0.0055(13) -0.0035(14)
N3 0.0158(16) 0.0210(17) 0.0144(16) 0.0042(12) 0.0060(13) 0.0024(13)
N4 0.0143(16) 0.0197(17) 0.0126(15) 0.0023(13) 0.0044(13) 0.0002(13)
C1 0.020(2) 0.030(2) 0.024(2) 0.0032(18) 0.0101(17) 0.0079(18)
C2 0.029(2) 0.027(2) 0.020(2) 0.0020(17) 0.0149(18) 0.0094(19)
C3 0.038(3) 0.035(3) 0.027(2) 0.006(2) 0.019(2) 0.018(2)
C4 0.064(4) 0.025(3) 0.037(3) 0.014(2) 0.033(3) 0.023(3)
C5 0.060(4) 0.018(2) 0.042(3) 0.003(2) 0.035(3) 0.005(2)
C6 0.046(3) 0.018(2) 0.030(2) -0.0022(18) 0.024(2) 0.000(2)
C7 0.032(2) 0.018(2) 0.0142(18) 0.0008(15) 0.0128(17) 0.0049(17)
C8 0.039(3) 0.022(2) 0.0131(18) -0.0020(16) 0.0088(18) -0.0057(19)
C9 0.061(4) 0.030(3) 0.027(2) -0.006(2) 0.027(2) -0.005(2)
C10 0.103(6) 0.034(3) 0.034(3) -0.010(2) 0.042(4) -0.019(3)
C11 0.117(6) 0.038(3) 0.020(2) -0.006(2) 0.027(3) -0.035(4)
C12 0.081(5) 0.036(3) 0.016(2) 0.008(2) -0.005(3) -0.023(3)
C13 0.051(3) 0.026(2) 0.018(2) 0.0039(18) 0.001(2) -0.010(2)
C14 0.0147(19) 0.023(2) 0.0188(19) -0.0026(16) 0.0021(15) -0.0052(16)
C15 0.0146(19) 0.022(2) 0.024(2) -0.0006(16) 0.0067(16) -0.0045(16)
C16 0.0137(18) 0.025(2) 0.021(2) 0.0019(16) 0.0076(16) -0.0031(16)
C17 0.0168(19) 0.0171(19) 0.0125(17) 0.0039(14) 0.0067(14) 0.0017(15)
C18 0.025(2) 0.020(2) 0.0159(18) 0.0036(15) 0.0086(16) 0.0042(16)
C19 0.038(3) 0.022(2) 0.023(2) 0.0067(18) 0.010(2) 0.010(2)
C20 0.029(3) 0.037(3) 0.023(2) 0.013(2) 0.0029(19) 0.013(2)
C21 0.023(2) 0.037(3) 0.0130(19) 0.0029(17) 0.0008(17) 0.001(2)
C22 0.021(2) 0.021(2) 0.0147(18) 0.0024(15) 0.0060(16) -0.0008(16)
C23 0.0195(19) 0.0173(19) 0.0122(17) -0.0008(14) 0.0026(15) 0.0033(15)
C24 0.025(2) 0.025(2) 0.020(2) -0.0012(17) 0.0085(17) 0.0062(18)
C25 0.030(2) 0.039(3) 0.017(2) -0.0013(18) 0.0091(18) 0.016(2)
C26 0.039(3) 0.028(3) 0.022(2) -0.0086(18) 0.001(2) 0.015(2)
C27 0.038(3) 0.017(2) 0.0149(19) -0.0019(15) -0.0026(18) 0.0093(18)
C28 0.021(2) 0.0150(19) 0.0127(17) 0.0019(14) -0.0012(15) 0.0058(15)
C29 0.026(2) 0.0143(19) 0.0148(18) 0.0023(14) -0.0020(16) 0.0001(16)
C30 0.020(2) 0.025(2) 0.0140(18) 0.0078(16) 0.0008(15) -0.0067(17)
C31 0.0125(17) 0.027(2) 0.0225(19) 0.0100(17) 0.0034(15) -0.0043(16)
C32 0.015(2) 0.041(3) 0.035(2) 0.017(2) -0.0026(18) -0.0022(19)
C33 0.018(2) 0.058(4) 0.048(3) 0.025(3) -0.005(2) -0.013(2)
C34 0.032(3) 0.049(3) 0.034(3) 0.013(2) -0.009(2) -0.024(3)
C35 0.028(2) 0.033(3) 0.025(2) 0.0050(19) 0.0007(19) -0.017(2)
C36 0.020(2) 0.025(2) 0.021(2) 0.0030(17) 0.0086(17) 0.0056(17)
C37 0.046(3) 0.046(3) 0.024(2) 0.014(2) 0.024(2) 0.016(3)
C38 0.018(2) 0.026(2) 0.0168(19) 0.0020(16) 0.0078(16) 0.0054(17)
C39 0.024(2) 0.056(3) 0.024(2) 0.009(2) 0.0047(19) 0.017(2)
B1 0.044(4) 0.030(3) 0.027(3) 0.002(2) 0.006(3) -0.012(3)
F1 0.060(3) 0.095(4) 0.061(3) 0.023(2) 0.019(2) 0.028(2)
F2 0.076(3) 0.073(3) 0.052(2) -0.006(2) 0.032(2) 0.011(2)
F3 0.127(4) 0.057(3) 0.049(2) 0.000(2) 0.031(3) -0.038(3)
F4 0.0390(18) 0.062(2) 0.0354(17) -0.0234(15) 0.0175(14) -0.0168(16)
B2 0.021(3) 0.034(3) 0.034(3) 0.013(2) 0.003(2) -0.006(2)
F5 0.030(3) 0.113(6) 0.026(2) -0.012(3) 0.007(2) -0.016(3)
F6 0.149(13) 0.104(10) 0.104(9) 0.054(8) 0.082(9) 0.064(10)
F7 0.124(8) 0.123(8) 0.091(6) 0.073(6) -0.057(6) -0.110(7)
F8 0.056(9) 0.097(10) 0.032(7) 0.031(6) -0.012(6) -0.047(7)
F9 0.042(6) 0.032(5) 0.027(6) 0.006(4) 0.000(4) 0.002(5)
F10 0.207(14) 0.119(10) 0.056(5) 0.040(6) 0.069(8) 0.135(11)
F11 0.124(8) 0.123(8) 0.091(6) 0.073(6) -0.057(6) -0.110(7)
F12 0.030(3) 0.113(6) 0.026(2) -0.012(3) 0.007(2) -0.016(3)
 
_geom_special_details
;
 All esds (except the esd in the dihedral angle between two l.s. planes)
 are estimated using the full covariance matrix.  The cell esds are taken
 into account individually in the estimation of esds in distances, angles
 and torsion angles; correlations between esds in cell parameters are only
 used when they are defined by crystal symmetry.  An approximate (isotropic)
 treatment of cell esds is used for estimating esds involving l.s. planes.
;
 
loop_
 _geom_bond_atom_site_label_1
 _geom_bond_atom_site_label_2
 _geom_bond_distance
 _geom_bond_site_symmetry_2
 _geom_bond_publ_flag
Fe1 N4 1.932(3) . ?
Fe1 N3 1.979(3) . ?
Fe1 N1 2.035(3) . ?
Fe1 N2 2.048(4) . ?
Fe1 P1 2.2187(12) . ?
Fe1 P2 2.2193(11) . ?
P1 C7 1.819(4) . ?
P1 C14 1.826(4) . ?
P1 C8 1.834(4) . ?
P2 C23 1.826(4) . ?
P2 C16 1.829(4) . ?
P2 C17 1.848(4) . ?
N1 C31 1.484(5) . ?
N1 C1 1.496(6) . ?
N1 H1 0.88(6) . ?
N2 C29 1.478(6) . ?
N2 C30 1.487(5) . ?
N2 H2 0.73(5) . ?
N3 C36 1.140(6) . ?
N4 C38 1.141(5) . ?
C1 C2 1.512(7) . ?
C1 H1A 0.9900 . ?
C1 H1B 0.9900 . ?
C2 C3 1.398(7) . ?
C2 C7 1.403(7) . ?
C3 C4 1.388(8) . ?
C3 H3 0.9500 . ?
C4 C5 1.386(9) . ?
C4 H4 0.9500 . ?
C5 C6 1.387(7) . ?
C5 H5 0.9500 . ?
C6 C7 1.408(6) . ?
C6 H6 0.9500 . ?
C8 C13 1.393(7) . ?
C8 C9 1.394(7) . ?
C9 C10 1.390(7) . ?
C9 H9 0.9500 . ?
C10 C11 1.368(11) . ?
C10 H10 0.9500 . ?
C11 C12 1.381(11) . ?
C11 H11 0.9500 . ?
C12 C13 1.398(8) . ?
C12 H12 0.9500 . ?
C13 H13 0.9500 . ?
C14 C15 1.524(6) . ?
C14 H14A 0.9900 . ?
C14 H14B 0.9900 . ?
C15 C16 1.527(6) . ?
C15 H15A 0.9900 . ?
C15 H15B 0.9900 . ?
C16 H16A 0.9900 . ?
C16 H16B 0.9900 . ?
C17 C18 1.398(6) . ?
C17 C22 1.404(6) . ?
C18 C19 1.386(6) . ?
C18 H18 0.9500 . ?
C19 C20 1.390(7) . ?
C19 H19 0.9500 . ?
C20 C21 1.380(8) . ?
C20 H20 0.9500 . ?
C21 C22 1.385(6) . ?
C21 H21 0.9500 . ?
C22 H22 0.9500 . ?
C23 C24 1.398(6) . ?
C23 C28 1.418(6) . ?
C24 C25 1.390(6) . ?
C24 H24 0.9500 . ?
C25 C26 1.376(8) . ?
C25 H25 0.9500 . ?
C26 C27 1.394(8) . ?
C26 H26 0.9500 . ?
C27 C28 1.406(6) . ?
C27 H27 0.9500 . ?
C28 C29 1.505(6) . ?
C29 H29A 0.9900 . ?
C29 H29B 0.9900 . ?
C30 C35 1.522(6) . ?
C30 C31 1.538(7) . ?
C30 H30 1.0000 . ?
C31 C32 1.533(6) . ?
C31 H31 1.0000 . ?
C32 C33 1.534(8) . ?
C32 H32A 0.9900 . ?
C32 H32B 0.9900 . ?
C33 C34 1.512(10) . ?
C33 H33A 0.9900 . ?
C33 H33B 0.9900 . ?
C34 C35 1.536(7) . ?
C34 H34A 0.9900 . ?
C34 H34B 0.9900 . ?
C35 H35A 0.9900 . ?
C35 H35B 0.9900 . ?
C36 C37 1.462(6) . ?
C37 H37A 0.9800 . ?
C37 H37B 0.9800 . ?
C37 H37C 0.9800 . ?
C38 C39 1.459(6) . ?
C39 H39A 0.9800 . ?
C39 H39B 0.9800 . ?
C39 H39C 0.9800 . ?
B1 F3 1.350(7) . ?
B1 F1 1.360(8) . ?
B1 F4 1.394(7) . ?
B1 F2 1.434(8) . ?
B2 F11 1.276(10) . ?
B2 F7 1.279(10) . ?
B2 F8 1.30(2) . ?
B2 F12 1.352(10) . ?
B2 F6 1.382(13) . ?
B2 F10 1.399(13) . ?
B2 F5 1.409(10) . ?
B2 F9 1.452(19) . ?
 
loop_
 _geom_angle_atom_site_label_1
 _geom_angle_atom_site_label_2
 _geom_angle_atom_site_label_3
 _geom_angle
 _geom_angle_site_symmetry_1
 _geom_angle_site_symmetry_3
 _geom_angle_publ_flag
N4 Fe1 N3 85.42(14) . . ?
N4 Fe1 N1 174.95(15) . . ?
N3 Fe1 N1 90.06(14) . . ?
N4 Fe1 N2 93.17(15) . . ?
N3 Fe1 N2 87.01(15) . . ?
N1 Fe1 N2 84.35(15) . . ?
N4 Fe1 P1 87.87(11) . . ?
N3 Fe1 P1 89.39(11) . . ?
N1 Fe1 P1 94.32(11) . . ?
N2 Fe1 P1 176.16(11) . . ?
N4 Fe1 P2 91.17(11) . . ?
N3 Fe1 P2 175.81(11) . . ?
N1 Fe1 P2 93.25(11) . . ?
N2 Fe1 P2 90.75(11) . . ?
P1 Fe1 P2 92.92(4) . . ?
C7 P1 C14 105.3(2) . . ?
C7 P1 C8 102.5(2) . . ?
C14 P1 C8 102.0(2) . . ?
C7 P1 Fe1 113.81(15) . . ?
C14 P1 Fe1 114.72(15) . . ?
C8 P1 Fe1 116.96(15) . . ?
C23 P2 C16 102.3(2) . . ?
C23 P2 C17 100.47(18) . . ?
C16 P2 C17 106.22(19) . . ?
C23 P2 Fe1 114.25(14) . . ?
C16 P2 Fe1 116.65(14) . . ?
C17 P2 Fe1 115.01(13) . . ?
C31 N1 C1 112.4(3) . . ?
C31 N1 Fe1 109.0(3) . . ?
C1 N1 Fe1 115.4(3) . . ?
C31 N1 H1 107(3) . . ?
C1 N1 H1 106(3) . . ?
Fe1 N1 H1 106(3) . . ?
C29 N2 C30 114.6(3) . . ?
C29 N2 Fe1 118.8(3) . . ?
C30 N2 Fe1 108.9(3) . . ?
C29 N2 H2 99(4) . . ?
C30 N2 H2 106(4) . . ?
Fe1 N2 H2 108(4) . . ?
C36 N3 Fe1 167.3(4) . . ?
C38 N4 Fe1 169.7(4) . . ?
N1 C1 C2 112.0(4) . . ?
N1 C1 H1A 109.2 . . ?
C2 C1 H1A 109.2 . . ?
N1 C1 H1B 109.2 . . ?
C2 C1 H1B 109.2 . . ?
H1A C1 H1B 107.9 . . ?
C3 C2 C7 118.4(5) . . ?
C3 C2 C1 119.2(4) . . ?
C7 C2 C1 122.4(4) . . ?
C4 C3 C2 121.1(5) . . ?
C4 C3 H3 119.5 . . ?
C2 C3 H3 119.5 . . ?
C5 C4 C3 120.7(5) . . ?
C5 C4 H4 119.6 . . ?
C3 C4 H4 119.6 . . ?
C4 C5 C6 119.0(5) . . ?
C4 C5 H5 120.5 . . ?
C6 C5 H5 120.5 . . ?
C5 C6 C7 120.9(5) . . ?
C5 C6 H6 119.6 . . ?
C7 C6 H6 119.6 . . ?
C2 C7 C6 119.9(4) . . ?
C2 C7 P1 119.6(3) . . ?
C6 C7 P1 120.3(4) . . ?
C13 C8 C9 119.0(4) . . ?
C13 C8 P1 121.3(4) . . ?
C9 C8 P1 119.7(4) . . ?
C10 C9 C8 120.7(6) . . ?
C10 C9 H9 119.7 . . ?
C8 C9 H9 119.7 . . ?
C11 C10 C9 120.4(7) . . ?
C11 C10 H10 119.8 . . ?
C9 C10 H10 119.8 . . ?
C10 C11 C12 119.5(5) . . ?
C10 C11 H11 120.3 . . ?
C12 C11 H11 120.3 . . ?
C11 C12 C13 121.2(6) . . ?
C11 C12 H12 119.4 . . ?
C13 C12 H12 119.4 . . ?
C8 C13 C12 119.2(6) . . ?
C8 C13 H13 120.4 . . ?
C12 C13 H13 120.4 . . ?
C15 C14 P1 115.8(3) . . ?
C15 C14 H14A 108.3 . . ?
P1 C14 H14A 108.3 . . ?
C15 C14 H14B 108.3 . . ?
P1 C14 H14B 108.3 . . ?
H14A C14 H14B 107.4 . . ?
C14 C15 C16 114.4(4) . . ?
C14 C15 H15A 108.7 . . ?
C16 C15 H15A 108.7 . . ?
C14 C15 H15B 108.7 . . ?
C16 C15 H15B 108.7 . . ?
H15A C15 H15B 107.6 . . ?
C15 C16 P2 117.2(3) . . ?
C15 C16 H16A 108.0 . . ?
P2 C16 H16A 108.0 . . ?
C15 C16 H16B 108.0 . . ?
P2 C16 H16B 108.0 . . ?
H16A C16 H16B 107.2 . . ?
C18 C17 C22 118.0(4) . . ?
C18 C17 P2 120.4(3) . . ?
C22 C17 P2 121.2(3) . . ?
C19 C18 C17 120.9(4) . . ?
C19 C18 H18 119.6 . . ?
C17 C18 H18 119.6 . . ?
C18 C19 C20 120.2(4) . . ?
C18 C19 H19 119.9 . . ?
C20 C19 H19 119.9 . . ?
C21 C20 C19 119.8(4) . . ?
C21 C20 H20 120.1 . . ?
C19 C20 H20 120.1 . . ?
C20 C21 C22 120.2(4) . . ?
C20 C21 H21 119.9 . . ?
C22 C21 H21 119.9 . . ?
C21 C22 C17 121.0(4) . . ?
C21 C22 H22 119.5 . . ?
C17 C22 H22 119.5 . . ?
C24 C23 C28 119.3(4) . . ?
C24 C23 P2 117.9(3) . . ?
C28 C23 P2 122.5(3) . . ?
C25 C24 C23 121.9(5) . . ?
C25 C24 H24 119.1 . . ?
C23 C24 H24 119.1 . . ?
C26 C25 C24 118.8(5) . . ?
C26 C25 H25 120.6 . . ?
C24 C25 H25 120.6 . . ?
C25 C26 C27 120.7(4) . . ?
C25 C26 H26 119.6 . . ?
C27 C26 H26 119.6 . . ?
C26 C27 C28 121.3(5) . . ?
C26 C27 H27 119.4 . . ?
C28 C27 H27 119.4 . . ?
C27 C28 C23 117.8(4) . . ?
C27 C28 C29 116.1(4) . . ?
C23 C28 C29 125.8(4) . . ?
N2 C29 C28 116.6(3) . . ?
N2 C29 H29A 108.1 . . ?
C28 C29 H29A 108.1 . . ?
N2 C29 H29B 108.1 . . ?
C28 C29 H29B 108.1 . . ?
H29A C29 H29B 107.3 . . ?
N2 C30 C35 115.4(4) . . ?
N2 C30 C31 107.6(3) . . ?
C35 C30 C31 111.5(4) . . ?
N2 C30 H30 107.3 . . ?
C35 C30 H30 107.3 . . ?
C31 C30 H30 107.3 . . ?
N1 C31 C32 112.7(4) . . ?
N1 C31 C30 107.8(3) . . ?
C32 C31 C30 110.5(4) . . ?
N1 C31 H31 108.6 . . ?
C32 C31 H31 108.6 . . ?
C30 C31 H31 108.6 . . ?
C31 C32 C33 110.7(4) . . ?
C31 C32 H32A 109.5 . . ?
C33 C32 H32A 109.5 . . ?
C31 C32 H32B 109.5 . . ?
C33 C32 H32B 109.5 . . ?
H32A C32 H32B 108.1 . . ?
C34 C33 C32 111.6(5) . . ?
C34 C33 H33A 109.3 . . ?
C32 C33 H33A 109.3 . . ?
C34 C33 H33B 109.3 . . ?
C32 C33 H33B 109.3 . . ?
H33A C33 H33B 108.0 . . ?
C33 C34 C35 111.5(5) . . ?
C33 C34 H34A 109.3 . . ?
C35 C34 H34A 109.3 . . ?
C33 C34 H34B 109.3 . . ?
C35 C34 H34B 109.3 . . ?
H34A C34 H34B 108.0 . . ?
C30 C35 C34 110.2(4) . . ?
C30 C35 H35A 109.6 . . ?
C34 C35 H35A 109.6 . . ?
C30 C35 H35B 109.6 . . ?
C34 C35 H35B 109.6 . . ?
H35A C35 H35B 108.1 . . ?
N3 C36 C37 177.2(5) . . ?
C36 C37 H37A 109.5 . . ?
C36 C37 H37B 109.5 . . ?
H37A C37 H37B 109.5 . . ?
C36 C37 H37C 109.5 . . ?
H37A C37 H37C 109.5 . . ?
H37B C37 H37C 109.5 . . ?
N4 C38 C39 177.8(5) . . ?
C38 C39 H39A 109.5 . . ?
C38 C39 H39B 109.5 . . ?
H39A C39 H39B 109.5 . . ?
C38 C39 H39C 109.5 . . ?
H39A C39 H39C 109.5 . . ?
H39B C39 H39C 109.5 . . ?
F3 B1 F1 119.1(6) . . ?
F3 B1 F4 111.9(5) . . ?
F1 B1 F4 109.3(5) . . ?
F3 B1 F2 102.4(5) . . ?
F1 B1 F2 105.4(5) . . ?
F4 B1 F2 107.8(5) . . ?
F7 B2 F8 112.9(11) . . ?
F11 B2 F12 106.9(11) . . ?
F7 B2 F6 106.6(12) . . ?
F8 B2 F6 113.3(13) . . ?
F11 B2 F10 113.2(13) . . ?
F12 B2 F10 103.9(9) . . ?
F7 B2 F5 113.1(11) . . ?
F8 B2 F5 108.7(11) . . ?
F6 B2 F5 101.7(7) . . ?
F11 B2 F9 115.4(10) . . ?
F12 B2 F9 109.0(9) . . ?
F10 B2 F9 107.8(7) . . ?
 
loop_
 _geom_torsion_atom_site_label_1
 _geom_torsion_atom_site_label_2
 _geom_torsion_atom_site_label_3
 _geom_torsion_atom_site_label_4
 _geom_torsion
 _geom_torsion_site_symmetry_1
 _geom_torsion_site_symmetry_2
 _geom_torsion_site_symmetry_3
 _geom_torsion_site_symmetry_4
 _geom_torsion_publ_flag
C31 N1 C1 C2 -158.0(3) . . . . ?
Fe1 N1 C1 C2 76.2(4) . . . . ?
N1 C1 C2 C3 116.9(4) . . . . ?
N1 C1 C2 C7 -64.9(5) . . . . ?
C7 C2 C3 C4 -1.1(7) . . . . ?
C1 C2 C3 C4 177.1(4) . . . . ?
C2 C3 C4 C5 -1.1(8) . . . . ?
C3 C4 C5 C6 1.9(7) . . . . ?
C4 C5 C6 C7 -0.3(7) . . . . ?
C3 C2 C7 C6 2.7(6) . . . . ?
C1 C2 C7 C6 -175.6(4) . . . . ?
C3 C2 C7 P1 -172.3(3) . . . . ?
C1 C2 C7 P1 9.4(6) . . . . ?
C5 C6 C7 C2 -1.9(7) . . . . ?
C5 C6 C7 P1 173.0(4) . . . . ?
C14 P1 C7 C2 151.4(3) . . . . ?
C8 P1 C7 C2 -102.3(4) . . . . ?
Fe1 P1 C7 C2 24.9(4) . . . . ?
C14 P1 C7 C6 -23.6(4) . . . . ?
C8 P1 C7 C6 82.7(4) . . . . ?
Fe1 P1 C7 C6 -150.1(3) . . . . ?
C7 P1 C8 C13 -145.6(4) . . . . ?
C14 P1 C8 C13 -36.7(4) . . . . ?
Fe1 P1 C8 C13 89.3(4) . . . . ?
C7 P1 C8 C9 36.3(4) . . . . ?
C14 P1 C8 C9 145.1(4) . . . . ?
Fe1 P1 C8 C9 -88.9(4) . . . . ?
C13 C8 C9 C10 0.6(8) . . . . ?
P1 C8 C9 C10 178.8(4) . . . . ?
C8 C9 C10 C11 1.0(9) . . . . ?
C9 C10 C11 C12 -1.9(9) . . . . ?
C10 C11 C12 C13 1.2(9) . . . . ?
C9 C8 C13 C12 -1.3(7) . . . . ?
P1 C8 C13 C12 -179.5(4) . . . . ?
C11 C12 C13 C8 0.5(8) . . . . ?
C7 P1 C14 C15 -66.5(4) . . . . ?
C8 P1 C14 C15 -173.2(3) . . . . ?
Fe1 P1 C14 C15 59.4(4) . . . . ?
P1 C14 C15 C16 -68.2(4) . . . . ?
C14 C15 C16 P2 63.6(4) . . . . ?
C23 P2 C16 C15 -176.6(3) . . . . ?
C17 P2 C16 C15 78.6(3) . . . . ?
Fe1 P2 C16 C15 -51.1(4) . . . . ?
C23 P2 C17 C18 -165.2(4) . . . . ?
C16 P2 C17 C18 -59.0(4) . . . . ?
Fe1 P2 C17 C18 71.6(4) . . . . ?
C23 P2 C17 C22 22.6(4) . . . . ?
C16 P2 C17 C22 128.8(4) . . . . ?
Fe1 P2 C17 C22 -100.6(3) . . . . ?
C22 C17 C18 C19 0.1(6) . . . . ?
P2 C17 C18 C19 -172.3(4) . . . . ?
C17 C18 C19 C20 1.5(7) . . . . ?
C18 C19 C20 C21 -2.1(8) . . . . ?
C19 C20 C21 C22 1.2(8) . . . . ?
C20 C21 C22 C17 0.4(7) . . . . ?
C18 C17 C22 C21 -1.1(7) . . . . ?
P2 C17 C22 C21 171.3(3) . . . . ?
C16 P2 C23 C24 -45.0(4) . . . . ?
C17 P2 C23 C24 64.3(4) . . . . ?
Fe1 P2 C23 C24 -172.0(3) . . . . ?
C16 P2 C23 C28 141.3(3) . . . . ?
C17 P2 C23 C28 -109.4(3) . . . . ?
Fe1 P2 C23 C28 14.3(4) . . . . ?
C28 C23 C24 C25 1.2(6) . . . . ?
P2 C23 C24 C25 -172.7(3) . . . . ?
C23 C24 C25 C26 2.8(7) . . . . ?
C24 C25 C26 C27 -3.6(7) . . . . ?
C25 C26 C27 C28 0.5(7) . . . . ?
C26 C27 C28 C23 3.5(6) . . . . ?
C26 C27 C28 C29 -170.7(4) . . . . ?
C24 C23 C28 C27 -4.3(6) . . . . ?
P2 C23 C28 C27 169.3(3) . . . . ?
C24 C23 C28 C29 169.3(4) . . . . ?
P2 C23 C28 C29 -17.0(6) . . . . ?
C30 N2 C29 C28 63.2(5) . . . . ?
Fe1 N2 C29 C28 -67.9(4) . . . . ?
C27 C28 C29 N2 -143.0(4) . . . . ?
C23 C28 C29 N2 43.3(6) . . . . ?
C29 N2 C30 C35 60.3(5) . . . . ?
Fe1 N2 C30 C35 -163.9(3) . . . . ?
C29 N2 C30 C31 -174.4(3) . . . . ?
Fe1 N2 C30 C31 -38.6(4) . . . . ?
C1 N1 C31 C32 68.6(5) . . . . ?
Fe1 N1 C31 C32 -162.3(3) . . . . ?
C1 N1 C31 C30 -169.3(3) . . . . ?
Fe1 N1 C31 C30 -40.1(4) . . . . ?
N2 C30 C31 N1 52.2(4) . . . . ?
C35 C30 C31 N1 179.8(3) . . . . ?
N2 C30 C31 C32 175.8(3) . . . . ?
C35 C30 C31 C32 -56.7(5) . . . . ?
N1 C31 C32 C33 176.1(4) . . . . ?
C30 C31 C32 C33 55.4(5) . . . . ?
C31 C32 C33 C34 -55.7(6) . . . . ?
C32 C33 C34 C35 56.0(6) . . . . ?
N2 C30 C35 C34 179.6(4) . . . . ?
C31 C30 C35 C34 56.3(5) . . . . ?
C33 C34 C35 C30 -56.0(6) . . . . ?
 
_refine_diff_density_max    1.673
_refine_diff_density_min   -0.736
_refine_diff_density_rms    0.087

_shelxl_version_number 2013-4

_shelx_res_file
;
TITL mo_a_0m in P2(1)
CELL 0.71073 10.9646 16.3287 11.9006 90 110.493 90
ZERR 2 0.0006 0.0009 0.0007 0 0.002 0
LATT -1
SYMM -X,0.5+Y,-Z
SFAC C H B F Fe N P
UNIT 78 92 4 16 2 8 4

L.S. 10
PLAN  5
SIZE 0.18 0.38 0.48
TEMP -171.35
HTAB
BOND $H
CONF
MORE -1
fmap 2
acta
REM <olex2.extras>
REM <HklSrc "%.\\new4%20-%20Copy.hkl">
REM </olex2.extras>

EADP F5 F12
EADP F7 F11

WGHT    0.056500    1.829300
FVAR       0.62224   0.50558
FE1   5    0.762296   -0.052702    0.496917    11.00000    0.01036    0.01587 =
         0.00915    0.00252    0.00296    0.00076
P1    7    0.852504    0.061747    0.589552    11.00000    0.01868    0.01697 =
         0.01096   -0.00010    0.00469    0.00052
P2    7    0.834065   -0.032112    0.346453    11.00000    0.01144    0.01378 =
         0.01035    0.00091    0.00360    0.00090
N1    6    0.586782    0.000254    0.408511    11.00000    0.01325    0.02128 =
         0.01571    0.00760    0.00504    0.00273
H1    2    0.594033    0.023096    0.344590    11.00000   -1.20000
N2    6    0.671433   -0.158464    0.418452    11.00000    0.01857    0.01717 =
         0.01371    0.00722    0.00555   -0.00354
H2    2    0.654167   -0.181110    0.463691    11.00000   -1.20000
N3    6    0.704934   -0.078881    0.633082    11.00000    0.01581    0.02096 =
         0.01443    0.00423    0.00599    0.00245
N4    6    0.921292   -0.108859    0.588178    11.00000    0.01425    0.01967 =
         0.01264    0.00228    0.00441    0.00017
C1    1    0.547971    0.067001    0.475336    11.00000    0.02034    0.03011 =
         0.02411    0.00323    0.01010    0.00790
AFIX  23
H1A   2    0.565935    0.049255    0.559151    11.00000   -1.20000
H1B   2    0.453192    0.076869    0.437974    11.00000   -1.20000
AFIX   0
C2    1    0.620202    0.145866    0.475455    11.00000    0.02944    0.02661 =
         0.02009    0.00205    0.01495    0.00936
C3    1    0.550079    0.215158    0.419698    11.00000    0.03783    0.03526 =
         0.02731    0.00584    0.01910    0.01758
AFIX  43
H3    2    0.458659    0.211158    0.379380    11.00000   -1.20000
AFIX   0
C4    1    0.611845    0.289716    0.422280    11.00000    0.06363    0.02480 =
         0.03683    0.01377    0.03294    0.02335
AFIX  43
H4    2    0.562494    0.335756    0.382532    11.00000   -1.20000
AFIX   0
C5    1    0.744696    0.297716    0.482201    11.00000    0.05952    0.01760 =
         0.04216    0.00273    0.03481    0.00529
AFIX  43
H5    2    0.786186    0.349222    0.485797    11.00000   -1.20000
AFIX   0
C6    1    0.816210    0.229461    0.536841    11.00000    0.04604    0.01776 =
         0.03031   -0.00219    0.02392   -0.00034
AFIX  43
H6    2    0.907413    0.234366    0.577730    11.00000   -1.20000
AFIX   0
C7    1    0.755429    0.152998    0.532512    11.00000    0.03183    0.01790 =
         0.01422    0.00079    0.01276    0.00490
C8    1    0.883433    0.067861    0.751102    11.00000    0.03888    0.02151 =
         0.01314   -0.00202    0.00877   -0.00565
C9    1    0.787105    0.098131    0.791342    11.00000    0.06124    0.03008 =
         0.02678   -0.00568    0.02653   -0.00536
AFIX  43
H9    2    0.706711    0.116339    0.734844    11.00000   -1.20000
AFIX   0
C10   1    0.807447    0.101955    0.913277    11.00000    0.10260    0.03386 =
         0.03370   -0.01014    0.04164   -0.01884
AFIX  43
H10   2    0.740410    0.121877    0.939382    11.00000   -1.20000
AFIX   0
C11   1    0.923382    0.077213    0.995881    11.00000    0.11673    0.03841 =
         0.01950   -0.00588    0.02741   -0.03538
AFIX  43
H11   2    0.938066    0.081436    1.079220    11.00000   -1.20000
AFIX   0
C12   1    1.018949    0.046032    0.957137    11.00000    0.08127    0.03577 =
         0.01647    0.00826   -0.00518   -0.02299
AFIX  43
H12   2    1.098824    0.027903    1.014551    11.00000   -1.20000
AFIX   0
C13   1    1.000277    0.040661    0.834945    11.00000    0.05141    0.02630 =
         0.01847    0.00393    0.00108   -0.01046
AFIX  43
H13   2    1.066522    0.018716    0.809439    11.00000   -1.20000
AFIX   0
C14   1    1.012830    0.084486    0.582823    11.00000    0.01470    0.02344 =
         0.01876   -0.00262    0.00211   -0.00517
AFIX  23
H14A  2    1.045121    0.135663    0.628066    11.00000   -1.20000
H14B  2    1.073137    0.039986    0.624265    11.00000   -1.20000
AFIX   0
C15   1    1.018780    0.094243    0.457505    11.00000    0.01458    0.02187 =
         0.02403   -0.00061    0.00674   -0.00455
AFIX  23
H15A  2    1.105644    0.115782    0.464863    11.00000   -1.20000
H15B  2    0.953257    0.135389    0.413233    11.00000   -1.20000
AFIX   0
C16   1    0.994537    0.015307    0.384188    11.00000    0.01369    0.02499 =
         0.02078    0.00195    0.00764   -0.00311
AFIX  23
H16A  2    1.060668   -0.025310    0.429124    11.00000   -1.20000
H16B  2    1.009473    0.026857    0.308364    11.00000   -1.20000
AFIX   0
C17   1    0.723283    0.027195    0.219324    11.00000    0.01683    0.01710 =
         0.01246    0.00389    0.00667    0.00170
C18   1    0.705634    0.111168    0.230997    11.00000    0.02525    0.02005 =
         0.01594    0.00356    0.00862    0.00418
AFIX  43
H18   2    0.758763    0.139047    0.301113    11.00000   -1.20000
AFIX   0
C19   1    0.611655    0.154247    0.141621    11.00000    0.03813    0.02184 =
         0.02307    0.00672    0.01016    0.00982
AFIX  43
H19   2    0.602145    0.211516    0.149982    11.00000   -1.20000
AFIX   0
C20   1    0.531251    0.113882    0.039752    11.00000    0.02941    0.03733 =
         0.02293    0.01259    0.00285    0.01337
AFIX  43
H20   2    0.464909    0.143113   -0.020190    11.00000   -1.20000
AFIX   0
C21   1    0.548140    0.031194    0.026000    11.00000    0.02322    0.03730 =
         0.01296    0.00294    0.00080    0.00125
AFIX  43
H21   2    0.494422    0.003739   -0.044280    11.00000   -1.20000
AFIX   0
C22   1    0.643164   -0.011877    0.114348    11.00000    0.02146    0.02119 =
         0.01471    0.00243    0.00603   -0.00080
AFIX  43
H22   2    0.654288   -0.068702    0.103750    11.00000   -1.20000
AFIX   0
C23   1    0.852119   -0.125466    0.269307    11.00000    0.01955    0.01732 =
         0.01224   -0.00078    0.00256    0.00334
C24   1    0.912322   -0.119287    0.183691    11.00000    0.02472    0.02527 =
         0.02008   -0.00119    0.00849    0.00622
AFIX  43
H24   2    0.950911   -0.068742    0.174835    11.00000   -1.20000
AFIX   0
C25   1    0.917318   -0.184968    0.111191    11.00000    0.02997    0.03915 =
         0.01688   -0.00131    0.00909    0.01629
AFIX  43
H25   2    0.962010   -0.180275    0.056012    11.00000   -1.20000
AFIX   0
C26   1    0.856355   -0.256956    0.120749    11.00000    0.03879    0.02847 =
         0.02169   -0.00858    0.00055    0.01535
AFIX  43
H26   2    0.854715   -0.301254    0.068488    11.00000   -1.20000
AFIX   0
C27   1    0.796995   -0.265569    0.206279    11.00000    0.03789    0.01750 =
         0.01490   -0.00188   -0.00255    0.00928
AFIX  43
H27   2    0.756014   -0.315915    0.211759    11.00000   -1.20000
AFIX   0
C28   1    0.796612   -0.201178    0.284588    11.00000    0.02147    0.01497 =
         0.01271    0.00191   -0.00124    0.00576
C29   1    0.748481   -0.222003    0.385006    11.00000    0.02623    0.01433 =
         0.01481    0.00229   -0.00204    0.00014
AFIX  23
H29A  2    0.694608   -0.272127    0.362268    11.00000   -1.20000
H29B  2    0.824848   -0.235334    0.456990    11.00000   -1.20000
AFIX   0
C30   1    0.546551   -0.137106    0.322157    11.00000    0.01967    0.02469 =
         0.01402    0.00783    0.00078   -0.00668
AFIX  13
H30   2    0.568140   -0.117123    0.251907    11.00000   -1.20000
AFIX   0
C31   1    0.486353   -0.064798    0.367232    11.00000    0.01251    0.02680 =
         0.02246    0.01003    0.00338   -0.00434
AFIX  13
H31   2    0.463340   -0.083641    0.437256    11.00000   -1.20000
AFIX   0
C32   1    0.361974   -0.035246    0.268571    11.00000    0.01544    0.04082 =
         0.03484    0.01715   -0.00258   -0.00216
AFIX  23
H32A  2    0.384239   -0.012355    0.201155    11.00000   -1.20000
H32B  2    0.321250    0.008764    0.300587    11.00000   -1.20000
AFIX   0
C33   1    0.265234   -0.106012    0.222961    11.00000    0.01770    0.05771 =
         0.04809    0.02486   -0.00539   -0.01262
AFIX  23
H33A  2    0.235801   -0.124793    0.288375    11.00000   -1.20000
H33B  2    0.187995   -0.086319    0.156253    11.00000   -1.20000
AFIX   0
C34   1    0.325565   -0.177093    0.179896    11.00000    0.03198    0.04909 =
         0.03378    0.01254   -0.00898   -0.02381
AFIX  23
H34A  2    0.346442   -0.159895    0.108919    11.00000   -1.20000
H34B  2    0.262037   -0.222588    0.155209    11.00000   -1.20000
AFIX   0
C35   1    0.450224   -0.207320    0.278183    11.00000    0.02843    0.03253 =
         0.02466    0.00499    0.00068   -0.01703
AFIX  23
H35A  2    0.428413   -0.229822    0.346066    11.00000   -1.20000
H35B  2    0.490157   -0.251616    0.245912    11.00000   -1.20000
AFIX   0
C36   1    0.695913   -0.095961    0.722752    11.00000    0.01984    0.02460 =
         0.02103    0.00296    0.00859    0.00562
C37   1    0.690621   -0.116238    0.840613    11.00000    0.04641    0.04610 =
         0.02431    0.01371    0.02415    0.01638
AFIX 137
H37A  2    0.736734   -0.167888    0.868720    11.00000   -1.50000
H37B  2    0.599582   -0.121969    0.834619    11.00000   -1.50000
H37C  2    0.731998   -0.072450    0.897506    11.00000   -1.50000
AFIX   0
C38   1    1.010475   -0.138815    0.656767    11.00000    0.01836    0.02556 =
         0.01679    0.00199    0.00776    0.00544
C39   1    1.122646   -0.176087    0.748032    11.00000    0.02374    0.05614 =
         0.02436    0.00896    0.00474    0.01683
AFIX 137
H39A  2    1.191723   -0.135145    0.778769    11.00000   -1.50000
H39B  2    1.154666   -0.221775    0.712668    11.00000   -1.50000
H39C  2    1.096916   -0.196383    0.813980    11.00000   -1.50000
AFIX   0

B1    3    1.175804    0.194930    0.239590    11.00000    0.04379    0.02954 =
         0.02748    0.00199    0.00619   -0.01176
F1    4    1.093998    0.250573    0.165727    11.00000    0.05962    0.09480 =
         0.06123    0.02296    0.01911    0.02843
F2    4    1.277578    0.182664    0.191625    11.00000    0.07595    0.07318 =
         0.05157   -0.00611    0.03195    0.01072
F3    4    1.132915    0.117906    0.243805    11.00000    0.12695    0.05742 =
         0.04946   -0.00010    0.03112   -0.03841
F4    4    1.231651    0.228788    0.353765    11.00000    0.03899    0.06183 =
         0.03538   -0.02337    0.01752   -0.01683
B2    3    0.640867    0.511687    0.303869    11.00000    0.02136    0.03395 =
         0.03390    0.01282    0.00285   -0.00640
PART 1
F5    4    0.714338    0.522896    0.228723    21.00000    0.02966    0.11259 =
         0.02590   -0.01159    0.00728   -0.01615
F6    4    0.578785    0.586418    0.293734    21.00000    0.14852    0.10407 =
         0.10427    0.05424    0.08231    0.06362
F7    4    0.551552    0.457667    0.264618    21.00000    0.12444    0.12279 =
         0.09086    0.07274   -0.05676   -0.10951
F8    4    0.720113    0.496312    0.411949    21.00000    0.05558    0.09729 =
         0.03155    0.03065   -0.01170   -0.04713
PART 0
PART 2
F9    4    0.700668    0.494412    0.431124   -21.00000    0.04153    0.03244 =
         0.02745    0.00631   -0.00025    0.00219
F10   4    0.650170    0.440930    0.241044   -21.00000    0.20740    0.11913 =
         0.05612    0.03983    0.06858    0.13545
F11   4    0.682643    0.575727    0.267507   -21.00000    0.12444    0.12279 =
         0.09086    0.07274   -0.05676   -0.10951
F12   4    0.511318    0.521759    0.276684   -21.00000    0.02966    0.11259 =
         0.02590   -0.01159    0.00728   -0.01615
HKLF 4

REM  mo_a_0m in P2(1)
REM R1 =  0.0527 for   10000 Fo > 4sig(Fo)  and  0.0743 for all   12196 data
REM    538 parameters refined using      1 restraints

END

WGHT      0.0565      1.8293

REM Instructions for potential hydrogen bonds
EQIV $1 -x+2, y-1/2, -z+1
HTAB N2 F4_$1
HTAB C1 N3
EQIV $2 -x+1, y-1/2, -z+1
HTAB C1 F12_$2
HTAB C13 F5_$1
HTAB C14 F5_$1
HTAB C14 F8_$1
HTAB C14 F11_$1
HTAB C16 F8_$1
HTAB C16 F9_$1
HTAB C16 F3
EQIV $3 x, y-1, z
HTAB C29 F6_$3
HTAB C29 N4
HTAB C29 F4_$1
EQIV $4 x-1, y, z
HTAB C32 F3_$4
HTAB C37 F1_$1
HTAB C37 F2_$1
HTAB C37 F7_$2
HTAB C39 F10_$1
HTAB C39 F1_$1

REM Highest difference peak  1.673,  deepest hole -0.736,  1-sigma level  0.087
Q1    1   1.0227  0.1869  0.2408  11.00000  0.05    1.67
Q2    1   1.1793  0.2235  0.1540  11.00000  0.05    0.72
Q3    1   1.2160  0.1491  0.2066  11.00000  0.05    0.60
Q4    1   0.9694  0.2296  0.7538  11.00000  0.05    0.60
Q5    1   0.7200  0.4693  0.2610  11.00000  0.05    0.56
;
_shelx_res_checksum   68135

_shelx_hkl_file
;
   2   0   0 3039.41 157.766   1
   2   0   0 3117.59 157.802   4
  -2   0   0 3051.63 157.997   1
  -2   0   0 3133.50 157.955   1
  -2   0   0 3253.24 157.990   4
   2   0   0 3000.41 157.763   1
  -3   0   0 103.784 5.59289   4
   3   0   0 97.3565 6.08368   1
   3   0   0 95.8600 5.62321   4
  -3   0   0 92.7408 6.46574   1
   3   0   0 99.3867 6.10912   1
  -3   0   0 99.9258 6.68229   1
   4   0   0 1167.91 61.0219   1
   4   0   0 1199.18 61.0956   1
  -4   0   0 1217.46 60.5520   4
  -4   0   0 1173.25 61.7513   1
   4   0   0 1103.31 60.5862   4
  -4   0   0 1188.15 62.0137   1
  -4   0   0 1225.51 63.6804   3
   5   0   0 4.96509 1.66218   4
   5   0   0 3.97598 1.98424   1
  -5   0   0 4.73375 1.39653   4
   5   0   0 5.54905 2.09063   1
  -5   0   0 2.75311 4.83784   3
  -5   0   0 3.82660 3.20937   1
  -6   0   0 -6.1902 4.93913   3
  -6   0   0 2.80775 3.83455   1
   6   0   0 1.88106 2.11889   1
  -6   0   0 1.52455 4.09889   1
   6   0   0 0.93688 1.95330   1
  -6   0   0 0.51019 1.38386   4
   7   0   0 322.258 18.2796   1
  -7   0   0 367.621 25.1779   3
  -7   0   0 336.042 23.7767   1
   7   0   0 330.979 18.3531   1
  -7   0   0 355.941 21.5026   1
  -8   0   0 244.180 21.2949   3
  -8   0   0 247.958 18.0267   1
  -8   0   0 226.761 18.5559   1
  -9   0   0 35.4239 8.56186   1
  -9   0   0 41.6990 10.2692   3
  -9   0   0 46.9427 10.1127   1
 -10   0   0 140.740 19.5681   1
 -10   0   0 109.409 18.0360   3
 -10   0   0 158.854 16.5138   1
 -11   0   0 16.7684 10.3690   1
 -11   0   0 4.95177 14.3251   1
 -11   0   0 -6.1840 12.3804   3
 -12   0   0 100.976 15.7298   1
 -12   0   0 100.398 19.8794   3
 -13   0   0 452.353 40.3371   3
 -13   0   0 436.746 35.7159   1
 -14   0   0 51.9601 19.4305   1
 -14   0   0 32.2081 22.9188   3
   1  -1   0 6525.75 324.038   1
   1  -1   0 6376.85 325.185   1
  -1  -1   0 6152.10 322.609   2
  -1   1   0 6213.05 323.460   3
   1   1   0 6996.02 325.644   2
  -1   1   0 6395.96 324.250   1
  -1   1   0 5768.41 322.918   1
   2  -1   0 3300.65 162.085   1
  -2  -1   0 3215.85 161.329   1
   2  -1   0 3225.20 162.165   1
   2  -1   0 3176.33 161.288   4
  -2  -1   0 3200.60 161.321   1
  -2  -1   0 3034.35 161.456   4
  -2   1   0 3067.14 162.559   3
  -2   1   0 3141.06 162.099   1
  -2   1   0 3205.73 162.315   1
  -3  -1   0 468.531 24.3106   1
   3  -1   0 469.788 25.1460   1
   3  -1   0 503.955 24.0495   4
  -3  -1   0 494.959 24.2816   4
  -3  -1   0 488.727 24.3163   1
   3  -1   0 472.390 25.0585   1
  -3   1   0 408.426 25.3085   1
  -3   1   0 408.502 25.0435   1
  -3   1   0 427.042 27.1196   3
   4  -1   0 1605.99 81.9283   1
  -4  -1   0 1521.78 81.5042   1
   4  -1   0 1497.24 81.8427   1
  -4  -1   0 1627.59 83.6727   3
  -4  -1   0 1579.68 80.9376   4
  -4  -1   0 1569.39 81.4450   1
   4  -1   0 1571.32 80.7352   4
  -4   1   0 1586.52 82.7135   1
  -4   1   0 1664.54 83.8650   3
  -5  -1   0 72.6597 6.52782   1
  -5  -1   0 70.9313 6.37599   1
   5  -1   0 76.0060 4.88210   4
  -5  -1   0 75.0248 9.25335   3
   5  -1   0 78.8884 6.58780   1
  -5  -1   0 79.7879 5.07893   4
  -5   1   0 68.3973 7.76579   1
  -5   1   0 54.5960 9.00034   3
  -5   1   0 62.7675 7.51983   1
  -6  -1   0 44.4202 6.33684   1
   6  -1   0 38.6314 3.49673   4
   6  -1   0 38.8371 5.61561   1
  -6  -1   0 34.2752 7.88054   3
  -6  -1   0 36.5475 3.53892   4
   6  -1   0 33.6746 5.97556   1
  -6  -1   0 33.7323 5.97377   1
  -6   1   0 26.7633 6.08608   1
  -6   1   0 23.8141 7.60204   3
  -6   1   0 35.7725 6.29981   1
  -7  -1   0 50.1252 4.41416   4
  -7  -1   0 51.4332 7.53556   1
   7  -1   0 55.9669 6.46693   1
  -7  -1   0 65.1169 11.2530   3
   7  -1   0 52.6220 6.64514   1
  -7  -1   0 48.0882 7.70868   1
  -7   1   0 58.3656 9.89239   1
  -7   1   0 78.9137 11.8950   3
  -7   1   0 67.8413 9.23169   1
   8  -1   0 35.8903 5.84094   1
  -8  -1   0 48.8242 8.35057   1
  -8  -1   0 44.9477 7.47441   1
  -8  -1   0 40.3752 10.7038   3
  -8  -1   0 36.8102 3.52342   4
  -8   1   0 30.9943 10.0497   3
  -8   1   0 27.5015 8.54306   1
  -8   1   0 31.1941 7.80487   1
  -9  -1   0 31.2748 9.44589   1
   9  -1   0 45.2558 5.24536   1
  -9  -1   0 37.1119 8.19951   1
  -9  -1   0 46.0914 12.6500   3
   9  -1   0 45.0406 6.05083   1
  -9   1   0 73.0708 12.1696   1
 -10  -1   0 20.8849 9.58552   2
 -10  -1   0 24.2499 11.4225   3
 -10  -1   0 34.0118 9.35380   1
 -10   1   0 4.99863 11.7605   3
 -10   1   0 13.3412 9.25780   1
 -10   1   0 15.3659 11.9003   1
 -11  -1   0 354.556 29.8742   2
 -11  -1   0 367.112 32.5505   3
 -11  -1   0 333.354 31.2874   1
 -11  -1   0 388.649 28.1265   1
 -11   1   0 440.927 29.8239   1
 -11   1   0 362.967 33.1675   3
 -11   1   0 381.239 33.6338   1
 -12  -1   0 295.226 26.0044   1
 -12  -1   0 288.387 30.0886   3
 -12  -1   0 251.719 32.5856   1
 -12   1   0 244.419 29.7410   3
 -12   1   0 265.547 26.7290   1
 -13  -1   0 23.4493 18.9144   3
 -13  -1   0 55.5342 15.9799   1
 -13   1   0 25.8212 18.8975   3
 -14  -1   0 159.645 29.7010   3
 -14  -1   0 190.689 28.4241   1
 -14   1   0 210.211 36.5233   3
 -14   1   0 260.924 33.1249   1
   0  -2   0 4516.44 237.552   2
   0  -2   0 4664.48 237.488   1
   0  -2   0 4517.96 237.319   1
   0   2   0 4833.51 237.614   2
   0   2   0 4650.99 237.358   1
   0   2   0 4832.45 237.623   1
   1  -2   0 354.873 20.3656   1
  -1  -2   0 390.051 20.2243   2
   1  -2   0 345.314 19.9038   3
   1  -2   0 358.459 20.1265   1
  -1   2   0 359.588 20.3684   1
   1   2   0 381.770 20.1752   2
  -1   2   0 378.168 20.1967   1
  -1   2   0 378.147 19.9676   3
   2  -2   0 1242.22 60.9662   1
  -2  -2   0 1290.50 60.9770   2
   2  -2   0 1245.93 61.2347   1
   2   2   0 1167.00 60.7453   2
  -2   2   0 1093.58 60.8183   1
  -2   2   0 1074.01 60.9801   3
  -2   2   0 1063.76 61.0444   1
  -3  -2   0 780.918 38.9726   2
   3  -2   0 710.765 39.0592   1
  -3  -2   0 684.976 37.9171   4
   3  -2   0 717.406 37.6043   4
   3  -2   0 749.728 38.9065   1
  -3   2   0 728.775 39.3822   1
  -3   2   0 674.577 39.1533   1
  -3   2   0 754.249 40.0493   3
  -4  -2   0 334.701 19.5199   2
  -4  -2   0 315.190 18.0566   4
  -4  -2   0 305.664 17.5691   1
   4  -2   0 327.005 17.6737   4
  -4  -2   0 318.775 17.5908   1
  -4  -2   0 321.249 20.2777   3
   4  -2   0 324.530 19.2935   1
   4  -2   0 335.459 19.5679   1
  -4   2   0 359.584 20.3593   1
  -4   2   0 371.636 21.0042   3
  -5  -2   0 345.183 20.3275   1
   5  -2   0 374.238 21.8542   1
  -5  -2   0 355.283 23.3205   3
   5  -2   0 367.839 19.6796   4
  -5  -2   0 353.348 20.2284   1
  -5  -2   0 363.167 20.1081   4
   5  -2   0 370.238 21.6081   1
  -5   2   0 377.089 22.8419   1
  -5   2   0 400.040 22.6110   1
  -5   2   0 385.694 23.8739   3
   6  -2   0 429.479 22.0792   4
  -6  -2   0 420.978 23.6536   1
   6  -2   0 404.914 24.1452   1
  -6  -2   0 411.212 23.3378   1
   6  -2   0 443.860 24.4651   1
  -6  -2   0 435.076 22.5467   4
  -6  -2   0 441.000 26.8682   3
  -6   2   0 374.469 24.9635   1
  -6   2   0 353.395 26.4671   3
  -7  -2   0 522.650 27.9592   4
  -7  -2   0 517.963 30.0513   1
   7  -2   0 517.542 27.5056   4
   7  -2   0 532.168 29.9225   1
  -7  -2   0 524.011 31.1656   2
  -7  -2   0 533.223 33.5829   3
   7  -2   0 571.822 30.0430   1
  -7  -2   0 528.448 29.7004   1
  -7   2   0 496.502 32.2133   1
  -7   2   0 505.210 31.3777   1
  -7   2   0 495.278 33.4182   3
  -8  -2   0 169.132 17.9636   3
   8  -2   0 177.644 12.9470   1
  -8  -2   0 169.190 13.4098   1
  -8  -2   0 142.607 13.8706   1
  -8  -2   0 168.877 10.3208   4
   8  -2   0 166.625 13.0776   1
  -8  -2   0 186.456 15.8193   2
  -8   2   0 199.826 16.2291   1
  -8   2   0 203.602 18.8417   3
  -8   2   0 161.532 16.8591   1
  -9  -2   0 75.6434 5.82071   4
  -9  -2   0 99.7743 12.8580   1
   9  -2   0 77.1734 9.43767   1
  -9  -2   0 82.3894 14.3877   3
  -9  -2   0 85.3910 12.5188   2
  -9  -2   0 87.3067 12.8463   1
   9  -2   0 88.0516 9.00265   1
  -9   2   0 79.5522 13.9841   3
  -9   2   0 69.8630 11.9680   1
 -10  -2   0 93.3288 14.1677   1
 -10  -2   0 124.592 16.9905   1
  10  -2   0 113.405 10.0506   1
  10  -2   0 107.358 10.7322   1
 -10  -2   0 112.495 17.8917   3
 -10  -2   0 135.329 16.0873   2
 -10   2   0 121.582 16.5052   1
 -10   2   0 119.623 17.9475   3
 -10   2   0 123.803 20.7371   1
 -11  -2   0 3.57295 13.4422   3
 -11  -2   0 18.4553 12.9100   2
 -11  -2   0 5.27550 9.31091   1
 -11  -2   0 2.12705 12.6890   1
 -11   2   0 12.8858 13.8195   3
 -11   2   0 -3.0417 16.4534   1
 -11   2   0 -2.1320 10.0365   1
 -12  -2   0 234.405 29.3535   1
 -12  -2   0 183.422 25.3651   3
 -12  -2   0 172.004 21.8380   1
 -12   2   0 172.142 26.1464   3
 -12   2   0 179.710 23.6583   1
 -13  -2   0 73.3549 20.4173   3
 -13  -2   0 106.427 17.7762   1
 -13   2   0 99.5899 22.3662   3
 -13   2   0 94.0730 19.3368   1
 -14  -2   0 46.5846 29.3326   1
 -14  -2   0 34.9211 22.8717   3
 -14   2   0 50.5979 20.4494   1
 -14   2   0 25.3318 22.9664   3
   0  -3   0 -0.3325 0.50313   3
   0  -3   0 -0.2129 1.12455   1
   0  -3   0 0.79113 1.46111   1
   0  -3   0 1.63426 1.44366   2
   0   3   0 0.34535 1.11023   1
   0   3   0 1.89555 1.60637   2
   0   3   0 -1.4655 1.25434   1
   1  -3   0 206.327 13.5465   1
  -1  -3   0 214.087 13.2242   2
   1  -3   0 204.441 12.6789   3
   1  -3   0 215.580 13.2019   1
  -1  -3   0 216.620 12.1543   1
  -1  -3   0 217.632 12.0583   1
  -1   3   0 270.955 12.9129   3
   1   3   0 277.106 13.6509   2
   2  -3   0 1407.86 73.7409   1
   2  -3   0 1387.32 74.0920   1
  -2  -3   0 1443.17 73.7582   2
  -2   3   0 1384.18 73.7374   1
  -2   3   0 1358.65 73.5542   3
  -2   3   0 1436.31 74.2315   1
   2   3   0 1488.31 73.7619   2
   3  -3   0 221.365 14.6316   1
  -3  -3   0 208.452 13.8551   2
   3  -3   0 202.232 13.8326   1
  -3   3   0 239.548 14.9017   1
  -3   3   0 263.716 14.8722   3
   4  -3   0 1356.98 68.2894   1
  -4  -3   0 1302.37 67.9126   2
   4  -3   0 1280.02 67.8011   1
   4  -3   0 1234.56 66.0657   4
  -4  -3   0 1159.99 66.4935   4
  -4  -3   0 1233.17 68.1954   3
  -4   3   0 1362.09 68.2303   1
  -4   3   0 1329.24 68.8690   3
  -4   3   0 1270.85 68.5423   1
   5  -3   0 93.7654 9.30045   1
  -5  -3   0 84.0198 6.86977   4
  -5  -3   0 87.8861 5.87184   1
   5  -3   0 100.127 9.09517   1
   5  -3   0 102.522 6.35585   4
  -5  -3   0 91.4847 9.13785   2
  -5  -3   0 96.5595 10.0283   3
  -5  -3   0 95.2963 5.93094   1
  -5   3   0 73.4857 9.78357   1
  -5   3   0 83.2140 10.2830   3
  -5   3   0 77.6681 9.15097   1
  -6  -3   0 32.0111 4.48477   1
  -6  -3   0 32.6647 7.28642   3
   6  -3   0 31.4825 6.00329   1
  -6  -3   0 33.0238 4.66931   1
  -6  -3   0 26.3955 3.99844   4
   6  -3   0 32.6068 3.76282   4
   6  -3   0 27.6298 6.04579   1
  -6  -3   0 24.8731 7.14259   2
  -6   3   0 26.6023 7.57920   3
  -6   3   0 24.0048 6.23643   1
  -6   3   0 23.0428 6.52994   1
   7  -3   0 27.2774 6.74480   1
   7  -3   0 39.8821 4.19994   4
   7  -3   0 31.3463 6.61738   1
  -7  -3   0 28.1979 8.80509   3
  -7  -3   0 47.8770 5.95959   4
  -7  -3   0 36.6967 6.79221   1
  -7  -3   0 32.3898 7.35979   2
  -7  -3   0 30.9236 5.31355   1
  -7   3   0 48.1757 9.82265   3
  -7   3   0 40.3848 9.02112   1
  -8  -3   0 153.097 12.0752   4
  -8  -3   0 204.257 18.3597   3
   8  -3   0 166.025 13.9990   1
   8  -3   0 169.782 9.76508   4
  -8  -3   0 158.156 13.3169   1
  -8  -3   0 193.477 13.1327   1
   8  -3   0 159.549 14.6260   1
  -8  -3   0 191.503 15.5147   2
  -8   3   0 135.406 15.4212   1
  -8   3   0 140.904 17.4327   1
  -8   3   0 154.172 17.5554   3
  -9  -3   0 96.2613 13.2106   1
   9  -3   0 117.577 12.0418   1
   9  -3   0 83.4178 13.7721   1
  -9  -3   0 130.542 11.7786   1
  -9  -3   0 95.3528 14.0379   2
  -9  -3   0 137.151 17.2742   3
  -9  -3   0 99.7547 7.90223   4
  -9   3   0 151.848 18.2162   3
  -9   3   0 113.162 16.2438   1
  -9   3   0 119.668 15.7919   1
  10  -3   0 129.079 12.6068   1
 -10  -3   0 138.594 16.8631   1
 -10  -3   0 134.664 21.0490   3
 -10  -3   0 117.270 13.9635   1
 -10  -3   0 111.844 7.92608   4
  10  -3   0 106.695 12.8503   1
 -10  -3   0 154.133 18.5348   2
 -10   3   0 134.665 17.7383   1
 -10   3   0 119.996 19.5157   3
 -10   3   0 149.642 22.6117   1
  11  -3   0 127.694 13.5708   1
  11  -3   0 164.730 12.8604   1
 -11  -3   0 156.195 17.4417   1
 -11  -3   0 156.458 20.7579   2
 -11  -3   0 156.818 21.5756   1
 -11  -3   0 171.911 23.7808   3
 -11   3   0 150.060 26.3935   3
 -11   3   0 156.641 19.9223   1
 -12  -3   0 -10.985 14.9241   3
 -12  -3   0 -2.7683 10.6452   1
 -12  -3   0 26.5374 16.1530   1
 -12   3   0 0.10647 13.5000   1
 -12   3   0 2.72255 15.0542   3
 -13  -3   0 80.1379 21.3990   3
 -13  -3   0 129.524 18.3654   1
 -13   3   0 113.447 21.0141   1
 -14  -3   0 100.516 25.9574   3
 -14   3   0 166.093 26.0608   1
 -14   3   0 157.487 29.7103   3
   0  -4   0 576.777 32.1455   1
   0  -4   0 571.621 32.4891   2
   0  -4   0 572.383 32.5098   1
   0  -4   0 565.601 31.1089   3
   0   4   0 656.893 32.1882   1
   0   4   0 650.619 32.8069   2
   0   4   0 649.382 32.4973   1
  -1  -4   0 1093.35 56.8884   1
   1  -4   0 1056.05 57.1761   3
   1  -4   0 1078.79 58.4255   1
  -1  -4   0 1138.28 57.1763   1
   1  -4   0 1089.41 57.9793   1
  -1  -4   0 1130.03 58.1329   2
  -1   4   0 1106.01 57.1572   3
  -1   4   0 1115.13 58.0627   1
  -1   4   0 1132.60 58.4437   1
   1   4   0 1135.57 57.0828   1
   1   4   0 1084.41 58.1207   2
   2  -4   0 3730.49 181.149   1
  -2  -4   0 3502.49 180.485   2
   2  -4   0 3541.47 180.530   1
  -2   4   0 3626.87 180.648   1
   2   4   0 3331.90 183.034   2
  -2   4   0 3564.61 181.068   1
  -2   4   0 3302.53 179.933   3
   3  -4   0 404.262 24.9160   1
   3  -4   0 439.728 25.6233   1
  -3  -4   0 421.757 24.9916   2
  -3   4   0 463.954 25.4641   1
  -3   4   0 416.783 25.6196   1
  -3   4   0 451.668 25.3123   3
   3   4   0 454.220 25.1215   2
   4  -4   0 606.830 34.4708   1
  -4  -4   0 611.938 34.2074   2
  -4  -4   0 575.124 33.9354   3
   4  -4   0 570.139 33.8558   1
  -4   4   0 641.235 34.5305   1
  -4   4   0 593.630 34.9939   1
  -4   4   0 627.744 34.6916   3
   5  -4   0 392.262 23.6104   1
   5  -4   0 342.171 22.7769   1
  -5  -4   0 370.505 23.6368   3
   5  -4   0 359.386 20.7593   4
  -5  -4   0 379.854 23.2390   2
  -5  -4   0 378.367 21.6689   4
  -5   4   0 395.860 24.4344   3
  -5   4   0 360.379 24.3362   1
  -5   4   0 415.629 24.0885   1
  -6  -4   0 446.592 28.8885   3
  -6  -4   0 471.489 25.9815   4
  -6  -4   0 451.004 24.5611   1
  -6  -4   0 464.666 28.1202   2
  -6  -4   0 424.443 24.5539   1
   6  -4   0 475.110 25.0954   4
   6  -4   0 477.645 28.3372   1
  -6   4   0 444.571 29.1498   1
  -6   4   0 493.930 28.8720   1
  -6   4   0 461.284 29.5561   3
  -7  -4   0 466.717 27.3559   1
   7  -4   0 485.756 30.4680   1
   7  -4   0 487.377 30.2582   1
  -7  -4   0 539.190 28.1441   4
   7  -4   0 518.115 27.0247   4
  -7  -4   0 478.058 27.6369   1
  -7  -4   0 528.387 31.3723   2
  -7  -4   0 501.169 32.3392   3
  -7   4   0 473.763 32.3943   1
  -7   4   0 508.837 32.8820   3
  -7   4   0 519.145 31.7400   1
   8  -4   0 44.0821 10.4295   1
  -8  -4   0 49.3048 7.21800   1
  -8  -4   0 44.6871 6.74142   1
  -8  -4   0 44.6255 11.2813   3
   8  -4   0 49.2975 5.14161   4
   8  -4   0 34.5269 8.31689   1
  -8  -4   0 52.5039 10.0904   2
  -8  -4   0 47.6772 6.76828   4
  -8   4   0 64.8958 10.8605   1
  -8   4   0 55.0024 11.4826   3
  -8   4   0 34.1510 13.4965   1
  -9  -4   0 109.017 12.8514   1
   9  -4   0 121.978 7.93283   4
  -9  -4   0 133.295 11.8839   1
   9  -4   0 148.393 14.8880   1
  -9  -4   0 127.545 15.7733   2
  -9  -4   0 140.598 10.0329   4
   9  -4   0 136.774 14.1252   1
  -9  -4   0 118.879 17.6261   3
  -9   4   0 131.908 18.1944   3
  -9   4   0 152.044 17.0155   1
  -9   4   0 127.972 18.6173   1
 -10  -4   0 71.9266 14.9583   3
 -10  -4   0 82.5966 14.7857   2
  10  -4   0 74.0902 12.6479   1
 -10  -4   0 77.7171 11.7637   1
  10  -4   0 66.9109 10.9704   1
 -10  -4   0 90.5901 14.2040   1
 -10   4   0 104.610 17.2421   1
 -10   4   0 73.6136 18.1372   1
 -10   4   0 118.703 19.3555   3
 -11  -4   0 34.9204 4.10518   4
 -11  -4   0 28.0623 9.52723   1
  11  -4   0 29.4897 8.56769   1
 -11  -4   0 29.4466 15.3021   3
 -11  -4   0 24.4666 16.0103   2
 -11  -4   0 41.4175 12.7259   1
 -11   4   0 47.2287 14.6157   3
 -11   4   0 33.5559 12.3323   1
 -12  -4   0 92.8197 14.4681   1
 -12  -4   0 52.6578 23.9263   1
 -12  -4   0 115.867 20.2331   3
  12  -4   0 91.3400 12.6564   1
 -12   4   0 110.016 21.6004   1
 -12   4   0 118.493 20.2590   3
 -13  -4   0 26.5254 19.3936   3
 -13  -4   0 74.4016 15.6617   1
 -13   4   0 34.5024 18.2903   1
 -13   4   0 14.6062 18.7161   3
 -14  -4   0 26.9108 23.4349   3
 -14   4   0 17.1650 23.5388   3
 -14   4   0 21.3338 20.4951   1
   0  -5   0 1.70431 1.91469   1
   0  -5   0 -1.7207 2.24551   1
   0  -5   0 0.48994 0.77415   3
   0  -5   0 -0.9260 2.16135   2
   0   5   0 0.31651 2.10330   1
   0   5   0 4.28468 2.66478   2
   0   5   0 0.06385 0.63585   3
   0   5   0 -0.7982 1.64360   1
   1  -5   0 3700.26 183.965   1
   1  -5   0 3315.93 180.410   3
  -1  -5   0 3604.49 180.892   1
  -1  -5   0 3766.32 181.939   2
   1  -5   0 3728.95 181.699   1
  -1  -5   0 3509.62 180.478   1
   1   5   0 3639.92 181.886   2
  -1   5   0 3498.90 181.916   1
   1   5   0 3374.20 180.059   1
   1   5   0 3341.99 179.918   1
  -1   5   0 3655.98 181.717   2
  -1   5   0 3328.91 180.307   3
  -2  -5   0 71.6548 4.44464   1
   2  -5   0 74.5024 8.01820   1
  -2  -5   0 71.5182 4.61268   1
   2  -5   0 71.0878 7.30832   1
  -2  -5   0 68.0685 6.88466   2
  -2   5   0 65.6033 7.44742   1
  -2   5   0 70.4802 6.23530   3
   2   5   0 75.9725 7.34756   2
  -2   5   0 77.2694 7.21233   1
   3  -5   0 3116.89 156.985   1
  -3  -5   0 3115.08 156.408   2
   3  -5   0 2903.43 156.197   1
  -3   5   0 2876.65 156.845   1
   3   5   0 3061.78 156.154   2
  -3   5   0 3034.31 155.937   3
  -3   5   0 3029.40 156.354   1
  -4  -5   0 482.909 29.1330   3
   4  -5   0 460.907 29.5879   1
  -4  -5   0 476.685 29.5809   2
   4  -5   0 515.225 30.5929   1
  -4  -5   0 484.627 28.7378   4
   4   5   0 571.712 29.9308   2
  -4   5   0 545.287 30.1457   3
  -4   5   0 544.961 30.2161   1
  -5  -5   0 377.220 22.0309   4
  -5  -5   0 401.478 23.5641   3
   5  -5   0 400.602 24.1360   1
  -5  -5   0 342.706 25.2771   2
   5  -5   0 339.994 23.0607   1
  -5   5   0 334.000 24.1164   1
  -5   5   0 389.595 24.0819   1
  -5   5   0 368.535 24.0147   3
   6  -5   0 1129.49 58.0509   4
  -6  -5   0 1081.46 60.8794   2
  -6  -5   0 1045.34 56.4491   1
  -6  -5   0 1123.56 58.9712   4
   6  -5   0 1087.54 60.7756   1
   6  -5   0 1117.60 61.2603   1
  -6  -5   0 1126.70 61.6034   3
  -6  -5   0 1019.48 56.4353   1
  -6   5   0 1149.82 62.2217   3
  -6   5   0 1200.21 61.8027   1
  -6   5   0 1090.20 62.3612   1
   7  -5   0 373.371 25.5606   1
  -7  -5   0 407.895 27.0121   3
  -7  -5   0 365.494 21.3731   1
   7  -5   0 392.167 21.9036   4
  -7  -5   0 399.923 25.9758   2
   7  -5   0 418.656 26.1000   1
  -7  -5   0 395.780 23.0284   4
  -7  -5   0 367.330 21.2322   1
  -7   5   0 420.623 26.5103   1
  -7   5   0 377.433 27.3034   3
  -7   5   0 373.490 27.3897   1
   8  -5   0 33.4287 8.97604   1
   8  -5   0 31.7322 6.91098   4
  -8  -5   0 30.8493 5.45513   1
  -8  -5   0 38.6682 10.3036   3
   8  -5   0 39.6726 9.51030   1
  -8  -5   0 36.3626 5.61775   4
  -8  -5   0 41.2892 9.57515   2
  -8  -5   0 30.3019 4.92882   1
  -8   5   0 8.96070 9.06242   3
  -8   5   0 28.7954 10.5347   1
  -8   5   0 26.9127 9.12644   1
  -9  -5   0 25.2627 10.4111   2
   9  -5   0 37.2943 5.42562   4
  -9  -5   0 51.8188 8.65674   1
   9  -5   0 35.2848 9.85286   1
  -9  -5   0 48.0565 11.5159   3
  -9  -5   0 41.3098 5.99411   4
  -9  -5   0 40.1864 7.31470   1
   9  -5   0 32.3020 9.46981   1
  -9   5   0 48.3879 11.0839   1
  -9   5   0 45.3315 12.2263   3
  -9   5   0 55.4812 13.6609   1
 -10  -5   0 37.8241 12.9155   3
  10  -5   0 39.1826 10.8155   1
  10  -5   0 55.5752 10.9303   1
 -10  -5   0 53.4094 14.4376   2
 -10  -5   0 49.8987 6.53817   4
 -10  -5   0 54.0662 10.7218   1
 -10  -5   0 70.0356 10.5490   1
 -10   5   0 66.3653 14.7567   3
 -10   5   0 72.3268 13.9938   1
  11  -5   0 -10.128 10.5749   1
 -11  -5   0 16.3244 8.37494   1
 -11  -5   0 34.6653 11.5419   1
 -11  -5   0 29.1062 16.8958   3
  11  -5   0 8.04733 9.21387   1
 -11   5   0 44.2344 13.8144   1
 -11   5   0 36.7767 14.4656   3
 -12  -5   0 118.309 19.7590   3
 -12  -5   0 115.279 18.0445   1
  12  -5   0 126.656 16.0664   1
 -12   5   0 77.9882 19.4106   3
 -12   5   0 86.7097 18.3544   1
 -13  -5   0 186.186 26.5357   1
 -13  -5   0 232.196 34.1264   3
 -13   5   0 170.178 25.4828   1
 -13   5   0 212.845 31.1920   3
 -14  -5   0 122.227 27.1686   3
 -14   5   0 94.6233 25.0550   1
 -14   5   0 59.7885 26.4619   3
   0  -6   0 941.661 46.8007   2
   0  -6   0 847.829 44.2712   3
   0  -6   0 912.171 46.1316   1
   0   6   0 790.469 45.9915   1
   0   6   0 902.569 46.8928   2
   0   6   0 786.393 45.5361   1
  -1  -6   0 1461.38 74.9196   3
  -1  -6   0 1437.84 76.5496   1
  -1  -6   0 1457.15 77.3339   2
  -1  -6   0 1437.90 76.0578   1
   1  -6   0 1541.36 78.0576   1
   1  -6   0 1471.40 77.1915   1
   1   6   0 1401.06 75.4048   1
   1   6   0 1514.82 77.6163   2
   1   6   0 1475.05 75.6800   1
  -1   6   0 1450.87 77.5190   1
  -1   6   0 1536.98 77.4318   2
  -1   6   0 1394.70 75.5524   3
  -1   6   0 1513.32 77.0914   1
  -2  -6   0 1582.76 83.8699   1
  -2  -6   0 1569.47 83.5516   1
  -2  -6   0 1599.54 85.7286   2
   2  -6   0 1653.20 86.5683   1
   2  -6   0 1570.80 85.6806   1
   2   6   0 1801.21 86.3005   2
  -2   6   0 1561.63 84.5054   3
  -2   6   0 1727.96 85.9216   1
  -2   6   0 1580.38 86.2384   1
   3  -6   0 1193.68 64.7691   1
   3  -6   0 1295.27 65.7596   1
  -3  -6   0 1177.50 64.5884   2
  -3   6   0 1220.13 64.7896   1
  -3   6   0 1185.72 63.9646   3
   3   6   0 1180.62 64.5754   2
  -3   6   0 1165.02 65.4751   1
  -4  -6   0 116.197 9.98167   3
   4  -6   0 119.347 12.1329   1
   4  -6   0 131.011 10.8370   1
   4   6   0 97.8702 10.0385   2
  -4   6   0 106.772 10.5738   1
  -4   6   0 76.0335 11.3641   1
  -4   6   0 99.3531 9.82971   3
  -5  -6   0 262.040 19.0706   2
   5  -6   0 281.654 19.9216   1
  -5  -6   0 269.094 17.7057   4
  -5  -6   0 249.769 18.4664   3
   5  -6   0 260.450 19.3781   1
  -5   6   0 300.370 19.7610   3
  -5   6   0 306.104 19.8515   1
  -5   6   0 266.101 20.3020   1
  -6  -6   0 275.960 18.5194   4
   6  -6   0 277.296 17.2998   4
   6  -6   0 275.931 20.3631   1
  -6  -6   0 293.878 20.7137   2
  -6  -6   0 274.329 20.2578   3
   6  -6   0 297.014 21.0447   1
  -6   6   0 305.490 21.5783   3
  -6   6   0 277.025 21.8562   1
  -6   6   0 312.822 21.2130   1
  -7  -6   0 460.160 25.6431   1
  -7  -6   0 503.103 28.6326   4
  -7  -6   0 496.420 31.3647   2
  -7  -6   0 466.430 25.6191   1
   7  -6   0 476.956 31.6233   1
   7  -6   0 446.362 30.8517   1
  -7  -6   0 518.898 32.1941   3
   7  -6   0 499.561 27.3498   4
  -7   6   0 507.742 32.2252   1
  -7   6   0 518.215 32.6900   3
  -7   6   0 484.577 33.7161   1
  -8  -6   0 178.221 13.1177   4
   8  -6   0 161.554 11.3714   4
   8  -6   0 173.612 17.5113   1
  -8  -6   0 157.815 17.5046   3
  -8  -6   0 142.857 11.2307   1
  -8  -6   0 150.126 10.7032   1
   8  -6   0 166.880 17.4101   1
  -8  -6   0 160.516 17.2112   2
  -8   6   0 177.018 18.8422   3
  -8   6   0 167.348 19.6642   1
  -8   6   0 176.780 17.2543   1
  -9  -6   0 40.7796 6.91863   1
   9  -6   0 42.3488 5.35448   4
  -9  -6   0 46.3326 12.5279   3
  -9  -6   0 32.6552 11.9757   2
   9  -6   0 37.3677 10.5278   1
   9  -6   0 25.4083 10.6203   1
  -9  -6   0 55.3953 8.76609   4
  -9   6   0 46.3470 11.6867   3
  -9   6   0 16.8355 14.4132   1
  -9   6   0 40.7321 11.0873   1
  10  -6   0 45.5632 5.95826   4
 -10  -6   0 60.3001 8.76658   4
 -10  -6   0 61.2309 9.60616   1
 -10  -6   0 35.8368 13.9840   2
 -10  -6   0 47.2220 13.5711   3
  10  -6   0 51.7635 11.7880   1
 -10  -6   0 48.4746 7.92662   1
  10  -6   0 39.1150 12.3062   1
 -10   6   0 65.8107 14.1529   1
 -10   6   0 69.6375 20.5348   3
 -11  -6   0 117.832 14.0578   1
 -11  -6   0 95.7971 21.4734   3
  11  -6   0 97.9185 15.0597   1
 -11  -6   0 94.5978 10.0716   4
  11  -6   0 129.154 20.5467   1
 -11  -6   0 99.7294 17.4218   1
 -11   6   0 76.0405 26.8408   1
 -11   6   0 98.1572 18.1683   3
 -12  -6   0 41.8238 16.7516   3
 -12  -6   0 26.9589 11.2059   1
  12  -6   0 34.6849 12.1961   1
 -12   6   0 71.7128 18.3666   3
 -12   6   0 29.7320 15.4141   1
 -13  -6   0 33.1702 19.3759   3
 -13   6   0 70.9387 21.6745   3
 -13   6   0 40.2180 19.7830   1
 -14  -6   0 112.982 27.6963   3
 -14   6   0 74.9106 28.4082   3
 -14   6   0 90.7837 24.5866   1
   0  -7   0 -2.4260 2.87526   1
   0  -7   0 2.20689 3.95216   1
   0   7   0 1.77208 3.62896   2
   0   7   0 -0.4968 1.01238   3
   0   7   0 -0.3969 3.19608   1
   0   7   0 1.26438 3.47632   1
  -1  -7   0 124.743 8.69984   1
   1  -7   0 140.400 11.0282   1
  -1  -7   0 124.774 10.0558   2
   1  -7   0 128.483 9.84500   1
  -1  -7   0 108.588 9.34145   1
  -1  -7   0 130.254 6.57847   3
   1   7   0 110.634 7.66202   1
  -1   7   0 129.770 10.5928   1
  -1   7   0 127.656 10.2124   2
   1   7   0 102.209 7.93750   1
   1   7   0 110.886 10.2238   2
  -1   7   0 120.090 9.66030   1
  -1   7   0 108.714 7.52453   3
   2  -7   0 1442.49 78.3573   1
  -2  -7   0 1435.13 76.1790   1
  -2  -7   0 1463.35 78.4200   2
   2  -7   0 1577.61 79.5761   1
  -2  -7   0 1443.83 76.6518   1
  -2   7   0 1384.25 78.6922   1
  -2   7   0 1455.91 77.8214   3
   2   7   0 1541.32 78.8191   2
  -2   7   0 1513.94 78.3522   1
   3  -7   0 2126.84 110.683   1
  -3  -7   0 1995.57 106.412   1
   3  -7   0 2020.23 109.620   1
  -3  -7   0 2023.56 106.665   1
   3   7   0 2195.81 109.884   2
  -3   7   0 2169.88 109.871   1
  -3   7   0 1983.85 110.407   1
  -3   7   0 2147.28 108.684   3
   4  -7   0 180.110 15.6632   1
  -4  -7   0 177.629 13.2826   3
   4  -7   0 170.350 14.9354   1
  -4  -7   0 184.710 14.6360   2
  -4   7   0 194.328 15.0771   1
  -4   7   0 162.817 15.3732   1
  -4   7   0 186.274 13.9280   3
   4   7   0 222.780 14.9470   2
  -5  -7   0 114.130 11.4843   3
   5  -7   0 137.359 13.8855   1
  -5  -7   0 111.939 11.0734   4
   5  -7   0 126.594 12.7703   1
  -5  -7   0 128.097 12.7799   2
  -5   7   0 127.434 12.6540   3
   5   7   0 157.180 12.7620   2
  -5   7   0 137.673 14.4993   1
  -5   7   0 140.011 13.5032   1
  -6  -7   0 334.812 24.4612   2
   6  -7   0 375.286 25.3579   1
  -6  -7   0 348.177 24.1664   3
   6  -7   0 325.495 24.2585   1
  -6  -7   0 346.212 22.8582   4
  -6   7   0 380.153 25.1083   3
  -6   7   0 382.152 27.1187   1
  -6   7   0 382.442 25.1330   1
   7  -7   0 40.7544 5.84544   4
  -7  -7   0 45.4487 7.39336   4
   7  -7   0 34.3269 9.32597   1
   7  -7   0 34.2495 9.78556   1
  -7  -7   0 33.1568 9.58890   2
  -7  -7   0 43.2908 9.41804   3
  -7   7   0 15.3288 8.76858   1
  -7   7   0 25.8241 10.7170   1
  -7   7   0 26.8424 9.23647   3
  -8  -7   0 2.88946 8.91084   3
   8  -7   0 -7.3937 9.36444   1
  -8  -7   0 2.34917 10.0414   2
  -8  -7   0 8.28571 5.74593   4
   8  -7   0 3.63261 4.46867   4
   8  -7   0 1.31264 9.23144   1
  -8  -7   0 7.08632 2.88257   1
  -8  -7   0 7.67105 3.14403   1
  -8   7   0 -7.3006 8.82697   1
  -8   7   0 9.89473 12.6570   1
   9  -7   0 26.4132 5.38027   4
   9  -7   0 25.6635 11.9860   1
  -9  -7   0 31.2415 5.05257   1
  -9  -7   0 29.9453 5.91676   1
  -9  -7   0 2.38720 10.6197   3
  -9  -7   0 20.6714 12.6460   2
  -9  -7   0 21.9573 6.69377   4
   9  -7   0 16.7260 11.1564   1
  -9   7   0 22.4810 11.3068   3
  -9   7   0 17.9603 10.6502   1
  10  -7   0 56.5018 14.1294   1
 -10  -7   0 70.9723 11.5234   1
 -10  -7   0 37.6285 14.2167   3
  10  -7   0 78.8677 13.9620   1
 -10  -7   0 60.3127 17.7503   2
 -10  -7   0 70.3118 9.66353   1
  10  -7   0 61.6847 8.06964   4
 -10  -7   0 61.4612 8.72833   4
 -10   7   0 44.6838 13.6562   1
  11  -7   0 103.175 17.6896   1
 -11  -7   0 75.2286 19.4983   3
 -11  -7   0 66.3748 12.3863   1
 -11  -7   0 105.222 12.6265   1
 -11  -7   0 80.1217 11.5439   4
  11  -7   0 56.7676 14.8638   1
 -11   7   0 97.5137 19.5091   3
 -11   7   0 107.749 19.1632   1
 -12  -7   0 24.9299 10.7379   1
 -12  -7   0 10.6493 17.3515   3
  12  -7   0 35.5747 14.3617   1
 -12   7   0 31.6071 16.6011   3
 -12   7   0 2.13389 15.7640   1
 -13  -7   0 44.8521 21.2550   3
 -13   7   0 81.5238 23.1322   3
 -13   7   0 74.8235 20.7726   1
 -14  -7   0 18.8159 24.5527   3
 -14   7   0 27.8327 24.4085   1
 -14   7   0 30.4822 29.5122   3
   0  -8   0 527.847 32.9662   1
   0  -8   0 581.799 34.1378   1
   0   8   0 616.857 34.4048   2
   0   8   0 615.317 32.8882   1
   0   8   0 619.021 33.4588   1
   1  -8   0 176.967 13.9094   1
   1  -8   0 216.871 15.5124   1
  -1  -8   0 201.172 13.9417   1
  -1  -8   0 189.984 12.7250   1
  -1  -8   0 188.186 15.7587   2
   1   8   0 185.875 14.5604   2
   1   8   0 197.095 12.1641   1
  -1   8   0 198.112 14.0173   1
  -1   8   0 174.016 14.2144   1
  -1   8   0 202.298 14.4831   2
  -1   8   0 187.416 11.2964   3
   1   8   0 195.177 11.7170   1
  -2  -8   0 325.806 19.3621   1
   2  -8   0 351.253 22.8606   1
   2  -8   0 311.853 21.3923   1
  -2  -8   0 314.629 19.9909   1
  -2  -8   0 308.705 21.4334   2
   2   8   0 376.468 22.4138   2
  -2   8   0 337.177 19.5976   3
  -2   8   0 312.186 23.7807   1
  -2   8   0 383.038 21.9647   1
  -2   8   0 373.631 21.9322   2
  -3  -8   0 650.396 35.8575   1
   3  -8   0 672.695 39.7702   1
  -3  -8   0 624.241 35.9690   3
  -3  -8   0 661.597 38.5928   2
  -3  -8   0 650.067 35.3918   1
   3  -8   0 637.881 38.5850   1
  -3   8   0 715.699 38.8917   1
  -3   8   0 699.973 37.3165   3
   3   8   0 722.574 39.1649   2
  -3   8   0 656.969 39.6293   1
  -4  -8   0 266.544 18.5739   2
   4  -8   0 246.531 18.1634   1
  -4  -8   0 249.292 13.2053   1
  -4  -8   0 246.778 13.4511   1
   4  -8   0 259.616 19.9667   1
  -4  -8   0 267.876 16.3084   3
   4   8   0 195.393 17.1228   2
  -4   8   0 227.732 18.9396   1
  -4   8   0 213.872 16.6966   3
  -4   8   0 229.116 18.3162   1
  -5  -8   0 226.559 18.8221   2
  -5  -8   0 244.430 17.3154   3
  -5  -8   0 221.853 17.9057   4
   5  -8   0 269.407 21.0762   1
   5  -8   0 244.846 19.2454   1
   5   8   0 272.026 18.9948   2
  -5   8   0 264.804 18.6361   3
  -5   8   0 293.157 20.1440   1
  -5   8   0 235.685 20.3890   1
  -6  -8   0 366.198 23.0228   3
   6  -8   0 334.962 25.1790   1
  -6  -8   0 345.861 22.0629   4
   6  -8   0 340.127 23.8412   1
  -6  -8   0 340.511 23.7469   2
  -6   8   0 313.437 24.1184   1
  -6   8   0 267.124 24.5445   1
  -6   8   0 283.541 22.7461   3
  -7  -8   0 23.1204 8.89977   2
   7  -8   0 7.74382 9.54419   1
   7  -8   0 6.69456 9.00047   1
   7  -8   0 5.34641 5.79000   4
  -7  -8   0 3.05876 6.79114   3
  -7  -8   0 11.9371 6.57230   4
  -7   8   0 4.03250 9.27162   1
  -7   8   0 22.7551 11.1081   1
  -7   8   0 14.3561 8.41666   3
   8  -8   0 130.382 18.1053   1
  -8  -8   0 133.956 7.90835   1
  -8  -8   0 141.457 18.1429   2
  -8  -8   0 161.347 14.1039   4
  -8  -8   0 128.172 17.4262   3
   8  -8   0 122.127 12.0807   4
   8  -8   0 124.858 18.0257   1
  -8  -8   0 125.781 7.98748   1
  -8   8   0 102.949 16.8956   3
  -8   8   0 132.418 22.2664   1
  -8   8   0 134.605 17.1430   1
  -9  -8   0 78.7958 7.47061   1
   9  -8   0 100.862 15.7505   1
  -9  -8   0 76.6793 10.4296   4
  -9  -8   0 83.9426 8.57949   1
   9  -8   0 89.8152 15.4025   1
  -9  -8   0 93.7960 16.2613   2
  -9  -8   0 86.1951 14.1738   3
   9  -8   0 70.3394 10.0230   4
  -9   8   0 101.188 16.3412   1
  -9   8   0 88.7935 15.4893   3
  10  -8   0 259.308 27.3313   1
  10  -8   0 265.150 17.0323   4
 -10  -8   0 249.835 17.9924   1
 -10  -8   0 257.437 19.1640   4
 -10  -8   0 255.027 25.0053   3
  10  -8   0 273.705 25.3584   1
 -10  -8   0 220.498 16.2240   1
 -10   8   0 249.780 30.4376   1
 -10   8   0 236.974 37.8355   3
  11  -8   0 118.845 17.6884   1
 -11  -8   0 128.092 14.3935   4
 -11  -8   0 104.114 23.3128   3
  11  -8   0 111.751 20.3528   1
 -11  -8   0 127.929 14.0130   1
 -11   8   0 131.415 21.2238   3
 -11   8   0 143.221 24.8453   1
  12  -8   0 78.6970 17.1158   1
 -12  -8   0 71.5389 18.5834   3
 -12   8   0 108.228 21.8927   3
 -12   8   0 85.3175 20.4685   1
  13  -8   0 40.0411 18.9163   1
 -13  -8   0 63.2288 22.8193   3
 -13   8   0 61.5357 23.2533   3
 -13   8   0 25.9975 19.8776   1
   0  -9   0 1.73628 5.07359   1
   0  -9   0 -2.0967 3.75114   1
   0   9   0 -2.7605 3.41096   1
   0   9   0 2.47907 5.06701   2
   0   9   0 2.29094 3.99937   1
  -1  -9   0 817.911 49.8676   2
  -1  -9   0 932.334 49.9705   1
   1  -9   0 948.223 51.3087   1
   1  -9   0 853.631 49.8048   1
  -1  -9   0 869.348 48.7435   1
  -1   9   0 958.068 49.6579   1
  -1   9   0 963.606 50.7170   2
  -1   9   0 877.869 50.1207   1
   1   9   0 877.797 47.5924   1
   1   9   0 928.940 48.0644   1
  -1   9   0 870.225 47.0211   3
   1   9   0 925.778 50.7316   2
   2  -9   0 998.329 55.1634   1
  -2  -9   0 941.210 51.7060   1
  -2  -9   0 934.995 53.8354   2
  -2  -9   0 907.152 50.0684   3
  -2  -9   0 991.859 53.8844   1
  -2  -9   0 959.440 50.0690   3
   2  -9   0 915.020 53.6903   1
  -2   9   0 926.287 51.5573   3
  -2   9   0 1032.89 53.8668   1
  -2   9   0 1065.35 54.3794   2
   2   9   0 1050.16 54.7837   2
  -2   9   0 940.042 54.4518   1
   3  -9   0 515.276 32.5667   1
  -3  -9   0 548.665 32.7030   2
  -3  -9   0 539.229 30.0520   1
  -3  -9   0 542.880 29.3599   1
   3  -9   0 597.147 34.3697   1
  -3  -9   0 521.264 29.2465   3
   3   9   0 537.555 32.8514   2
  -3   9   0 548.640 30.6711   3
  -3   9   0 486.247 33.0377   1
  -3   9   0 529.538 32.3183   1
  -4  -9   0 381.549 26.1380   2
  -4  -9   0 389.394 22.2880   1
  -4  -9   0 405.433 23.6420   3
   4  -9   0 367.401 26.0681   1
   4  -9   0 386.473 27.9627   1
  -4  -9   0 380.582 21.7528   1
  -4   9   0 435.335 26.6641   1
  -4   9   0 387.740 27.3626   1
  -4   9   0 457.385 25.2993   3
   4   9   0 405.550 26.3866   2
  -5  -9   0 248.817 19.2821   2
  -5  -9   0 228.685 12.1697   1
  -5  -9   0 226.819 17.3077   4
  -5  -9   0 252.881 16.1010   3
   5  -9   0 242.792 19.9170   1
   5  -9   0 205.835 18.3120   1
  -5  -9   0 225.631 12.3727   1
  -5   9   0 183.329 19.6419   1
  -5   9   0 189.890 17.9046   1
  -5   9   0 213.490 16.9266   3
   5   9   0 183.026 17.3024   2
   6  -9   0 87.9776 14.8515   1
  -6  -9   0 70.0998 11.2205   4
  -6  -9   0 54.2245 8.95278   3
  -6  -9   0 60.0584 11.0963   2
   6  -9   0 43.8094 11.3900   1
  -6   9   0 50.2493 10.1348   3
  -6   9   0 45.9389 10.6797   1
  -6   9   0 52.2731 13.1914   1
   7  -9   0 150.716 20.0469   1
  -7  -9   0 191.325 16.8604   3
   7  -9   0 161.065 14.2997   4
  -7  -9   0 198.765 20.6595   2
   7  -9   0 208.067 20.9805   1
  -7  -9   0 193.429 16.6980   4
  -7   9   0 186.814 18.4923   3
  -7   9   0 189.340 23.2314   1
  -7   9   0 194.638 19.1166   1
   8  -9   0 21.4309 12.9802   1
   8  -9   0 21.5447 12.8118   1
  -8  -9   0 23.3403 13.1526   2
  -8  -9   0 32.9594 10.3957   3
  -8  -9   0 39.0840 8.74991   4
   8  -9   0 37.7762 7.19433   4
  -8   9   0 46.6329 12.1661   1
  -8   9   0 31.3838 12.0649   3
  -9  -9   0 452.616 32.8989   3
   9  -9   0 420.233 27.3625   4
   9  -9   0 439.674 34.1790   1
  -9  -9   0 390.832 33.4125   2
   9  -9   0 474.882 33.8168   1
  -9  -9   0 410.651 23.5637   1
  -9  -9   0 424.314 28.4615   4
  -9  -9   0 405.161 23.0875   1
  -9   9   0 450.140 33.4564   3
  -9   9   0 459.683 34.4693   1
  10  -9   0 63.6155 16.5358   1
 -10  -9   0 53.3211 6.71713   1
 -10  -9   0 82.6730 13.7225   4
 -10  -9   0 61.3259 14.5852   3
 -10  -9   0 72.8681 9.96633   1
  10  -9   0 49.3580 11.6214   4
 -10   9   0 52.1828 16.0483   1
 -10   9   0 62.6259 15.3908   3
 -11  -9   0 310.065 23.4098   4
  11  -9   0 308.662 31.8304   1
  11  -9   0 303.430 24.5337   4
 -11  -9   0 311.125 36.2629   3
 -11   9   0 318.190 33.1966   3
 -11   9   0 350.842 33.0235   1
 -12  -9   0 63.4610 19.5105   3
  12  -9   0 105.582 23.0497   1
 -12   9   0 108.725 21.9705   1
 -12   9   0 71.0071 21.5778   3
 -13  -9   0 6.61496 22.7538   3
  13  -9   0 15.1020 18.5656   1
 -13   9   0 3.64148 23.0489   3
 -13   9   0 39.8960 21.5031   1
   0 -10   0 140.459 14.0045   1
   0 -10   0 125.238 11.8664   1
   0  10   0 154.621 12.1936   1
   0  10   0 131.888 13.3221   2
   0  10   0 138.129 11.0769   1
  -1 -10   0 238.861 16.8206   1
   1 -10   0 263.574 19.3808   1
  -1 -10   0 233.520 18.1640   2
  -1 -10   0 273.154 18.2733   1
   1 -10   0 243.960 17.8320   1
   1  10   0 245.819 15.7685   1
  -1  10   0 237.266 14.2919   3
   1  10   0 279.536 18.8188   2
  -1  10   0 247.707 20.0983   1
  -1  10   0 261.296 18.8948   2
  -1  10   0 260.806 17.5091   1
   2 -10   0 81.7635 12.2522   1
  -2 -10   0 81.9044 4.58152   3
  -2 -10   0 93.8549 10.3064   1
  -2 -10   0 82.2463 4.64601   3
  -2 -10   0 78.6206 10.4351   2
   2 -10   0 77.6744 11.1990   1
  -2 -10   0 68.0615 8.26783   1
  -2  10   0 64.3145 9.67637   1
  -2  10   0 67.2003 10.1543   2
  -2  10   0 61.9180 7.80850   3
  -2  10   0 63.4978 11.2879   1
   2  10   0 67.8277 10.7301   2
  -3 -10   0 377.458 22.6475   3
   3 -10   0 410.747 28.4050   1
   3 -10   0 398.495 26.9030   1
  -3 -10   0 398.166 23.5863   1
  -3 -10   0 386.468 26.6733   2
  -3  10   0 432.516 26.8205   2
  -3  10   0 443.947 27.3198   1
   3  10   0 424.250 27.3421   2
  -3  10   0 450.359 24.7221   3
  -3  10   0 398.249 27.7108   1
   4 -10   0 308.105 23.5801   1
  -4 -10   0 277.276 19.3477   3
  -4 -10   0 283.207 20.9816   2
  -4 -10   0 290.278 16.2800   1
  -4 -10   0 289.094 17.1271   1
   4 -10   0 253.256 20.8779   1
  -4  10   0 257.716 22.4285   1
   4  10   0 239.200 20.1963   2
  -4  10   0 249.718 20.3013   1
  -4  10   0 268.810 18.7901   3
   5 -10   0 135.832 16.2531   1
  -5 -10   0 123.672 8.97790   1
  -5 -10   0 136.533 11.4495   3
  -5 -10   0 113.839 8.24154   1
   5 -10   0 101.110 15.8854   1
  -5 -10   0 100.383 14.7112   2
  -5 -10   0 119.805 14.3799   4
  -5  10   0 110.299 17.4739   1
  -5  10   0 130.763 13.5503   3
  -5  10   0 153.236 15.3629   1
   5  10   0 122.250 14.3410   2
  -6 -10   0 79.4547 11.6202   4
  -6 -10   0 62.9469 4.82595   1
  -6 -10   0 54.3581 11.4896   2
   6 -10   0 60.4851 13.5261   1
   6 -10   0 55.8218 12.4340   1
  -6 -10   0 62.5394 9.42176   3
  -6 -10   0 64.7089 5.33958   1
  -6  10   0 61.3900 10.8984   3
   6  10   0 37.6369 10.6178   2
  -6  10   0 43.5564 11.5645   1
  -7 -10   0 120.394 17.1527   2
  -7 -10   0 79.5018 13.8658   3
   7 -10   0 109.065 17.4135   1
  -7 -10   0 82.4977 13.8223   4
   7 -10   0 88.6768 15.1334   1
  -7  10   0 104.006 15.0914   3
  -7  10   0 98.0427 16.0040   1
  -8 -10   0 191.259 20.5064   3
   8 -10   0 227.507 17.0307   4
  -8 -10   0 185.562 22.9382   2
  -8 -10   0 184.448 18.6809   4
   8 -10   0 209.617 22.7395   1
   8 -10   0 194.337 25.2774   1
  -8  10   0 220.481 23.2759   1
  -8  10   0 242.217 21.9213   3
  -9 -10   0 79.3842 14.6380   3
   9 -10   0 70.7828 10.0166   4
  -9 -10   0 68.0588 11.5684   4
   9 -10   0 76.8826 17.1808   1
  -9  10   0 71.5058 15.1827   3
  -9  10   0 56.8053 15.1396   1
 -10 -10   0 324.990 19.8965   1
 -10 -10   0 372.591 26.4072   4
  10 -10   0 358.913 30.8986   4
 -10 -10   0 329.299 20.6324   1
 -10  10   0 420.823 32.5264   3
 -10  10   0 384.418 32.9779   1
 -11 -10   0 101.746 17.2093   4
  11 -10   0 107.737 19.9590   1
 -11 -10   0 86.6844 22.1064   3
 -11  10   0 129.050 21.7655   3
 -11  10   0 97.2503 20.9129   1
  12 -10   0 89.4446 19.4879   1
 -12 -10   0 25.7526 19.0053   3
 -12  10   0 46.8490 20.7114   1
 -12  10   0 36.6904 21.0258   3
 -13 -10   0 87.5817 25.0191   3
  13 -10   0 61.1794 22.3253   1
 -13  10   0 127.770 27.0586   1
 -13  10   0 115.115 28.1804   3
   0 -11   0 4.62552 6.94900   1
   0 -11   0 -0.2022 5.60804   1
   0  11   0 1.95514 4.83543   1
   0  11   0 -11.591 5.98551   2
   0  11   0 6.03801 4.50307   1
  -1 -11   0 630.407 36.7350   1
  -1 -11   0 550.553 34.9701   1
   1 -11   0 569.805 36.1845   1
   1 -11   0 600.176 37.4876   1
  -1  11   0 653.522 35.8378   1
   1  11   0 640.792 33.9050   1
   1  11   0 603.027 37.2044   2
  -1  11   0 633.193 37.2600   2
  -1  11   0 593.557 32.2156   3
  -1  11   0 600.944 36.5317   1
   1  11   0 617.937 33.8526   1
   2 -11   0 666.291 39.9741   1
  -2 -11   0 681.212 37.6060   1
   2 -11   0 578.910 38.0573   1
  -2 -11   0 609.829 36.1438   1
  -2 -11   0 600.163 38.1477   2
  -2  11   0 683.910 38.1307   1
  -2  11   0 641.675 38.7655   1
  -2  11   0 642.690 38.6197   2
   2  11   0 705.034 39.4524   2
  -2  11   0 587.683 35.6953   3
   3 -11   0 679.646 42.1029   1
  -3 -11   0 694.727 36.6330   3
  -3 -11   0 693.024 38.5123   1
  -3 -11   0 693.663 41.7099   2
  -3 -11   0 729.930 39.7931   1
   3 -11   0 758.009 44.0371   1
  -3 -11   0 693.808 36.6199   3
  -3  11   0 608.704 42.2716   1
  -3  11   0 710.212 41.5864   1
   3  11   0 687.076 41.9521   2
  -3  11   0 690.023 38.6355   3
  -3  11   0 698.733 41.5143   2
  -4 -11   0 141.168 16.3915   2
   4 -11   0 181.214 18.4483   1
  -4 -11   0 151.481 11.5132   1
   4 -11   0 150.594 16.7815   1
  -4  11   0 173.535 16.1350   2
  -4  11   0 174.329 14.1752   3
   4  11   0 148.703 16.2243   2
  -4  11   0 157.571 17.9268   1
  -4  11   0 180.830 17.1914   1
  -5 -11   0 742.592 40.9410   1
  -5 -11   0 824.399 42.3365   3
   5 -11   0 821.317 47.7751   1
   5 -11   0 732.430 46.4064   1
  -5 -11   0 726.546 45.1617   4
  -5 -11   0 749.096 45.8375   2
  -5 -11   0 737.641 40.2700   1
  -5  11   0 735.082 43.7088   3
  -5  11   0 684.484 46.9147   1
   5  11   0 734.694 45.3158   2
  -5  11   0 784.989 46.3529   1
  -6 -11   0 11.0741 4.15870   1
  -6 -11   0 18.4030 3.55948   1
   6 -11   0 7.36583 11.6101   1
  -6 -11   0 15.8359 8.63240   4
   6 -11   0 25.3878 11.5825   1
  -6 -11   0 2.23298 9.87513   2
  -6 -11   0 16.8021 10.0187   3
  -6  11   0 0.12049 7.99134   3
   6  11   0 2.05791 8.41324   2
  -6  11   0 8.00346 14.6963   1
  -6  11   0 8.78194 9.15802   1
  -7 -11   0 34.5286 9.46655   3
   7 -11   0 60.9960 17.0823   1
  -7 -11   0 48.3143 5.45015   1
  -7 -11   0 38.5369 4.53358   1
  -7 -11   0 33.6964 9.74682   4
   7 -11   0 24.6467 13.0649   1
  -7 -11   0 51.0725 13.8950   2
  -7  11   0 36.3335 12.1679   1
  -7  11   0 30.7759 10.5892   3
  -8 -11   0 99.2829 16.4304   3
  -8 -11   0 88.1483 13.5258   4
   8 -11   0 71.4012 17.3657   1
   8 -11   0 89.8059 13.9277   4
  -8  11   0 86.9241 15.0718   3
  -9 -11   0 261.251 24.0930   4
   9 -11   0 267.800 22.0752   4
  -9 -11   0 279.612 25.5480   3
  -9  11   0 341.512 28.5319   1
  -9  11   0 315.687 27.1551   3
 -10 -11   0 53.7158 15.2809   3
  10 -11   0 63.6990 16.8397   1
 -10 -11   0 67.2370 12.8296   4
 -10  11   0 65.8250 15.8847   3
 -10  11   0 75.4168 17.5820   1
  11 -11   0 109.985 21.1157   1
 -11 -11   0 130.010 19.6963   4
 -11 -11   0 58.9893 22.3036   3
 -11  11   0 125.633 21.0350   3
 -11  11   0 173.249 28.6828   1
  12 -11   0 35.8960 19.7888   1
 -12 -11   0 31.0232 20.5290   3
 -12  11   0 19.2965 20.2224   3
 -12  11   0 13.8323 21.0001   1
   0 -12   0 255.884 20.7077   1
   0 -12   0 288.014 22.5134   1
   0  12   0 302.737 22.3348   2
   0  12   0 307.928 20.3450   1
   0  12   0 297.188 19.3897   1
   1 -12   0 155.247 16.7899   1
   1 -12   0 144.112 15.3844   1
  -1 -12   0 156.639 13.9592   1
  -1 -12   0 146.602 15.4514   1
   1  12   0 154.639 11.7591   1
   1  12   0 159.385 11.3489   1
  -1  12   0 149.245 9.10631   3
  -1  12   0 119.713 14.7678   1
   1  12   0 153.837 15.6654   2
  -1  12   0 152.675 15.5314   2
  -1  12   0 129.593 13.5000   1
  -2 -12   0 50.9029 7.96849   1
  -2 -12   0 69.1107 10.3240   2
   2 -12   0 33.5729 9.36104   1
  -2 -12   0 55.6793 9.60055   1
   2 -12   0 46.1853 11.1586   1
  -2  12   0 55.5762 7.44418   3
  -2  12   0 67.7752 11.6391   1
   2  12   0 67.3670 10.9297   2
  -2  12   0 66.0322 10.5591   1
  -2  12   0 71.1349 10.9294   2
  -3 -12   0 598.293 33.3675   1
  -3 -12   0 515.151 28.4951   3
  -3 -12   0 507.284 32.6768   1
   3 -12   0 515.738 35.2091   1
  -3 -12   0 522.487 28.5260   3
  -3 -12   0 552.755 35.2796   2
   3 -12   0 592.356 37.3427   1
  -3  12   0 563.392 34.7071   1
  -3  12   0 576.564 31.6270   3
  -3  12   0 602.117 35.5634   2
  -3  12   0 508.153 35.5555   1
   3  12   0 568.242 35.7707   2
   4 -12   0 1127.05 63.7558   1
  -4 -12   0 1128.54 58.7974   1
   4 -12   0 1010.11 61.7012   1
  -4 -12   0 1088.73 57.5865   1
  -4 -12   0 977.580 56.2867   3
  -4 -12   0 1052.37 61.7614   2
   4  12   0 1102.16 62.1176   2
  -4  12   0 964.261 62.6970   1
  -4  12   0 1093.61 61.4890   2
  -4  12   0 1113.74 61.6502   1
  -4  12   0 1127.58 58.9552   3
  -5 -12   0 83.4610 10.0418   3
   5 -12   0 86.8283 15.4875   1
  -5 -12   0 76.5714 13.1166   4
  -5 -12   0 85.2543 8.98220   1
  -5 -12   0 76.1365 13.6165   2
  -5  12   0 90.0562 16.6132   1
  -5  12   0 100.247 14.8160   1
   5  12   0 83.6935 13.5961   2
  -5  12   0 94.2040 12.5975   3
  -6 -12   0 74.9086 11.5822   3
  -6 -12   0 68.5914 7.96026   1
   6 -12   0 90.6957 16.6779   1
   6 -12   0 68.3554 24.1774   1
  -6 -12   0 67.5735 14.3729   2
  -6 -12   0 67.8414 12.5940   4
  -6 -12   0 60.7258 8.87419   1
   6  12   0 64.6778 13.3967   2
  -6  12   0 86.6372 14.6465   3
  -6  12   0 84.5174 14.4904   1
  -7 -12   0 8.22853 4.62386   1
  -7 -12   0 14.6986 3.86131   1
   7 -12   0 -12.971 12.0279   1
  -7 -12   0 9.56507 10.1391   4
  -7 -12   0 10.7822 8.16937   3
  -7  12   0 11.6781 11.1989   1
  -7  12   0 0.59595 9.69467   3
  -8 -12   0 98.0420 14.8557   4
  -8 -12   0 109.617 8.22271   1
  -8 -12   0 98.4504 16.4423   3
  -8 -12   0 103.380 7.65410   1
   8 -12   0 95.3751 15.5072   4
  -8  12   0 137.217 20.1343   3
  -8  12   0 120.959 19.7185   1
   9 -12   0 83.5939 18.8606   1
   9 -12   0 109.089 16.8987   4
  -9 -12   0 112.568 18.3029   4
  -9 -12   0 104.130 16.0021   3
  -9  12   0 62.7079 16.7614   3
  -9  12   0 83.1935 17.6430   1
  10 -12   0 194.582 28.8315   1
 -10 -12   0 200.602 25.3945   3
 -10  12   0 220.170 28.6409   3
 -10  12   0 207.446 26.9056   1
  11 -12   0 18.1601 18.9937   1
 -11 -12   0 45.6668 21.0148   3
 -11 -12   0 20.7723 12.4742   4
 -11  12   0 26.3994 17.2941   3
 -11  12   0 60.9162 19.5092   1
 -12 -12   0 2.56160 19.8806   3
 -12  12   0 0.67549 22.8128   1
 -12  12   0 2.47988 19.9227   3
   0 -13   0 2.45313 7.55235   1
   0 -13   0 -5.9380 8.11113   1
   0  13   0 3.65546 7.65516   2
   0  13   0 -0.5938 6.26486   1
   0  13   0 1.33914 5.62465   1
  -1 -13   0 19.8390 7.54712   1
  -1 -13   0 8.39387 8.23500   1
   1 -13   0 -5.1923 9.26002   1
   1 -13   0 4.76951 9.06109   1
   1  13   0 22.4436 5.44089   1
  -1  13   0 26.7879 9.46130   2
   1  13   0 14.6708 8.91450   2
  -1  13   0 32.0664 7.56425   1
   1  13   0 22.4858 5.28623   1
  -1  13   0 13.4554 8.29577   1
   2 -13   0 125.070 18.5922   1
  -2 -13   0 145.414 15.6100   1
  -2 -13   0 109.005 15.7771   2
   2 -13   0 111.573 15.7705   1
  -2 -13   0 139.781 14.0806   1
  -2  13   0 142.789 10.1620   3
  -2  13   0 146.840 16.3780   2
  -2  13   0 134.849 17.4262   1
   2  13   0 146.376 16.7314   2
  -2  13   0 137.316 15.1797   1
   3 -13   0 827.342 51.1207   1
   3 -13   0 757.269 49.0281   1
  -3 -13   0 887.451 47.2268   1
  -3 -13   0 815.176 48.7995   2
  -3 -13   0 745.542 46.9040   1
  -3  13   0 815.042 48.7670   2
  -3  13   0 826.005 44.3663   3
   3  13   0 837.635 49.2888   2
  -3  13   0 807.843 48.2098   1
  -3  13   0 726.720 49.1374   1
   4 -13   0 29.8730 12.8652   1
  -4 -13   0 27.1989 4.07524   3
  -4 -13   0 30.6631 5.27074   3
  -4 -13   0 34.2913 7.95804   1
  -4 -13   0 10.1887 10.8993   2
  -4  13   0 38.8567 10.4349   2
  -4  13   0 22.7230 9.61645   1
  -4  13   0 21.2309 12.2027   1
  -4  13   0 35.9803 7.55669   3
   4  13   0 18.8017 10.0427   2
   5 -13   0 426.061 33.7086   1
  -5 -13   0 409.697 24.9753   1
  -5 -13   0 416.596 26.3370   1
  -5 -13   0 385.275 31.1315   2
  -5 -13   0 415.666 24.5540   3
  -5 -13   0 408.532 30.7031   4
  -5  13   0 441.177 31.4794   1
  -5  13   0 408.254 27.5600   3
  -5  13   0 344.981 32.4688   1
   5  13   0 425.294 30.4356   2
  -5  13   0 453.767 30.8054   2
  -6 -13   0 38.4770 11.6805   4
  -6 -13   0 45.7378 7.92987   3
   6 -13   0 45.6989 14.8518   1
  -6 -13   0 41.0033 6.59391   1
  -6  13   0 33.4384 11.8746   1
  -6  13   0 51.4141 11.7451   2
  -6  13   0 45.3627 10.4429   3
   6  13   0 46.6369 12.6633   2
  -7 -13   0 283.156 24.0350   4
  -7 -13   0 232.277 16.4355   1
  -7 -13   0 226.765 15.4172   1
  -7 -13   0 254.267 20.2003   3
  -7  13   0 206.108 29.2403   1
  -7  13   0 211.924 27.6358   3
  -8 -13   0 153.190 11.0668   1
  -8 -13   0 149.520 11.6261   1
  -8 -13   0 174.835 21.2159   4
  -8 -13   0 139.034 19.0166   3
   8 -13   0 148.738 19.3767   4
   8 -13   0 159.852 23.8734   1
  -8  13   0 192.013 24.3749   1
  -8  13   0 174.740 22.0061   3
   9 -13   0 31.9901 17.4740   1
  -9 -13   0 26.0770 12.2971   4
  -9 -13   0 45.3594 12.9552   3
   9 -13   0 16.5884 12.1224   4
  -9  13   0 20.4808 14.7634   1
  10 -13   0 61.4664 19.8299   1
 -10 -13   0 79.9773 15.1209   4
 -10 -13   0 74.8721 16.9837   3
 -10  13   0 38.7081 18.2100   1
 -10  13   0 27.9754 16.0865   3
 -11 -13   0 -44.843 21.6734   3
  11 -13   0 3.12485 19.3860   1
 -11 -13   0 -6.4180 13.6393   4
 -11  13   0 -2.6153 18.6896   3
 -11  13   0 -7.6407 19.0294   1
 -12 -13   0 37.1293 22.6272   3
 -12  13   0 28.6377 22.2677   3
 -12  13   0 50.5770 26.9970   1
   0 -14   0 537.518 34.7495   1
   0 -14   0 480.196 32.5816   1
   0  14   0 465.182 29.8644   1
   0  14   0 496.578 33.8874   2
  -1 -14   0 185.966 18.2906   1
   1 -14   0 201.720 22.1040   1
  -1 -14   0 186.576 20.0382   1
   1 -14   0 175.983 20.3041   1
   1  14   0 212.818 15.0988   1
  -1  14   0 205.222 17.5561   1
  -1  14   0 200.838 19.2228   1
   1  14   0 214.874 20.6586   2
  -1  14   0 232.028 20.5608   2
   1  14   0 208.090 14.4092   1
   2 -14   0 98.5995 16.9157   1
   2 -14   0 120.063 18.1915   1
  -2 -14   0 133.028 16.2959   1
  -2 -14   0 117.311 14.9504   1
  -2  14   0 134.098 9.77885   3
   2  14   0 129.067 17.2681   2
  -2  14   0 135.638 16.8551   2
  -2  14   0 140.596 18.6483   1
  -2  14   0 151.436 15.8017   1
   3 -14   0 -1.2361 11.3021   1
  -3 -14   0 10.1483 7.67342   1
   3 -14   0 -3.1974 11.5042   1
  -3 -14   0 14.6591 8.69102   1
  -3 -14   0 8.49775 10.1186   2
  -3  14   0 4.49379 9.63340   2
  -3  14   0 15.3717 5.59386   3
  -3  14   0 1.73777 9.08589   1
   3  14   0 22.6111 10.3511   2
  -3  14   0 17.6112 12.5713   1
   4 -14   0 385.701 30.2878   1
  -4 -14   0 346.454 32.1615   2
  -4 -14   0 343.780 23.4627   1
  -4 -14   0 353.589 25.1025   1
   4  14   0 355.523 27.8324   2
  -4  14   0 338.799 23.3138   3
  -4  14   0 357.661 28.0476   1
  -4  14   0 374.566 27.6563   2
  -4  14   0 270.346 30.2520   1
  -5 -14   0 245.073 15.8783   3
  -5 -14   0 215.940 20.1285   1
  -5 -14   0 298.176 19.7944   1
  -5 -14   0 226.301 22.6467   4
   5 -14   0 226.390 25.3161   1
  -5  14   0 253.558 23.3262   1
  -5  14   0 242.690 22.8502   2
  -5  14   0 246.602 19.9849   3
   5  14   0 256.812 23.5463   2
  -6 -14   0 319.980 26.9687   4
  -6 -14   0 311.110 21.3479   1
  -6 -14   0 346.621 21.6402   3
  -6 -14   0 354.948 23.1157   1
  -6  14   0 311.768 25.2413   3
  -6  14   0 296.049 26.4505   2
   6  14   0 360.304 29.1333   2
  -6  14   0 309.116 34.6055   1
  -7 -14   0 197.780 18.3573   3
   7 -14   0 241.959 26.1263   1
  -7 -14   0 161.243 14.8472   1
  -7 -14   0 215.852 21.9524   4
  -7 -14   0 182.564 22.0872   1
  -7  14   0 204.046 21.5766   3
  -7  14   0 222.720 23.4838   1
  -7  14   0 201.399 21.9490   2
  -8 -14   0 109.431 13.6019   1
   8 -14   0 118.167 21.3068   1
  -8 -14   0 154.553 12.3518   1
  -8 -14   0 143.902 21.8315   4
  -8  14   0 129.941 20.5409   1
  -8  14   0 131.658 21.3388   3
   9 -14   0 176.843 29.6199   1
  -9 -14   0 134.328 21.8216   3
  -9 -14   0 168.516 23.2072   4
  -9  14   0 131.983 21.9312   1
 -10 -14   0 6.16468 14.6315   3
  10 -14   0 10.5818 18.9553   1
 -10  14   0 4.95530 17.3475   1
 -10  14   0 -6.4745 15.0549   3
 -11 -14   0 45.1434 17.5547   4
  11 -14   0 12.7578 22.5145   1
 -11  14   0 -16.060 17.8570   3
 -11  14   0 58.2153 23.0562   1
   0 -15   0 0.41938 9.80422   1
   0 -15   0 -15.935 9.82361   1
   0  15   0 5.62604 6.81692   1
   0  15   0 -6.8747 9.53285   1
   0  15   0 -12.373 9.06763   2
   1 -15   0 171.578 21.4787   1
   1 -15   0 181.202 22.7768   1
  -1 -15   0 195.323 20.3186   1
  -1 -15   0 170.865 19.3654   1
  -1  15   0 177.861 19.0752   1
  -1  15   0 170.355 19.8750   2
   1  15   0 177.807 13.6270   1
  -1  15   0 206.253 17.4865   1
   1  15   0 181.415 20.1690   2
   1  15   0 185.709 14.8408   1
   2 -15   0 71.5072 14.8098   1
   2 -15   0 60.0905 14.4659   1
  -2 -15   0 73.1792 13.4836   1
  -2 -15   0 87.8383 14.9214   1
  -2  15   0 83.9743 13.0704   1
  -2  15   0 70.4250 7.08003   3
   2  15   0 77.0430 14.2069   2
  -2  15   0 69.4237 14.9864   1
  -2  15   0 89.1455 14.7363   2
   3 -15   0 29.3415 14.4707   1
  -3 -15   0 45.6080 11.5520   1
  -3  15   0 58.3651 13.4713   2
  -3  15   0 83.3322 15.4550   1
   3  15   0 52.2442 13.0096   2
  -3  15   0 67.2738 9.23700   3
  -3  15   0 49.6611 11.9528   1
  -4 -15   0 31.3116 9.41903   1
   4 -15   0 47.2827 15.1399   1
  -4 -15   0 39.8273 10.5368   1
  -4  15   0 6.95335 15.1595   1
  -4  15   0 27.4055 7.86345   3
  -4  15   0 22.6851 11.3769   2
  -4  15   0 26.9917 11.6042   1
   4  15   0 17.9429 11.4915   2
  -5 -15   0 166.267 10.6520   3
  -5 -15   0 184.799 18.9693   1
  -5 -15   0 177.608 10.9877   3
  -5 -15   0 184.580 16.9452   1
  -5 -15   0 167.869 21.1824   4
  -5  15   0 169.777 21.0713   2
  -5  15   0 189.076 17.8839   3
   5  15   0 163.536 23.7086   2
  -5  15   0 205.529 23.0924   1
  -6 -15   0 27.5143 12.9476   4
  -6 -15   0 40.2404 9.42450   1
   6 -15   0 38.8446 16.0814   1
  -6 -15   0 34.9082 6.97050   3
  -6 -15   0 17.4960 8.47798   1
  -6  15   0 25.2819 10.5881   3
  -6  15   0 37.1005 15.6534   2
   6  15   0 28.9776 13.5361   2
  -6  15   0 36.5977 13.4412   1
  -7 -15   0 253.813 19.3118   3
  -7 -15   0 227.188 20.2508   1
  -7 -15   0 215.787 19.8692   1
   7 -15   0 278.789 29.0905   1
  -7  15   0 260.899 27.6723   1
  -7  15   0 242.252 24.3366   3
  -7  15   0 268.023 25.7772   2
   7  15   0 256.948 27.1632   2
  -8 -15   0 28.4650 16.7099   4
  -8 -15   0 47.6487 15.0165   1
   8 -15   0 42.9031 19.0234   1
  -8 -15   0 17.8477 11.3598   3
  -8  15   0 20.5484 13.7141   3
  -8  15   0 46.9813 16.3905   1
  -8  15   0 45.9496 14.5164   2
  -9 -15   0 61.0155 16.1981   4
   9 -15   0 91.5529 22.0759   1
  -9 -15   0 75.4314 15.0708   3
  -9  15   0 21.9193 16.0893   3
  -9  15   0 50.7182 18.4264   1
  -9  15   0 40.6575 16.8195   2
 -10 -15   0 47.9714 24.6711   3
  10 -15   0 110.217 24.2351   1
 -10 -15   0 84.1687 18.0644   4
 -10  15   0 64.2633 20.7213   3
 -10  15   0 75.6315 23.6838   1
 -10  15   0 96.4791 18.9897   2
  11 -15   0 11.3556 25.7332   1
 -11 -15   0 21.0511 18.5717   4
 -11  15   0 40.7518 19.3320   2
 -11  15   0 -2.4536 23.6973   1
 -11  15   0 28.3270 21.7847   3
   0 -16   0 8.41675 11.6752   1
   0 -16   0 10.9121 13.1500   1
   0  16   0 2.03880 7.30246   1
   0  16   0 3.60023 9.45179   1
   0  16   0 18.5450 11.7583   2
   1 -16   0 36.5966 14.3192   1
   1 -16   0 34.4593 15.1504   1
  -1 -16   0 16.7018 12.5678   1
  -1 -16   0 15.9971 11.8948   1
  -1  16   0 24.8036 9.75949   1
   1  16   0 31.5069 6.91482   1
   1  16   0 21.9724 11.7941   2
  -1  16   0 18.1248 11.8333   2
   1  16   0 36.4258 6.76000   1
  -1  16   0 20.5310 11.4210   1
  -2 -16   0 -12.724 10.6540   1
  -2 -16   0 0.79394 10.9749   1
   2 -16   0 10.5590 12.8175   1
   2  16   0 21.9526 11.9549   2
  -2  16   0 9.39942 11.1766   2
  -2  16   0 -3.1641 12.9275   1
  -2  16   0 2.06063 10.2292   1
  -3 -16   0 68.0292 13.3837   1
  -3 -16   0 94.5606 14.9323   1
   3 -16   0 48.8906 16.6121   1
  -3  16   0 98.6451 16.3575   2
  -3  16   0 66.2761 14.4521   1
  -3  16   0 96.9370 18.3953   1
   3  16   0 103.915 19.0670   2
  -3  16   0 68.4450 10.0901   3
  -4  16   0 48.9615 14.1565   1
  -4  16   0 35.6913 15.7808   2
  -4  16   0 42.4134 8.37771   3
   5 -16   0 94.0968 19.5312   1
  -5 -16   0 93.4311 13.1364   1
  -5 -16   0 87.1175 13.7802   1
   5  16   0 82.3926 16.2413   2
  -5  16   0 67.6892 19.0149   2
  -5  16   0 91.6361 15.0411   3
  -6 -16   0 100.895 18.0946   1
   6 -16   0 158.642 24.3186   1
  -6 -16   0 137.703 11.7207   3
  -6 -16   0 130.508 10.1273   3
  -6 -16   0 148.674 17.3773   1
  -6 -16   0 141.729 23.4684   4
   6  16   0 152.870 21.3694   2
  -6  16   0 104.664 18.6262   3
  -6  16   0 148.369 21.5568   2
  -6  16   0 122.721 19.8732   1
  -7 -16   0 17.2556 7.68754   3
  -7 -16   0 34.8323 10.0954   1
  -7 -16   0 -0.0887 13.4542   4
   7 -16   0 51.8018 19.3308   1
   7  16   0 40.8275 14.4502   2
  -7  16   0 16.5685 13.7769   2
  -7  16   0 13.8888 12.3847   3
  -7  16   0 35.2184 15.7717   1
  -8 -16   0 77.1102 17.2286   4
  -8 -16   0 82.7370 13.4285   3
   8 -16   0 50.3428 21.7383   1
  -8  16   0 73.6430 16.7730   3
  -8  16   0 48.8098 16.4235   2
  -8  16   0 96.8102 20.6481   1
   9 -16   0 36.0462 21.7204   1
  -9 -16   0 56.4631 17.3040   4
  -9  16   0 17.0046 16.1577   3
  -9  16   0 56.2366 19.5909   1
  -9  16   0 6.71416 17.4267   2
  10 -16   0 41.0837 24.6819   1
 -10 -16   0 9.50888 18.3795   4
 -10  16   0 38.6895 18.7552   2
 -10  16   0 48.4541 20.8635   3
 -10  16   0 60.1780 23.1361   1
   0 -17   0 -25.306 12.4136   1
   0  17   0 -5.4157 9.93010   1
   0  17   0 -13.351 7.76672   1
  -1 -17   0 35.6457 14.6643   1
  -1 -17   0 37.2122 14.3339   1
   1 -17   0 35.2619 16.0320   1
   1  17   0 24.1924 6.36291   1
   1  17   0 14.8984 15.2086   2
  -1  17   0 25.6045 12.3738   1
  -1  17   0 27.2704 10.4144   1
   2 -17   0 19.0555 14.3111   1
  -2 -17   0 20.8332 13.8759   1
  -2 -17   0 32.6035 13.4947   1
   2  17   0 22.0256 12.1127   2
  -2  17   0 22.3320 11.4823   1
  -2  17   0 8.11243 15.5114   2
  -2  17   0 16.6499 14.4519   1
  -3 -17   0 24.8057 12.9136   1
   3 -17   0 -0.7416 17.8821   1
  -3 -17   0 24.4760 12.1331   1
  -3  17   0 26.0085 13.4069   2
   3  17   0 59.2426 13.8638   2
  -3  17   0 22.3886 18.4179   1
  -3  17   0 26.2572 12.9920   1
  -4 -17   0 27.5041 13.0040   4
  -4 -17   0 -2.0512 11.7098   1
  -4 -17   0 11.3295 11.8089   1
   4 -17   0 1.47529 15.0965   1
  -4  17   0 22.8115 7.51471   3
   4  17   0 3.62295 11.5598   2
  -4  17   0 0.79426 12.4085   1
  -4  17   0 25.4948 13.1685   2
  -5 -17   0 124.977 19.7036   1
   5 -17   0 115.607 21.8739   1
  -5 -17   0 106.352 18.4343   4
  -5 -17   0 88.0577 19.7502   1
   5  17   0 95.7032 17.7048   2
  -5  17   0 141.905 21.3710   2
  -5  17   0 105.111 18.6896   1
  -5  17   0 95.8740 13.3439   3
   6 -17   0 25.4420 18.0539   1
  -6 -17   0 26.7224 14.5772   4
  -6 -17   0 -4.6353 11.7843   1
  -6  17   0 -3.5711 12.8806   2
  -6  17   0 21.5211 14.4487   1
  -6  17   0 7.94233 10.8569   3
   6  17   0 46.6019 14.7713   2
   7 -17   0 102.585 22.2479   1
  -7 -17   0 101.852 14.5259   1
  -7 -17   0 110.129 20.4674   4
   7  17   0 83.1347 18.2618   2
  -7  17   0 93.7136 16.7036   3
  -7  17   0 60.4375 18.4011   2
  -7  17   0 77.2594 19.2862   1
  -8 -17   0 20.9645 17.0225   4
   8 -17   0 9.56502 20.0578   1
  -8  17   0 -5.8183 16.8886   1
  -8  17   0 -1.2595 14.8803   3
  -8  17   0 -22.695 15.2303   2
   9 -17   0 72.5376 25.5109   1
  -9 -17   0 78.1247 19.5023   4
  -9  17   0 76.9642 19.5359   3
  -9  17   0 63.5458 20.6614   2
  -9  17   0 99.6105 24.0749   1
 -10 -17   0 51.0304 21.6648   4
  10 -17   0 80.4181 29.8058   1
 -10  17   0 92.5729 23.9849   3
 -10  17   0 101.638 31.5900   1
 -10  17   0 53.0986 22.3641   2
   0 -18   0 200.009 26.5864   1
   0  18   0 185.037 17.8153   1
   0  18   0 183.310 24.6032   2
   0  18   0 160.942 24.7908   1
  -1 -18   0 31.9630 14.8249   1
   1 -18   0 31.4403 18.1984   1
  -1  18   0 6.24183 10.7252   1
   1  18   0 28.1045 13.5737   2
  -1  18   0 32.7119 13.7617   2
  -1  18   0 7.66171 13.4487   1
   1  18   0 24.8062 8.35399   1
   1  18   0 8.12008 9.11074   1
  -2 -18   0 227.364 26.0189   1
   2 -18   0 151.470 27.2277   1
  -2 -18   0 194.822 32.8583   1
  -2  18   0 221.594 25.2472   2
  -2  18   0 186.356 23.2656   1
   2  18   0 218.584 25.3195   2
  -2  18   0 203.243 28.2868   1
  -3 -18   0 88.8283 17.4478   1
   3 -18   0 60.3779 18.1125   1
  -3 -18   0 70.7132 17.1069   1
   3  18   0 85.3521 17.4189   2
  -3  18   0 79.8737 17.2170   2
  -3  18   0 78.2100 15.8688   1
  -4 -18   0 41.8117 15.1664   1
  -4 -18   0 42.7579 14.6521   1
   4 -18   0 23.1429 18.6691   1
  -4 -18   0 54.0263 15.9679   4
  -4  18   0 17.2121 14.4633   1
   4  18   0 3.77938 13.5916   2
  -4  18   0 29.1610 7.65827   3
  -4  18   0 25.5018 14.3868   2
  -5 -18   0 -3.2834 14.1112   4
   5 -18   0 27.4149 18.7039   1
  -5 -18   0 -5.9016 13.3977   1
  -5  18   0 23.9323 10.0197   3
  -5  18   0 -4.5028 14.5311   1
  -5  18   0 51.2467 16.3335   2
   5  18   0 19.9416 14.5820   2
  -6 -18   0 127.060 21.1135   4
   6 -18   0 94.1189 23.8249   1
  -6 -18   0 111.771 17.4359   1
  -6  18   0 94.2364 15.3257   3
  -6  18   0 121.305 21.6537   1
   6  18   0 140.949 23.6248   2
  -6  18   0 115.176 21.4420   2
   7 -18   0 56.4396 22.2988   1
  -7 -18   0 47.3405 18.7353   4
  -7  18   0 25.6871 17.1880   2
  -7  18   0 32.9824 19.4559   1
   7  18   0 46.0974 17.6729   2
  -7  18   0 27.1880 15.2453   3
   8 -18   0 30.8657 24.0460   1
  -8 -18   0 38.8722 20.0565   4
  -8  18   0 29.8089 20.6651   1
  -8  18   0 29.9005 17.7508   3
  -8  18   0 55.6205 20.5195   2
   9 -18   0 40.5128 28.8892   1
  -9 -18   0 46.5463 20.6792   4
  -9  18   0 49.4748 21.3534   2
  -9  18   0 67.5629 21.0792   3
  -9  18   0 40.3937 24.7576   1
   0  19   0 8.44845 9.42332   1
   0  19   0 -0.7322 13.8713   2
  -1 -19   0 141.208 23.1768   1
   1 -19   0 142.384 23.2712   1
  -1  19   0 142.042 20.3087   1
  -1  19   0 183.650 24.5875   2
  -1  19   0 154.648 25.7178   1
   1  19   0 138.121 21.8309   2
  -2 -19   0 67.2642 17.2706   1
   2 -19   0 87.7755 19.9255   1
  -2  19   0 46.1888 19.0957   1
  -2  19   0 52.9715 14.8096   1
   2  19   0 73.0192 17.6876   2
  -2  19   0 87.1178 18.1063   2
   3 -19   0 101.162 21.6014   1
  -3 -19   0 105.247 18.9896   1
  -3  19   0 95.6929 18.9390   2
  -3  19   0 50.7608 16.1598   1
   3  19   0 96.5582 18.3979   2
   4 -19   0 41.1000 20.0054   1
  -4 -19   0 92.1702 18.9113   4
  -4 -19   0 72.6480 17.9248   1
  -4  19   0 73.5872 17.3936   1
  -4  19   0 57.7308 17.6091   2
   4  19   0 55.6327 17.0496   2
   5 -19   0 82.1479 24.8861   1
  -5 -19   0 124.566 19.3094   1
  -5 -19   0 77.9750 19.4662   4
   5  19   0 68.8759 18.7252   2
  -5  19   0 60.7756 17.8421   2
  -5  19   0 77.7313 17.9457   1
  -6 -19   0 97.8485 21.0503   4
   6 -19   0 71.6061 24.3084   1
  -6 -19   0 116.171 22.4186   1
  -6  19   0 115.714 21.4796   1
   6  19   0 94.5035 20.9345   2
  -6  19   0 125.545 22.1167   2
   7 -19   0 176.234 30.0701   1
  -7 -19   0 227.359 30.8162   4
   7  19   0 122.448 24.5465   2
  -7  19   0 171.066 26.6275   1
  -7  19   0 174.003 29.5745   2
   8 -19   0 133.422 31.5226   1
  -8 -19   0 126.249 26.6188   4
  -8  19   0 119.463 27.3256   1
  -8  19   0 122.995 24.4908   2
   0 -20   0 34.0873 18.4539   1
   0  20   0 33.9526 10.9125   1
   0  20   0 2.13407 16.1267   2
  -1 -20   0 5.78837 18.5923   1
   1 -20   0 40.0578 18.6134   1
   1  20   0 20.6006 17.0942   2
  -1  20   0 -6.9217 12.6540   1
  -1  20   0 -2.9525 16.2735   2
   2 -20   0 67.5547 20.6555   1
  -2 -20   0 38.7842 28.0554   1
  -2  20   0 44.4919 18.1388   2
  -2  20   0 47.4837 15.2762   1
   2  20   0 37.3889 17.3448   2
   3 -20   0 118.965 24.5621   1
  -3 -20   0 104.299 20.5085   1
  -3 -20   0 59.4715 18.5593   4
  -3  20   0 86.0477 20.1685   2
  -3  20   0 72.0764 21.7909   1
   3  20   0 61.3526 19.4646   2
   4 -20   0 198.363 31.6371   1
  -4 -20   0 120.005 22.6895   4
  -4 -20   0 118.032 20.6280   1
   4  20   0 72.6390 20.0422   2
  -4  20   0 74.0189 19.9929   2
  -4  20   0 126.908 21.6006   1
  -5 -20   0 28.7346 20.5032   4
   5 -20   0 70.4528 25.0834   1
  -5 -20   0 52.9521 18.4088   1
   5  20   0 65.3429 19.9731   2
  -5  20   0 57.6388 20.0201   2
  -5  20   0 67.5904 19.3310   1
   6 -20   0 77.5481 26.8697   1
  -6 -20   0 132.868 25.4022   4
  -6  20   0 114.039 24.7696   2
   6  20   0 132.966 23.9831   2
  -6  20   0 140.402 25.3842   1
  -7 -20   0 104.304 26.9215   4
   7 -20   0 154.579 34.0126   1
  -7  20   0 171.536 28.4750   2
   7  20   0 77.3859 24.8274   2
  -7  20   0 101.239 26.1776   1
   0 -21   0 -25.852 19.9733   1
   0  21   0 9.12449 18.0525   2
  -1 -21   0 0.14122 19.3308   1
   1 -21   0 -24.302 19.8121   1
  -1  21   0 4.76754 18.7200   2
  -1  21   0 19.5962 14.2258   1
   1  21   0 -1.6695 17.3819   2
   2 -21   0 19.2115 21.9078   1
  -2 -21   0 43.6410 20.2104   1
  -2 -21   0 66.4365 20.3160   4
  -2  21   0 68.2904 20.0527   2
  -2  21   0 25.9307 16.2860   1
   2  21   0 55.2893 19.2915   2
  -3 -21   0 39.1056 19.8990   4
  -3 -21   0 4.82648 25.8650   1
   3 -21   0 30.0763 24.3556   1
  -3  21   0 39.3939 17.4429   1
  -3  21   0 8.65200 18.9767   2
   3  21   0 11.0086 17.9583   2
  -4 -21   0 42.2674 25.8173   1
   4 -21   0 46.4992 24.9707   1
  -4 -21   0 26.4279 21.6509   4
  -4  21   0 49.1297 20.0658   2
  -4  21   0 47.3710 19.5706   1
   4  21   0 24.6229 19.7179   2
   5 -21   0 0.65382 25.3676   1
  -5 -21   0 60.9638 23.3244   4
  -5  21   0 54.2787 22.7797   2
  -5  21   0 71.0606 22.7776   1
   5  21   0 41.6097 21.6268   2
   6 -21   0 80.3444 32.9571   1
  -6 -21   0 31.8879 24.8513   4
  -6  21   0 55.8782 23.0416   1
  -6  21   0 82.1013 24.8222   2
   6  21   0 75.4381 26.4966   2
   0 -22   0 12.3369 24.1900   1
   0  22   0 23.3857 22.4138   2
  -1 -22   0 26.4399 24.0266   1
  -1 -22   0 0.89000 20.7677   4
   1 -22   0 10.6929 23.2208   1
  -1  22   0 19.9288 20.4799   2
   1  22   0 -20.774 18.9095   2
  -2 -22   0 -0.8094 22.7837   4
   2 -22   0 16.1884 24.7305   1
  -2 -22   0 0.39940 22.0409   1
   2  22   0 26.6538 21.5602   2
  -2  22   0 -8.7816 21.7089   1
  -2  22   0 -14.009 20.3525   2
   3 -22   0 27.6670 26.8231   1
  -3 -22   0 26.4223 22.7481   4
  -3 -22   0 71.1342 25.4967   1
   3  22   0 13.3011 21.7880   2
  -3  22   0 36.2767 23.2173   2
  -3  22   0 54.7831 20.1489   1
   4 -22   0 154.577 34.1322   1
  -4 -22   0 249.216 37.8055   1
  -4 -22   0 166.951 30.7937   4
  -4  22   0 150.824 26.8654   1
  -4  22   0 156.664 29.5163   2
   4  22   0 228.296 36.3905   2
   0 -23   0 -29.474 26.9137   1
   0 -23   0 25.8866 25.4461   4
   0  23   0 19.9320 25.4218   2
   1 -23   0 19.7092 28.1035   1
  -1 -23   0 35.3860 27.6545   1
  -1 -23   0 66.2644 28.3692   4
  -1  23   0 -20.041 23.3291   2
   1  23   0 -41.268 25.0948   2
   2 -23   0 52.8955 29.9206   1
  -2 -23   0 100.320 29.1873   1
  -2 -23   0 93.6269 34.3312   4
  -2  23   0 70.2076 28.0680   2
   2  23   0 99.8597 33.0931   2
 -14   0   1 12.8568 20.7370   3
 -14   0   1 12.6758 17.8918   1
 -13   0   1 316.153 29.9347   1
 -13   0   1 287.075 34.0143   3
 -12   0   1 373.021 29.6176   1
 -12   0   1 347.917 33.5138   3
 -12   0   1 345.658 35.4779   1
 -11   0   1 161.914 18.8943   1
 -11   0   1 141.105 22.8046   1
 -10   0   1 533.034 33.1623   1
 -10   0   1 508.297 36.9095   3
 -10   0   1 468.387 34.3775   1
  -9   0   1 17.3637 10.4136   3
  -9   0   1 32.5541 8.31405   1
  -9   0   1 37.2125 9.51131   1
   8   0  -1 569.549 29.9457   1
  -8   0   1 543.334 30.7559   4
  -8   0   1 633.719 38.1185   3
   8   0  -1 539.734 31.1388   4
  -8   0   1 624.975 34.1814   1
  -8   0   1 566.652 34.9431   1
   7   0  -1 256.531 14.8739   1
  -7   0   1 285.612 17.6720   1
   7   0  -1 269.906 14.8630   1
  -7   0   1 254.171 15.0391   4
  -7   0   1 265.690 20.6715   3
   7   0  -1 245.539 15.3964   4
  -7   0   1 268.427 18.4055   1
  -6   0   1 25.6989 5.27541   1
  -6   0   1 24.6053 3.66515   4
   6   0  -1 22.1728 3.42381   4
   6   0  -1 22.9031 3.85039   1
   6   0  -1 21.1862 3.46988   1
  -6   0   1 20.8833 5.01047   1
   5   0  -1 594.806 32.3923   1
   5   0  -1 601.161 32.3026   4
  -5   0   1 610.805 32.1579   4
  -5   0   1 605.276 33.7443   1
   5   0  -1 625.534 32.2635   1
   4   0  -1 426.557 22.5300   1
  -4   0   1 419.600 23.1192   1
   4   0  -1 401.332 22.7326   1
  -4   0   1 425.122 22.4546   4
   4   0  -1 423.888 22.5592   4
  -4   0   1 413.842 23.5284   1
  -3   0   1 300.862 16.6565   1
   3   0  -1 305.710 16.4331   4
  -3   0   1 315.420 16.3909   4
  -3   0   1 287.473 16.9777   1
   3   0  -1 306.181 16.3950   1
   3   0  -1 293.381 16.6812   1
  -2   0   1 4036.95 202.374   4
   2   0  -1 4105.44 202.416   4
  -2   0   1 3928.16 202.736   1
   2   0  -1 3928.31 202.630   1
   2   0  -1 3961.93 202.324   1
  -2   0   1 3905.71 202.429   1
   1   0   1 572.241 29.8644   1
  -1   0  -1 569.308 30.3814   3
   1   0   1 557.818 29.9460   1
   1   0   1 587.674 30.4932   3
  -1   0  -1 566.130 29.9986   1
  -1   0  -1 580.425 29.4577   4
  -1   0  -1 576.509 29.9299   1
  -2   0  -1 403.451 22.9270   3
  -2   0  -1 408.140 22.1283   1
   2   0   1 407.507 21.8246   1
   2   0   1 426.796 23.1688   3
   2   0   1 410.946 21.9812   1
  -2   0  -1 411.230 22.0570   1
   3   0   1 1050.57 58.2911   3
   3   0   1 1098.96 56.6255   1
   3   0   1 1072.31 56.4176   1
  -3   0  -1 1196.66 58.5619   3
  -3   0  -1 1069.55 56.9406   1
  -3   0  -1 1065.45 56.9061   1
  -4   0  -1 2435.76 126.362   1
  -4   0  -1 2341.90 126.217   1
   4   0   1 2483.62 125.647   1
   4   0   1 2396.99 125.402   1
  -4   0  -1 2603.23 128.163   3
  -5   0  -1 585.161 34.3217   3
   5   0   1 591.289 30.9981   1
  -5   0  -1 558.333 32.2991   1
  -5   0  -1 594.766 32.3396   1
   5   0   1 570.402 30.7602   1
  -6   0  -1 124.564 11.4085   1
  -6   0  -1 149.164 11.1831   1
  -6   0  -1 142.240 13.8908   3
   6   0   1 136.638 8.67820   1
   6   0   1 142.727 8.95420   1
  -7   0  -1 3.96036 5.02223   1
   7   0   1 3.67850 2.01564   1
  -7   0  -1 3.36872 7.02444   3
  -7   0  -1 3.06318 5.56470   1
  -8   0  -1 69.8900 10.5709   1
  -8   0  -1 73.7923 12.6638   3
  -8   0  -1 79.5729 10.9924   1
  -9   0  -1 19.7366 9.24455   1
  -9   0  -1 11.6710 10.0510   3
  -9   0  -1 11.5709 7.61082   1
 -10   0  -1 79.1583 12.4159   1
 -10   0  -1 51.3420 13.8112   1
 -10   0  -1 66.9965 15.0350   3
 -11   0  -1 98.6270 18.1231   3
 -11   0  -1 90.0372 15.0530   1
 -11   0  -1 74.9575 18.0561   1
 -11   0  -1 85.8746 15.1693   2
 -12   0  -1 80.6715 18.5478   3
 -12   0  -1 75.5384 15.7076   1
 -12   0  -1 62.3213 17.3176   2
 -13   0  -1 145.384 25.0364   3
 -14   0  -1 18.7812 23.2788   3
 -14   0  -1 36.4831 20.5584   1
 -14  -1   1 106.795 25.7618   3
 -14   1   1 97.7986 21.2484   1
 -14   1   1 117.007 27.3115   3
 -13  -1   1 69.1415 15.3146   1
 -13  -1   1 71.6816 19.9559   3
 -13   1   1 61.2553 16.9919   1
 -13   1   1 48.3968 19.8156   3
 -12  -1   1 471.793 38.8180   3
 -12  -1   1 441.268 39.0193   1
 -12  -1   1 512.151 34.5534   1
 -12   1   1 471.358 39.2279   3
 -12   1   1 470.187 34.7197   1
 -11  -1   1 655.012 41.1538   1
 -11  -1   1 650.356 43.4786   1
 -11   1   1 616.242 45.1142   1
 -11   1   1 710.096 42.5002   1
 -10  -1   1 474.197 30.9130   1
 -10  -1   1 423.710 32.2031   1
 -10  -1   1 540.762 36.3813   3
 -10   1   1 532.036 35.4015   3
 -10   1   1 458.389 31.4971   1
 -10   1   1 451.686 33.6545   1
  -9  -1   1 251.016 17.8499   1
  -9  -1   1 234.554 19.2309   1
   9  -1  -1 208.769 13.7452   4
  -9  -1   1 216.149 21.9870   3
  -9  -1   1 202.174 15.4613   4
   9  -1  -1 230.444 13.9737   1
  -9   1   1 248.848 18.9734   1
  -9   1   1 250.339 22.6906   3
  -9   1   1 220.916 20.4501   1
   8  -1  -1 34.6631 5.15159   1
   8  -1  -1 36.2348 5.37872   4
   8  -1  -1 53.9402 6.79015   1
  -8  -1   1 36.3303 6.56627   1
  -8  -1   1 27.1078 10.0503   3
  -8  -1   1 34.0950 6.19836   4
  -8   1   1 32.5969 7.70374   1
  -8   1   1 19.5620 9.50344   3
  -8   1   1 30.5158 8.66149   1
  -7  -1   1 159.185 15.8427   3
  -7  -1   1 158.917 13.0559   1
  -7  -1   1 154.042 10.3962   4
   7  -1  -1 143.758 10.4336   4
   7  -1  -1 160.288 11.7145   1
  -7  -1   1 165.348 12.4745   1
   7  -1  -1 152.956 11.1897   1
  -7   1   1 189.239 13.6800   1
  -7   1   1 208.482 17.0286   3
   7   1  -1 173.304 11.0711   4
  -7   1   1 182.495 14.8414   1
   6  -1  -1 30.5654 5.13769   1
  -6  -1   1 33.4360 6.47342   1
  -6  -1   1 26.9144 4.10085   4
   6  -1  -1 33.5456 4.32050   4
   6  -1  -1 30.0943 4.47159   1
  -6  -1   1 31.1302 5.55444   1
   6   1  -1 36.7478 4.79289   4
  -6   1   1 41.8870 6.27590   1
  -6   1   1 36.4978 6.42733   1
  -6   1   1 36.1962 4.07300   4
  -5  -1   1 114.757 7.31294   4
   5  -1  -1 111.931 8.17105   1
   5  -1  -1 114.623 7.30168   4
  -5  -1   1 113.656 8.45753   1
  -5  -1   1 116.567 7.89349   1
   5   1  -1 90.4975 7.40095   4
  -5   1   1 92.1618 7.01582   4
  -5   1   1 109.500 9.50144   1
  -5   1   1 119.904 9.20906   1
   4  -1  -1 326.766 17.0297   4
  -4  -1   1 314.587 17.0984   4
   4  -1  -1 313.229 17.6257   1
   4  -1  -1 293.980 17.9429   1
  -4  -1   1 302.383 17.0969   1
  -4  -1   1 296.926 17.4898   1
  -4   1   1 322.095 18.6471   1
   4   1  -1 293.862 16.1216   1
  -4   1   1 317.561 16.9728   4
   4   1  -1 315.012 17.2403   4
  -4   1   1 305.960 19.1589   1
  -3  -1   1 28.1397 3.27741   1
   3  -1  -1 38.0805 3.25734   4
  -3  -1   1 31.6682 2.93476   1
   3  -1  -1 36.0370 3.73502   1
   3  -1  -1 28.9083 4.10685   1
  -3  -1   1 29.3006 3.15546   4
   3   1  -1 39.2965 2.57606   1
  -3   1   1 42.8508 3.27791   4
   3   1  -1 43.6062 3.52994   4
  -3   1   1 45.6054 4.22151   1
  -3   1   1 41.1458 4.38263   1
  -2  -1   1 504.082 26.6932   1
   2  -1  -1 506.001 27.4601   1
   2  -1  -1 531.503 26.8010   4
   2  -1  -1 503.236 27.0789   1
  -2  -1   1 513.687 26.4469   1
  -2  -1   1 504.870 26.8538   4
  -2   1   1 505.982 26.7603   4
   2   1  -1 510.808 26.2778   1
  -2   1   1 521.215 27.5572   1
  -2   1   1 520.972 27.2176   1
   2   1  -1 494.690 26.8842   4
  -1  -1   1 2071.19 107.234   1
   1  -1  -1 2109.03 107.501   1
  -1  -1   1 2031.85 107.056   1
  -1  -1   1 2079.59 107.376   4
   1  -1  -1 2154.31 107.740   1
   1  -1  -1 2067.34 107.327   4
   1   1  -1 2036.32 107.417   4
  -1   1   1 2092.19 107.276   4
  -1   1   1 2153.14 107.471   1
   1   1  -1 2066.35 107.075   1
  -1   1   1 2179.78 107.851   1
   1   1  -1 2132.32 107.255   1
   1  -1   1 853.865 44.2684   3
   1  -1   1 822.337 43.9819   1
   1  -1   1 754.842 43.2980   4
  -1  -1  -1 822.520 43.4256   1
  -1  -1  -1 835.846 43.5413   2
   1  -1   1 826.124 43.9182   1
  -1  -1  -1 845.846 43.9963   3
  -1  -1  -1 849.880 43.3633   1
  -1   1  -1 889.402 44.2569   3
   1   1   1 872.130 43.3103   1
  -1   1  -1 889.560 44.0848   1
  -1   1  -1 895.840 44.0952   1
  -1   1  -1 788.301 43.3347   4
   1   1   1 749.590 43.2207   1
   1   1   1 904.769 43.5969   2
   1   1   1 919.732 44.1451   3
   2  -1   1 559.484 30.1435   3
  -2  -1  -1 521.595 28.6033   1
  -2  -1  -1 531.873 29.7549   3
  -2  -1  -1 539.804 28.5216   1
   2  -1   1 544.024 29.3330   1
  -2  -1  -1 556.435 28.9581   2
   2  -1   1 531.072 29.1875   1
  -2   1  -1 563.424 29.4720   1
  -2   1  -1 550.852 29.4760   1
  -2   1  -1 578.507 30.0999   3
   2   1   1 525.700 29.8138   3
  -3  -1  -1 2865.31 145.355   1
   3  -1   1 2879.63 147.371   3
  -3  -1  -1 3089.32 147.269   3
   3  -1   1 2864.31 145.895   1
  -3  -1  -1 2537.61 144.768   4
   3  -1   1 2953.43 146.133   1
  -3  -1  -1 2818.23 145.441   1
   3   1   1 2672.91 146.980   3
  -3   1  -1 2758.71 146.199   1
  -3   1  -1 2767.47 146.313   1
  -3   1  -1 3114.57 147.552   3
  -4  -1  -1 972.370 53.5638   1
  -4  -1  -1 1008.12 52.5110   4
  -4  -1  -1 981.160 53.6464   1
   4  -1   1 1013.80 54.0815   1
  -4  -1  -1 1057.89 55.8262   3
   4  -1   1 929.931 54.4825   1
  -4   1  -1 1025.83 54.7367   1
  -4   1  -1 1110.47 54.8080   1
  -4   1  -1 1147.63 56.3548   3
   5  -1   1 431.592 25.1609   1
  -5  -1  -1 392.057 24.4576   1
  -5  -1  -1 469.182 27.2222   3
   5  -1   1 437.208 24.5020   1
  -5  -1  -1 422.758 24.4200   1
  -5  -1  -1 471.226 22.5055   4
  -5   1  -1 405.641 25.3899   1
  -5   1  -1 439.116 27.1220   3
  -5   1  -1 439.002 25.3559   1
  -6  -1  -1 289.457 20.0196   3
   6  -1   1 271.088 16.4525   1
  -6  -1  -1 265.728 17.0282   1
   6  -1   1 274.999 16.2520   1
  -6  -1  -1 276.113 17.1348   1
  -6   1  -1 231.607 19.3964   1
  -6   1  -1 260.391 19.9416   3
  -6   1  -1 267.173 17.6279   1
   7  -1   1 256.959 15.6299   1
  -7  -1  -1 266.699 17.2556   1
  -7  -1  -1 242.318 17.5956   1
  -7  -1  -1 259.809 20.6438   3
   7  -1   1 256.846 15.9271   1
  -7   1  -1 261.478 20.9939   3
  -7   1  -1 263.699 18.3275   1
  -7   1  -1 240.770 18.7746   1
  -8  -1  -1 93.2355 14.8647   3
   8  -1   1 100.563 8.58462   1
  -8  -1  -1 121.691 12.7954   1
  -8  -1  -1 111.589 11.4149   1
  -8   1  -1 76.4593 13.3968   3
  -8   1  -1 104.324 14.0182   1
  -8   1  -1 93.3467 12.4151   1
  -9  -1  -1 33.6825 9.47980   1
  -9  -1  -1 27.5188 7.90900   1
  -9  -1  -1 19.5083 7.90149   2
  -9  -1  -1 20.6429 10.2975   3
   9  -1   1 21.8395 4.59932   1
  -9   1  -1 1.47226 8.02507   1
  -9   1  -1 5.72544 9.65244   1
  -9   1  -1 11.9049 10.4523   3
 -10  -1  -1 -5.3028 8.08072   1
 -10  -1  -1 5.56089 10.6590   1
 -10  -1  -1 4.86039 11.2285   3
 -10  -1  -1 19.8998 9.79013   2
 -10   1  -1 9.44330 9.30083   1
 -10   1  -1 0.89502 12.0633   1
 -10   1  -1 8.70531 11.5129   3
 -11  -1  -1 97.1391 17.7210   1
 -11  -1  -1 100.361 15.9142   2
 -11  -1  -1 112.833 17.8287   1
 -11  -1  -1 72.9957 16.9263   3
 -11   1  -1 78.6000 19.9015   1
 -11   1  -1 83.9797 15.5048   1
 -11   1  -1 98.1934 18.6109   3
 -12  -1  -1 71.7903 18.2057   3
 -12  -1  -1 53.3391 14.0555   1
 -12  -1  -1 18.7584 16.5457   2
 -12   1  -1 19.9625 15.3281   2
 -12   1  -1 47.0848 17.1856   3
 -12   1  -1 69.6469 15.2419   1
 -13  -1  -1 29.6825 19.6364   3
 -13  -1  -1 25.5822 15.7863   1
 -13   1  -1 -8.1329 16.2836   1
 -13   1  -1 38.0182 20.4549   3
 -14  -1  -1 18.3952 20.2874   1
 -14  -1  -1 59.1434 27.2428   3
 -14   1  -1 51.8339 21.8299   1
 -14   1  -1 -3.1511 24.9400   3
 -14  -2   1 34.9522 17.2204   1
 -14  -2   1 -14.056 20.0440   3
 -14   2   1 35.7683 22.7366   3
 -14   2   1 79.4126 19.7546   1
 -13  -2   1 244.836 31.6441   3
 -13  -2   1 222.691 25.7638   1
 -13   2   1 227.045 31.7085   3
 -12  -2   1 211.310 28.9454   1
 -12  -2   1 215.160 27.5852   3
 -12  -2   1 216.111 23.0445   1
 -12   2   1 293.721 28.8398   1
 -12   2   1 216.650 28.3856   3
 -11  -2   1 222.321 24.2235   2
 -11  -2   1 277.713 25.0304   1
  11  -2  -1 253.749 17.3607   1
  11  -2  -1 249.432 15.8388   1
 -11  -2   1 280.262 22.0970   1
 -11   2   1 263.884 28.8030   3
 -11   2   1 239.083 29.1986   1
 -11   2   1 290.753 24.6095   1
 -10  -2   1 172.456 19.6610   2
  10  -2  -1 191.845 13.3846   1
 -10  -2   1 193.005 22.1249   3
 -10  -2   1 153.985 16.5467   1
 -10  -2   1 163.337 18.4410   1
  10  -2  -1 159.490 13.0034   1
 -10   2   1 185.824 22.1991   1
 -10   2   1 222.068 22.9293   3
 -10   2   1 197.394 18.7488   1
   9  -2  -1 163.232 12.2060   1
  -9  -2   1 163.868 13.6287   1
  -9  -2   1 128.376 18.1064   3
  -9  -2   1 162.570 11.4416   4
   9  -2  -1 140.477 11.9558   1
   9  -2  -1 130.492 9.97188   4
  -9  -2   1 151.397 16.6755   1
  -9   2   1 141.531 15.4528   1
  -9   2   1 110.351 17.2501   1
  -9   2   1 117.523 18.0733   3
   8  -2  -1 178.245 13.5402   1
   8  -2  -1 174.793 13.4727   1
   8  -2  -1 174.181 11.6284   4
  -8  -2   1 194.573 12.2086   4
  -8  -2   1 163.345 17.8878   3
  -8  -2   1 160.940 14.3546   1
  -8  -2   1 181.409 13.7627   1
  -8   2   1 206.745 18.9752   3
  -8   2   1 219.335 16.4715   1
  -8   2   1 189.054 17.5516   1
   7  -2  -1 489.957 27.9714   1
  -7  -2   1 503.031 31.7382   3
  -7  -2   1 465.925 28.1301   1
  -7  -2   1 517.907 27.8231   1
   7  -2  -1 499.380 26.4928   4
   7  -2  -1 506.067 28.3810   1
  -7  -2   1 507.342 29.1878   4
  -7   2   1 427.359 29.9551   1
  -7   2   1 475.512 29.5373   1
  -7   2   1 445.168 31.4016   3
  -6  -2   1 100.465 8.70592   1
  -6  -2   1 100.649 8.06531   1
   6  -2  -1 114.452 10.0596   1
   6  -2  -1 109.147 9.21765   1
   6  -2  -1 123.156 7.73815   4
  -6   2   1 118.609 10.5780   1
   6   2  -1 98.1479 8.05131   4
  -6   2   1 93.8081 11.8401   3
  -6   2   1 112.558 12.8568   1
   5  -2  -1 396.322 20.7206   4
   5  -2  -1 373.287 21.8781   1
  -5  -2   1 378.835 20.9383   4
   5  -2  -1 370.883 22.4784   1
  -5  -2   1 354.208 20.9618   1
  -5  -2   1 358.055 20.5306   1
   5   2  -1 356.994 21.0284   4
  -5   2   1 373.940 23.2106   1
  -5   2   1 429.726 22.9462   1
   4  -2  -1 83.2359 5.94611   4
   4  -2  -1 79.3018 7.90391   1
  -4  -2   1 77.3470 5.36866   1
   4  -2  -1 80.3805 6.97078   1
  -4  -2   1 83.3163 6.19256   4
  -4  -2   1 78.7210 5.82037   1
  -4   2   1 99.3406 8.35399   1
   4   2  -1 103.450 6.66146   4
  -3  -2   1 293.754 15.7387   1
  -3  -2   1 292.131 16.5249   4
   3  -2  -1 284.755 17.5931   1
   3  -2  -1 297.905 17.1069   1
   3  -2  -1 294.161 16.2870   4
  -3   2   1 313.519 17.8875   1
   3   2  -1 276.904 16.5177   4
  -3   2   1 301.312 17.3910   1
  -2  -2   1 3422.73 176.728   1
  -2  -2   1 3423.44 177.005   1
   2  -2  -1 3367.16 177.266   4
  -2  -2   1 3561.50 177.961   2
  -2  -2   1 3288.79 177.445   4
   2  -2  -1 3538.89 178.286   1
   2  -2  -1 3473.98 177.804   1
   2   2  -1 3360.88 177.501   4
  -2   2   1 3581.28 177.943   1
  -2   2   1 3768.44 178.398   1
   1  -2  -1 1582.05 80.5023   1
  -1  -2   1 1510.09 79.6260   1
  -1  -2   1 1645.78 80.3246   2
  -1  -2   1 1519.87 80.0837   4
   1  -2  -1 1599.54 80.1722   1
  -1  -2   1 1586.12 79.6636   1
  -1   2   1 1536.57 80.1505   1
   1   2  -1 1566.52 79.5827   1
   1   2  -1 1406.15 79.9796   4
   1   2  -1 1580.80 80.1915   2
   1   2  -1 1503.98 79.5746   1
  -1   2   1 1655.03 80.5367   1
   0  -2   1 2146.02 105.259   3
   0  -2   1 2078.33 105.476   1
   0  -2   1 2147.28 105.471   1
   0  -2  -1 2103.41 105.307   1
   0  -2   1 1900.11 105.280   4
   0  -2  -1 2064.34 105.150   1
   0  -2   1 2114.57 105.300   2
   0  -2  -1 2083.55 104.862   3
   0   2   1 2008.14 105.105   1
   0   2  -1 2040.59 105.279   2
   0   2  -1 2026.78 105.386   1
   0   2   1 2022.63 104.825   3
   0   2   1 2050.36 105.182   1
   0   2  -1 2065.54 105.497   1
   0   2  -1 2038.69 105.226   3
  -1  -2  -1 633.853 32.6195   1
   1  -2   1 644.238 33.7657   1
   1  -2   1 628.350 33.6637   1
  -1  -2  -1 629.082 33.2673   2
  -1  -2  -1 611.922 32.5944   1
  -1  -2  -1 626.819 33.1829   3
   1  -2   1 648.673 33.6946   3
   1   2   1 622.327 33.2534   3
   1   2   1 618.219 33.2935   2
  -1   2  -1 643.017 33.6156   3
  -1   2  -1 619.972 33.6378   1
  -1   2  -1 620.857 33.7925   1
  -2  -2  -1 6444.03 310.837   2
   2  -2   1 6110.23 311.162   1
  -2  -2  -1 6212.34 311.155   3
   2  -2   1 6183.23 311.601   3
   2  -2   1 6286.93 311.230   1
  -2  -2  -1 6112.21 310.103   1
  -2  -2  -1 6383.89 310.322   1
  -2   2  -1 5868.79 311.386   3
  -2   2  -1 6069.81 311.369   1
   2   2   1 5734.32 311.104   3
   2   2   1 6004.18 310.660   2
  -2   2  -1 5839.69 311.121   1
   3  -2   1 710.393 37.9447   1
  -3  -2  -1 684.384 36.3516   1
  -3  -2  -1 708.593 37.5649   2
  -3  -2  -1 740.268 38.5982   3
   3  -2   1 672.449 38.6958   3
  -3   2  -1 735.091 38.8039   3
  -3   2  -1 664.766 38.1556   1
  -3   2  -1 705.530 38.3914   1
   4  -2   1 2340.64 120.990   4
  -4  -2  -1 2382.09 121.668   1
  -4  -2  -1 2187.53 121.552   4
  -4  -2  -1 2467.30 123.051   2
   4  -2   1 2549.04 123.180   1
  -4  -2  -1 2280.64 121.745   1
  -4  -2  -1 2495.56 124.323   3
   4  -2   1 2418.78 123.173   1
  -4   2  -1 2186.78 123.533   1
  -4   2  -1 2445.10 124.639   3
  -4   2  -1 2426.51 123.522   1
   5  -2   1 339.456 19.5394   1
   5  -2   1 348.248 19.3408   1
  -5  -2  -1 326.654 21.2399   3
  -5  -2  -1 304.661 18.1028   1
  -5  -2  -1 305.633 17.9832   1
  -5  -2  -1 329.930 19.4692   2
  -5  -2  -1 315.243 17.2567   4
  -5   2  -1 278.664 20.0547   1
  -5   2  -1 323.577 19.8261   1
  -5   2  -1 306.206 21.3334   3
  -6  -2  -1 219.557 14.7340   2
  -6  -2  -1 213.090 16.8799   3
  -6  -2  -1 201.090 13.4012   1
   6  -2   1 223.580 14.4741   1
  -6  -2  -1 213.767 11.5014   4
   6  -2   1 222.246 14.0750   1
  -6   2  -1 186.120 15.0455   1
  -6   2  -1 168.708 15.4292   1
  -6   2  -1 179.110 16.5673   3
   7  -2   1 72.2411 7.96119   1
  -7  -2  -1 62.4041 8.74790   2
  -7  -2  -1 60.3352 4.20170   4
  -7  -2  -1 63.0546 8.26637   1
  -7  -2  -1 62.6026 8.38967   1
   7  -2   1 67.4889 8.57053   1
  -7  -2  -1 50.1703 10.4959   3
  -7   2  -1 51.8033 8.57309   1
  -7   2  -1 56.1898 9.70753   1
  -7   2  -1 55.9935 10.6589   3
   8  -2   1 8.34531 5.16872   1
  -8  -2  -1 18.3625 7.20953   2
   8  -2   1 10.9162 4.66319   1
  -8  -2  -1 13.5626 8.47192   1
  -8  -2  -1 14.5151 5.45801   1
  -8  -2  -1 3.78295 8.82032   3
  -8   2  -1 9.12578 8.59167   1
  -8   2  -1 7.70773 6.93846   3
  -8   2  -1 -0.5358 6.53579   1
  -9  -2  -1 16.0899 6.77657   1
   9  -2   1 6.38457 5.27569   1
  -9  -2  -1 17.2161 8.42834   1
   9  -2   1 15.9879 5.04900   1
  -9  -2  -1 13.1840 8.41834   2
  -9  -2  -1 4.51394 10.1024   3
  -9   2  -1 17.7691 8.76473   1
  -9   2  -1 12.5333 10.4855   3
  -9   2  -1 20.4138 11.3062   1
 -10  -2  -1 28.1771 11.0278   1
 -10  -2  -1 33.4956 9.47315   1
  10  -2   1 41.8675 5.74158   1
 -10  -2  -1 55.1777 11.4852   2
 -10  -2  -1 18.5337 12.6464   3
 -10   2  -1 15.7660 12.2514   3
 -10   2  -1 18.2669 13.6133   1
 -10   2  -1 31.5964 11.2537   1
 -11  -2  -1 9.43070 13.0731   3
 -11  -2  -1 26.1504 14.2499   1
 -11  -2  -1 26.2829 13.5845   2
 -11  -2  -1 11.1820 10.6561   1
 -11   2  -1 22.3371 11.7107   1
 -11   2  -1 18.9994 13.7255   3
 -12  -2  -1 42.9390 13.5339   1
 -12  -2  -1 -9.7910 18.8806   2
 -12  -2  -1 28.5927 16.2901   3
 -12  -2  -1 45.9816 19.4510   1
 -12   2  -1 21.2597 14.6530   1
 -12   2  -1 50.0437 16.7309   3
 -13  -2  -1 11.3756 15.2129   1
 -13  -2  -1 34.7372 20.4129   3
 -13   2  -1 26.5100 19.7233   3
 -13   2  -1 26.8530 17.0063   1
 -14  -2  -1 23.6275 26.0298   3
 -14   2  -1 29.5887 25.8664   3
 -14   2  -1 15.2838 22.0875   1
 -14  -3   1 129.003 25.6103   3
 -14  -3   1 119.288 29.6570   1
 -14   3   1 129.466 22.8172   1
 -13  -3   1 88.1207 22.2404   3
 -13  -3   1 135.778 22.2685   1
 -13   3   1 104.060 20.1089   1
 -13   3   1 76.3266 21.2521   3
 -12  -3   1 226.681 21.9411   1
 -12  -3   1 207.516 27.3911   3
 -12  -3   1 230.471 28.3016   1
  12  -3  -1 200.746 14.0685   1
 -12   3   1 231.697 28.6927   3
 -12   3   1 257.483 25.8816   1
  11  -3  -1 43.7350 7.78551   1
  11  -3  -1 37.2200 7.85327   1
 -11  -3   1 48.4606 14.8107   2
 -11  -3   1 31.7671 12.2996   1
 -11  -3   1 36.3451 10.2491   1
 -11   3   1 73.0378 14.3443   1
 -11   3   1 71.2295 28.4632   1
 -11   3   1 36.8023 14.6557   3
 -10  -3   1 174.310 21.0255   3
 -10  -3   1 183.064 15.4309   1
 -10  -3   1 171.762 19.9674   2
  10  -3  -1 155.246 16.1154   1
 -10  -3   1 148.637 16.8665   1
  10  -3  -1 136.298 10.2639   4
  10  -3  -1 169.920 14.4430   1
 -10  -3   1 137.874 11.0418   4
 -10   3   1 168.865 21.0186   3
 -10   3   1 140.198 22.3594   1
 -10   3   1 147.508 18.9051   1
  -9  -3   1 56.1487 6.85332   4
   9  -3  -1 39.5755 6.45548   4
  -9  -3   1 63.0684 8.96273   1
  -9  -3   1 34.3568 10.3423   2
  -9  -3   1 51.2570 12.1101   3
   9  -3  -1 42.7079 8.08582   1
  -9   3   1 69.0820 12.8817   3
  -9   3   1 48.4437 10.9148   1
  -9   3   1 65.7371 13.1783   1
   8  -3  -1 326.957 18.9150   4
  -8  -3   1 345.743 20.4905   1
  -8  -3   1 309.605 22.7258   2
  -8  -3   1 358.637 19.5552   4
  -8  -3   1 322.407 25.2027   3
   8  -3  -1 313.486 22.5094   1
   8  -3  -1 360.549 22.1007   1
  -8  -3   1 306.705 20.8156   1
  -8   3   1 300.725 24.5329   1
  -8   3   1 318.635 24.5381   3
  -8   3   1 329.717 23.4160   1
   7  -3  -1 111.060 10.8368   1
  -7  -3   1 105.829 9.62614   1
   7  -3  -1 118.749 8.53224   4
  -7  -3   1 114.148 11.9714   2
  -7  -3   1 115.889 9.19504   4
   7  -3  -1 114.511 11.8980   1
  -7  -3   1 98.9231 8.97239   1
  -7   3   1 143.997 12.4641   1
  -7   3   1 135.974 14.0772   1
  -7   3   1 126.926 14.5056   3
   6  -3  -1 37.4612 6.15776   1
   6  -3  -1 41.9439 4.79205   4
  -6  -3   1 33.0427 6.75760   2
  -6  -3   1 30.5291 5.03886   1
   6  -3  -1 32.5242 6.68198   1
  -6  -3   1 42.4986 5.65090   4
  -6  -3   1 25.3218 4.23973   1
  -6   3   1 37.1776 7.05516   1
  -6   3   1 29.3612 7.62139   3
  -6   3   1 36.2928 7.78774   1
   5  -3  -1 504.464 25.2351   4
  -5  -3   1 462.057 26.5707   4
  -5  -3   1 460.326 24.2897   1
  -5  -3   1 480.147 27.2505   2
   5  -3  -1 486.873 27.5691   1
  -5  -3   1 457.982 24.6800   1
   5  -3  -1 463.958 26.6357   1
  -5   3   1 390.346 27.2381   1
  -5   3   1 427.643 26.8838   1
  -4  -3   1 129.026 7.54561   1
  -4  -3   1 131.773 10.2529   2
  -4  -3   1 110.112 9.73893   4
  -4  -3   1 132.013 7.33667   1
   4  -3  -1 133.429 11.1375   1
   4  -3  -1 142.192 10.2090   1
   4  -3  -1 135.469 8.65843   4
  -4   3   1 145.422 11.0440   1
  -4   3   1 150.051 10.5122   1
  -3  -3   1 297.944 18.6774   4
   3  -3  -1 321.030 18.4047   4
  -3  -3   1 323.726 19.5184   2
   3  -3  -1 351.938 20.2965   1
   3  -3  -1 301.155 19.1739   1
  -3   3   1 388.901 19.9951   1
  -3   3   1 354.956 20.1854   1
  -2  -3   1 446.696 26.1323   4
  -2  -3   1 487.086 25.0609   1
   2  -3  -1 476.442 27.0287   1
  -2  -3   1 497.563 25.0633   1
   2  -3  -1 492.636 26.5585   1
  -2  -3   1 498.719 26.7227   2
  -2   3   1 466.559 26.5588   1
  -2   3   1 483.722 27.0216   1
   2   3  -1 490.470 26.5536   2
   1  -3  -1 741.435 37.7024   1
  -1  -3   1 694.640 37.6791   4
  -1  -3   1 771.533 37.9977   2
  -1  -3   1 761.723 37.1180   1
  -1  -3   1 740.917 37.2030   3
   1  -3  -1 774.927 38.2669   1
  -1  -3   1 739.204 37.2131   1
  -1   3   1 665.260 37.8391   1
   1   3  -1 680.284 36.8670   1
   1   3  -1 642.492 36.9585   1
  -1   3   1 659.650 37.5635   1
   1   3  -1 673.914 37.7394   2
   0  -3  -1 2511.97 127.510   1
   0  -3   1 2498.16 127.970   1
   0  -3  -1 2452.24 126.832   3
   0  -3  -1 2570.14 127.787   1
   0  -3   1 2541.19 127.832   2
   0  -3   1 2498.22 127.396   3
   0  -3   1 2543.33 127.839   1
   0   3  -1 2442.16 127.799   2
   0   3  -1 2419.91 127.714   1
   0   3   1 2411.18 126.786   3
   0   3   1 2492.09 127.433   1
   0   3  -1 2444.29 127.394   3
   0   3   1 2448.61 127.838   2
   0   3  -1 2557.06 128.025   1
   0   3   1 2585.73 127.595   1
  -1  -3  -1 3555.67 185.364   1
   1  -3   1 3763.17 186.686   1
  -1  -3  -1 3615.54 185.691   3
  -1  -3  -1 3709.69 185.428   1
  -1  -3  -1 3753.60 186.361   2
   1  -3   1 3698.39 186.814   1
   1  -3   1 3727.11 186.376   3
   1   3   1 3524.62 186.334   2
  -1   3  -1 3580.10 186.560   1
  -1   3  -1 3750.68 186.963   1
   1   3   1 3449.88 185.731   3
  -1   3  -1 3580.22 186.248   3
  -2  -3  -1 1399.31 70.9851   2
   2  -3   1 1353.71 71.4389   3
   2  -3   1 1385.14 71.3870   1
  -2  -3  -1 1310.00 70.7414   3
  -2   3  -1 1332.99 72.7912   1
  -2   3  -1 1387.78 71.4404   3
   2   3   1 1351.26 70.9176   2
  -3  -3  -1 771.469 41.4144   3
   3  -3   1 724.610 40.4989   3
  -3  -3  -1 788.377 39.7272   2
   3  -3   1 757.596 40.0711   1
   3  -3   1 792.445 40.2272   1
   3   3   1 638.888 40.1621   2
  -3   3  -1 676.676 40.2694   1
  -3   3  -1 716.454 39.9993   1
  -3   3  -1 733.270 40.3623   3
  -4  -3  -1 1061.52 57.7150   1
   4  -3   1 1093.50 60.0008   1
   4  -3   1 1160.81 60.3172   1
   4  -3   1 1061.77 61.0590   3
  -4  -3  -1 1134.30 60.5992   3
  -4  -3  -1 1135.73 59.8612   2
  -4   3  -1 1187.63 61.2987   3
  -4   3  -1 1182.72 60.4881   1
  -4   3  -1 1104.48 60.8165   1
   5  -3   1 1481.78 73.1874   1
  -5  -3  -1 1281.57 71.1095   4
  -5  -3  -1 1336.03 70.7904   1
  -5  -3  -1 1416.51 73.0612   2
   5  -3   1 1357.12 70.3683   4
  -5  -3  -1 1310.44 70.8908   1
   5  -3   1 1365.83 73.0456   1
  -5  -3  -1 1402.55 74.2021   3
  -5   3  -1 1475.05 73.8279   1
  -5   3  -1 1430.77 74.7105   3
  -5   3  -1 1251.98 75.7730   1
  -6  -3  -1 292.824 17.6881   1
   6  -3   1 309.039 16.1422   4
   6  -3   1 305.353 19.8958   1
  -6  -3  -1 274.185 17.6744   1
  -6  -3  -1 300.940 17.2541   4
  -6  -3  -1 319.732 21.9220   3
   6  -3   1 315.266 19.7558   1
  -6  -3  -1 323.109 20.4803   2
  -6   3  -1 324.711 20.9908   1
  -6   3  -1 307.451 21.6703   1
  -6   3  -1 315.921 22.1297   3
   7  -3   1 149.641 13.5018   1
   7  -3   1 163.420 13.1834   1
  -7  -3  -1 154.451 9.70042   4
  -7  -3  -1 160.201 13.4618   2
  -7  -3  -1 162.356 11.7211   1
  -7  -3  -1 150.797 15.7070   3
  -7  -3  -1 144.845 11.4356   1
  -7   3  -1 166.530 14.7493   1
  -7   3  -1 167.196 15.4107   3
  -7   3  -1 154.654 15.7450   1
  -8  -3  -1 85.5231 10.2052   1
  -8  -3  -1 88.8456 12.4991   2
   8  -3   1 93.9514 10.5185   1
  -8  -3  -1 79.6139 5.70716   4
  -8  -3  -1 71.8481 12.4738   3
   8  -3   1 79.0526 12.5929   1
  -8  -3  -1 86.5582 9.41807   1
  -8   3  -1 61.3995 12.3810   1
  -8   3  -1 76.1375 12.9124   1
  -8   3  -1 69.1749 13.0138   3
  -9  -3  -1 14.5954 6.54789   1
  -9  -3  -1 7.24949 8.71695   2
  -9  -3  -1 -0.5340 7.30329   1
   9  -3   1 6.12804 5.85015   1
   9  -3   1 4.06304 7.71947   1
  -9  -3  -1 -2.8322 9.48764   3
  -9   3  -1 11.8736 11.2106   1
  -9   3  -1 12.7472 10.8308   3
  -9   3  -1 9.22711 9.02446   1
 -10  -3  -1 58.3003 11.6631   1
 -10  -3  -1 34.5209 13.7057   3
 -10  -3  -1 46.8772 9.73318   1
 -10  -3  -1 52.8211 12.5816   2
  10  -3   1 41.2870 8.36982   1
  10  -3   1 41.3238 7.66022   1
 -10   3  -1 69.5469 16.0829   1
 -10   3  -1 80.9263 13.2830   1
 -11  -3  -1 10.7428 12.9560   1
  11  -3   1 17.4519 6.50289   1
 -11  -3  -1 21.9594 10.0418   1
 -11  -3  -1 28.6889 13.7603   3
 -11  -3  -1 0.90928 13.3672   2
 -11   3  -1 17.5193 12.9025   1
 -11   3  -1 35.1150 14.5323   3
 -12  -3  -1 33.6629 12.7440   1
 -12  -3  -1 50.6880 16.9544   3
 -12   3  -1 46.7282 18.3030   3
 -13  -3  -1 113.070 17.7184   1
 -13  -3  -1 89.2273 22.6249   3
 -13   3  -1 86.6695 19.7724   1
 -13   3  -1 34.8249 21.9551   3
 -14  -3  -1 70.3275 28.3124   3
 -14   3  -1 58.9853 24.2544   1
 -14   3  -1 127.107 29.7166   3
 -14  -4   1 35.4765 22.5473   3
 -14   4   1 16.1424 20.9393   1
 -14   4   1 23.4992 21.7531   3
 -13  -4   1 84.9911 21.4901   3
 -13  -4   1 129.457 21.9753   1
 -13   4   1 101.180 20.3254   1
 -13   4   1 74.1855 20.6205   3
 -12  -4   1 51.3182 15.4540   1
 -12  -4   1 38.8041 16.4619   1
 -12  -4   1 19.3934 15.7581   3
  12  -4  -1 31.6567 8.89324   1
 -12   4   1 55.1508 17.4313   3
 -11  -4   1 201.560 21.3653   1
  11  -4  -1 194.606 17.9861   1
 -11  -4   1 189.955 13.5573   4
  11  -4  -1 190.292 18.5660   1
 -11  -4   1 201.110 18.4116   1
 -11  -4   1 196.371 26.7921   2
 -11   4   1 236.135 23.6812   1
 -11   4   1 208.763 25.4603   3
 -10  -4   1 25.3642 4.95726   4
  10  -4  -1 9.57720 8.32738   1
 -10  -4   1 1.39303 10.5307   2
 -10  -4   1 37.3518 7.70266   1
 -10  -4   1 23.5685 8.90926   1
 -10  -4   1 18.2510 11.1006   3
  10  -4  -1 22.1226 8.64489   1
  10  -4  -1 18.2943 4.65282   4
 -10   4   1 47.8362 13.5264   3
 -10   4   1 42.7079 11.7380   1
  -9  -4   1 187.916 19.0318   2
  -9  -4   1 170.215 19.1674   3
   9  -4  -1 177.185 16.2183   1
  -9  -4   1 182.697 12.2978   4
  -9  -4   1 168.489 13.3530   1
  -9  -4   1 149.754 14.4027   1
   9  -4  -1 171.583 11.5969   4
   9  -4  -1 166.846 15.7427   1
  -9   4   1 162.243 24.7464   3
  -9   4   1 152.735 19.8316   1
  -9   4   1 124.324 16.2883   1
  -8  -4   1 102.152 14.9811   3
  -8  -4   1 133.040 9.55489   4
   8  -4  -1 104.952 8.64939   4
   8  -4  -1 97.8549 12.8524   1
  -8  -4   1 88.1877 9.70558   1
   8  -4  -1 74.4536 11.7452   1
  -8  -4   1 104.657 13.2862   2
  -8   4   1 125.017 15.8897   3
  -8   4   1 115.402 16.2273   1
  -8   4   1 119.720 14.4970   1
  -7  -4   1 357.879 23.5573   2
  -7  -4   1 333.177 20.1820   1
  -7  -4   1 359.766 20.7741   4
   7  -4  -1 357.916 20.0297   4
   7  -4  -1 343.503 22.5546   1
  -7  -4   1 345.090 19.6150   1
   7  -4  -1 371.725 23.7000   1
  -7   4   1 335.775 25.0684   3
  -7   4   1 304.845 24.0352   1
  -7   4   1 356.773 23.6636   1
  -6  -4   1 480.301 27.7618   1
  -6  -4   1 527.166 29.1186   4
  -6  -4   1 487.522 27.3536   1
   6  -4  -1 541.914 31.5553   1
   6  -4  -1 527.410 28.4914   4
  -6  -4   1 496.129 31.1101   2
  -6   4   1 545.074 32.6684   3
  -6   4   1 525.135 32.1008   1
  -6   4   1 551.161 31.4899   1
  -5  -4   1 523.405 28.7854   4
  -5  -4   1 507.028 31.9146   2
   5  -4  -1 547.101 30.8085   1
   5  -4  -1 536.133 28.1617   4
   5  -4  -1 520.318 29.8985   1
  -5  -4   1 498.029 26.6842   1
  -5   4   1 417.391 32.1371   1
  -5   4   1 530.488 30.4306   1
  -5   4   1 524.918 30.9799   3
   4  -4  -1 120.307 8.67075   4
  -4  -4   1 121.562 10.4688   2
  -4  -4   1 126.240 9.53473   4
   4  -4  -1 127.947 11.2986   1
   4  -4  -1 113.744 10.2874   1
  -4   4   1 157.611 11.9208   1
  -4   4   1 159.315 11.3202   1
   3  -4  -1 2282.10 117.402   1
  -3  -4   1 2308.53 116.958   2
   3  -4  -1 2183.71 116.574   1
  -3  -4   1 2112.89 116.252   4
   3   4  -1 2364.18 116.735   2
  -3   4   1 2348.38 116.929   1
  -3   4   1 2126.89 117.120   1
  -2  -4   1 820.128 46.5100   2
   2  -4  -1 821.035 46.3474   1
   2  -4  -1 857.481 47.4937   1
  -2  -4   1 831.883 44.8124   1
  -2  -4   1 822.872 44.9314   1
  -2   4   1 950.405 47.0896   1
  -2   4   1 915.812 47.0890   1
   2   4  -1 938.685 47.0642   2
  -1  -4   1 570.224 30.7581   1
   1  -4  -1 554.854 31.8529   1
  -1  -4   1 566.747 30.9781   1
  -1  -4   1 598.618 31.7500   2
  -1  -4   1 600.538 30.6511   3
   1  -4  -1 577.482 31.4121   1
  -1   4   1 600.969 31.8386   1
  -1   4   1 579.038 31.3966   1
   1   4  -1 590.987 30.8029   1
   1   4  -1 568.639 31.6324   2
   1   4  -1 583.921 30.5399   1
   0  -4   1 1196.58 62.4514   3
   0  -4   1 1173.81 63.3490   1
   0  -4   1 1241.84 63.3097   2
   0  -4  -1 1152.13 62.7377   1
   0  -4  -1 1221.49 63.1846   1
   0  -4   1 1188.15 63.1021   1
   0   4   1 1203.85 62.6656   1
   0   4  -1 1227.02 63.3056   2
   0   4   1 1260.37 62.9258   1
   0   4  -1 1201.03 63.0097   1
   0   4   1 1267.85 63.8577   2
   0   4  -1 1208.65 62.4906   3
   0   4   1 1168.71 61.7570   3
   0   4  -1 1235.85 63.4188   1
   1  -4   1 3323.77 167.040   3
  -1  -4  -1 3198.71 166.114   3
  -1  -4  -1 3205.72 166.348   1
  -1  -4  -1 3366.03 167.376   2
  -1  -4  -1 3184.08 166.214   1
   1  -4   1 3323.93 167.598   1
  -1   4  -1 3189.09 166.889   3
   1   4   1 3230.71 167.401   2
  -1   4  -1 3357.75 167.962   1
  -1   4  -1 3256.93 167.129   2
   2  -4   1 1799.31 98.0511   3
  -2  -4  -1 1786.91 97.2377   3
  -2  -4  -1 1895.43 97.9488   2
   2  -4   1 1864.10 98.3106   1
   2  -4   1 1959.95 98.6860   1
  -2   4  -1 2030.76 98.5236   1
  -2   4  -1 1877.16 98.7597   1
   3  -4   1 1014.51 52.3727   1
  -3  -4  -1 978.438 51.6275   2
   3  -4   1 877.243 52.0248   3
   3  -4   1 944.950 52.0195   1
   3   4   1 1017.18 51.7067   2
  -3   4  -1 995.718 52.2143   1
  -3   4  -1 993.427 52.1596   3
  -3   4  -1 888.136 52.3527   1
  -4  -4  -1 2936.76 150.361   2
   4  -4   1 2659.58 151.203   3
  -4  -4  -1 2948.94 150.638   3
   4  -4   1 3084.05 150.997   1
   4  -4   1 2824.49 150.585   1
  -4   4  -1 2809.27 151.781   1
  -4   4  -1 2985.17 150.964   1
  -4   4  -1 2976.69 151.248   3
  -5  -4  -1 461.160 26.3779   2
   5  -4   1 440.904 26.6559   1
  -5  -4  -1 436.440 23.0805   1
   5  -4   1 432.152 26.7278   1
  -5  -4  -1 447.719 27.0469   3
  -5  -4  -1 428.692 23.2296   1
  -5   4  -1 458.669 27.0223   1
  -5   4  -1 449.124 27.6877   3
  -5   4  -1 402.667 27.4783   1
   6  -4   1 559.360 28.9258   4
   6  -4   1 516.661 32.6273   1
  -6  -4  -1 537.170 32.7285   2
  -6  -4  -1 521.431 29.3300   1
  -6  -4  -1 575.798 33.9283   3
   6  -4   1 565.116 32.4955   1
  -6  -4  -1 529.388 29.2160   1
  -6   4  -1 552.338 34.2527   1
  -6   4  -1 555.123 33.2144   1
  -6   4  -1 566.194 34.2450   3
  -7  -4  -1 465.699 28.3631   2
  -7  -4  -1 402.324 24.9247   1
   7  -4   1 451.876 23.3888   4
  -7  -4  -1 429.646 25.0642   1
   7  -4   1 462.755 28.1010   1
  -7  -4  -1 461.527 29.8310   3
   7  -4   1 458.766 27.7310   1
  -7   4  -1 437.681 30.1143   3
  -7   4  -1 475.744 29.0583   1
  -7   4  -1 419.218 29.6151   1
  -8  -4  -1 126.823 14.6875   2
  -8  -4  -1 126.153 15.8110   3
  -8  -4  -1 103.376 9.12597   4
   8  -4   1 125.928 12.7763   1
  -8  -4  -1 113.198 10.8003   1
   8  -4   1 122.138 15.8609   1
  -8  -4  -1 120.915 10.7201   1
  -8   4  -1 90.4923 15.3991   1
  -8   4  -1 103.476 15.7459   3
  -8   4  -1 106.501 14.7690   1
  -9  -4  -1 5.02736 11.6573   1
   9  -4   1 13.7561 8.18731   1
  -9  -4  -1 17.3312 9.18981   2
   9  -4   1 3.93636 7.06928   1
  -9  -4  -1 15.2189 5.80843   1
  -9  -4  -1 4.72382 2.55811   4
  -9  -4  -1 11.9684 9.54635   3
  -9   4  -1 -5.7653 8.80877   3
  -9   4  -1 -14.874 8.75673   1
  -9   4  -1 10.9039 12.2829   1
  10  -4   1 54.2602 9.22433   1
 -10  -4  -1 38.9142 14.4468   3
 -10  -4  -1 41.0103 9.20809   1
 -10  -4  -1 23.7852 13.2156   2
  10  -4   1 32.0594 9.88991   1
 -10   4  -1 47.1251 12.8122   1
 -11  -4  -1 16.3097 9.63815   1
  11  -4   1 15.6051 7.95117   1
 -11  -4  -1 13.3827 13.5390   3
 -11  -4  -1 -10.579 15.0741   2
 -11  -4  -1 2.17020 12.5146   1
 -11   4  -1 15.2223 13.2598   3
 -11   4  -1 28.9487 12.4458   1
 -12  -4  -1 150.263 20.4092   1
 -12  -4  -1 115.658 21.9488   3
 -12   4  -1 126.668 21.3374   3
 -12   4  -1 136.130 21.0438   1
 -13  -4  -1 -1.2022 14.9845   1
 -13  -4  -1 8.27987 18.7866   3
 -13   4  -1 41.4269 18.5825   1
 -13   4  -1 9.19864 19.3831   3
 -14  -4  -1 15.2366 25.8506   3
 -14   4  -1 30.2067 23.3521   1
 -14   4  -1 30.1251 28.5358   3
 -14  -5   1 85.1786 24.6888   3
 -14   5   1 63.9131 24.3789   3
 -14   5   1 67.4079 21.9608   1
 -13  -5   1 32.9185 19.3795   3
 -13  -5   1 53.4574 14.2091   1
 -13   5   1 39.1910 17.3633   1
 -13   5   1 49.4024 20.7858   3
  12  -5  -1 31.3543 10.6654   1
 -12  -5   1 31.4507 10.7844   1
 -12  -5   1 33.4495 6.21838   4
 -12  -5   1 56.0580 18.2732   3
 -12  -5   1 49.7299 19.3415   1
 -12   5   1 19.1803 14.7477   1
 -12   5   1 22.9240 16.1495   3
  11  -5  -1 29.8703 11.3170   1
 -11  -5   1 34.6791 11.0060   1
  11  -5  -1 30.3155 10.8158   1
 -11  -5   1 31.7770 9.07061   1
 -11  -5   1 39.8937 6.40501   4
  11  -5  -1 36.0476 5.13125   4
 -11   5   1 4.81848 13.2606   3
 -11   5   1 64.1625 15.2626   1
 -10  -5   1 50.6469 13.4663   3
  10  -5  -1 48.8416 7.90252   4
  10  -5  -1 39.2290 10.7765   1
 -10  -5   1 70.6939 8.88504   4
  10  -5  -1 61.9072 11.4995   1
 -10  -5   1 72.1779 10.2019   1
 -10  -5   1 30.1479 12.7411   2
 -10   5   1 70.6034 18.1846   1
 -10   5   1 67.8440 13.3567   1
 -10   5   1 63.4000 15.1030   3
  -9  -5   1 278.699 24.9734   3
   9  -5  -1 320.139 23.0778   1
  -9  -5   1 316.291 25.2987   2
   9  -5  -1 267.905 22.1621   1
  -9  -5   1 295.403 19.8161   1
  -9  -5   1 315.356 19.0685   4
   9  -5  -1 303.527 18.0976   4
  -9  -5   1 313.665 19.0195   1
  -9   5   1 280.473 25.9182   1
  -9   5   1 284.316 25.7679   3
  -9   5   1 265.432 24.3113   1
  -8  -5   1 459.551 24.9663   4
   8  -5  -1 450.038 24.0751   4
  -8  -5   1 398.413 23.5199   1
  -8  -5   1 408.866 28.2771   2
  -8  -5   1 441.093 29.8665   3
   8  -5  -1 423.123 28.2031   1
  -8  -5   1 403.065 24.2005   1
   8  -5  -1 418.413 27.4074   1
  -8   5   1 416.633 30.1565   3
  -8   5   1 430.517 28.6221   1
  -8   5   1 330.895 29.5346   1
   7  -5  -1 854.638 47.2961   1
  -7  -5   1 858.321 44.4595   4
  -7  -5   1 771.405 42.8612   1
  -7  -5   1 813.390 47.2866   2
  -7  -5   1 793.443 42.4082   1
   7  -5  -1 808.488 46.2600   1
   7  -5  -1 842.511 43.6531   4
  -7   5   1 813.631 47.1499   1
  -7   5   1 802.977 48.1817   3
  -7   5   1 739.725 47.7086   1
  -6  -5   1 20.7858 6.46520   2
  -6  -5   1 17.1674 4.61084   4
   6  -5  -1 9.62588 3.65492   4
   6  -5  -1 11.7973 6.54887   1
   6  -5  -1 9.32576 5.82359   1
  -6  -5   1 13.7467 2.32050   1
  -6   5   1 4.04073 6.15912   1
  -6   5   1 -2.5495 6.25784   3
  -6   5   1 10.7090 6.89836   1
   5  -5  -1 833.721 44.1667   1
  -5  -5   1 836.540 43.7558   2
   5  -5  -1 717.146 43.1541   1
   5  -5  -1 743.558 41.0359   4
  -5  -5   1 783.974 41.8940   4
  -5   5   1 722.390 43.5174   3
  -5   5   1 775.540 43.5711   1
  -5   5   1 701.750 43.9194   1
   4  -5  -1 221.077 15.5839   1
  -4  -5   1 221.845 14.9937   4
  -4  -5   1 222.600 15.9061   2
   4  -5  -1 246.765 17.3154   1
  -4   5   1 229.100 16.6288   3
  -4   5   1 230.235 18.1823   1
  -4   5   1 249.547 16.5654   1
  -3  -5   1 886.480 46.9437   1
  -3  -5   1 904.030 49.8574   2
   3  -5  -1 887.093 49.5563   1
   3  -5  -1 939.507 50.6091   1
  -3  -5   1 868.583 47.0034   1
  -3  -5   1 887.196 49.1677   4
  -3   5   1 898.934 50.3068   1
  -3   5   1 980.876 50.0103   1
   3   5  -1 998.236 49.8946   2
  -3   5   1 913.726 50.6095   3
   2  -5  -1 659.934 39.0137   1
   2  -5  -1 760.900 40.2856   1
  -2  -5   1 694.403 37.7493   1
  -2  -5   1 702.191 39.3551   2
  -2  -5   1 698.869 37.5179   1
   2   5  -1 784.404 39.6948   2
  -2   5   1 769.195 39.4908   1
  -2   5   1 673.761 39.5668   1
  -1  -5   1 16.8119 3.26397   1
   1  -5  -1 21.8904 4.85804   1
  -1  -5   1 18.2619 2.78688   3
  -1  -5   1 23.5552 3.35077   1
  -1  -5   1 21.4277 3.99877   2
   1   5  -1 27.8858 4.74351   2
  -1   5   1 24.5661 4.36964   1
   1   5  -1 30.0687 3.69819   1
   1   5  -1 29.2128 3.22414   1
   0  -5  -1 3052.55 152.432   1
   0  -5   1 2920.01 152.567   1
   0  -5  -1 2924.79 151.827   1
   0  -5   1 2995.93 152.210   1
   0  -5   1 2908.36 152.315   2
   0  -5   1 2876.23 151.213   3
   0   5  -1 3047.12 153.750   2
   0   5   1 3070.24 151.968   1
   0   5   1 3134.24 152.706   2
   0   5  -1 2842.38 151.235   3
   0   5  -1 2876.50 151.942   1
   0   5   1 2914.62 151.598   1
   0   5  -1 2939.68 152.422   1
   1  -5   1 1591.62 79.3062   1
  -1  -5  -1 1510.56 78.7549   2
  -1  -5  -1 1472.92 76.7841   3
   1  -5   1 1458.48 77.8912   3
  -1  -5  -1 1524.17 77.7151   1
  -1  -5  -1 1468.26 77.3863   1
   1  -5   1 1489.36 78.7384   1
  -1   5  -1 1592.81 78.7877   1
   1   5   1 1507.80 76.7369   1
  -1   5  -1 1465.98 79.1071   1
   1   5   1 1601.91 78.9731   2
  -1   5  -1 1486.87 79.4580   2
  -1   5  -1 1439.35 77.7713   3
   1   5   1 1417.59 76.6005   1
   2  -5   1 23.6832 4.11782   3
   2  -5   1 27.2741 4.74776   1
  -2  -5  -1 16.0066 2.15529   1
  -2  -5  -1 19.5765 3.32625   3
  -2  -5  -1 19.8144 4.03302   2
   2  -5   1 25.4412 5.18733   1
  -2  -5  -1 21.5551 2.30708   1
   2   5   1 14.0907 4.26748   2
  -2   5  -1 17.1107 4.68227   1
  -2   5  -1 31.9479 5.22181   1
   3  -5   1 3474.50 172.331   1
   3  -5   1 3262.22 171.800   1
   3  -5   1 3164.08 171.655   3
  -3  -5  -1 3363.89 171.440   2
  -3   5  -1 3423.61 171.941   1
  -3   5  -1 3405.83 171.615   3
   3   5   1 3357.03 171.413   2
  -3   5  -1 3124.12 172.269   1
   4  -5   1 229.135 16.4232   1
  -4  -5  -1 207.031 15.6783   2
  -4  -5  -1 226.809 15.6538   3
  -4   5  -1 255.455 16.6939   3
   4   5   1 239.016 15.7639   2
  -4   5  -1 243.893 16.5462   1
  -4   5  -1 222.316 16.8686   1
  -5  -5  -1 1520.40 91.0144   2
   5  -5   1 1619.51 89.9650   1
   5  -5   1 1729.70 90.2829   1
  -5  -5  -1 1732.28 90.1436   3
  -5  -5  -1 1581.26 88.2771   4
  -5   5  -1 1825.38 90.7305   1
  -5   5  -1 1811.03 91.1199   3
  -5   5  -1 1701.62 91.3217   1
   6  -5   1 1464.80 78.6327   1
  -6  -5  -1 1452.55 76.4026   4
  -6  -5  -1 1416.76 74.5151   1
  -6  -5  -1 1390.54 74.6391   1
  -6  -5  -1 1415.81 78.2195   2
  -6  -5  -1 1459.26 79.0286   3
   6  -5   1 1427.61 75.1906   4
   6  -5   1 1489.75 78.6438   1
  -6   5  -1 1507.98 79.8948   3
  -6   5  -1 1531.42 79.3012   1
  -6   5  -1 1428.36 80.1499   1
   7  -5   1 337.065 23.8438   1
   7  -5   1 343.498 23.4076   1
  -7  -5  -1 340.509 19.2299   1
  -7  -5  -1 341.043 23.2414   2
   7  -5   1 368.279 18.8502   4
  -7  -5  -1 334.262 19.2492   1
  -7  -5  -1 344.094 20.4391   4
  -7  -5  -1 369.629 24.8141   3
  -7   5  -1 318.047 24.8507   3
  -7   5  -1 332.125 24.0425   1
  -7   5  -1 278.046 25.2921   1
  -8  -5  -1 38.0552 5.65727   4
  -8  -5  -1 36.8442 10.5810   3
   8  -5   1 49.4278 9.91111   1
   8  -5   1 42.1842 8.80630   1
   8  -5   1 32.2112 4.00976   4
  -8  -5  -1 23.7723 9.13289   2
  -8  -5  -1 36.2813 5.94276   1
   8  -5   1 31.0320 3.83697   4
  -8   5  -1 57.8551 11.7023   3
  -8   5  -1 58.2315 12.5146   1
  -8   5  -1 52.3392 11.0824   1
   9  -5   1 -0.6514 9.43279   1
  -9  -5  -1 -1.0873 9.08379   3
  -9  -5  -1 2.25281 4.54367   4
  -9  -5  -1 1.05101 5.36932   1
  -9  -5  -1 -2.0768 9.66571   2
   9  -5   1 5.29159 7.74905   1
  -9  -5  -1 2.18758 6.10930   1
  -9   5  -1 16.7064 10.5993   3
  -9   5  -1 -0.6179 9.57902   1
  -9   5  -1 28.8714 14.2615   1
 -10  -5  -1 26.5803 12.4067   3
 -10  -5  -1 19.6963 4.10723   4
 -10  -5  -1 17.1200 12.8780   2
  10  -5   1 8.68146 8.94940   1
 -10  -5  -1 39.6322 8.09591   1
 -10  -5  -1 25.7580 9.30940   1
  10  -5   1 12.5052 10.4253   1
 -10   5  -1 43.9048 12.7704   1
 -10   5  -1 17.7931 15.1992   3
 -11  -5  -1 73.0871 13.7082   1
  11  -5   1 56.8875 11.0518   1
 -11  -5  -1 90.6111 14.7649   1
  11  -5   1 55.1952 12.8522   1
 -11  -5  -1 95.8302 17.7630   2
 -11  -5  -1 49.1926 16.3792   3
 -11   5  -1 39.4634 15.5699   3
 -12  -5  -1 63.2881 13.4307   1
  12  -5   1 44.2147 10.5534   1
 -12  -5  -1 50.4057 17.5413   3
 -12   5  -1 30.1055 14.8912   1
 -12   5  -1 53.9563 18.2658   3
 -13  -5  -1 152.480 27.6754   3
 -13   5  -1 209.376 32.8813   3
 -13   5  -1 193.525 27.8100   1
 -14  -5  -1 71.9623 29.0320   3
 -14   5  -1 170.317 37.6055   3
 -14  -6   1 16.3004 22.4800   3
 -14   6   1 13.0459 21.3595   1
 -14   6   1 40.4088 23.7417   3
  13  -6  -1 119.778 20.9796   1
 -13  -6   1 128.430 23.0742   3
 -13   6   1 173.832 29.5159   3
 -13   6   1 97.9360 20.9352   1
  12  -6  -1 5.63356 11.8214   1
 -12  -6   1 -3.5787 15.2172   3
 -12  -6   1 12.2490 9.78085   1
 -12  -6   1 13.5075 6.25041   4
 -12   6   1 -0.9649 14.5959   1
 -12   6   1 44.1740 16.5334   3
  11  -6  -1 96.7698 10.0178   4
  11  -6  -1 96.7498 14.6153   1
 -11  -6   1 104.310 13.3902   1
 -11  -6   1 94.0382 13.7505   1
  11  -6  -1 104.323 15.9922   1
 -11  -6   1 100.359 11.6072   4
 -11   6   1 128.321 19.7973   3
  10  -6  -1 97.4401 10.2100   4
 -10  -6   1 127.467 19.4607   3
 -10  -6   1 90.6787 11.4585   4
  10  -6  -1 123.924 17.9510   1
 -10  -6   1 97.7369 11.7043   1
  10  -6  -1 105.996 17.2824   1
 -10  -6   1 97.2200 13.3755   1
 -10  -6   1 113.703 17.9293   2
 -10   6   1 142.523 18.9697   1
 -10   6   1 122.564 20.0356   3
  -9  -6   1 16.4356 5.87088   4
  -9  -6   1 24.2110 5.74366   1
   9  -6  -1 9.65512 5.04110   4
  -9  -6   1 17.2835 10.9452   2
   9  -6  -1 27.8062 9.78533   1
   9  -6  -1 15.2250 9.83186   1
  -9  -6   1 18.3743 8.01297   1
  -9  -6   1 6.11643 10.2506   3
  -9   6   1 9.79591 9.59669   1
  -9   6   1 0.30448 12.3011   1
  -9   6   1 7.98592 10.6060   3
   8  -6  -1 583.878 31.9016   4
  -8  -6   1 575.026 36.4212   2
  -8  -6   1 576.080 36.9606   3
   8  -6  -1 509.352 35.1598   1
  -8  -6   1 613.650 33.0076   4
  -8  -6   1 523.716 30.4845   1
  -8  -6   1 525.963 31.1060   1
   8  -6  -1 595.017 36.5519   1
  -8   6   1 607.493 38.0920   3
  -8   6   1 585.783 36.5941   1
  -8   6   1 567.752 38.5677   1
  -7  -6   1 27.9760 6.17609   4
   7  -6  -1 22.5597 10.7881   1
  -7  -6   1 35.0252 8.66827   2
  -7  -6   1 26.3783 4.29041   1
  -7  -6   1 23.9990 8.16308   3
   7  -6  -1 30.6657 5.25448   4
   7  -6  -1 28.2054 8.01645   1
  -7  -6   1 29.8151 3.31419   1
  -7   6   1 32.4164 9.14483   3
  -7   6   1 29.9930 9.49700   1
  -7   6   1 39.0188 9.14153   1
   6  -6  -1 203.309 13.8447   4
  -6  -6   1 192.515 16.9067   2
  -6  -6   1 203.087 14.9423   4
   6  -6  -1 185.985 16.1527   1
   6  -6  -1 197.071 17.3284   1
  -6   6   1 248.783 17.6612   1
  -6   6   1 245.638 17.8740   3
  -6   6   1 215.034 18.2384   1
  -5  -6   1 33.7143 7.36559   2
   5  -6  -1 26.7249 6.60113   1
   5  -6  -1 38.0943 8.29020   1
  -5  -6   1 33.4377 5.72988   4
  -5   6   1 32.1139 7.04105   3
  -5   6   1 33.5421 7.22060   1
  -5   6   1 26.2606 7.59016   1
  -4  -6   1 714.722 45.6493   2
  -4  -6   1 759.324 42.9370   4
   4  -6  -1 830.234 45.1776   1
   4  -6  -1 752.418 43.7858   1
  -4   6   1 827.083 44.2071   1
   4   6  -1 820.631 43.8083   2
  -4   6   1 714.439 44.3245   1
  -4   6   1 814.172 43.6377   3
  -3  -6   1 260.396 14.2350   1
  -3  -6   1 256.802 13.9794   1
   3  -6  -1 236.782 16.6776   1
  -3  -6   1 261.507 16.5487   4
  -3  -6   1 269.949 17.2586   2
   3  -6  -1 249.248 17.9696   1
  -3   6   1 238.260 17.6740   1
   3   6  -1 278.907 16.9468   2
  -3   6   1 246.124 16.9255   1
  -3   6   1 237.538 16.0289   3
  -2  -6   1 691.041 37.9563   2
   2  -6  -1 668.981 37.5854   1
  -2  -6   1 680.209 35.9670   1
   2  -6  -1 729.248 38.9341   1
  -2  -6   1 667.745 36.3034   1
  -2   6   1 640.442 37.9739   1
  -2   6   1 694.840 37.7705   1
  -2   6   1 633.547 36.2445   3
   2   6  -1 710.864 38.0282   2
   1  -6  -1 1597.67 85.8526   1
  -1  -6   1 1601.70 85.2257   1
  -1  -6   1 1618.88 84.3916   3
   1  -6  -1 1749.80 86.9478   1
  -1  -6   1 1595.59 86.2128   2
  -1  -6   1 1593.74 85.6326   1
   1   6  -1 1811.94 86.7754   2
   1   6  -1 1573.14 84.7440   1
  -1   6   1 1541.61 84.1300   3
  -1   6   1 1759.98 85.9657   1
   1   6  -1 1611.43 85.1464   1
  -1   6   1 1674.74 86.3219   1
   0  -6   1 919.651 50.1870   1
   0  -6   1 957.834 50.6058   2
   0  -6  -1 901.034 50.7793   1
   0  -6   1 923.849 48.9747   3
   0  -6  -1 918.429 49.8589   1
   0  -6   1 975.919 50.8708   1
   0   6  -1 981.740 50.8064   2
   0   6  -1 946.604 50.5725   1
   0   6   1 958.393 49.9162   1
   0   6   1 902.036 49.5124   1
   0   6  -1 906.002 49.0078   3
   0   6   1 1014.41 50.9964   2
   0   6  -1 938.981 51.1830   1
   1  -6   1 1298.18 69.6070   1
   1  -6   1 1376.55 70.2767   1
  -1  -6  -1 1254.50 68.2158   1
  -1  -6  -1 1289.76 67.0703   3
  -1  -6  -1 1256.79 69.4046   2
   1  -6   1 1311.14 68.5466   3
  -1  -6  -1 1295.71 68.6758   1
  -1   6  -1 1321.08 70.1206   1
  -1   6  -1 1264.62 68.3511   3
   1   6   1 1445.15 70.1442   2
   1   6   1 1321.53 67.4642   1
  -1   6  -1 1379.02 69.6347   1
   1   6   1 1250.59 67.3630   1
  -1   6  -1 1343.92 69.5139   2
   2  -6   1 1682.18 88.3785   1
  -2  -6  -1 1597.34 85.6806   3
  -2  -6  -1 1616.57 87.4156   2
  -2  -6  -1 1611.87 85.5557   1
   2  -6   1 1549.31 86.9230   3
   2  -6   1 1579.86 87.6849   1
  -2  -6  -1 1566.39 85.3411   1
   2   6   1 1848.56 88.1264   2
  -2   6  -1 1677.28 88.4635   1
  -2   6  -1 1812.88 87.3413   3
  -2   6  -1 1768.70 87.9079   1
   3  -6   1 391.647 24.3947   3
  -3  -6  -1 406.564 24.4150   2
  -3  -6  -1 394.685 23.3968   3
   3  -6   1 436.200 25.6466   1
  -3  -6  -1 411.667 21.0576   1
  -3  -6  -1 395.484 21.0273   1
  -3   6  -1 439.815 24.5073   3
  -3   6  -1 341.603 26.8501   1
  -3   6  -1 429.680 25.0382   1
   3   6   1 416.989 24.5858   2
   4  -6   1 793.652 43.2732   1
  -4  -6  -1 759.156 41.4252   3
   4  -6   1 735.083 42.4796   1
  -4  -6  -1 697.416 43.4650   2
  -4   6  -1 784.316 42.9233   1
   4   6   1 763.924 42.0420   2
  -4   6  -1 699.136 43.4009   1
  -4   6  -1 750.672 42.2942   3
  -5  -6  -1 324.397 22.3009   2
   5  -6   1 352.368 23.3553   1
  -5  -6  -1 351.739 21.9058   3
   5  -6   1 329.261 22.8568   1
  -5   6  -1 341.705 23.2029   1
  -5   6  -1 322.261 23.7675   1
  -5   6  -1 366.193 23.2127   3
  -6  -6  -1 492.037 30.9518   3
   6  -6   1 494.424 30.9449   1
  -6  -6  -1 491.941 30.8845   2
  -6  -6  -1 472.109 25.6125   1
   6  -6   1 502.495 31.2289   1
  -6  -6  -1 498.687 28.7288   4
  -6   6  -1 516.498 31.4986   1
  -6   6  -1 524.660 32.0622   3
  -6   6  -1 450.307 32.7319   1
  -7  -6  -1 41.0824 4.85533   1
  -7  -6  -1 55.1976 7.84088   4
   7  -6   1 35.3468 5.74329   4
  -7  -6  -1 39.7847 9.27702   3
   7  -6   1 30.7221 8.97636   1
   7  -6   1 38.6088 9.32045   1
  -7  -6  -1 42.2196 4.57013   1
  -7  -6  -1 44.1462 9.68031   2
  -7   6  -1 38.8487 9.71524   1
  -7   6  -1 37.7986 11.8618   1
  -7   6  -1 53.7971 10.6979   3
   8  -6   1 51.1865 10.5553   1
  -8  -6  -1 51.5305 11.3248   3
  -8  -6  -1 56.2233 11.7275   2
   8  -6   1 66.3264 11.8240   1
   8  -6   1 62.3132 6.01451   4
  -8  -6  -1 53.2065 6.98529   1
  -8  -6  -1 45.3530 6.91873   1
  -8  -6  -1 68.6485 8.42398   4
  -8   6  -1 47.6265 11.6497   1
  -8   6  -1 54.1071 12.1292   3
  -8   6  -1 59.9644 14.3670   1
  -9  -6  -1 59.4914 12.7025   3
  -9  -6  -1 67.8882 8.48151   4
   9  -6   1 64.7001 11.6904   1
   9  -6   1 35.3539 12.0419   1
  -9  -6  -1 58.3627 9.09085   1
  -9  -6  -1 68.1281 9.74146   1
  -9  -6  -1 50.2575 13.5155   2
  -9   6  -1 38.8269 12.3674   1
  -9   6  -1 52.4552 13.4641   3
 -10  -6  -1 124.535 12.7357   1
 -10  -6  -1 112.265 9.85831   4
  10  -6   1 88.6174 15.3644   1
 -10  -6  -1 129.704 19.3291   3
 -10  -6  -1 114.650 17.1715   1
 -10  -6  -1 90.9023 17.1162   2
  10  -6   1 118.185 16.7205   1
 -10   6  -1 96.6153 17.6328   3
 -10   6  -1 95.4593 16.7419   1
 -11  -6  -1 11.8572 13.7313   3
  11  -6   1 1.50045 10.2269   1
  11  -6   1 18.3460 13.4953   1
 -11  -6  -1 -3.2263 11.3066   1
 -11  -6  -1 1.64311 3.50306   4
 -11  -6  -1 -5.1491 8.40083   1
 -11   6  -1 7.99653 13.5336   1
 -11   6  -1 -7.5264 13.2566   3
  12  -6   1 133.642 19.0521   1
 -12  -6  -1 82.6157 20.8821   3
 -12  -6  -1 114.372 15.0871   1
 -12   6  -1 83.2999 20.3151   1
 -12   6  -1 132.052 22.8842   3
 -13  -6  -1 52.2045 21.3432   3
 -13   6  -1 2.45475 21.1126   3
 -13   6  -1 31.8745 19.4637   1
 -14  -7   1 80.6651 25.5183   3
 -14   7   1 69.4262 25.8688   3
 -14   7   1 41.9380 24.9074   1
  13  -7  -1 -22.381 14.5081   1
 -13  -7   1 -14.533 18.3894   3
 -13   7   1 12.8013 17.3652   1
 -13   7   1 -9.5397 18.7487   3
 -12  -7   1 101.549 20.9383   3
 -12  -7   1 125.420 13.7830   4
  12  -7  -1 100.258 17.1204   1
 -12   7   1 87.8973 20.3663   3
 -12   7   1 181.252 26.5606   1
 -11  -7   1 148.342 14.2548   4
 -11  -7   1 139.539 14.1918   1
  11  -7  -1 134.584 19.3833   1
  11  -7  -1 157.120 21.3201   1
  11  -7  -1 144.871 12.4648   4
 -11  -7   1 139.641 20.0943   1
 -11   7   1 110.055 18.5510   1
 -11   7   1 108.400 20.0549   3
 -10  -7   1 45.6182 8.34902   4
  10  -7  -1 21.4685 12.8751   1
 -10  -7   1 54.9546 14.5118   3
 -10  -7   1 43.2540 7.83587   1
 -10  -7   1 58.6228 8.66160   1
  10  -7  -1 44.1622 12.8080   1
  10  -7  -1 39.1626 7.28435   4
 -10   7   1 22.6040 13.3181   3
 -10   7   1 66.1195 14.7290   1
   9  -7  -1 69.1870 13.3600   1
  -9  -7   1 76.0353 14.3606   2
  -9  -7   1 60.1363 8.73856   1
   9  -7  -1 51.9565 12.0249   1
   9  -7  -1 49.4706 7.47125   4
  -9  -7   1 60.1988 7.06824   1
  -9  -7   1 58.3029 14.0140   3
  -9  -7   1 59.0530 8.88884   4
  -9   7   1 47.7506 13.3490   3
  -9   7   1 23.6874 15.6807   1
  -9   7   1 69.9477 13.4312   1
   8  -7  -1 11.7868 9.06552   1
  -8  -7   1 11.6098 2.81227   1
  -8  -7   1 10.5468 3.72192   1
   8  -7  -1 14.9410 9.91720   1
  -8  -7   1 10.0979 9.80643   2
   8  -7  -1 8.21229 5.21481   4
  -8  -7   1 9.42001 5.99141   4
  -8  -7   1 9.63458 9.86600   3
  -8   7   1 14.2540 11.6997   1
  -8   7   1 16.2707 9.73030   3
  -8   7   1 4.71999 9.11176   1
  -7  -7   1 81.5214 6.17763   1
  -7  -7   1 105.004 14.0890   3
   7  -7  -1 93.6301 13.9728   1
   7  -7  -1 96.0988 14.1051   1
  -7  -7   1 101.020 10.9694   4
  -7  -7   1 117.749 14.4206   2
   7  -7  -1 85.1777 9.52644   4
  -7   7   1 104.048 15.6555   1
  -7   7   1 125.183 14.8241   3
   6  -7  -1 122.971 14.1020   1
   6  -7  -1 111.926 10.1890   4
  -6  -7   1 138.021 14.2743   2
   6  -7  -1 143.400 15.5349   1
  -6  -7   1 125.249 11.3936   4
  -6   7   1 118.467 13.3763   3
  -6   7   1 119.594 13.4691   1
  -6   7   1 100.493 15.2301   1
   5  -7  -1 6.28118 6.13924   1
  -5  -7   1 12.9955 5.41855   4
   5  -7  -1 14.8755 7.45362   1
  -5  -7   1 27.2819 7.35695   2
  -5   7   1 31.4981 7.30406   1
  -5   7   1 14.0754 7.35216   1
  -5   7   1 21.8507 6.65066   3
   4  -7  -1 1213.29 68.5137   1
  -4  -7   1 1283.81 68.2431   4
  -4  -7   1 1252.47 68.9259   2
  -4  -7   1 1248.21 65.1313   1
   4  -7  -1 1391.53 70.4268   1
  -4  -7   1 1277.97 64.9654   1
  -4   7   1 1252.32 67.9277   3
  -4   7   1 1196.11 69.4908   1
   4   7  -1 1238.94 68.4932   2
  -4   7   1 1292.74 69.0463   1
  -3  -7   1 629.818 34.1775   1
  -3  -7   1 647.175 37.6470   2
  -3  -7   1 609.595 34.4912   1
   3  -7  -1 671.582 38.5818   1
   3  -7  -1 614.873 36.8351   1
  -3  -7   1 623.643 36.6718   4
  -3   7   1 644.621 36.6609   3
  -3   7   1 670.631 37.3262   1
   3   7  -1 711.142 37.5233   2
   2  -7  -1 60.7677 9.64462   1
  -2  -7   1 69.9433 5.74115   3
  -2  -7   1 68.0740 8.26935   2
  -2  -7   1 76.9074 6.17086   1
   2  -7  -1 68.9815 7.89852   1
  -2  -7   1 75.4543 6.83346   1
  -2   7   1 60.9591 6.03010   3
  -2   7   1 69.1551 8.87888   1
  -2   7   1 70.7915 8.27643   1
   2   7  -1 66.6306 8.34292   2
  -1  -7   1 714.262 36.9028   3
   1  -7  -1 736.642 39.0176   1
  -1  -7   1 715.576 40.3930   1
  -1  -7   1 717.374 38.2397   1
   1  -7  -1 787.717 40.2879   1
  -1  -7   1 728.221 39.4766   2
  -1   7   1 684.813 39.1277   1
  -1   7   1 698.476 38.6433   1
   1   7  -1 707.922 39.4447   2
   1   7  -1 648.399 37.4151   1
  -1   7   1 647.066 36.5125   3
  -1   7   1 726.273 39.3885   2
   1   7  -1 646.720 37.8554   1
   0  -7   1 859.727 46.2667   1
   0  -7   1 804.023 43.8746   3
   0  -7  -1 870.640 46.1270   1
   0  -7   1 815.273 45.4489   1
   0  -7  -1 781.421 45.0319   1
   0  -7   1 808.143 45.7478   2
   0   7  -1 883.961 45.3033   1
   0   7  -1 822.326 45.7266   1
   0   7  -1 815.591 43.9587   3
   0   7   1 824.536 45.0644   1
   0   7  -1 905.576 46.3919   2
   0   7   1 880.499 46.3123   2
   1  -7   1 402.947 24.1875   1
   1  -7   1 394.508 22.7010   3
  -1  -7  -1 404.812 24.1292   2
  -1  -7  -1 395.418 23.4492   1
  -1  -7  -1 406.299 22.8034   1
   1  -7   1 428.015 24.9912   1
  -1   7  -1 442.155 24.3811   2
  -1   7  -1 384.589 24.6576   1
   1   7   1 385.642 21.6688   1
   1   7   1 424.507 24.6936   2
  -1   7  -1 416.619 24.1329   1
   1   7   1 417.093 21.8692   1
  -1   7  -1 385.477 22.5671   3
   2  -7   1 170.736 12.3757   3
  -2  -7  -1 184.430 13.2660   2
  -2  -7  -1 176.045 11.3852   1
   2  -7   1 173.565 14.7152   1
  -2  -7  -1 171.663 10.5841   3
  -2  -7  -1 169.678 10.9121   1
   2   7   1 192.309 13.7709   2
  -2   7  -1 178.862 12.3847   3
  -2   7  -1 161.294 14.2185   1
  -2   7  -1 197.210 13.9797   1
  -2   7  -1 207.887 13.5093   2
   3  -7   1 637.739 34.0982   1
   3  -7   1 555.071 33.1392   1
  -3  -7  -1 555.146 29.6605   1
   3  -7   1 539.977 32.1933   3
  -3  -7  -1 549.203 30.6092   3
  -3  -7  -1 569.748 29.3132   1
  -3   7  -1 555.937 31.9299   3
   3   7   1 553.504 32.6204   2
  -3   7  -1 502.395 33.3465   1
  -3   7  -1 564.162 33.0196   1
   4  -7   1 780.614 47.1066   1
  -4  -7  -1 826.474 46.6279   2
  -4  -7  -1 841.599 45.5092   3
   4  -7   1 815.141 47.7820   1
  -4   7  -1 858.326 46.6446   3
  -4   7  -1 832.582 47.2179   1
   4   7   1 871.827 46.8742   2
  -4   7  -1 818.848 48.1806   1
  -5   7  -1 60.7163 9.83775   3
  -5   7  -1 62.6139 10.2693   1
   5   7   1 52.8509 9.00699   2
  -5   7  -1 58.4850 10.6153   1
   6  -7   1 341.650 25.2955   1
  -6  -7  -1 334.603 22.5634   4
  -6  -7  -1 345.787 24.0626   3
  -6  -7  -1 354.059 24.7824   2
   6  -7   1 374.639 25.8038   1
  -6   7  -1 403.268 26.0430   1
  -6   7  -1 376.408 25.3267   3
  -6   7  -1 337.738 26.2582   1
  -7  -7  -1 196.572 15.1432   4
   7  -7   1 197.642 18.2883   1
   7  -7   1 200.920 13.1865   4
  -7  -7  -1 163.185 17.1138   2
  -7  -7  -1 201.124 17.4064   3
  -7  -7  -1 189.495 11.0516   1
  -7  -7  -1 192.421 10.8456   1
   7  -7   1 199.166 18.5785   1
  -7   7  -1 180.174 19.4547   3
  -7   7  -1 191.038 19.1564   1
  -7   7  -1 211.355 20.6521   1
  -8  -7  -1 97.9923 14.4601   2
  -8  -7  -1 84.0282 7.73052   1
   8  -7   1 88.4714 13.5727   1
  -8  -7  -1 103.596 7.97393   1
  -8  -7  -1 92.1503 15.8919   3
   8  -7   1 99.7391 15.0313   1
  -8  -7  -1 105.241 11.3656   4
   8  -7   1 96.8013 8.74597   4
  -8   7  -1 96.6770 16.1997   3
  -8   7  -1 82.9072 16.0971   1
  -8   7  -1 135.138 17.4244   1
  -9  -7  -1 103.918 15.6377   2
  -9  -7  -1 86.4920 10.3326   1
   9  -7   1 105.157 16.5768   1
   9  -7   1 75.9709 14.5184   1
  -9  -7  -1 109.705 18.5377   3
   9  -7   1 84.5824 8.35418   4
  -9  -7  -1 106.279 11.4178   4
   9  -7   1 94.0258 8.01939   4
  -9  -7  -1 100.973 10.1368   1
  -9   7  -1 89.7749 15.3932   1
  -9   7  -1 76.7366 15.4770   3
 -10  -7  -1 15.3582 5.76626   4
 -10  -7  -1 23.8379 13.0382   3
 -10  -7  -1 22.5320 6.94039   1
 -10  -7  -1 12.2917 7.90121   1
  10  -7   1 24.5609 13.8471   1
  10  -7   1 10.2043 11.4460   1
 -10  -7  -1 28.8812 15.0537   2
 -10   7  -1 15.5230 12.9370   3
  11  -7   1 86.8123 18.4206   1
 -11  -7  -1 140.758 22.7359   3
 -11  -7  -1 118.917 14.1229   1
 -11  -7  -1 101.045 10.5278   4
 -11   7  -1 91.6716 18.9180   3
 -11   7  -1 78.4854 17.6547   1
 -12  -7  -1 63.9882 18.9254   3
  12  -7   1 21.5706 13.4149   1
 -12   7  -1 -3.3833 16.6339   1
 -12   7  -1 50.0933 18.3049   3
 -13  -7  -1 110.329 27.1163   3
 -13   7  -1 185.279 29.7666   3
 -13   7  -1 165.659 27.0257   1
 -14  -8   1 -4.4996 24.2235   3
 -14   8   1 -6.4877 24.8112   3
 -14   8   1 -3.6611 25.2459   1
 -13  -8   1 106.248 24.7814   3
  13  -8  -1 103.248 19.8863   1
 -13   8   1 104.855 24.9086   3
 -13   8   1 103.067 23.3007   1
 -12  -8   1 11.7791 17.3498   3
 -12  -8   1 12.5101 8.73827   4
  12  -8  -1 19.8335 14.6877   1
 -12   8   1 4.07525 17.0706   3
 -12   8   1 16.6578 16.8951   1
 -11  -8   1 65.6757 20.3489   4
  11  -8  -1 80.2082 18.4266   1
 -11  -8   1 86.6017 14.5016   1
  11  -8  -1 77.3795 11.6167   4
 -11  -8   1 87.7312 12.6934   1
  11  -8  -1 110.125 17.3907   1
 -11   8   1 83.1984 18.4160   3
 -11   8   1 69.6373 16.1162   1
 -10  -8   1 214.398 16.1964   1
 -10  -8   1 199.007 14.6820   1
  10  -8  -1 179.185 25.2513   1
 -10  -8   1 213.945 18.0016   4
  10  -8  -1 259.533 24.4556   1
 -10  -8   1 223.559 23.6671   3
 -10   8   1 220.842 25.3696   3
  -9  -8   1 15.5583 10.7162   3
   9  -8  -1 9.67257 6.15961   4
   9  -8  -1 12.6397 12.1110   1
   9  -8  -1 2.44104 11.1618   1
  -9  -8   1 19.5229 4.87812   1
  -9  -8   1 36.7732 14.2448   2
  -9  -8   1 8.05974 6.90709   4
  -9   8   1 14.7342 11.5876   3
  -9   8   1 20.9071 10.7410   1
  -8  -8   1 27.7185 3.92222   1
  -8  -8   1 2.70002 10.5440   2
   8  -8  -1 17.1363 10.1303   1
  -8  -8   1 16.7252 9.71393   3
   8  -8  -1 29.7293 6.47407   4
  -8  -8   1 20.9207 2.90162   1
   8  -8  -1 19.5504 11.5679   1
  -8  -8   1 22.4827 7.53043   4
  -8   8   1 44.9001 14.1770   1
  -8   8   1 38.4036 11.1236   3
  -8   8   1 31.9171 10.5655   1
  -7  -8   1 584.823 36.2208   3
   7  -8  -1 684.583 39.1905   1
  -7  -8   1 557.135 37.4754   2
   7  -8  -1 573.825 36.7083   1
  -7  -8   1 589.577 34.8463   4
   7  -8  -1 582.391 33.5298   4
  -7   8   1 590.000 37.7051   3
  -7   8   1 582.038 37.6300   1
  -7   8   1 502.367 38.7242   1
  -6  -8   1 95.4757 12.3114   4
   6  -8  -1 138.674 15.6077   1
   6  -8  -1 128.036 15.1491   1
  -6  -8   1 131.880 14.8793   2
  -6   8   1 144.538 14.8135   1
  -6   8   1 130.158 17.0587   1
  -6   8   1 148.981 14.2234   3
  -5  -8   1 60.3343 10.1615   4
  -5  -8   1 64.3943 5.28220   1
  -5  -8   1 76.9677 10.9025   2
   5  -8  -1 63.0392 10.7786   1
  -5  -8   1 72.3095 4.99626   1
   5  -8  -1 84.2986 12.5617   1
  -5   8   1 75.5255 13.0972   1
   5   8  -1 100.221 11.0307   2
  -5   8   1 80.9247 10.9759   3
  -5   8   1 70.8274 10.9483   1
  -4  -8   1 286.224 16.6587   1
  -4  -8   1 282.204 20.8576   2
   4  -8  -1 316.425 22.8492   1
  -4  -8   1 280.039 20.0289   4
  -4  -8   1 282.945 17.0030   1
   4  -8  -1 294.547 21.0312   1
   4   8  -1 307.047 20.7766   2
  -4   8   1 318.785 21.9700   1
  -4   8   1 319.605 21.0031   1
  -4   8   1 321.467 19.7166   3
  -3  -8   1 745.429 40.6119   1
  -3  -8   1 734.135 41.0812   1
  -3  -8   1 785.886 43.7738   2
   3  -8  -1 760.963 43.3610   1
   3  -8  -1 816.726 45.0285   1
  -3   8   1 706.595 43.7807   1
  -3   8   1 776.327 43.4072   1
   3   8  -1 778.836 43.6707   2
  -3   8   1 776.092 41.8111   3
   2  -8  -1 226.949 16.8176   1
  -2  -8   1 253.045 13.8644   3
  -2  -8   1 253.716 14.7841   1
  -2  -8   1 254.392 17.2026   2
   2  -8  -1 278.085 18.3407   1
  -2   8   1 210.532 14.0037   3
   2   8  -1 231.746 13.5550   1
   2   8  -1 225.124 12.7320   1
  -2   8   1 224.698 17.1023   1
   2   8  -1 227.458 16.9356   2
  -2   8   1 224.383 16.1452   1
  -1  -8   1 511.296 29.9676   1
   1  -8  -1 566.191 32.1401   1
  -1  -8   1 445.151 32.2032   2
  -1  -8   1 507.484 28.2442   3
  -1  -8   1 545.773 30.9204   1
   1  -8  -1 494.491 30.4820   1
   1   8  -1 569.114 31.8230   2
  -1   8   1 569.266 31.6238   2
  -1   8   1 563.610 31.2892   1
   1   8  -1 518.003 29.7326   1
  -1   8   1 579.662 30.6731   1
  -1   8   1 530.400 27.8795   3
   0  -8   1 781.478 44.0804   3
   0  -8   1 785.077 45.9645   1
   0  -8  -1 853.364 46.8519   1
   0  -8   1 876.443 47.1460   1
   0  -8  -1 795.117 45.6651   1
   0   8  -1 872.343 46.9563   2
   0   8   1 831.511 45.5856   1
   0   8   1 898.122 45.3525   1
   0   8  -1 801.664 46.1570   1
   0   8  -1 886.967 45.7697   1
   0   8  -1 837.848 44.2424   3
   0   8   1 888.666 47.1534   2
   1  -8   1 19.1866 3.75875   3
   1  -8   1 21.6008 6.30873   1
  -1  -8  -1 13.1818 4.82831   1
  -1  -8  -1 18.9820 6.24050   2
  -1  -8  -1 13.7105 3.74522   1
   1   8   1 16.2628 5.57617   2
   1   8   1 22.9320 3.19377   1
  -1   8  -1 19.2187 3.52883   3
  -1   8  -1 20.1326 5.48858   1
  -1   8  -1 13.0542 4.77953   1
  -1   8  -1 9.07455 5.10736   2
   1   8   1 17.5028 2.83690   1
  -2  -8  -1 700.698 38.3878   1
   2  -8   1 779.296 41.9621   1
  -2  -8  -1 732.017 40.6451   2
  -2  -8  -1 708.739 38.9830   1
   2  -8   1 700.418 40.8070   1
   2  -8   1 707.170 39.4508   3
  -2  -8  -1 721.487 37.6563   3
  -2   8  -1 688.395 41.3681   1
  -2   8  -1 761.152 40.6911   2
   2   8   1 693.977 40.8300   2
  -2   8  -1 710.480 39.1466   3
  -2   8  -1 702.007 40.6423   1
  -3  -8  -1 545.375 31.2693   2
  -3  -8  -1 505.765 28.5862   3
  -3  -8  -1 495.075 27.9135   1
   3  -8   1 481.112 30.3459   3
  -3  -8  -1 513.456 28.3001   1
   3  -8   1 554.935 32.5604   1
   3  -8   1 522.680 31.6829   1
   3   8   1 548.313 31.5809   2
  -3   8  -1 507.603 32.5630   1
  -3   8  -1 556.539 30.4011   3
  -3   8  -1 515.374 31.3539   1
   4  -8   1 166.240 15.5248   1
  -4  -8  -1 176.174 15.0283   2
  -4  -8  -1 185.218 13.2712   3
   4  -8   1 185.923 16.9999   1
  -4  -8  -1 169.741 10.4921   1
  -4  -8  -1 172.759 10.3947   1
   4   8   1 201.094 15.2325   2
  -4   8  -1 223.603 16.1671   1
  -4   8  -1 184.300 16.8357   1
  -4   8  -1 215.245 15.3534   3
  -5  -8  -1 185.351 16.4497   2
   5  -8   1 175.711 17.7640   1
   5  -8   1 206.099 17.8262   1
  -5  -8  -1 193.598 14.9863   3
  -5   8  -1 238.649 17.0003   3
   5   8   1 200.936 16.2545   2
  -5   8  -1 196.013 18.6438   1
  -5   8  -1 237.330 17.8784   1
  -6  -8  -1 594.172 32.6207   3
   6  -8   1 527.316 33.6762   1
  -6  -8  -1 518.336 31.6576   4
   6  -8   1 584.677 34.8409   1
  -6  -8  -1 513.425 32.8456   2
  -6   8  -1 495.830 32.9663   3
  -6   8  -1 430.212 34.2083   1
  -6   8  -1 504.173 33.9031   1
  -7  -8  -1 71.1451 10.9497   4
   7  -8   1 102.774 16.0202   1
   7  -8   1 56.5895 8.38914   4
  -7  -8  -1 75.4047 12.6366   2
  -7  -8  -1 82.2832 13.2977   3
  -7  -8  -1 62.7314 4.61130   1
   7  -8   1 75.8016 12.7448   1
  -7   8  -1 86.0964 13.2458   3
  -7   8  -1 96.2830 15.4792   1
  -7   8  -1 92.4685 16.0552   1
  -8  -8  -1 442.097 24.8802   1
   8  -8   1 446.831 26.6292   4
  -8  -8  -1 511.945 32.7074   3
  -8  -8  -1 461.567 28.8510   4
  -8  -8  -1 444.370 24.7600   1
   8  -8   1 501.428 32.7914   1
   8  -8   1 420.487 33.3519   1
  -8  -8  -1 469.449 32.2769   2
  -8   8  -1 469.783 33.2303   3
  -8   8  -1 479.200 33.4419   1
   9  -8   1 201.444 13.7453   4
  -9  -8  -1 207.029 13.2953   1
  -9  -8  -1 169.873 24.4627   2
   9  -8   1 247.868 22.3330   1
   9  -8   1 178.727 14.6814   4
   9  -8   1 184.580 24.0232   1
  -9  -8  -1 174.477 16.3220   4
  -9  -8  -1 186.321 13.6200   1
  -9  -8  -1 209.664 22.2338   3
  -9   8  -1 229.076 22.1161   1
  -9   8  -1 221.550 22.9662   3
  10  -8   1 284.528 17.1684   4
 -10  -8  -1 245.808 19.7753   1
 -10  -8  -1 310.895 28.3865   3
 -10  -8  -1 308.118 20.3875   4
  10  -8   1 291.085 26.4403   1
  10  -8   1 262.285 29.5526   1
 -10  -8  -1 312.855 20.6300   1
 -10   8  -1 270.037 26.7895   1
 -10   8  -1 278.373 28.2982   3
 -11  -8  -1 116.306 12.9196   4
  11  -8   1 110.904 18.1692   1
  11  -8   1 173.632 29.0922   1
 -11  -8  -1 102.913 20.2716   3
 -11   8  -1 103.213 19.3866   1
 -11   8  -1 115.370 19.9736   3
 -12  -8  -1 62.3894 20.2082   3
  12  -8   1 40.6278 15.3541   1
 -12   8  -1 54.0114 18.3624   1
 -12   8  -1 55.0179 19.1109   3
 -13  -8  -1 30.1118 21.9289   3
 -13   8  -1 30.4647 23.5666   3
 -13   8  -1 34.9808 22.0403   1
  13  -9  -1 -24.776 17.8925   1
 -13  -9   1 9.11758 19.1650   3
 -13   9   1 12.4321 20.5144   1
 -13   9   1 10.6016 20.0684   3
 -12  -9   1 107.122 16.6845   4
 -12  -9   1 82.6831 21.8345   3
 -12   9   1 107.198 23.0098   1
 -12   9   1 176.283 29.8101   3
  11  -9  -1 146.693 24.3883   1
 -11  -9   1 198.842 18.4970   4
 -11   9   1 194.958 28.3701   3
 -11   9   1 169.751 24.6788   1
  10  -9  -1 22.5381 26.2005   1
 -10  -9   1 16.0912 8.69097   4
 -10  -9   1 4.89863 6.30122   1
  10  -9  -1 12.0083 8.03548   4
  10  -9  -1 34.3876 14.4051   1
 -10  -9   1 20.1608 5.08081   1
 -10  -9   1 40.5581 13.4956   3
 -10   9   1 9.11490 12.4288   1
   9  -9  -1 725.460 44.6375   1
  -9  -9   1 677.728 42.7770   3
  -9  -9   1 711.849 39.6866   4
  -9  -9   1 593.919 34.9754   1
   9  -9  -1 636.880 37.7622   4
  -9  -9   1 587.206 34.3678   1
   9  -9  -1 584.694 43.5429   1
  -9   9   1 746.546 45.2313   3
  -9   9   1 673.921 43.6512   1
   8  -9  -1 42.4126 12.1688   1
   8  -9  -1 33.8224 7.58633   4
  -8  -9   1 16.3736 8.21501   4
  -8  -9   1 37.0755 12.4021   2
   8  -9  -1 23.0098 11.6826   1
  -8  -9   1 28.9843 4.43268   1
  -8  -9   1 29.1651 10.0073   3
  -8   9   1 29.9449 11.7385   1
  -8   9   1 17.8737 10.0243   3
  -8   9   1 39.8156 22.1103   1
   7  -9  -1 70.4338 13.3011   1
  -7  -9   1 46.8785 9.31379   4
   7  -9  -1 64.9535 12.1495   1
  -7  -9   1 35.3832 3.79247   1
  -7  -9   1 46.8642 9.36712   3
  -7  -9   1 37.4640 3.87761   1
  -7  -9   1 53.9799 12.3287   2
   7  -9  -1 42.7659 7.57324   4
  -7   9   1 48.6711 14.0637   1
  -7   9   1 66.3038 12.2009   1
  -7   9   1 68.8488 11.2212   3
   6  -9  -1 417.006 29.3135   1
  -6  -9   1 398.328 21.5053   1
  -6  -9   1 414.255 21.3431   1
  -6  -9   1 419.159 26.3508   4
   6  -9  -1 375.022 27.5390   1
  -6  -9   1 434.486 28.7444   2
  -6   9   1 406.747 26.8770   3
  -6   9   1 383.579 27.6476   1
  -6   9   1 340.775 28.7317   1
  -5  -9   1 17.9713 7.86330   2
  -5  -9   1 28.2363 4.13032   1
  -5  -9   1 25.0775 3.85358   1
  -5  -9   1 19.5819 7.17125   4
   5  -9  -1 30.0825 9.92437   1
   5  -9  -1 17.9248 8.51659   1
   5   9  -1 31.8858 7.94646   2
  -5   9   1 38.0673 10.2800   1
  -5   9   1 25.3069 6.98030   3
  -5   9   1 35.0492 8.49827   1
  -4  -9   1 75.4108 6.65596   1
  -4  -9   1 102.687 11.9276   2
  -4  -9   1 64.7446 10.0362   4
  -4  -9   1 80.7177 7.48920   1
   4  -9  -1 64.6000 10.8201   1
   4  -9  -1 70.8510 12.4249   1
   4   9  -1 80.1738 10.9612   2
  -4   9   1 96.3439 11.3725   1
  -4   9   1 86.8323 12.2706   1
  -4   9   1 71.0002 9.38000   3
  -3  -9   1 1356.17 74.7937   2
   3  -9  -1 1496.13 76.5965   1
  -3  -9   1 1374.80 71.8801   1
   3  -9  -1 1374.31 74.6613   1
  -3  -9   1 1209.93 74.2239   1
  -3   9   1 1395.66 74.5243   1
   3   9  -1 1389.02 74.9016   2
  -3   9   1 1338.48 75.2669   1
  -3   9   1 1416.68 72.5564   3
  -2  -9   1 42.9616 7.36150   2
   2  -9  -1 36.8232 8.87961   1
  -2  -9   1 45.2142 7.91545   1
   2  -9  -1 40.5199 7.41364   1
  -2  -9   1 42.1928 6.42792   1
  -2  -9   1 37.2879 4.44670   3
  -2   9   1 50.1103 8.04228   2
   2   9  -1 47.9241 4.02087   1
  -2   9   1 43.0138 7.59729   1
   2   9  -1 44.3953 8.15427   2
  -2   9   1 41.8381 5.13074   3
  -2   9   1 45.6902 9.97681   1
   2   9  -1 40.0911 3.76432   1
   1  -9  -1 2537.89 125.734   1
  -1  -9   1 2288.07 121.317   3
  -1  -9   1 2279.23 123.374   1
  -1  -9   1 2327.82 124.579   2
   1  -9  -1 2221.00 124.348   1
  -1  -9   1 2538.45 124.521   1
  -1   9   1 2212.68 120.827   3
  -1   9   1 2414.05 123.734   1
   1   9  -1 2358.83 123.056   1
   1   9  -1 2407.52 122.582   1
  -1   9   1 2391.48 124.349   1
  -1   9   1 2366.77 124.865   2
   1   9  -1 2503.00 125.306   2
   0  -9   1 214.422 16.6577   1
   0  -9  -1 205.731 14.9825   1
   0  -9   1 209.264 12.8938   3
   0  -9  -1 218.577 16.3749   1
   0   9   1 210.668 14.8238   1
   0   9   1 217.510 14.4489   1
   0   9  -1 233.043 16.6613   2
   0   9  -1 236.383 14.9345   1
   0   9  -1 218.341 15.7473   1
   0   9   1 239.832 16.7537   2
   0   9  -1 210.892 12.9811   3
   1  -9   1 797.592 43.0950   3
   1  -9   1 852.748 46.5382   1
  -1  -9  -1 894.505 45.2489   1
  -1  -9  -1 796.160 43.8072   1
   1  -9   1 797.961 45.1978   1
  -1   9  -1 832.923 45.5601   2
   1   9   1 752.438 42.2139   1
   1   9   1 807.668 45.8688   2
   1   9   1 789.290 42.4743   1
  -1   9  -1 785.458 46.1565   1
  -1   9  -1 820.209 44.7917   1
  -1   9  -1 736.726 42.7188   3
  -2  -9  -1 127.296 9.38053   1
   2  -9   1 121.479 11.9809   1
  -2  -9  -1 115.993 11.4172   2
   2  -9   1 110.277 9.82568   3
  -2  -9  -1 120.750 6.88458   3
   2  -9   1 116.807 13.4225   1
  -2   9  -1 120.031 11.4218   1
  -2   9  -1 107.443 11.2374   2
  -2   9  -1 120.532 12.7417   1
   2   9   1 113.345 11.9934   2
  -2   9  -1 109.811 9.88927   3
   3  -9   1 185.169 17.1319   1
  -3  -9  -1 192.027 12.7341   1
  -3  -9  -1 202.410 12.6959   3
  -3  -9  -1 196.101 16.0248   2
  -3  -9  -1 194.679 13.3996   1
   3  -9   1 183.857 16.4194   1
  -3   9  -1 248.480 16.9627   1
   3   9   1 230.687 16.9062   2
  -3   9  -1 214.822 18.3888   1
  -3   9  -1 204.090 15.7115   2
  -3   9  -1 231.318 15.0198   3
   4  -9   1 483.964 31.2424   1
  -4  -9  -1 489.565 27.6879   3
   4  -9   1 503.867 31.8036   1
  -4  -9  -1 469.599 30.2337   2
  -4  -9  -1 455.854 25.9053   1
  -4  -9  -1 450.364 26.1951   1
  -4   9  -1 481.846 32.0445   1
  -4   9  -1 521.390 31.2789   1
   4   9   1 503.114 30.6089   2
  -5  -9  -1 24.5691 3.48356   1
  -5  -9  -1 27.0043 6.09201   3
  -5  -9  -1 27.6039 3.34087   1
  -5  -9  -1 27.5409 8.31087   2
   5  -9   1 39.9538 10.0802   1
   5  -9   1 32.8966 9.97838   1
  -5   9  -1 24.3942 7.22809   3
   5   9   1 20.7323 7.45778   2
  -5   9  -1 25.2568 10.6806   1
  -5   9  -1 26.1662 8.72927   1
  -6  -9  -1 50.0086 10.4372   2
   6  -9   1 47.2774 11.2938   1
  -6  -9  -1 29.9354 8.10355   4
  -6  -9  -1 33.3840 8.06207   3
   6  -9   1 40.5729 11.0259   1
  -6   9  -1 39.6222 9.19877   3
  -6   9  -1 38.5356 10.0646   1
  -6   9  -1 42.2508 12.3574   1
  -7  -9  -1 400.624 27.3626   4
   7  -9   1 430.404 31.6264   1
  -7  -9  -1 405.150 29.4265   2
   7  -9   1 416.641 31.0367   1
  -7  -9  -1 446.366 28.7632   3
  -7   9  -1 415.873 30.6974   1
  -7   9  -1 426.918 29.9436   3
  -8  -9  -1 176.846 20.4338   2
   8  -9   1 199.155 21.2935   1
  -8  -9  -1 183.900 19.6633   3
  -8  -9  -1 173.407 10.4455   1
   8  -9   1 155.692 23.0785   1
  -8  -9  -1 182.065 17.0251   4
  -8  -9  -1 156.507 10.1973   1
  -8   9  -1 226.485 21.1949   3
  -8   9  -1 231.603 21.1684   1
  -9  -9  -1 211.268 18.7437   4
   9  -9   1 230.514 15.8133   4
  -9  -9  -1 206.841 13.6828   1
   9  -9   1 253.742 24.3381   1
  -9  -9  -1 212.212 13.4413   1
   9  -9   1 193.743 25.8320   1
  -9  -9  -1 261.044 23.4652   3
  -9  -9  -1 174.627 25.7736   2
  -9   9  -1 201.900 23.3356   3
  10  -9   1 309.960 27.8235   1
 -10  -9  -1 280.135 18.8838   1
 -10  -9  -1 283.377 21.7549   4
 -10  -9  -1 276.076 26.2765   3
  10  -9   1 275.349 17.7073   4
 -10  -9  -1 263.211 17.7423   1
 -10   9  -1 274.266 27.5711   1
 -10   9  -1 301.803 29.0422   3
 -11  -9  -1 53.8001 9.90142   4
 -11  -9  -1 51.0359 17.3216   3
 -11   9  -1 47.5747 16.7712   1
 -11   9  -1 72.6217 19.3843   3
  12  -9   1 69.0384 18.9422   1
 -12  -9  -1 76.7676 21.8969   3
 -12   9  -1 97.2447 21.9283   1
 -12   9  -1 89.4414 22.1418   3
 -13  -9  -1 -11.447 23.2434   3
 -13   9  -1 -26.538 21.9059   1
 -13   9  -1 0.35668 24.1630   3
  13 -10  -1 121.431 23.7072   1
 -13 -10   1 191.020 28.6934   3
 -13  10   1 163.058 27.9670   3
 -13  10   1 168.646 28.6294   1
 -12 -10   1 33.3202 18.0824   3
 -12 -10   1 33.8062 11.8880   4
  12 -10  -1 66.1620 19.3038   1
 -12  10   1 40.4951 18.6917   3
 -12  10   1 39.8795 19.1174   1
 -11 -10   1 110.672 17.4828   4
  11 -10  -1 87.1240 19.4913   1
 -11  10   1 105.000 21.4035   1
 -11  10   1 141.718 23.9283   3
 -10 -10   1 283.302 18.9599   1
  10 -10  -1 325.349 34.8402   1
 -10 -10   1 323.089 24.4471   4
 -10 -10   1 300.323 28.5214   3
  10 -10  -1 315.934 22.6950   4
 -10 -10   1 267.252 17.3915   1
 -10  10   1 352.961 30.9406   1
 -10  10   1 276.038 32.7521   3
  -9 -10   1 26.4934 4.32171   1
   9 -10  -1 19.9499 8.47441   4
  -9 -10   1 22.2729 12.2047   3
  -9 -10   1 34.9053 9.70599   4
   9 -10  -1 22.5867 14.9128   1
  -9 -10   1 24.7582 3.47619   1
  -9  10   1 11.3477 11.5672   3
  -8 -10   1 202.187 11.2570   1
  -8 -10   1 183.670 11.4884   1
   8 -10  -1 187.413 22.7099   1
   8 -10  -1 197.279 24.3485   1
  -8 -10   1 204.717 20.2508   3
  -8 -10   1 170.246 23.1300   2
  -8 -10   1 208.311 17.8854   4
   8 -10  -1 214.992 17.1677   4
  -8  10   1 233.325 21.9383   1
  -8  10   1 200.260 21.8812   3
  -7 -10   1 291.728 21.8464   3
   7 -10  -1 299.094 25.2640   1
  -7 -10   1 282.071 22.0808   4
   7 -10  -1 269.589 25.1625   1
  -7 -10   1 275.052 15.6141   1
  -7 -10   1 274.793 15.4627   1
   7 -10  -1 258.236 19.8598   4
  -7 -10   1 311.855 25.0400   2
  -7  10   1 256.736 22.2485   3
  -7  10   1 282.814 23.7089   1
  -6 -10   1 95.7529 15.9806   2
  -6 -10   1 99.0495 13.0284   4
  -6 -10   1 110.324 8.21598   1
  -6 -10   1 103.858 12.9465   3
  -6 -10   1 116.993 7.79394   1
   6 -10  -1 94.1974 15.2877   1
   6 -10  -1 129.034 17.1475   1
  -6  10   1 111.367 17.7008   1
  -6  10   1 90.6721 14.2896   1
   6  10  -1 102.802 14.1677   2
  -6  10   1 109.511 13.3359   3
  -5 -10   1 23.2035 4.59352   1
   5 -10  -1 11.9302 9.06691   1
  -5 -10   1 26.1470 9.42268   2
   5 -10  -1 14.6068 10.1643   1
  -5 -10   1 28.9909 4.19823   1
  -5 -10   1 16.2364 7.56632   4
  -5  10   1 22.5338 8.24088   1
   5  10  -1 23.4766 8.44960   2
  -5  10   1 23.1842 7.29878   3
  -5  10   1 22.5626 10.2994   1
   4 -10  -1 202.290 16.7730   1
  -4 -10   1 171.389 13.5610   1
   4 -10  -1 194.595 18.4981   1
  -4 -10   1 199.480 12.2492   1
  -4 -10   1 202.105 17.2581   2
  -4 -10   1 194.699 16.4182   4
  -4  10   1 161.797 15.9074   1
  -4  10   1 152.959 17.7365   1
  -4  10   1 168.507 13.7530   3
   4  10  -1 158.426 16.0003   2
  -3 -10   1 926.139 49.4298   1
  -3 -10   1 853.534 51.3250   2
  -3 -10   1 871.302 47.6001   3
   3 -10  -1 833.968 51.0879   1
   3 -10  -1 951.605 53.1299   1
  -3 -10   1 857.206 48.3659   1
   3  10  -1 953.934 51.8583   2
  -3  10   1 874.275 52.0387   1
  -3  10   1 931.413 48.6518   3
  -3  10   1 945.468 51.3877   1
   2 -10  -1 1060.00 56.9321   1
   2 -10  -1 969.392 54.8943   1
  -2 -10   1 960.424 51.0215   3
  -2 -10   1 1009.35 55.4613   2
  -2 -10   1 1082.15 54.3617   1
  -2 -10   1 968.479 53.0721   1
  -2  10   1 927.729 55.0497   1
   2  10  -1 972.368 55.4687   2
  -2  10   1 999.446 54.5176   1
  -2  10   1 1052.30 55.6576   2
   2  10  -1 921.703 50.7495   1
  -2  10   1 913.088 51.4160   3
   2  10  -1 946.745 50.9260   1
   1 -10  -1 75.9860 10.5833   1
   1 -10  -1 93.7190 12.3535   1
  -1 -10   1 78.0079 6.08924   3
  -1 -10   1 95.4463 10.8722   1
  -1 -10   1 76.2381 10.4363   2
  -1  10   1 107.240 10.2080   1
  -1  10   1 91.1230 10.2152   2
   1  10  -1 98.6353 10.4361   2
  -1  10   1 88.5382 10.5410   1
   1  10  -1 99.1082 8.61073   1
   1  10  -1 79.5733 9.07988   1
   0 -10  -1 442.878 28.4065   1
   0 -10   1 427.862 28.1667   1
   0 -10   1 403.612 26.9765   1
   0 -10  -1 395.692 27.1468   1
   0 -10   1 411.476 24.4130   3
   0  10   1 484.708 26.8622   1
   0  10   1 487.193 26.2669   1
   0  10  -1 439.122 27.4297   1
   0  10  -1 457.467 24.6025   3
   0  10   1 470.625 28.7319   2
   0  10  -1 492.682 28.7995   2
   0  10  -1 483.091 26.8011   1
   1 -10   1 80.7026 10.8667   1
   1 -10   1 85.1761 12.0631   1
  -1 -10  -1 71.6050 8.59330   1
   1 -10   1 64.1249 7.10749   3
  -1 -10  -1 59.1147 9.81087   1
   1  10   1 77.4001 6.82806   1
   1  10   1 73.6720 6.42843   1
   1  10   1 81.8271 10.8352   2
  -1  10  -1 80.2640 9.64991   1
  -1  10  -1 65.4140 10.1309   2
  -1  10  -1 77.1704 10.8711   1
  -1  10  -1 75.7140 6.92345   3
  -2 -10  -1 859.572 45.3505   1
  -2 -10  -1 777.921 43.9803   1
  -2 -10  -1 795.662 46.1705   2
   2 -10   1 847.265 47.8969   1
   2 -10   1 761.117 46.5758   1
   2 -10   1 757.784 44.1554   3
  -2  10  -1 857.119 46.4548   1
   2  10   1 837.020 47.0070   2
  -2  10  -1 747.805 46.9019   1
  -2  10  -1 838.039 46.4610   2
  -2  10  -1 822.122 44.1072   3
   3 -10   1 207.644 19.2310   1
  -3 -10  -1 230.482 13.6977   3
  -3 -10  -1 232.521 14.8248   1
  -3 -10  -1 240.843 18.3495   2
   3 -10   1 238.338 20.2874   1
  -3  10  -1 227.378 17.6763   2
  -3  10  -1 236.997 18.7131   1
  -3  10  -1 245.285 16.3063   3
   3  10   1 240.231 18.8464   2
  -3  10  -1 238.575 20.5207   1
  -4 -10  -1 171.105 12.5530   3
  -4 -10  -1 174.745 11.4443   1
  -4 -10  -1 163.887 12.0530   1
   4 -10   1 153.585 17.0694   1
   4 -10   1 161.451 17.7651   1
  -4 -10  -1 163.917 16.0052   2
   4  10   1 182.434 16.4283   2
  -4  10  -1 171.459 17.9722   1
  -4  10  -1 182.644 14.4110   3
  -4  10  -1 209.416 16.0751   2
  -4  10  -1 200.479 16.7648   1
  -5 -10  -1 22.3623 3.97857   1
  -5 -10  -1 28.4341 8.78743   2
  -5 -10  -1 30.4929 6.04783   3
   5 -10   1 36.4524 10.4941   1
  -5 -10  -1 23.2364 3.65652   1
   5 -10   1 36.9638 10.8281   1
   5  10   1 35.7285 9.43001   2
  -5  10  -1 32.9039 8.37730   3
  -5  10  -1 29.0461 11.1153   1
  -5  10  -1 34.8961 9.81529   1
  -6 -10  -1 30.4279 3.96030   1
  -6 -10  -1 17.5677 7.14861   3
  -6 -10  -1 37.3963 8.93200   4
  -6 -10  -1 31.7149 11.2530   2
   6 -10   1 25.6367 11.0284   1
  -6 -10  -1 26.7096 4.02359   1
   6 -10   1 41.2133 11.8589   1
  -6  10  -1 22.7420 9.60108   3
   6  10   1 13.6919 8.73314   2
  -6  10  -1 21.6894 9.64857   1
   7 -10   1 339.578 27.6988   1
  -7 -10  -1 302.085 23.2991   4
  -7 -10  -1 293.058 16.8026   1
  -7 -10  -1 333.325 23.4670   3
  -7 -10  -1 277.219 25.1587   2
   7 -10   1 309.379 28.2162   1
  -7  10  -1 330.848 25.9826   1
  -7  10  -1 339.483 25.4137   3
  -8 -10  -1 34.2086 13.8370   2
  -8 -10  -1 32.4381 9.84450   4
   8 -10   1 25.3363 7.59105   4
  -8 -10  -1 32.6728 10.9933   3
   8 -10   1 24.3587 12.1946   1
  -8  10  -1 24.7167 12.1608   1
  -8  10  -1 13.8475 12.0035   3
  -9 -10  -1 27.8450 9.75121   4
  -9 -10  -1 39.1916 5.48758   1
  -9 -10  -1 38.4430 5.71336   1
   9 -10   1 34.3614 9.08041   4
   9 -10   1 31.2823 14.4676   1
  -9 -10  -1 35.3594 12.7144   3
  -9  10  -1 20.9682 16.1336   3
  -9  10  -1 26.3042 13.2732   1
  10 -10   1 214.946 17.1709   4
 -10 -10  -1 189.842 13.5685   1
 -10 -10  -1 174.771 19.4007   4
  10 -10   1 170.093 25.9909   1
 -10 -10  -1 253.721 25.4073   3
 -10  10  -1 243.853 26.0554   1
 -10  10  -1 212.435 26.5030   3
 -11 -10  -1 75.5943 12.2694   4
  11 -10   1 61.4755 18.1207   1
 -11 -10  -1 91.2553 19.0330   3
 -11  10  -1 53.1289 18.9056   1
 -11  10  -1 72.0497 20.4206   3
  12 -10   1 14.9262 17.8949   1
 -12 -10  -1 4.91455 19.3822   3
 -12  10  -1 40.0417 20.6430   3
 -12  10  -1 22.0232 21.8198   1
 -13 -11   1 12.7745 23.7834   3
  13 -11  -1 4.83090 21.7504   1
 -13  11   1 36.6696 23.0190   3
 -13  11   1 20.4609 24.1016   1
 -12 -11   1 16.8170 18.1114   3
  12 -11  -1 6.54986 19.2045   1
 -12 -11   1 17.6225 12.2262   4
 -12  11   1 27.8650 18.5328   3
 -12  11   1 35.5832 20.2980   1
 -11 -11   1 165.700 20.3434   4
  11 -11  -1 160.453 27.4706   1
 -11  11   1 139.647 23.8409   1
 -11  11   1 127.985 21.8273   3
  10 -11  -1 64.2924 17.4327   1
 -10 -11   1 69.9900 13.2236   4
 -10 -11   1 60.8743 8.74701   1
  10 -11  -1 55.2659 11.5321   4
 -10 -11   1 87.5855 15.9250   3
 -10 -11   1 65.2533 7.03815   1
 -10  11   1 75.7479 17.5930   1
 -10  11   1 82.1176 17.2203   3
   9 -11  -1 206.432 20.2185   4
  -9 -11   1 218.173 13.5525   1
  -9 -11   1 245.155 22.2204   4
  -9 -11   1 221.564 23.4932   3
  -9  11   1 285.188 26.3410   3
  -9  11   1 268.380 25.5024   1
   8 -11  -1 33.9776 15.9652   1
   8 -11  -1 34.1510 9.13196   4
  -8 -11   1 44.6125 11.5618   3
  -8 -11   1 41.9105 5.14052   1
  -8 -11   1 29.0727 10.5027   4
  -8 -11   1 40.3839 5.45432   1
  -8  11   1 33.2712 13.4361   1
  -8  11   1 57.9940 12.3849   3
   7 -11  -1 358.216 29.8712   1
  -7 -11   1 362.133 28.5708   2
  -7 -11   1 354.809 26.2354   4
  -7 -11   1 329.107 19.1509   1
   7 -11  -1 307.572 27.9421   1
  -7 -11   1 337.051 24.5392   3
  -7 -11   1 328.512 18.8709   1
  -7  11   1 340.274 27.9039   1
  -7  11   1 313.761 25.0050   3
   6 -11  -1 103.344 17.0006   1
   6 -11  -1 99.4479 16.3971   1
  -6 -11   1 133.920 13.8472   3
  -6 -11   1 99.3706 15.4165   4
  -6 -11   1 126.926 10.0566   1
  -6 -11   1 159.252 18.3347   2
  -6 -11   1 116.636 12.0441   1
  -6  11   1 143.429 17.9415   1
  -6  11   1 122.007 18.0519   1
   6  11  -1 119.908 15.6258   2
  -6  11   1 125.160 14.7099   3
   5 -11  -1 614.671 39.0137   1
  -5 -11   1 503.047 32.2123   1
  -5 -11   1 577.129 30.8554   1
   5 -11  -1 518.887 35.9820   1
  -5 -11   1 603.693 36.0951   4
  -5 -11   1 548.743 36.4242   2
  -5  11   1 569.602 36.0761   1
   5  11  -1 557.735 35.7093   2
  -5  11   1 591.355 33.8842   3
  -5  11   1 489.490 36.8480   1
  -4 -11   1 98.8074 9.48131   1
  -4 -11   1 89.3383 14.1675   2
   4 -11  -1 119.475 15.3118   1
  -4 -11   1 99.3676 13.6137   4
   4 -11  -1 101.132 15.9840   1
  -4 -11   1 116.101 11.1602   1
  -4  11   1 100.291 13.4841   1
  -4  11   1 112.870 16.2633   1
   4  11  -1 113.165 14.1141   2
  -4  11   1 133.913 11.4513   3
  -3 -11   1 202.136 14.3441   1
   3 -11  -1 224.410 19.5949   1
  -3 -11   1 207.766 12.3339   3
  -3 -11   1 217.036 15.6192   1
   3 -11  -1 195.313 17.9989   1
  -3 -11   1 190.254 17.6974   2
  -3  11   1 179.355 13.6523   3
   3  11  -1 196.952 17.6195   2
  -3  11   1 157.255 16.8070   1
  -3  11   1 211.024 17.4318   2
  -2 -11   1 799.867 43.3988   1
  -2 -11   1 718.157 39.1803   3
   2 -11  -1 737.650 43.9885   1
  -2 -11   1 708.503 44.0158   2
   2 -11  -1 795.781 46.1333   1
  -2  11   1 773.493 43.4313   1
   2  11  -1 801.911 45.0081   2
   2  11  -1 758.258 39.4974   1
  -2  11   1 721.481 44.0828   1
   2  11  -1 715.979 39.2671   1
  -2  11   1 718.855 39.7797   3
  -2  11   1 789.614 44.6281   2
   1 -11  -1 1068.01 62.0230   1
  -1 -11   1 1047.45 58.0784   3
  -1 -11   1 1051.56 61.3641   1
   1 -11  -1 1224.46 64.3301   1
  -1 -11   1 1058.98 62.4745   2
  -1 -11   1 1144.27 62.5740   1
   1  11  -1 1163.52 60.0499   1
   1  11  -1 1147.41 60.7079   1
  -1  11   1 1190.94 63.5395   2
  -1  11   1 1159.87 61.4992   1
   1  11  -1 1148.70 63.3192   2
   0 -11   1 68.9597 11.9268   1
   0 -11   1 91.0419 11.0205   1
   0 -11   1 65.9855 5.93346   3
   0 -11  -1 61.6431 10.3038   1
   0 -11  -1 59.5645 9.02078   1
   0  11   1 80.9658 8.42270   1
   0  11  -1 61.2119 9.06878   1
   0  11  -1 54.5530 8.72865   1
   0  11  -1 58.0739 10.0618   2
   0  11   1 51.6389 9.83264   2
   1 -11   1 483.483 30.7798   1
   1 -11   1 433.845 26.2779   3
  -1 -11  -1 420.761 28.2149   1
  -1 -11  -1 480.388 29.9526   1
   1 -11   1 457.999 29.9540   1
  -1  11  -1 496.805 29.1162   1
   1  11   1 489.336 26.2389   1
  -1  11  -1 511.925 30.3880   2
   1  11   1 422.462 26.5584   1
  -1  11  -1 454.161 26.2774   3
   1  11   1 519.155 30.9096   2
  -1  11  -1 488.420 30.1768   1
  -2 -11  -1 223.120 16.1719   1
  -2 -11  -1 245.549 17.7052   1
  -2 -11  -1 220.844 18.3247   2
   2 -11   1 207.324 19.0602   1
   2 -11   1 240.207 19.8640   1
  -2  11  -1 240.216 19.8588   1
  -2  11  -1 234.049 18.4558   1
  -2  11  -1 249.307 18.7830   2
  -2  11  -1 241.193 15.6735   3
   2  11   1 240.111 19.2089   2
  -3 -11  -1 449.829 30.0931   2
   3 -11   1 495.293 32.5397   1
  -3 -11  -1 453.708 24.8798   3
  -3 -11  -1 484.435 28.4203   1
   3 -11   1 435.028 30.6774   1
  -3 -11  -1 444.172 26.9444   1
  -3  11  -1 434.414 31.7852   1
   3  11   1 470.648 30.9542   2
  -3  11  -1 498.169 28.0594   3
  -3  11  -1 488.242 30.2071   2
  -3  11  -1 487.160 30.4002   1
  -4 -11  -1 361.263 27.1354   2
   4 -11   1 420.550 28.5854   1
   4 -11   1 403.428 29.5468   1
  -4 -11  -1 366.537 22.7894   1
  -4  11  -1 429.193 25.8171   3
  -4  11  -1 428.321 27.2053   2
  -4  11  -1 370.130 30.0907   1
   4  11   1 392.992 27.6860   2
  -4  11  -1 398.644 27.5260   1
  -5 -11  -1 10.2360 3.95319   1
   5 -11   1 -0.0301 9.83014   1
   5 -11   1 4.09767 10.2528   1
  -5 -11  -1 0.80564 4.28295   1
  -5 -11  -1 7.21956 5.27351   3
  -5 -11  -1 4.64188 8.64994   2
  -5  11  -1 18.3402 8.97008   1
  -5  11  -1 20.6436 7.80473   3
   5  11   1 9.46290 8.43224   2
  -5  11  -1 12.9725 7.98071   2
  -5  11  -1 11.8923 11.1533   1
  -6 -11  -1 206.712 16.0828   3
   6 -11   1 194.925 22.8855   1
  -6 -11  -1 174.572 17.5964   4
  -6 -11  -1 181.777 12.1848   1
   6 -11   1 202.121 21.0605   1
  -6 -11  -1 200.516 21.2280   2
  -6 -11  -1 176.150 11.6477   1
   6  11   1 181.330 18.6274   2
  -6  11  -1 185.068 19.3968   1
  -6  11  -1 185.205 18.4617   3
  -7 -11  -1 15.9264 9.09989   4
  -7 -11  -1 25.9489 8.93371   3
   7 -11   1 12.1097 11.8979   1
  -7 -11  -1 18.5381 3.50619   1
  -7 -11  -1 27.0977 12.3170   2
  -7 -11  -1 18.8686 3.36693   1
  -7  11  -1 24.1372 11.2389   3
  -7  11  -1 28.0396 11.3814   1
   8 -11   1 15.0515 8.26312   4
   8 -11   1 31.5463 14.5223   1
  -8 -11  -1 21.0283 3.20966   1
  -8 -11  -1 35.1805 10.9349   3
  -8 -11  -1 29.2151 10.6101   4
  -8  11  -1 3.90203 12.0426   1
  -8  11  -1 10.0311 11.6821   3
  -9 -11  -1 99.3886 16.8538   4
   9 -11   1 95.4946 17.9450   1
   9 -11   1 89.4449 14.5325   4
  -9 -11  -1 131.530 19.4133   3
  -9  11  -1 105.109 18.4715   1
  10 -11   1 134.643 16.4488   4
 -10 -11  -1 171.121 23.3883   3
 -10 -11  -1 126.461 19.2164   4
  10 -11   1 132.805 20.8062   1
 -10  11  -1 134.904 23.4919   1
 -10  11  -1 106.531 19.9720   3
 -11 -11  -1 48.2069 18.0812   3
  11 -11   1 22.8280 21.2773   1
 -11 -11  -1 45.9175 12.4381   4
 -11  11  -1 50.2121 17.7789   3
 -11  11  -1 33.2342 19.5037   1
  12 -11   1 32.9002 19.9868   1
 -12 -11  -1 -13.058 20.1566   3
 -12  11  -1 33.1985 21.4246   3
  12 -12  -1 42.5485 20.8369   1
 -12 -12   1 54.0918 16.9389   4
 -12  12   1 62.4304 21.8825   1
 -12  12   1 23.3102 19.2869   3
  11 -12  -1 81.0390 20.6162   1
 -11  12   1 40.4753 18.7768   3
 -11  12   1 59.0267 19.4269   1
 -10 -12   1 233.982 23.2247   4
  10 -12  -1 248.715 28.5069   1
 -10 -12   1 202.391 26.6207   3
 -10  12   1 229.246 27.3353   1
 -10  12   1 242.642 28.4226   3
  -9 -12   1 219.763 13.1474   1
  -9 -12   1 255.142 24.0683   3
   9 -12  -1 197.855 26.2118   1
   9 -12  -1 204.700 21.0738   4
  -9 -12   1 209.779 12.6903   1
  -9  12   1 248.020 27.4255   1
  -9  12   1 199.486 23.4450   3
  -8 -12   1 225.738 13.8333   1
  -8 -12   1 218.245 13.8115   1
  -8 -12   1 257.508 22.2820   3
  -8 -12   1 220.616 20.7800   4
   8 -12  -1 219.954 20.4046   4
  -8  12   1 193.048 24.3051   1
  -8  12   1 228.263 22.3750   3
  -7 -12   1 212.195 19.2631   3
  -7 -12   1 208.674 14.0659   1
   7 -12  -1 235.088 24.4768   1
  -7 -12   1 208.275 20.3706   4
  -7 -12   1 191.708 13.4581   1
  -7  12   1 205.209 19.7148   3
  -7  12   1 216.455 22.0991   1
   6 -12  -1 423.242 31.8707   1
  -6 -12   1 386.609 22.9216   1
  -6 -12   1 335.972 30.1722   2
  -6 -12   1 391.862 28.2865   4
  -6 -12   1 412.918 25.8861   3
  -6 -12   1 346.936 24.7450   1
   6 -12  -1 383.374 30.9556   1
  -6  12   1 433.661 30.0321   1
  -6  12   1 429.915 32.1198   3
   6  12  -1 447.882 29.4916   2
  -6  12   1 348.224 33.0689   1
   5 -12  -1 155.478 19.4750   1
  -5 -12   1 145.812 13.0030   1
  -5 -12   1 156.935 16.7611   4
  -5 -12   1 115.559 11.3455   1
  -5 -12   1 131.866 12.2337   3
  -5 -12   1 133.291 18.2037   2
  -5  12   1 154.269 21.2233   1
  -5  12   1 148.446 17.6937   1
   5  12  -1 144.882 16.7816   2
  -5  12   1 144.732 14.6106   3
  -4 -12   1 673.978 43.4572   2
   4 -12  -1 775.991 46.3658   1
   4 -12  -1 637.768 43.3333   1
  -4 -12   1 713.812 38.2721   3
  -4 -12   1 732.295 43.4217   4
  -4 -12   1 771.765 40.4920   1
  -4 -12   1 713.053 39.2867   1
   4  12  -1 683.011 43.1929   2
  -4  12   1 607.032 43.5012   1
  -4  12   1 705.039 39.7784   3
  -4  12   1 719.393 43.2905   2
  -4  12   1 682.023 42.9217   1
  -3 -12   1 635.536 42.6050   1
   3 -12  -1 755.664 46.2529   1
  -3 -12   1 778.608 42.5919   1
  -3 -12   1 730.061 44.5164   2
  -3 -12   1 703.344 38.6669   3
   3 -12  -1 690.885 43.8759   1
  -3  12   1 773.045 44.7198   2
  -3  12   1 775.472 40.3264   3
   3  12  -1 756.389 44.7811   2
  -3  12   1 773.529 44.1778   1
  -3  12   1 706.864 44.8945   1
  -2 -12   1 111.658 13.1422   1
   2 -12  -1 102.231 13.3690   1
  -2 -12   1 112.244 6.64635   3
  -2 -12   1 111.517 11.8095   1
  -2 -12   1 102.565 14.0997   2
   2 -12  -1 138.201 17.1097   1
   2  12  -1 105.095 7.57015   1
  -2  12   1 106.519 14.6207   1
  -2  12   1 95.4016 7.61044   3
  -2  12   1 102.824 13.7579   2
   2  12  -1 112.026 7.44414   1
   2  12  -1 107.711 14.1246   2
  -2  12   1 120.015 12.9898   1
  -1 -12   1 118.633 13.3183   1
  -1 -12   1 129.662 7.92311   3
  -1 -12   1 132.225 14.6975   1
   1 -12  -1 137.214 15.6449   1
   1 -12  -1 129.248 14.3413   1
  -1 -12   1 144.074 14.9422   2
   1  12  -1 155.446 15.2885   2
  -1  12   1 135.225 12.9886   1
  -1  12   1 131.100 14.7953   2
   1  12  -1 132.220 10.9875   1
  -1  12   1 145.545 14.3405   1
   1  12  -1 132.680 12.1132   1
   0 -12   1 80.9188 11.6086   1
   0 -12   1 83.2807 12.8162   1
   0 -12  -1 99.0584 14.3601   1
   0 -12  -1 65.6150 11.7155   1
   0  12   1 105.207 13.5120   2
   0  12   1 104.045 11.0844   1
   0  12  -1 99.3864 11.2436   1
   0  12   1 123.162 10.3955   1
   0  12  -1 118.890 13.6467   2
   1 -12   1 29.9609 10.0262   1
  -1 -12  -1 29.5816 7.21667   1
  -1 -12  -1 23.5182 8.35186   1
   1 -12   1 43.1441 9.59942   1
  -1  12  -1 27.4560 8.51847   2
   1  12   1 31.9962 5.01480   1
   1  12   1 34.6627 9.26500   2
  -1  12  -1 30.1452 4.69517   3
  -1  12  -1 31.4268 8.66096   1
  -1  12  -1 26.3491 7.64158   1
   2 -12   1 590.067 41.1529   1
   2 -12   1 670.993 42.6783   1
  -2 -12  -1 652.537 41.2504   2
  -2 -12  -1 596.600 38.7734   1
  -2 -12  -1 693.781 40.6323   1
   2  12   1 714.222 42.3681   2
  -2  12  -1 658.410 42.2029   1
  -2  12  -1 775.297 38.4435   3
  -2  12  -1 751.399 42.2167   2
  -2  12  -1 762.716 41.2865   1
  -3 -12  -1 340.545 21.8969   1
   3 -12   1 294.773 24.3640   1
  -3 -12  -1 298.190 20.2735   1
  -3 -12  -1 292.076 23.6767   2
   3 -12   1 288.828 24.8328   1
  -3  12  -1 337.469 23.8512   2
  -3  12  -1 303.942 25.9260   1
   3  12   1 307.777 24.6968   2
  -3  12  -1 340.918 20.8789   3
  -3  12  -1 328.169 24.1880   1
   4 -12   1 26.8767 12.7313   1
  -4 -12  -1 24.5854 6.04516   1
   4 -12   1 38.9995 11.9909   1
  -4 -12  -1 20.7217 4.29657   3
  -4 -12  -1 30.3348 10.3778   2
  -4 -12  -1 43.8956 7.78213   1
   4  12   1 21.3246 9.70033   2
  -4  12  -1 27.3501 10.2978   1
  -4  12  -1 7.94984 8.12302   2
  -4  12  -1 31.5646 12.3845   1
  -4  12  -1 20.6381 7.23458   3
  -5 -12  -1 -2.4001 4.50149   1
  -5 -12  -1 11.1935 10.2553   2
  -5 -12  -1 0.11797 5.14119   3
   5 -12   1 3.60344 11.1082   1
  -5  12  -1 -9.2313 7.44559   2
  -5  12  -1 -9.0588 6.33055   3
  -5  12  -1 -15.640 12.2072   1
  -5  12  -1 5.65482 9.83932   1
  -6 -12  -1 9.38856 9.56726   4
  -6 -12  -1 17.8690 4.93192   1
   6 -12   1 22.2318 12.6611   1
  -6 -12  -1 47.9517 13.9423   2
  -6 -12  -1 26.2635 7.51758   3
  -6 -12  -1 28.1026 5.75924   1
  -6  12  -1 25.4409 9.76400   2
  -6  12  -1 31.5033 11.4017   1
   6  12   1 16.8166 10.3484   2
  -6  12  -1 9.12889 8.77031   3
  -7 -12  -1 153.939 19.6553   4
  -7 -12  -1 176.109 11.4368   1
  -7 -12  -1 164.311 17.1840   3
   7 -12   1 179.202 22.0824   1
  -7 -12  -1 163.092 12.0790   1
  -7  12  -1 200.773 19.6697   3
   8 -12   1 46.5254 15.7782   1
  -8 -12  -1 52.2789 5.78102   1
  -8 -12  -1 52.1046 6.62058   1
  -8 -12  -1 36.8627 12.2295   4
  -8 -12  -1 56.0153 11.9958   3
  -8  12  -1 57.4228 14.3022   3
  -8  12  -1 51.7349 14.5871   1
   9 -12   1 25.5962 16.5045   1
  -9 -12  -1 55.3643 12.6622   4
  -9 -12  -1 23.0748 12.9923   3
   9 -12   1 26.3340 10.4113   4
  -9  12  -1 14.4415 14.5754   3
  -9  12  -1 39.6514 15.6730   1
 -10 -12  -1 4.61430 11.8392   4
  10 -12   1 42.6321 17.4293   1
  10 -12   1 22.6993 11.1536   4
 -10 -12  -1 -9.2580 13.7926   3
 -10  12  -1 5.21852 15.7182   3
 -10  12  -1 35.5186 17.0611   1
 -11 -12  -1 3.60565 14.9130   4
 -11 -12  -1 3.67597 18.5161   3
  11 -12   1 19.8294 18.2591   1
 -11  12  -1 50.6203 21.0175   1
 -11  12  -1 -9.1595 17.2353   3
  12 -12   1 80.2769 22.8957   1
 -12 -12  -1 12.2079 22.5175   3
 -12  12  -1 20.3408 23.5539   1
 -12  12  -1 40.3176 23.7374   3
 -12 -13   1 13.9058 24.4402   3
  12 -13  -1 27.1842 23.4861   1
 -12  13   1 20.5152 21.7159   3
 -12  13   1 9.32732 22.0464   1
 -11 -13   1 33.7654 15.7473   4
  11 -13  -1 70.1375 22.1180   1
 -11  13   1 58.3911 18.7646   3
 -11  13   1 57.7799 19.9628   1
 -10 -13   1 13.5262 13.5321   4
 -10 -13   1 55.6793 17.2270   3
  10 -13  -1 36.3362 18.5657   1
 -10  13   1 35.7866 17.3766   1
 -10  13   1 44.3876 16.5794   3
  -9 -13   1 68.5825 14.1475   4
   9 -13  -1 72.6984 18.6965   1
   9 -13  -1 72.9128 14.3217   4
  -9 -13   1 46.0904 9.55164   1
  -9 -13   1 93.4742 15.3113   3
  -9 -13   1 54.6007 7.06298   1
  -9  13   1 60.9075 16.4225   1
  -9  13   1 100.068 16.5752   3
   8 -13  -1 158.503 25.9523   1
  -8 -13   1 116.100 10.6652   1
   8 -13  -1 104.978 15.0032   4
  -8 -13   1 126.393 10.7719   1
  -8 -13   1 114.541 18.3554   3
  -8 -13   1 138.239 20.2015   4
  -8  13   1 135.364 22.4026   1
  -8  13   1 152.381 18.8870   3
  -7 -13   1 662.304 42.0707   4
  -7 -13   1 579.015 34.6192   1
  -7 -13   1 624.187 38.3885   3
   7 -13  -1 649.449 57.7628   1
  -7  13   1 648.279 40.4396   3
  -6 -13   1 127.024 11.5045   1
   6 -13  -1 133.713 22.3442   1
  -6 -13   1 122.016 18.3161   4
  -6 -13   1 99.5976 13.0730   3
  -6 -13   1 128.528 13.0155   1
  -6  13   1 148.151 18.6273   1
  -6  13   1 106.952 15.2460   3
   6  13  -1 146.617 18.8739   2
  -5 -13   1 717.964 39.3534   1
  -5 -13   1 700.227 43.1537   4
  -5 -13   1 682.613 38.2975   3
  -5 -13   1 649.735 37.8127   3
   5 -13  -1 752.342 46.2009   1
  -5 -13   1 678.822 38.5802   1
  -5 -13   1 602.901 43.5898   2
  -5  13   1 714.544 43.9200   1
   5  13  -1 647.271 42.9786   2
  -5  13   1 608.439 44.7284   1
  -5  13   1 680.515 40.0710   3
  -5  13   1 707.574 43.2120   2
  -4 -13   1 139.929 12.7983   1
  -4 -13   1 113.355 9.88908   3
   4 -13  -1 134.947 17.9355   1
  -4 -13   1 124.976 9.71500   3
   4 -13  -1 129.074 19.3625   1
  -4 -13   1 136.714 16.9080   4
  -4 -13   1 107.045 17.4803   2
  -4  13   1 126.339 11.9621   3
   4  13  -1 132.790 16.6617   2
  -4  13   1 137.168 20.1442   1
  -4  13   1 97.0696 15.9517   2
  -4  13   1 102.092 16.7251   1
  -3 -13   1 211.871 17.0228   1
   3 -13  -1 224.775 20.3140   1
  -3 -13   1 242.990 18.4737   1
   3 -13  -1 227.589 22.3423   1
  -3 -13   1 208.196 12.0469   3
  -3 -13   1 207.358 12.2803   3
  -3 -13   1 228.179 20.4326   2
  -3  13   1 203.883 14.8992   3
   3  13  -1 204.746 19.8424   2
  -3  13   1 230.539 20.1719   2
  -3  13   1 211.868 19.5265   1
  -3  13   1 175.203 21.1489   1
  -2 -13   1 329.658 22.9956   1
   2 -13  -1 310.549 25.1426   1
  -2 -13   1 303.883 24.9497   2
   2 -13  -1 376.825 28.1306   1
  -2 -13   1 321.833 23.9957   1
  -2  13   1 337.062 25.1289   1
   2  13  -1 331.950 18.1968   1
  -2  13   1 314.742 18.2465   3
  -2  13   1 358.250 23.8380   1
  -2  13   1 350.900 25.5336   2
   2  13  -1 354.034 25.8431   2
   2  13  -1 320.423 18.6757   1
  -1 -13   1 88.4668 14.2766   1
   1 -13  -1 125.443 16.6513   1
  -1 -13   1 74.4215 10.7959   1
   1 -13  -1 93.4333 13.7834   1
  -1  13   1 73.8535 11.5974   1
   1  13  -1 75.0743 13.0683   2
  -1  13   1 81.2037 14.2132   1
   1  13  -1 82.1247 9.37722   1
   1  13  -1 70.7831 10.3686   1
  -1  13   1 92.3399 12.3164   2
   0 -13   1 324.314 24.5819   1
   0 -13  -1 356.503 26.1088   1
   0 -13   1 352.397 26.1242   1
   0 -13  -1 336.311 24.1421   1
   0  13  -1 337.410 25.2849   2
   0  13   1 332.615 22.3504   1
   0  13   1 339.732 25.5825   2
   0  13  -1 337.441 22.4962   1
   0  13   1 341.958 21.7378   1
   0  13  -1 336.210 23.9524   1
   1 -13   1 88.3706 14.9041   1
   1 -13   1 113.056 15.4570   1
  -1 -13  -1 112.559 15.3729   1
  -1 -13  -1 93.1884 12.6750   1
   1  13   1 130.273 15.3126   2
   1  13   1 110.905 9.28466   1
  -1  13  -1 105.207 8.81513   3
  -1  13  -1 108.693 14.9499   2
  -1  13  -1 100.798 15.4269   1
  -1  13  -1 106.320 12.8952   1
  -2 -13  -1 23.4042 7.40716   1
   2 -13   1 21.4149 11.0070   1
  -2 -13  -1 19.7594 8.71932   1
   2 -13   1 16.6080 9.89560   1
  -2  13  -1 21.6660 9.28103   2
  -2  13  -1 22.7327 10.3100   1
  -2  13  -1 33.4446 9.41201   1
   2  13   1 13.4703 8.56075   2
  -2  13  -1 18.2056 5.32811   3
   3 -13   1 784.602 47.3256   1
  -3 -13  -1 784.327 43.7213   1
  -3 -13  -1 673.698 44.8074   2
   3 -13   1 674.863 46.1571   1
  -3 -13  -1 703.219 41.7809   1
  -3  13  -1 772.459 45.3787   2
  -3  13  -1 745.815 44.8683   1
  -3  13  -1 671.521 46.4581   1
   3  13   1 768.292 46.1761   2
  -3  13  -1 789.599 41.8924   3
  -4 -13  -1 49.7993 11.0266   1
  -4 -13  -1 49.4535 5.54399   3
  -4 -13  -1 46.3763 12.2597   2
  -4 -13  -1 64.4931 9.69577   1
   4 -13   1 76.3762 14.7389   1
  -4  13  -1 57.0950 11.6756   2
  -4  13  -1 76.4184 10.3811   3
  -4  13  -1 84.4515 14.3817   1
   4  13   1 72.7265 12.8784   2
  -4  13  -1 59.0396 13.9928   1
  -5 -13  -1 16.2588 12.5023   2
   5 -13   1 41.5403 13.5514   1
  -5 -13  -1 31.9481 6.81324   1
  -5 -13  -1 35.1710 8.46245   1
  -5 -13  -1 48.5994 7.96922   3
  -5  13  -1 32.8103 9.06563   3
  -5  13  -1 43.9964 12.0977   1
   5  13   1 18.2079 10.2026   2
  -5  13  -1 38.3366 18.2415   1
  -5  13  -1 31.0671 10.8457   2
   6 -13   1 258.603 26.5341   1
  -6 -13  -1 247.204 18.0212   3
  -6 -13  -1 228.819 22.2825   4
  -6 -13  -1 231.968 16.3341   1
  -6  13  -1 273.463 22.6108   2
  -6  13  -1 237.558 23.5092   1
   6  13   1 232.723 24.0490   2
  -6  13  -1 267.065 22.3559   3
  -7 -13  -1 102.954 9.65626   1
  -7 -13  -1 109.997 14.6580   3
   7 -13   1 81.4627 17.9345   1
  -7 -13  -1 93.2834 14.9307   4
  -7 -13  -1 78.4943 10.7178   1
  -7  13  -1 109.188 18.0860   2
  -7  13  -1 91.7142 17.0971   1
  -7  13  -1 71.7933 13.8244   3
   8 -13   1 55.7007 17.1370   1
  -8 -13  -1 74.7869 13.2235   3
  -8 -13  -1 90.8243 14.7945   4
  -8 -13  -1 73.2542 7.91645   1
  -8 -13  -1 66.9527 9.36625   1
  -8  13  -1 81.6584 17.6525   1
  -8  13  -1 68.1504 15.5060   3
   9 -13   1 57.6441 17.9240   1
  -9 -13  -1 43.0481 13.1828   4
  -9 -13  -1 -2.0880 12.7685   3
  -9  13  -1 23.2969 14.3210   3
  -9  13  -1 33.1829 16.5194   1
 -10 -13  -1 65.2146 14.6310   4
 -10 -13  -1 51.9043 16.1994   3
  10 -13   1 36.1748 15.3126   4
  10 -13   1 64.1295 19.9466   1
 -10  13  -1 41.1457 17.5839   1
 -10  13  -1 12.4003 16.3022   3
 -11 -13  -1 39.2538 19.0259   3
  11 -13   1 51.4510 22.3529   1
 -11  13  -1 9.65339 18.9546   3
 -11  13  -1 25.5678 21.7756   1
  12 -14  -1 -0.8442 29.3111   1
 -12  14   1 -27.481 27.6582   1
 -12  14   1 38.1518 22.9867   3
  11 -14  -1 38.3581 23.3489   1
 -11 -14   1 -11.158 15.4474   4
 -11  14   1 12.1013 20.1002   1
 -11  14   1 42.5524 20.4547   3
  10 -14  -1 14.8046 19.8264   1
 -10 -14   1 36.7242 15.8299   3
 -10 -14   1 3.64602 16.3418   4
 -10  14   1 40.0337 16.0322   3
 -10  14   1 14.2139 17.6551   1
   9 -14  -1 110.200 21.1860   1
  -9 -14   1 102.306 16.3270   3
   9 -14  -1 81.9332 16.5365   4
  -9  14   1 89.6968 17.1408   3
  -9  14   1 61.7889 18.2686   1
  -8 -14   1 272.601 24.7751   3
  -8 -14   1 275.101 18.3891   1
   8 -14  -1 209.155 25.7049   4
   8 -14  -1 300.700 32.1147   1
  -8 -14   1 266.886 25.4767   4
  -8  14   1 319.670 26.7469   3
  -8  14   1 297.054 28.0997   1
  -7 -14   1 104.654 12.9465   1
  -7 -14   1 104.060 16.3470   4
  -7 -14   1 113.312 14.8314   3
  -7 -14   1 88.1802 11.9365   1
   7 -14  -1 92.6401 19.6337   1
   7  14  -1 88.5422 19.4171   2
  -7  14   1 117.412 19.4940   1
  -7  14   1 108.855 15.7606   3
  -6 -14   1 205.508 23.6096   4
   6 -14  -1 257.573 39.0811   1
  -6 -14   1 203.355 17.1974   3
  -6 -14   1 237.483 18.0985   1
   6  14  -1 253.926 23.3433   2
  -6  14   1 234.216 24.7002   1
  -6  14   1 257.981 23.3769   2
  -6  14   1 231.281 20.9492   3
  -5 -14   1 100.965 13.3189   1
   5 -14  -1 98.2139 18.3792   1
  -5 -14   1 86.5806 14.9283   4
  -5 -14   1 75.7895 12.6338   3
  -5 -14   1 68.9747 12.4637   1
  -5 -14   1 94.2611 9.74773   3
  -5  14   1 86.6790 13.0465   3
  -5  14   1 99.7094 16.6572   2
  -5  14   1 80.3268 18.4126   1
   5  14  -1 87.8078 15.1668   2
  -5  14   1 79.6594 14.5902   1
  -4 -14   1 650.021 40.2079   4
   4 -14  -1 592.733 42.0576   1
  -4 -14   1 561.541 31.9833   3
  -4 -14   1 570.148 31.8302   3
  -4 -14   1 675.408 37.4512   1
  -4 -14   1 618.246 35.9620   1
   4 -14  -1 611.454 52.5353   1
  -4  14   1 617.767 39.7380   1
  -4  14   1 625.104 39.9459   2
  -4  14   1 599.779 34.5052   3
   4  14  -1 584.202 39.5333   2
  -4  14   1 498.648 40.6783   1
   3 -14  -1 133.412 19.4905   1
  -3 -14   1 95.2061 13.5024   1
   3 -14  -1 107.609 18.0055   1
  -3 -14   1 101.609 14.3921   1
  -3  14   1 88.7238 14.9183   1
   3  14  -1 120.915 16.7156   2
  -3  14   1 116.776 16.5635   2
  -3  14   1 101.146 16.0543   1
   2 -14  -1 203.638 22.4930   1
  -2 -14   1 227.467 18.8847   1
   2 -14  -1 199.619 19.1797   1
  -2 -14   1 201.431 17.5044   1
   2  14  -1 170.488 10.4733   1
  -2  14   1 152.077 10.0657   3
  -2  14   1 188.939 18.0279   1
   2  14  -1 175.731 19.2652   2
  -2  14   1 188.284 19.3584   2
  -2  14   1 151.641 18.7222   1
  -1 -14   1 205.714 19.3793   1
  -1 -14   1 175.668 17.3746   1
   1 -14  -1 176.353 18.8694   1
   1 -14  -1 174.100 20.5949   1
  -1  14   1 161.600 15.6937   1
   1  14  -1 153.656 14.5214   1
   1  14  -1 183.884 13.7519   1
   1  14  -1 132.578 18.0177   2
  -1  14   1 164.586 17.2043   1
  -1  14   1 161.213 18.5755   2
   0 -14  -1 582.193 36.8690   1
   0 -14   1 674.955 39.3891   1
   0 -14   1 618.336 37.4208   1
   0 -14  -1 649.596 39.3386   1
   0  14  -1 517.117 36.8400   1
   0  14  -1 570.038 34.6480   1
   0  14  -1 558.068 37.7174   2
   0  14   1 536.742 34.3349   1
   0  14   1 559.203 33.8597   1
   0  14   1 560.270 38.0607   2
  -1 -14  -1 86.9244 14.2116   1
  -1 -14  -1 135.264 14.9135   1
   1 -14   1 111.091 15.9717   1
   1 -14   1 117.199 16.8837   1
  -1  14  -1 90.3386 15.5239   2
   1  14   1 117.589 16.2600   2
  -1  14  -1 107.390 14.1611   1
   1  14   1 109.285 9.66974   1
  -1  14  -1 107.681 8.90020   3
  -1  14  -1 90.0428 13.9881   1
  -2 -14  -1 366.383 26.4409   1
   2 -14   1 282.475 26.7901   1
   2 -14   1 337.329 28.0173   1
  -2 -14  -1 310.957 24.1996   1
  -2  14  -1 393.549 26.2530   1
  -2  14  -1 357.732 28.0469   1
  -2  14  -1 372.989 22.0068   3
   2  14   1 381.244 30.7341   2
  -2  14  -1 368.333 27.2877   2
   3 -14   1 -1.3079 11.9387   1
  -3 -14  -1 1.28808 7.34870   1
   3 -14   1 -5.0190 11.6473   1
  -3 -14  -1 2.21914 8.07012   1
  -3 -14  -1 -4.5638 10.3515   2
  -3  14  -1 -3.5564 12.0915   1
  -3  14  -1 -5.5089 9.02426   2
   3  14   1 5.20278 9.91678   2
  -3  14  -1 3.59342 5.73572   3
  -3  14  -1 6.24924 9.29448   1
   4 -14   1 490.367 35.9884   1
  -4 -14  -1 493.041 31.5974   1
  -4 -14  -1 464.148 29.8494   1
  -4 -14  -1 502.513 38.6377   2
   4  14   1 478.084 35.0349   2
  -4  14  -1 519.530 33.9699   2
  -4  14  -1 490.501 34.6350   1
  -4  14  -1 430.710 36.5306   1
  -4  14  -1 487.944 30.6333   3
  -5 -14  -1 309.270 22.4656   3
  -5 -14  -1 384.576 24.7847   1
  -5 -14  -1 314.319 29.2235   1
   5 -14   1 360.798 30.4813   1
  -5  14  -1 382.645 28.8552   1
  -5  14  -1 346.588 25.4814   3
  -5  14  -1 380.362 28.6719   2
   5  14   1 369.002 28.6249   2
   6 -14   1 163.639 23.6520   1
  -6 -14  -1 131.517 13.3858   1
  -6 -14  -1 176.032 13.4897   3
  -6 -14  -1 173.348 19.8906   4
  -6 -14  -1 170.314 16.1551   1
   6  14   1 120.798 19.5041   2
  -6  14  -1 102.108 18.0197   2
  -6  14  -1 140.601 18.9185   3
  -6  14  -1 125.391 22.2507   1
  -7 -14  -1 168.930 16.6490   3
  -7 -14  -1 166.734 21.3421   4
  -7 -14  -1 156.327 13.6834   1
   7 -14   1 148.320 25.3394   1
  -7  14  -1 148.696 23.1835   1
  -7  14  -1 171.801 22.3112   2
  -7  14  -1 193.918 20.3543   3
   8 -14   1 148.379 23.1935   1
  -8 -14  -1 148.322 18.3812   3
  -8 -14  -1 146.470 22.5475   4
  -8 -14  -1 133.395 13.1834   1
  -8  14  -1 127.128 21.4788   1
  -8  14  -1 123.620 18.6328   3
   9 -14   1 133.452 22.2951   1
  -9 -14  -1 141.377 22.5864   4
  -9 -14  -1 125.331 21.8705   3
  -9  14  -1 129.479 22.5461   1
  -9  14  -1 109.826 20.2534   3
  -9  14  -1 98.0254 18.1345   2
 -10 -14  -1 63.1455 17.6834   3
  10 -14   1 63.5860 22.2857   1
 -10 -14  -1 28.2866 18.4933   4
 -10  14  -1 3.14406 17.7424   3
 -10  14  -1 21.8766 16.5575   2
 -10  14  -1 -4.0449 18.3321   1
  11 -14   1 10.2361 22.1866   1
 -11  14  -1 -1.5295 23.1212   1
 -11  14  -1 -23.252 20.3788   3
 -11  14  -1 20.3361 19.3478   2
 -11 -15   1 12.7595 29.7452   4
  11 -15  -1 28.0740 25.8836   1
 -11  15   1 -0.1807 23.2515   1
 -11  15   1 -4.8227 19.4593   3
  10 -15  -1 6.40702 21.1399   1
 -10 -15   1 -2.7880 15.5614   3
 -10 -15   1 -4.1433 14.7643   4
 -10  15   1 -16.029 15.0265   3
 -10  15   1 -6.1519 17.5790   1
  -9 -15   1 70.9483 16.1497   4
   9 -15  -1 67.5887 26.1357   1
  -9 -15   1 77.4310 15.5580   3
  -9  15   1 108.825 21.0403   1
  -9  15   1 90.6809 21.2559   3
  -8 -15   1 118.957 14.6920   1
  -8 -15   1 125.740 19.6830   4
   8 -15  -1 101.974 22.3240   1
  -8 -15   1 141.534 19.1338   3
  -8  15   1 167.096 22.5267   3
  -8  15   1 153.840 22.8402   1
  -7 -15   1 123.223 15.4325   1
  -7 -15   1 162.930 16.4415   3
  -7 -15   1 171.594 15.9292   1
   7 -15  -1 212.866 28.1953   1
  -7  15   1 140.885 22.8247   2
  -7  15   1 148.072 23.6629   1
  -7  15   1 141.280 19.8122   3
   7  15  -1 175.500 22.4164   2
  -6 -15   1 61.6242 8.58909   3
  -6 -15   1 87.1327 13.4673   1
  -6 -15   1 57.8840 8.59656   3
   6 -15  -1 39.3125 17.5227   1
  -6 -15   1 58.0648 10.6295   1
  -6 -15   1 45.0154 14.1510   4
  -6  15   1 55.2647 11.4999   3
  -6  15   1 48.1448 17.2986   1
   6  15  -1 71.4881 14.5906   2
  -5 -15   1 90.8463 16.0802   4
  -5 -15   1 94.0442 8.48046   3
  -5 -15   1 86.1614 12.6613   1
  -5 -15   1 100.943 14.4068   1
  -5 -15   1 81.4129 8.58564   3
  -5  15   1 102.964 16.4112   1
  -5  15   1 127.917 18.3838   2
   5  15  -1 93.1189 18.5211   2
  -5  15   1 97.4112 14.0708   3
  -4 -15   1 234.771 20.7293   1
  -4 -15   1 234.836 19.5079   1
   4 -15  -1 195.291 27.2188   1
  -4 -15   1 242.695 23.0079   4
  -4  15   1 191.829 22.1092   2
  -4  15   1 233.742 16.6181   3
  -4  15   1 241.241 22.9866   1
  -4  15   1 198.163 26.6317   1
   4  15  -1 205.152 22.3524   2
  -3 -15   1 202.423 19.9280   1
   3 -15  -1 165.377 24.4515   1
  -3 -15   1 173.596 18.2359   1
  -3  15   1 239.214 21.7481   2
  -3  15   1 217.755 20.6168   1
   3  15  -1 198.452 21.0680   2
  -3  15   1 202.313 24.0206   1
  -3  15   1 154.533 15.7454   3
   2 -15  -1 122.050 18.9563   1
   2 -15  -1 117.878 20.6862   1
  -2 -15   1 148.771 17.2541   1
  -2 -15   1 162.042 18.0491   1
   2  15  -1 123.705 17.9211   2
  -2  15   1 125.647 16.6593   1
  -2  15   1 109.907 18.7799   1
  -2  15   1 150.164 18.7262   2
  -1 -15   1 60.9547 13.0605   1
  -1 -15   1 49.6824 11.9567   1
   1 -15  -1 59.4539 14.0379   1
   1 -15  -1 56.4244 12.6494   1
  -1  15   1 33.8314 10.4905   1
   1  15  -1 43.5702 8.53144   1
  -1  15   1 43.1638 10.2467   1
  -1  15   1 39.8506 11.8090   2
   1  15  -1 44.4158 7.74080   1
   1  15  -1 54.4972 13.1667   2
   0 -15  -1 10.8808 10.1282   1
   0 -15   1 -6.9050 10.3854   1
   0 -15   1 10.2466 10.7485   1
   0 -15  -1 -3.6348 10.9293   1
   0  15   1 4.67219 6.64243   1
   0  15   1 12.0112 9.98954   2
   0  15  -1 8.78351 7.50060   1
   0  15  -1 11.4090 9.02171   1
   0  15  -1 14.2330 9.65690   2
   0  15   1 17.0961 8.24094   1
  -1 -15  -1 153.108 19.6111   1
   1 -15   1 160.874 20.0221   1
   1 -15   1 185.814 20.3190   1
  -1  15  -1 147.103 19.3614   2
   1  15   1 186.956 20.1178   2
   1  15   1 156.171 11.7849   1
  -1  15  -1 188.765 17.9345   1
  -1  15  -1 158.997 20.1555   1
  -2 -15  -1 41.8766 10.0591   1
  -2 -15  -1 27.5149 11.3407   1
   2 -15   1 23.3546 13.0111   1
   2 -15   1 2.79394 14.1500   1
  -2  15  -1 20.0164 6.05280   3
  -2  15  -1 23.3963 10.6341   1
  -2  15  -1 14.8089 10.3060   2
  -2  15  -1 3.65711 12.2896   1
   2  15   1 40.4979 11.3806   2
  -3 -15  -1 98.4221 14.9902   1
  -3 -15  -1 96.4923 15.1707   1
   3 -15   1 121.412 18.9611   1
   3  15   1 111.893 18.3688   2
  -3  15  -1 89.2632 17.4507   1
  -3  15  -1 122.744 17.7730   1
  -3  15  -1 96.6318 15.3792   2
  -3  15  -1 122.136 12.4775   3
   4 -15   1 35.9068 15.3840   1
  -4 -15  -1 33.0990 9.32108   1
  -4 -15  -1 42.4288 11.0922   1
  -4  15  -1 46.0840 12.8730   2
  -4  15  -1 43.5274 9.23919   3
   4  15   1 35.9898 12.3665   2
  -4  15  -1 51.6254 12.9870   1
  -5 -15  -1 267.718 21.5279   1
  -5 -15  -1 208.453 12.4398   3
  -5 -15  -1 243.460 19.3224   1
   5 -15   1 249.056 26.2666   1
   5  15   1 227.641 27.3922   2
  -5  15  -1 258.347 23.7452   2
  -5  15  -1 228.444 20.6470   3
  -6 -15  -1 119.640 18.0799   4
  -6 -15  -1 93.1898 13.6080   1
  -6 -15  -1 92.1062 14.0071   3
   6 -15   1 107.584 19.5073   1
  -6 -15  -1 103.701 15.1394   1
   6  15   1 85.6727 16.9858   2
  -6  15  -1 112.662 18.3441   2
  -6  15  -1 119.872 18.6598   1
  -6  15  -1 100.912 14.8171   3
  -7 -15  -1 143.657 16.5270   1
  -7 -15  -1 129.433 14.6838   3
   7 -15   1 105.197 21.0328   1
  -7  15  -1 99.9958 16.3088   3
  -7  15  -1 69.3991 17.3511   1
  -7  15  -1 77.0005 19.6252   2
   7  15   1 112.368 19.3704   2
   8 -15   1 49.7704 19.8135   1
  -8 -15  -1 53.6790 11.9955   3
  -8 -15  -1 57.8430 24.1529   4
  -8  15  -1 46.0128 15.8626   2
  -8  15  -1 71.2217 17.5039   1
  -8  15  -1 34.8981 14.2539   3
  -9 -15  -1 142.238 22.3576   3
  -9 -15  -1 160.201 25.6717   4
   9 -15   1 166.430 28.1154   1
   9 -15   1 171.900 25.3605   4
  -9  15  -1 112.512 19.8936   2
  -9  15  -1 105.120 20.7670   3
  -9  15  -1 79.2130 21.2659   1
 -10 -15  -1 75.5605 19.4549   4
  10 -15   1 108.686 25.6917   1
 -10  15  -1 96.6564 21.2799   2
 -10  15  -1 81.3905 23.4483   1
 -10  15  -1 120.752 22.2856   3
  10 -16  -1 10.3316 23.6629   1
 -10 -16   1 19.4647 17.8043   4
 -10  16   1 15.8383 19.0554   2
 -10  16   1 18.8465 21.7052   1
 -10  16   1 45.9977 18.5102   3
  -9 -16   1 25.7056 16.9133   4
   9 -16  -1 52.1764 22.8696   1
  -9  16   1 59.8218 18.4007   2
  -9  16   1 48.7554 18.8356   1
  -8 -16   1 82.6916 13.3802   3
  -8 -16   1 69.0207 18.1204   4
   8 -16  -1 88.4032 22.3145   1
  -8  16   1 99.4959 17.5209   3
  -8  16   1 73.5454 19.0757   1
  -8  16   1 64.4297 17.3664   2
  -7 -16   1 44.3858 8.95504   3
   7 -16  -1 52.6815 19.1383   1
  -7 -16   1 67.2286 15.4328   4
  -7 -16   1 47.2612 10.7521   1
  -7  16   1 50.9545 13.3188   3
   7  16  -1 48.0752 15.3296   2
  -7  16   1 48.4524 15.9564   1
  -7  16   1 15.0256 14.1353   2
  -6 -16   1 21.4456 9.22964   3
   6 -16  -1 41.8306 17.3408   1
  -6 -16   1 27.2301 14.4316   4
  -6 -16   1 44.5052 10.9829   1
  -6 -16   1 41.0829 11.1314   1
  -6  16   1 34.2022 14.1823   2
  -6  16   1 38.5542 11.0392   3
  -6  16   1 51.2207 14.7703   1
   6  16  -1 41.5844 13.9249   2
  -5 -16   1 68.3324 25.1914   4
   5 -16  -1 102.961 20.1894   1
  -5 -16   1 107.831 16.6219   1
  -5 -16   1 139.361 17.9649   1
  -5  16   1 76.6964 16.6751   2
  -5  16   1 144.189 27.3494   1
  -5  16   1 94.4383 14.3461   3
   5  16  -1 89.1582 16.6362   2
  -4 -16   1 114.041 17.9175   1
  -4 -16   1 142.491 17.9750   1
  -4  16   1 133.376 18.8217   1
  -4  16   1 111.911 11.8732   3
  -4  16   1 98.7086 21.1629   1
  -3 -16   1 67.9197 13.6619   1
  -3 -16   1 44.5761 12.0385   1
  -3 -16   1 55.5483 13.8518   4
   3 -16  -1 45.8473 16.4797   1
  -3  16   1 37.3173 13.4098   2
   3  16  -1 70.2279 14.9208   2
  -3  16   1 48.7954 6.19414   3
  -3  16   1 48.9294 12.2956   1
  -3  16   1 38.4120 14.5481   1
  -2 -16   1 68.9385 13.9624   1
  -2 -16   1 93.2507 14.4255   1
   2 -16  -1 95.4389 17.1855   1
   2  16  -1 60.3859 14.4446   2
  -2  16   1 66.6235 14.3662   2
  -2  16   1 70.7825 12.7026   1
  -2  16   1 57.3047 14.2540   1
  -1 -16   1 76.4446 13.9643   1
  -1 -16   1 88.0070 15.5761   1
   1 -16  -1 82.3761 14.9071   1
   1 -16  -1 92.0240 17.1648   1
  -1  16   1 66.4096 13.3570   1
  -1  16   1 93.6319 15.9976   2
   1  16  -1 62.5457 15.0125   2
   1  16  -1 86.8610 11.3221   1
   1  16  -1 90.7948 12.8373   1
  -1  16   1 71.1769 11.6859   1
   0 -16  -1 95.3920 17.3490   1
   0 -16  -1 112.108 18.8336   1
   0 -16   1 130.161 19.1035   1
   0 -16   1 123.611 21.3800   1
   0  16   1 128.718 18.8843   2
   0  16  -1 98.7509 17.2968   1
   0  16  -1 160.140 19.1171   2
   0  16   1 128.708 13.7307   1
   0  16   1 117.886 19.6109   1
   0  16  -1 149.305 15.5048   1
   1 -16   1 22.5856 13.1430   1
  -1 -16  -1 46.9969 12.4964   1
  -1 -16  -1 16.2843 12.5164   1
  -1  16  -1 8.24781 11.8002   1
   1  16   1 10.5550 11.4593   2
  -1  16  -1 21.0314 11.6712   2
   1  16   1 25.0011 4.67141   1
  -1  16  -1 25.8052 10.5748   1
   2 -16   1 18.4902 13.7034   1
  -2 -16  -1 31.4695 10.9581   1
  -2 -16  -1 20.1029 12.0121   1
  -2  16  -1 52.0654 12.8078   2
  -2  16  -1 23.1403 14.0234   1
   2  16   1 51.4877 13.1075   2
  -2  16  -1 26.6576 10.8622   1
   3 -16   1 30.2914 15.6397   1
  -3 -16  -1 34.6656 11.1390   1
  -3 -16  -1 45.9050 12.9165   1
   3  16   1 47.9732 16.1926   2
  -3  16  -1 53.8145 8.21568   3
  -3  16  -1 42.5068 12.6327   1
  -3  16  -1 46.6917 17.5235   1
  -3  16  -1 37.0440 13.1375   2
  -4 -16  -1 55.4992 13.4947   1
  -4 -16  -1 72.2258 12.2024   1
   4 -16   1 57.6342 16.7598   1
  -4  16  -1 73.9180 14.8757   1
   4  16   1 68.9604 19.1659   2
  -4  16  -1 74.7369 10.9890   3
  -4  16  -1 53.8141 14.2482   2
  -5 -16  -1 60.1422 12.9873   1
   5 -16   1 47.0715 17.7036   1
  -5 -16  -1 39.3580 10.7726   1
  -5  16  -1 73.1393 12.1368   3
  -5  16  -1 46.5070 14.3672   1
   5  16   1 85.4120 16.5240   2
  -6 -16  -1 102.883 14.4678   1
  -6 -16  -1 86.8609 7.86289   3
  -6 -16  -1 103.604 17.6433   4
   6 -16   1 69.1541 19.1903   1
  -6 -16  -1 78.0845 7.16037   3
  -6 -16  -1 113.266 15.5868   1
  -6  16  -1 67.0890 14.0504   3
  -6  16  -1 73.5830 16.8197   1
   6  16   1 72.5888 17.4296   2
  -6  16  -1 49.7609 15.1276   2
  -7 -16  -1 25.6398 15.9849   4
   7 -16   1 7.63341 17.3342   1
  -7 -16  -1 19.8782 8.07067   3
  -7 -16  -1 31.2490 10.9285   1
  -7  16  -1 48.6701 16.6866   1
   7  16   1 19.7481 14.5552   2
  -7  16  -1 25.1083 13.8618   3
  -7  16  -1 34.8625 14.6451   2
   8 -16   1 130.647 24.7986   1
  -8 -16  -1 159.611 26.7142   4
  -8  16  -1 97.2414 21.2686   1
  -8  16  -1 124.001 20.2920   2
   9 -16   1 13.2609 17.5591   4
   9 -16   1 53.6614 22.0072   1
  -9 -16  -1 37.8393 17.1359   4
  -9  16  -1 49.6329 19.3680   1
  -9  16  -1 38.5387 17.3452   3
  -9  16  -1 34.6977 18.5373   2
 -10 -16  -1 61.7919 21.3716   4
  10 -16   1 67.5393 26.3174   1
 -10  16  -1 23.1273 22.9700   1
 -10  16  -1 88.4983 22.1062   2
 -10  16  -1 34.4103 20.1802   3
  10 -17  -1 -52.553 26.7267   1
 -10 -17   1 5.77337 19.9680   4
 -10  17   1 -15.061 19.9551   2
 -10  17   1 2.15708 23.5623   1
 -10  17   1 -4.5409 19.4539   3
   9 -17  -1 57.8681 24.4137   1
  -9 -17   1 57.6438 20.0737   4
  -9  17   1 55.6850 23.0260   1
  -9  17   1 33.8538 22.5266   3
  -9  17   1 50.0213 19.8838   2
  -8 -17   1 -1.2086 17.1636   4
   8 -17  -1 17.0961 21.2090   1
  -8  17   1 23.0925 18.5080   1
  -8  17   1 22.2558 14.8924   3
  -8  17   1 20.3596 15.9607   2
  -7 -17   1 65.4395 13.0161   1
   7 -17  -1 51.6606 20.5021   1
  -7 -17   1 49.5385 16.9246   4
   7  17  -1 26.8661 16.1545   2
  -7  17   1 65.4488 17.4888   2
  -7  17   1 49.3625 14.2933   3
  -7  17   1 66.2141 18.5801   1
  -6 -17   1 45.9146 16.1461   4
  -6 -17   1 71.4478 13.3450   1
   6 -17  -1 50.9416 19.3845   1
   6  17  -1 74.7498 16.3507   2
  -6  17   1 48.1982 26.0673   1
  -6  17   1 51.4764 11.9844   3
  -6  17   1 48.3038 15.7865   2
   5 -17  -1 178.066 25.9671   1
  -5 -17   1 126.813 19.4845   1
  -5 -17   1 155.109 22.4687   4
  -5 -17   1 121.084 20.4368   1
  -5  17   1 127.152 15.4719   3
  -5  17   1 109.719 19.3223   1
   5  17  -1 96.3957 18.1528   2
  -5  17   1 122.690 19.3968   2
   4 -17  -1 235.930 28.1989   1
  -4 -17   1 244.029 24.1241   1
  -4 -17   1 212.558 25.2836   4
  -4 -17   1 233.172 23.4211   1
  -4  17   1 216.569 24.8288   2
  -4  17   1 223.453 16.5032   3
  -4  17   1 248.452 24.8736   1
   4  17  -1 209.563 24.6095   2
  -3 -17   1 312.516 26.3358   1
  -3 -17   1 241.741 26.3236   4
  -3 -17   1 200.788 24.6322   1
  -3  17   1 253.077 26.1214   2
  -3  17   1 281.537 25.4168   1
   3  17  -1 257.304 26.9342   2
  -3  17   1 231.317 29.3971   1
  -2 -17   1 20.5411 13.0227   1
   2 -17  -1 9.36561 14.3723   1
  -2 -17   1 13.2382 13.9167   1
  -2  17   1 24.2984 13.3548   2
   2  17  -1 33.7773 13.5182   2
  -2  17   1 27.0854 14.0589   1
  -2  17   1 28.7279 11.3006   1
  -1 -17   1 287.598 28.1803   1
   1 -17  -1 260.337 29.1140   1
  -1 -17   1 294.634 27.0342   1
  -1  17   1 266.919 30.4195   2
   1  17  -1 253.781 20.0770   1
  -1  17   1 238.019 24.5114   1
  -1  17   1 269.047 22.2896   1
   1  17  -1 257.930 18.6710   1
   0 -17  -1 18.3580 14.7193   1
   0 -17   1 27.1565 14.2749   1
   0  17   1 17.9158 14.8361   2
   0  17  -1 46.3899 10.0634   1
   0  17  -1 33.2497 11.8101   1
   0  17   1 28.1798 15.1183   1
   0  17   1 30.1765 8.81755   1
   1 -17   1 243.015 28.1590   1
  -1 -17  -1 243.567 26.5190   1
  -1 -17  -1 287.027 27.6950   1
  -1  17  -1 294.018 23.6358   1
   1  17   1 247.855 26.1287   2
  -1  17  -1 244.993 26.5556   1
   2 -17   1 51.4156 24.3852   1
  -2 -17  -1 73.6182 14.5317   1
  -2 -17  -1 62.6567 16.5069   1
   2  17   1 73.9242 16.0174   2
  -2  17  -1 64.8870 17.7372   1
  -2  17  -1 85.1024 15.3346   1
  -3 -17  -1 47.8133 13.5596   1
   3 -17   1 33.6584 16.2787   1
  -3 -17  -1 53.3755 14.3546   1
  -3  17  -1 64.4964 17.9775   2
  -3  17  -1 83.8834 11.5963   3
   3  17   1 66.1393 15.9262   2
  -3  17  -1 68.5790 14.8307   1
   4 -17   1 34.2714 16.6913   1
  -4 -17  -1 50.7234 14.2368   1
  -4 -17  -1 29.3152 12.5031   1
  -4  17  -1 45.6366 9.95008   3
   4  17   1 38.6580 14.6999   2
  -4  17  -1 44.3466 13.9026   2
   5 -17   1 36.6784 17.5302   1
  -5 -17  -1 31.9222 14.4410   4
  -5 -17  -1 39.7698 13.5377   1
  -5 -17  -1 21.8364 12.4121   1
  -5  17  -1 85.2462 17.1965   1
  -5  17  -1 45.7976 14.9256   2
   5  17   1 48.0545 15.6335   2
  -5  17  -1 41.5003 11.6835   3
   6 -17   1 16.7533 18.3467   1
  -6 -17  -1 28.1151 12.8978   1
  -6 -17  -1 5.45960 13.9052   4
  -6  17  -1 23.5671 14.6476   2
  -6  17  -1 52.1537 16.3056   1
  -6  17  -1 5.37650 12.3958   3
   6  17   1 4.90311 14.4455   2
  -7 -17  -1 78.4798 19.0088   4
   7 -17   1 109.245 22.7556   1
  -7  17  -1 104.072 20.2922   2
   7  17   1 72.0928 18.7346   2
  -7  17  -1 147.067 24.1062   3
  -7  17  -1 124.291 22.0571   1
   8 -17   1 54.4007 22.1496   1
  -8 -17  -1 19.2372 18.3964   4
  -8  17  -1 3.30874 18.3041   1
  -8  17  -1 15.6335 17.6977   2
   9 -17   1 53.3552 25.3645   1
   9 -17   1 65.0180 20.8553   4
  -9 -17  -1 82.2853 20.5815   4
  -9  17  -1 46.0317 23.2425   1
  -9  17  -1 57.1883 20.4866   2
  -9  17  -1 80.4661 20.9091   3
   9 -18  -1 -9.3790 26.5473   1
  -9 -18   1 18.1481 20.6184   4
  -9  18   1 7.77619 24.0443   3
  -9  18   1 -7.3763 20.3059   2
  -9  18   1 4.52623 21.5220   1
   8 -18  -1 34.5199 23.2111   1
  -8 -18   1 2.17067 18.1696   4
  -8  18   1 19.7505 18.3513   1
  -8  18   1 -10.776 17.2563   2
  -8  18   1 26.8165 16.3956   3
   7 -18  -1 74.5872 23.5886   1
  -7 -18   1 50.1980 19.1935   4
  -7  18   1 87.1802 20.5993   1
   7  18  -1 56.9294 18.0284   2
  -7  18   1 63.0453 15.2606   3
  -7  18   1 90.0320 19.6271   2
   6 -18  -1 147.832 26.9232   1
  -6 -18   1 169.490 22.5607   1
  -6 -18   1 158.581 25.8875   4
   6  18  -1 152.077 24.1090   2
  -6  18   1 161.145 24.5754   1
  -6  18   1 124.985 19.1220   3
  -6  18   1 108.996 20.8061   2
  -5 -18   1 -18.479 13.4998   4
   5 -18  -1 39.8990 20.1442   1
  -5 -18   1 33.3427 15.1934   1
  -5 -18   1 49.7545 14.2199   1
  -5  18   1 11.5034 15.0297   2
  -5  18   1 33.6190 8.94234   3
  -5  18   1 14.0989 13.9211   1
   5  18  -1 6.47728 14.2371   2
   4 -18  -1 134.639 23.0964   1
  -4 -18   1 103.968 18.2086   1
  -4 -18   1 127.578 20.4177   4
  -4 -18   1 158.133 22.8031   1
  -4  18   1 145.302 22.9489   2
   4  18  -1 116.528 20.2128   2
  -3 -18   1 143.900 23.1962   1
  -3 -18   1 120.486 20.4393   1
   3 -18  -1 206.134 29.6264   1
  -3 -18   1 164.021 24.1249   4
  -3  18   1 138.758 22.4075   1
  -3  18   1 159.231 23.1344   2
   3  18  -1 145.014 22.9908   2
  -3  18   1 150.265 21.7633   1
  -2 -18   1 370.616 32.4162   4
   2 -18  -1 295.843 38.6425   1
  -2 -18   1 445.574 33.5012   1
  -2  18   1 405.717 29.8275   1
  -2  18   1 342.255 33.2126   1
  -2  18   1 375.385 32.7242   2
   2  18  -1 344.700 32.2351   2
  -1 -18   1 22.6277 13.8568   1
   1 -18  -1 5.54767 15.7297   1
   1  18  -1 26.6795 13.8917   2
   1  18  -1 31.3430 7.92664   1
  -1  18   1 24.5820 13.2560   1
   1  18  -1 17.8866 8.43267   1
  -1  18   1 28.5055 11.0868   1
  -1  18   1 43.7993 14.5135   2
   0 -18   1 267.938 29.3376   1
   0 -18  -1 287.521 30.3848   1
   0  18   1 272.708 28.3026   2
   0  18  -1 295.976 23.1799   1
   0  18   1 293.598 21.1371   1
   0  18   1 313.408 29.2335   1
   0  18  -1 241.247 27.5991   2
  -1 -18  -1 50.3524 15.9523   1
   1  18   1 47.0453 15.0321   2
  -1  18  -1 10.1812 14.7357   1
  -1  18  -1 31.3131 14.1183   2
  -1  18  -1 29.3185 11.8558   1
  -2 -18  -1 0.47260 14.4893   1
   2 -18   1 -8.6838 15.7786   1
  -2 -18  -1 -3.3175 15.2263   1
  -2  18  -1 19.0525 13.3628   2
  -2  18  -1 12.4325 17.4235   1
   2  18   1 28.0253 14.1236   2
  -2  18  -1 0.14948 11.8924   1
  -3 -18  -1 42.6246 15.8252   1
  -3 -18  -1 44.3970 16.3624   1
   3 -18   1 85.1325 19.7010   1
  -3  18  -1 60.7790 15.8769   2
   3  18   1 51.8312 15.8917   2
  -3  18  -1 61.5779 15.3301   1
  -3  18  -1 42.9476 8.32505   3
  -4 -18  -1 -2.4291 13.9272   1
   4 -18   1 -21.888 16.2402   1
  -4 -18  -1 -17.034 14.2396   1
  -4  18  -1 6.18531 13.5867   1
  -4  18  -1 -20.251 12.8645   2
   4  18   1 8.53916 14.2953   2
  -4  18  -1 -3.9079 8.57032   3
  -5 -18  -1 33.3054 16.7497   4
  -5 -18  -1 34.5525 15.1244   1
   5 -18   1 18.7463 18.1522   1
  -5  18  -1 55.6742 12.3985   3
  -5  18  -1 34.4553 16.4281   2
   5  18   1 42.1419 16.1858   2
  -5  18  -1 45.7038 16.6792   1
  -6 -18  -1 142.772 23.7668   4
  -6 -18  -1 228.767 25.8814   1
   6 -18   1 189.278 30.4619   1
  -6  18  -1 184.182 25.6136   2
   6  18   1 138.630 23.9861   2
  -6  18  -1 150.226 23.5471   3
   7 -18   1 34.8783 23.3804   1
  -7 -18  -1 42.1461 18.1956   4
  -7  18  -1 22.6207 15.8602   3
   7  18   1 0.56660 17.1771   2
  -7  18  -1 17.9342 17.0662   2
  -7  18  -1 -3.9887 16.9825   1
  -8 -18  -1 15.1148 19.9083   4
   8 -18   1 127.049 28.5310   1
   8 -18   1 84.7832 21.5567   4
  -8  18  -1 69.0983 23.4710   1
  -8  18  -1 29.6400 18.8395   3
  -8  18  -1 40.0660 20.8094   2
  -9 -18  -1 40.7482 26.7525   4
  -9  18  -1 50.0442 21.7917   2
   8 -19  -1 143.128 30.2828   1
  -8 -19   1 99.7259 23.5618   4
  -8  19   1 82.8677 24.9357   2
  -8  19   1 79.5794 25.9396   1
  -7 -19   1 112.451 22.4099   4
   7 -19  -1 106.365 27.0760   1
   7  19  -1 33.7379 18.9442   2
  -7  19   1 48.7968 20.6068   2
  -7  19   1 62.0343 20.0816   1
  -6 -19   1 57.5032 16.8117   1
  -6 -19   1 42.9631 18.9212   4
   6 -19  -1 32.2693 22.8289   1
  -6  19   1 44.8122 19.4529   2
   6  19  -1 50.1345 18.4440   2
  -6  19   1 45.8197 19.7372   1
  -5 -19   1 252.234 28.0377   1
  -5 -19   1 178.866 27.2820   4
   5 -19  -1 189.607 29.4893   1
   5  19  -1 143.759 24.0448   2
  -5  19   1 186.582 27.4567   2
  -5  19   1 180.006 27.2689   1
  -4 -19   1 88.4382 18.2337   1
   4 -19  -1 68.2762 21.7298   1
  -4 -19   1 95.4602 19.9038   4
  -4  19   1 77.4229 18.9691   2
   4  19  -1 58.0132 18.0611   2
  -4  19   1 107.966 19.1082   1
  -3 -19   1 106.199 20.0020   4
   3 -19  -1 125.450 24.1416   1
  -3 -19   1 118.290 19.9334   1
  -3  19   1 88.9651 19.4119   2
  -3  19   1 79.0422 16.6332   1
   3  19  -1 106.049 19.6550   2
  -2 -19   1 23.2174 14.6132   4
  -2 -19   1 43.3203 16.2373   1
   2 -19  -1 43.9711 19.1418   1
   2  19  -1 51.8614 15.6126   2
  -2  19   1 29.6037 18.0305   1
  -2  19   1 16.2811 15.2664   2
  -2  19   1 24.1498 13.4998   1
  -1 -19   1 97.4280 21.3598   1
   1 -19  -1 90.6318 21.2503   1
  -1  19   1 119.592 20.4616   2
   1  19  -1 120.947 20.8029   2
  -1  19   1 111.026 18.5989   1
   1  19  -1 134.099 20.6304   1
  -1  19   1 117.667 18.6627   1
   0 -19   1 -13.021 18.1316   1
   0  19   1 14.9856 14.7532   2
   0  19  -1 32.1506 15.9827   1
   0  19  -1 -7.7825 13.9920   2
   0  19  -1 12.4982 10.6852   1
   0  19   1 13.7968 8.57213   1
   1 -19   1 -3.0635 16.2577   1
  -1 -19  -1 12.6531 16.6381   1
  -1  19  -1 44.6315 17.0485   1
  -1  19  -1 13.0091 14.4874   2
  -1  19  -1 4.59791 11.9196   1
   1  19   1 20.3622 14.1443   2
  -2 -19  -1 17.4192 16.0502   1
   2 -19   1 -25.095 16.3452   1
  -2  19  -1 34.0666 13.7885   1
  -2  19  -1 31.4183 15.2774   2
  -2  19  -1 16.7076 19.5433   1
   2  19   1 18.6019 15.5143   2
  -3 -19  -1 9.21826 15.9657   1
   3 -19   1 35.5178 18.6530   1
  -3  19  -1 -3.4363 14.3124   2
   3  19   1 -16.029 14.6192   2
  -3  19  -1 -6.7016 16.5984   1
  -4 -19  -1 20.3780 16.3212   1
   4 -19   1 23.7579 19.8237   1
  -4  19  -1 29.6850 16.1607   2
  -4  19  -1 26.8689 14.9267   3
  -4  19  -1 3.04094 14.9171   1
   4  19   1 12.8124 15.2347   2
  -5 -19  -1 101.332 20.5854   4
   5 -19   1 125.284 24.2373   1
  -5 -19  -1 110.572 20.1028   1
   5  19   1 129.643 21.8465   2
  -5  19  -1 75.4404 19.4390   2
  -5  19  -1 78.9184 20.0800   1
  -5  19  -1 111.404 21.3943   3
  -6 -19  -1 -16.592 17.3949   4
   6 -19   1 -12.429 21.7952   1
   6  19   1 -10.210 16.1033   2
  -6  19  -1 -19.935 17.0884   1
  -6  19  -1 -31.406 16.4592   2
   7 -19   1 178.691 30.1139   1
  -7 -19  -1 152.296 26.2326   4
   7  19   1 113.066 23.4790   2
  -7  19  -1 132.240 24.7037   2
  -7  19  -1 152.857 26.8824   1
   8 -19   1 72.0582 24.1659   4
   8 -19   1 87.3085 31.8133   1
  -8 -19  -1 8.24162 22.5146   4
  -8  19  -1 30.5232 21.8435   2
  -8  19  -1 34.4490 24.5103   1
   7 -20  -1 182.897 34.5136   1
  -7  20   1 234.461 34.3207   2
  -7  20   1 115.913 27.2669   1
   7  20  -1 155.856 27.9399   2
   6 -20  -1 109.518 28.2760   1
  -6 -20   1 86.7392 22.8156   4
   6  20  -1 77.7198 21.1187   2
  -6  20   1 80.5939 22.9609   1
  -6  20   1 82.0457 22.2112   2
  -5 -20   1 55.3331 17.2278   1
  -5 -20   1 23.0375 19.6524   4
   5 -20  -1 35.5033 24.0577   1
  -5  20   1 49.1160 18.5303   1
   5  20  -1 -0.6473 17.5360   2
  -5  20   1 3.59220 18.0941   2
  -4 -20   1 171.467 26.1663   4
  -4 -20   1 208.512 29.3179   1
   4 -20  -1 125.033 26.3755   1
  -4  20   1 140.543 24.0060   2
  -4  20   1 181.240 27.1608   1
   4  20  -1 116.443 22.6239   2
  -3 -20   1 27.3182 17.1683   4
  -3 -20   1 38.2719 18.4870   1
   3 -20  -1 57.5242 22.9650   1
   3  20  -1 38.1353 17.2700   2
  -3  20   1 29.6489 17.9886   2
  -3  20   1 34.2937 23.5903   1
   2 -20  -1 187.696 32.9371   1
  -2 -20   1 189.481 27.3862   4
  -2  20   1 195.822 25.0116   1
  -2  20   1 149.008 24.3200   2
   2  20  -1 181.691 27.0129   2
  -1 -20   1 21.1394 17.1565   4
  -1 -20   1 36.2498 19.2452   1
   1 -20  -1 83.8676 21.6285   1
  -1  20   1 49.0681 17.3561   2
   1  20  -1 73.4463 18.2157   2
   0 -20   1 62.5268 21.0331   1
   0 -20  -1 124.637 22.9285   1
   0  20  -1 77.6959 13.5324   1
   0  20   1 83.9869 20.0862   2
   0  20  -1 96.3713 20.2996   2
  -1 -20  -1 48.5637 25.6548   1
   1 -20   1 -6.6618 17.9398   1
  -1  20  -1 13.9317 15.5552   2
   1  20   1 41.7634 17.6641   2
  -1  20  -1 6.07350 13.4285   1
  -2 -20  -1 -9.7539 18.0615   1
   2 -20   1 7.32125 18.1614   1
   2  20   1 -27.728 14.4548   2
  -2  20  -1 15.6419 14.5498   1
  -2  20  -1 6.97080 15.9743   2
  -3 -20  -1 29.4421 18.7139   1
   3 -20   1 45.9123 20.4245   1
  -3  20  -1 28.1997 16.7740   1
   3  20   1 14.0539 16.8621   2
  -3  20  -1 11.5921 16.9171   2
  -4 -20  -1 7.45669 18.0298   1
   4 -20   1 17.8647 20.6300   1
  -4 -20  -1 16.5370 17.9098   4
  -4  20  -1 39.5880 18.7619   1
   4  20   1 42.7459 18.8777   2
  -4  20  -1 6.58978 18.0349   2
  -5 -20  -1 24.7581 19.5783   4
   5 -20   1 35.2841 24.1000   1
  -5 -20  -1 32.0850 19.0984   1
  -5  20  -1 -16.346 17.4462   1
  -5  20  -1 16.8903 17.7522   2
   5  20   1 30.2134 19.4559   2
  -6 -20  -1 126.211 25.1657   4
   6 -20   1 61.9029 27.9778   1
  -6  20  -1 135.785 26.2760   1
   6  20   1 130.658 25.5950   2
  -6  20  -1 116.424 23.9960   2
   7 -20   1 49.8155 32.9736   1
  -7 -20  -1 28.4322 23.0980   4
   7 -20   1 67.9209 23.8865   4
   7  20   1 0.19593 22.3249   2
  -7  20  -1 24.7346 24.2416   1
  -7  20  -1 51.3888 22.7280   2
   6 -21  -1 142.962 35.0820   1
  -6 -21   1 121.278 28.6774   4
  -6  21   1 108.843 27.7658   2
  -6  21   1 123.052 25.1805   1
   6  21  -1 116.603 26.4487   2
   5 -21  -1 114.371 28.7887   1
  -5 -21   1 102.415 22.8937   1
  -5 -21   1 77.0555 23.6744   4
  -5  21   1 89.6082 22.9089   1
   5  21  -1 71.2257 22.3192   2
  -5  21   1 83.0357 24.1424   2
  -4 -21   1 25.1714 21.0175   4
   4 -21  -1 -13.978 22.3889   1
   4  21  -1 -0.3868 19.2559   2
  -4  21   1 -19.914 17.5160   1
  -4  21   1 29.2716 20.1018   2
   3 -21  -1 33.1213 22.9037   1
  -3 -21   1 46.2774 21.0739   4
  -3 -21   1 56.7147 20.8464   1
  -3  21   1 33.6334 19.3784   2
  -3  21   1 1.59909 19.6521   1
   3  21  -1 55.5406 19.5838   2
  -2 -21   1 19.4922 19.3115   4
  -2 -21   1 -10.190 19.9975   1
   2 -21  -1 51.2250 23.3182   1
  -2  21   1 42.6515 16.7812   1
   2  21  -1 30.7078 18.6385   2
  -2  21   1 31.0935 19.2580   2
  -1 -21   1 73.8368 22.2131   1
   1 -21  -1 95.1997 23.8340   1
  -1 -21   1 15.1178 18.9316   4
  -1  21   1 39.4066 20.8233   1
  -1  21   1 74.9076 21.6953   2
   1  21  -1 57.2319 19.6854   2
   0 -21   1 46.4490 21.9714   1
   0 -21  -1 43.4700 21.5098   1
   0 -21   1 19.5275 19.3343   4
   0  21   1 22.3303 19.2108   2
   0  21  -1 75.7703 19.4807   2
   1 -21   1 13.0439 20.7890   1
   1 -21   1 29.8153 18.6391   4
  -1 -21  -1 36.9942 21.3249   1
  -1  21  -1 68.5724 19.5491   2
  -1  21  -1 30.9304 15.4015   1
   1  21   1 32.8473 19.5690   2
  -2 -21  -1 10.1858 20.2352   1
   2 -21   1 25.1880 21.7621   1
   2  21   1 1.55483 17.6572   2
  -2  21  -1 -12.577 17.8273   2
  -2  21  -1 17.8330 19.0986   1
   3 -21   1 34.0511 22.9414   1
  -3  21  -1 -3.1067 17.3126   1
  -3  21  -1 14.6692 18.0816   2
   3  21   1 15.4411 19.5828   2
  -4 -21  -1 -15.777 21.9430   1
  -4 -21  -1 -9.7548 20.0466   4
   4 -21   1 25.7010 24.4731   1
  -4  21  -1 7.46878 19.4532   2
   4  21   1 26.7457 20.2392   2
  -4  21  -1 -0.6495 18.4029   1
   5 -21   1 24.0771 22.6865   4
   5 -21   1 60.3783 27.4939   1
  -5 -21  -1 34.4376 24.3333   4
  -5  21  -1 41.9446 22.6455   1
  -5  21  -1 23.4441 22.8306   2
   5  21   1 51.5356 22.5157   2
   6 -21   1 13.4048 24.5457   4
  -6 -21  -1 -29.463 24.7442   4
   6  21   1 -7.8093 23.5236   2
  -6  21  -1 9.66129 23.8608   2
   5 -22  -1 58.3708 34.7116   1
  -5 -22   1 36.1337 27.2425   4
  -5  22   1 30.5317 23.8707   1
   5  22  -1 22.0795 27.5499   2
  -5  22   1 11.9600 25.2264   2
   4 -22  -1 109.716 31.4059   1
  -4 -22   1 113.346 25.4239   1
  -4 -22   1 94.6431 27.2421   4
   4  22  -1 67.4823 24.8482   2
  -4  22   1 107.595 29.2847   2
  -4  22   1 118.211 24.8494   1
  -3 -22   1 29.1049 22.4227   4
  -3 -22   1 53.0650 22.5341   1
   3 -22  -1 15.8134 26.4011   1
   3  22  -1 53.9865 23.4368   2
  -3  22   1 25.3907 19.9885   1
  -3  22   1 -1.0524 21.7511   2
   2 -22  -1 71.7364 26.2929   1
  -2 -22   1 31.7411 23.3273   4
  -2 -22   1 36.7927 23.3932   1
  -2  22   1 63.9626 23.3674   2
   2  22  -1 46.5595 20.7102   2
  -1 -22   1 -10.358 19.2764   4
   1 -22  -1 2.54974 22.7622   1
  -1 -22   1 18.9904 23.0922   1
   1  22  -1 11.3076 20.2049   2
  -1  22   1 14.8898 20.9131   2
   0 -22   1 -3.2150 20.8433   4
   0 -22   1 54.8125 23.3859   1
   0 -22  -1 21.8133 24.7799   1
   0  22   1 2.54589 20.1979   2
   0  22  -1 8.35905 19.5706   2
   1 -22   1 7.36298 22.6021   4
  -1 -22  -1 37.0113 23.2662   1
   1 -22   1 -14.329 22.6085   1
   1  22   1 -11.029 20.3029   2
  -1  22  -1 2.21560 19.8234   2
   2 -22   1 9.57865 24.3174   1
   2 -22   1 40.2311 22.4780   4
   2  22   1 -4.6823 20.8099   2
  -2  22  -1 -8.3270 20.6993   2
   3 -22   1 4.69589 26.4350   1
   3 -22   1 -14.448 21.2681   4
  -3 -22  -1 18.0497 23.6007   1
  -3 -22  -1 10.6631 23.3166   4
   3  22   1 -24.904 20.9549   2
  -3  22  -1 15.1385 21.0525   1
  -3  22  -1 -1.8024 23.3877   2
  -4 -22  -1 97.9175 29.0352   4
   4 -22   1 142.797 32.2694   1
   4 -22   1 53.9379 27.0454   4
  -4  22  -1 99.5792 24.2342   1
   4  22   1 82.3948 26.6145   2
  -4  22  -1 43.7807 25.6445   2
  -2 -23   1 30.9720 26.5489   1
   2 -23  -1 -1.8949 27.9469   1
  -2 -23   1 -25.374 25.8073   4
  -2  23   1 -37.631 25.7164   2
   2  23  -1 34.5763 30.7410   2
   1 -23  -1 82.1808 29.6190   1
  -1 -23   1 62.4064 27.2780   1
  -1 -23   1 24.7455 27.0920   4
   1  23  -1 -21.669 25.0542   2
  -1  23   1 31.4233 26.4789   2
   0 -23   1 -3.8837 24.9078   4
   0 -23   1 -12.986 26.0110   1
   0 -23  -1 -2.4497 26.6480   1
   0  23  -1 -12.172 25.1315   2
   0  23   1 21.2225 25.3681   2
  -1 -23  -1 21.7104 27.2781   1
   1 -23   1 30.3772 27.1167   1
   1 -23   1 24.0821 27.4358   4
   1  23   1 21.1702 25.9096   2
  -1  23  -1 -32.799 23.3506   2
   2 -23   1 37.5886 29.9063   1
   2 -23   1 26.4862 27.4312   4
  -2 -23  -1 88.9281 28.8137   1
  -2 -23  -1 60.6598 46.3149   4
  -2  23  -1 66.3785 27.7970   2
   2  23   1 46.4310 31.3708   2
 -15   0   2 59.3156 30.2380   3
 -15   0   2 105.598 23.9069   1
 -14   0   2 36.7672 26.5714   1
 -14   0   2 23.1540 21.6102   3
 -13   0   2 534.439 44.2198   3
 -13   0   2 532.353 39.1796   1
 -12   0   2 397.193 37.5630   1
 -12   0   2 441.471 37.5611   3
 -12   0   2 460.847 33.0153   1
 -11   0   2 251.900 25.3649   1
 -11   0   2 191.615 29.8131   3
 -11   0   2 232.015 21.8727   1
 -10   0   2 258.173 24.5269   3
 -10   0   2 211.240 21.7174   1
  10   0  -2 219.083 15.7452   4
 -10   0   2 232.836 19.4174   1
  -9   0   2 49.6600 6.79244   4
  -9   0   2 55.1876 10.4888   1
  -9   0   2 64.0770 13.1068   3
   9   0  -2 40.1180 6.53216   4
  -9   0   2 55.8176 9.26936   1
  -8   0   2 509.452 28.8501   1
   8   0  -2 449.607 25.3569   1
  -8   0   2 487.941 26.2715   4
   8   0  -2 467.566 25.2587   1
   8   0  -2 444.457 26.4729   4
  -8   0   2 445.692 29.4933   1
  -7   0   2 16.6939 3.81374   4
   7   0  -2 21.3590 4.24060   4
   7   0  -2 20.4162 3.62934   1
  -7   0   2 24.2185 5.52175   1
  -7   0   2 13.5138 5.61688   1
   7   0  -2 22.5859 4.86905   1
  -6   0   2 578.789 31.8444   1
   6   0  -2 550.334 30.3659   1
  -6   0   2 544.426 32.4201   1
   6   0  -2 571.812 30.9443   4
  -6   0   2 605.447 30.8414   4
   6   0  -2 532.153 31.1269   1
   5   0  -2 1000.81 50.8364   4
  -5   0   2 1005.67 51.6225   1
   5   0  -2 953.764 50.4020   1
   5   0  -2 911.311 51.1134   1
  -5   0   2 938.616 51.8274   1
  -4   0   2 598.177 32.1986   4
  -4   0   2 585.207 32.4770   1
  -4   0   2 612.899 33.1940   1
   4   0  -2 638.031 32.4356   4
   4   0  -2 617.239 32.1119   1
   4   0  -2 563.885 32.6278   1
  -3   0   2 312.049 16.5549   4
   3   0  -2 304.060 16.5449   4
   3   0  -2 298.221 16.3485   1
   3   0  -2 277.679 16.8770   1
  -3   0   2 286.548 17.0688   1
  -3   0   2 285.752 16.5088   1
   2   0  -2 64.9197 4.87547   1
   2   0  -2 75.5095 5.16840   4
  -2   0   2 63.0605 5.49116   1
   2   0  -2 67.6858 5.45942   1
  -2   0   2 66.8169 5.02424   4
  -2   0   2 70.1702 5.10300   1
   1   0  -2 625.281 32.7372   1
  -1   0   2 618.591 33.1333   3
   1   0  -2 639.513 32.7837   4
  -1   0   2 624.212 32.7914   1
  -1   0   2 588.314 32.9549   1
  -1   0   2 624.540 32.7377   4
   1   0  -2 581.845 32.9943   1
   0   0  -2 1299.71 67.0039   1
   0   0  -2 1319.33 66.5848   4
   0   0   2 1281.84 66.7554   1
   0   0   2 1277.27 66.5528   4
   0   0  -2 1281.03 67.0486   3
   0   0   2 1306.61 67.0541   3
   0   0   2 1293.40 66.9552   1
   1   0   2 286.832 15.5623   4
  -1   0  -2 286.427 16.2921   1
   1   0   2 282.005 16.1822   1
   1   0   2 306.377 16.7637   3
  -1   0  -2 304.286 15.5929   4
  -1   0  -2 287.174 16.6030   3
  -1   0  -2 289.522 16.1216   1
   2   0   2 1970.86 100.274   3
   2   0   2 1934.31 98.9632   1
  -2   0  -2 1943.84 98.1878   4
  -2   0  -2 1952.13 101.307   3
  -2   0  -2 1892.71 99.3282   1
   2   0   2 1956.68 99.2051   1
   2   0   2 1784.02 98.1581   4
  -2   0  -2 1984.06 99.2598   1
  -3   0  -2 127.101 6.67787   4
  -3   0  -2 116.559 8.65773   1
  -3   0  -2 128.371 8.62854   1
   3   0   2 118.938 8.03881   1
   3   0   2 125.180 8.37467   1
   3   0   2 119.682 10.0976   3
  -3   0  -2 134.154 10.0336   3
  -4   0  -2 1168.30 60.4238   1
   4   0   2 1119.88 59.6210   1
   4   0   2 1055.65 62.3195   3
  -4   0  -2 1120.81 60.2883   1
  -4   0  -2 1237.27 62.3053   3
   5   0   2 535.220 29.3581   1
   5   0   2 488.919 32.5497   3
  -5   0  -2 582.614 32.9715   3
  -5   0  -2 574.515 30.7608   1
  -5   0  -2 515.272 30.5587   1
   6   0   2 509.831 27.8765   1
  -6   0  -2 514.893 29.9749   1
  -6   0  -2 514.621 32.2878   3
   7   0   2 399.468 22.1355   1
   7   0   2 395.084 21.9795   1
  -7   0  -2 390.794 26.0077   1
  -7   0  -2 438.761 25.9416   1
  -7   0  -2 440.913 28.9610   3
  -8   0  -2 42.3562 8.39983   1
  -8   0  -2 37.2629 10.5764   3
  -8   0  -2 41.4773 9.25049   1
  -9   0  -2 293.005 24.8909   3
  -9   0  -2 273.316 21.2108   1
  -9   0  -2 231.293 19.6114   2
  -9   0  -2 258.680 23.3506   1
 -10   0  -2 267.088 22.9000   1
 -10   0  -2 273.823 22.2106   2
 -10   0  -2 236.599 25.5277   1
 -11   0  -2 53.4447 15.8830   3
 -11   0  -2 77.9832 14.3609   1
 -11   0  -2 59.1049 13.7003   2
 -11   0  -2 71.3557 21.1943   1
 -12   0  -2 -6.2057 15.8301   3
 -12   0  -2 -12.257 13.8019   1
 -13   0  -2 16.1935 17.3150   1
 -13   0  -2 -11.105 19.9937   3
 -15  -1   2 -50.109 25.0424   3
 -15  -1   2 -4.3917 20.4507   1
 -15   1   2 11.0518 20.9349   1
 -14  -1   2 144.741 24.9509   1
 -14  -1   2 104.988 25.8229   3
 -14   1   2 106.912 25.2997   3
 -14   1   2 130.498 22.2467   1
 -13  -1   2 27.7582 13.2107   1
 -13  -1   2 47.9855 18.9536   3
 -13   1   2 4.58519 17.5482   3
 -13   1   2 50.2549 15.1979   1
 -12  -1   2 308.252 31.0361   3
 -12  -1   2 244.466 30.7451   1
 -12  -1   2 301.077 25.9132   1
 -12   1   2 326.731 31.4528   3
 -12   1   2 254.710 26.3774   1
 -11  -1   2 117.844 17.6376   1
 -11  -1   2 146.382 17.5934   1
 -11  -1   2 129.402 22.4388   3
 -11   1   2 156.516 18.5667   1
 -11   1   2 131.365 20.1024   1
 -10  -1   2 168.859 18.7506   1
 -10  -1   2 165.011 11.6092   4
 -10  -1   2 164.244 21.1809   3
 -10  -1   2 149.137 16.0309   1
  10  -1  -2 146.469 12.3150   4
 -10   1   2 113.357 19.3689   1
 -10   1   2 161.485 21.1350   3
 -10   1   2 150.702 16.9497   1
   9  -1  -2 393.139 27.1857   1
   9  -1  -2 410.515 25.2091   4
  -9  -1   2 467.422 27.8758   1
  -9  -1   2 461.101 32.2460   3
  -9  -1   2 472.414 25.0720   4
   9  -1  -2 458.907 25.1890   1
  -9  -1   2 445.280 29.1176   1
  -9   1   2 441.513 28.5577   1
  -9   1   2 462.568 32.6125   3
   9   1  -2 377.929 25.4234   4
  -9   1   2 432.822 30.1109   1
   8  -1  -2 225.370 15.5436   4
   8  -1  -2 242.644 15.5920   1
  -8  -1   2 265.730 17.4960   1
   8  -1  -2 258.673 16.3357   1
  -8  -1   2 279.179 15.7004   4
   8   1  -2 233.589 15.9005   4
  -8   1   2 255.196 18.5691   1
  -8   1   2 242.648 19.4254   1
  -8   1   2 238.381 15.3673   4
   7  -1  -2 446.651 25.0969   1
   7  -1  -2 421.426 24.1235   4
  -7  -1   2 455.043 25.3135   1
  -7  -1   2 463.674 24.2080   4
   7  -1  -2 426.108 24.2939   1
  -7  -1   2 408.758 25.9337   1
  -7   1   2 447.210 26.2796   1
   7   1  -2 383.054 24.2191   4
  -7   1   2 388.533 26.6428   1
  -7   1   2 413.398 23.9061   4
  -6  -1   2 38.9265 6.01595   1
   6  -1  -2 44.9150 6.54636   1
   6  -1  -2 40.5865 5.85001   1
  -6  -1   2 43.9129 6.11287   1
  -6  -1   2 46.3407 5.49497   4
   6  -1  -2 45.6333 5.41627   4
   6   1  -2 43.2561 3.98960   1
   6   1  -2 50.8347 5.82864   4
  -6   1   2 45.1663 7.20273   1
  -6   1   2 48.7615 5.42531   4
  -6   1   2 38.9710 6.86246   1
   5  -1  -2 145.721 10.8821   1
   5  -1  -2 156.399 9.78310   1
  -5  -1   2 143.754 9.52301   1
   5  -1  -2 154.604 9.43444   4
  -5  -1   2 156.608 10.3752   1
   5   1  -2 111.202 9.26390   4
  -5   1   2 113.273 10.3020   1
  -5   1   2 117.790 10.8868   1
  -4  -1   2 1830.69 98.9646   1
   4  -1  -2 1938.90 99.4106   1
  -4  -1   2 1903.08 99.6305   1
   4  -1  -2 2037.85 99.2765   4
   4  -1  -2 1736.78 103.146   1
  -4  -1   2 1939.00 99.2532   4
   4   1  -2 1915.05 98.9332   1
  -4   1   2 1980.79 99.1898   4
   4   1  -2 1956.05 99.4049   4
  -4   1   2 1936.34 100.405   1
  -4   1   2 1974.88 101.045   1
  -3  -1   2 694.667 35.9290   4
  -3  -1   2 661.835 36.0594   1
  -3  -1   2 690.417 35.6059   1
   3  -1  -2 660.161 36.6874   1
   3  -1  -2 694.050 36.0658   1
   3  -1  -2 703.016 35.8694   4
  -3   1   2 667.442 35.7872   4
   3   1  -2 677.502 35.9907   4
  -3   1   2 648.305 36.6801   1
   3   1  -2 664.551 35.8112   1
  -3   1   2 648.938 36.1558   1
   2  -1  -2 1541.63 80.3767   1
  -2  -1   2 1576.92 79.7883   4
   2  -1  -2 1598.10 79.7285   4
  -2  -1   2 1542.35 79.8559   1
   2  -1  -2 1499.37 79.7542   1
  -2  -1   2 1509.13 79.4529   1
   2   1  -2 1532.77 79.8113   4
  -2   1   2 1557.27 80.3517   1
   2   1  -2 1539.32 79.8148   1
  -2   1   2 1519.67 79.8850   1
   2   1  -2 1498.71 79.3939   1
  -2   1   2 1598.02 79.7627   4
   1  -1  -2 2520.96 134.185   1
  -1  -1   2 2597.92 134.552   3
  -1  -1   2 2619.50 134.372   1
   1  -1  -2 2515.88 134.570   1
  -1  -1   2 2481.77 134.087   1
   1  -1  -2 2650.89 134.197   4
  -1  -1   2 2568.71 134.196   4
  -1   1   2 2633.27 134.223   4
   1   1  -2 2694.56 134.677   3
   1   1  -2 2658.64 134.176   1
   1   1  -2 2736.29 134.342   4
   1   1  -2 2643.48 134.405   1
  -1   1   2 2710.14 134.505   3
  -1   1   2 2595.31 134.276   1
  -1   1   2 2744.04 134.634   1
   0  -1   2 50.1356 3.62225   2
   0  -1   2 55.6626 4.59815   3
   0  -1  -2 65.7098 4.29198   1
   0  -1   2 50.9694 4.48046   1
   0  -1  -2 61.5219 4.46587   3
   0  -1   2 52.7396 4.28611   1
   0  -1  -2 60.2727 4.43898   1
   0  -1  -2 60.3125 4.07469   4
   0  -1   2 54.5667 4.10679   4
   0   1   2 57.2621 4.42602   1
   0   1  -2 58.2855 4.69689   3
   0   1  -2 52.3887 4.05214   4
   0   1  -2 53.8735 4.42721   1
   0   1   2 63.6692 4.45522   3
   0   1   2 55.6338 4.19610   1
   0   1   2 55.0554 4.08277   4
   0   1  -2 50.3910 4.49566   1
   1  -1   2 3750.60 198.353   1
  -1  -1  -2 3696.63 197.772   4
  -1  -1  -2 3835.74 198.026   1
   1  -1   2 3782.58 198.565   1
  -1  -1  -2 3827.10 198.600   3
   1  -1   2 3960.28 198.952   3
   1  -1   2 3838.15 197.748   4
  -1  -1  -2 3676.39 198.168   1
  -1   1  -2 4064.28 198.918   3
   1   1   2 4024.08 198.005   1
  -1   1  -2 3804.06 197.512   2
   1   1   2 4017.67 198.739   3
   1   1   2 3801.15 197.560   2
   1   1   2 3939.54 198.098   1
  -1   1  -2 4054.56 198.716   1
  -1   1  -2 4077.44 198.618   1
  -1   1  -2 3935.50 197.834   4
   2  -1   2 298.336 17.2953   1
   2  -1   2 308.414 15.9917   4
  -2  -1  -2 302.898 16.1289   4
   2  -1   2 292.148 17.0272   1
   2  -1   2 282.306 17.9848   3
  -2  -1  -2 292.697 16.8362   1
  -2  -1  -2 301.384 16.6754   1
  -2  -1  -2 301.586 16.3503   2
  -2   1  -2 328.774 18.2603   3
  -2   1  -2 293.577 16.0393   4
   2   1   2 314.727 18.0047   3
  -2   1  -2 308.539 17.5288   1
  -2   1  -2 309.993 17.4310   1
   2   1   2 311.291 16.4301   1
   2   1   2 303.476 16.5630   1
  -3  -1  -2 398.952 20.8758   2
  -3  -1  -2 385.692 21.0186   1
  -3  -1  -2 390.211 19.9477   4
  -3  -1  -2 376.691 21.1597   1
   3  -1   2 364.009 21.7614   1
  -3  -1  -2 423.158 22.9188   3
   3  -1   2 378.573 22.9438   3
   3   1   2 353.784 22.5967   3
  -3   1  -2 381.196 22.7768   3
  -3   1  -2 360.275 21.7536   1
   3   1   2 382.807 20.3546   1
  -3   1  -2 372.646 21.9080   1
   3   1   2 376.017 20.5030   1
  -4  -1  -2 131.365 9.25328   2
  -4  -1  -2 113.904 7.40325   4
   4  -1   2 135.733 9.95064   1
  -4  -1  -2 120.201 9.53445   1
   4  -1   2 135.021 9.58975   1
  -4  -1  -2 155.531 11.7913   3
   4  -1   2 119.593 17.4910   3
  -4  -1  -2 128.983 9.26549   1
  -4  -1  -2 132.674 7.34389   4
   4   1   2 145.595 8.22543   1
  -4   1  -2 149.886 11.9876   3
  -4   1  -2 140.470 10.5733   1
  -4   1  -2 167.835 10.8990   1
   4   1   2 140.649 11.7752   3
   4   1   2 142.657 8.28176   1
  -5  -1  -2 1800.49 91.7063   1
  -5  -1  -2 1686.23 91.4985   1
   5  -1   2 1693.67 91.4862   1
   5  -1   2 1783.32 91.2140   1
   5  -1   2 1610.48 94.0458   3
  -5  -1  -2 1826.58 94.0064   3
  -5  -1  -2 1757.60 91.4368   2
  -5   1  -2 1856.60 94.2708   3
   5   1   2 1693.22 90.2893   1
  -5   1  -2 1717.91 92.5568   1
   5   1   2 1729.00 89.4885   1
  -5   1  -2 1910.52 92.6676   1
  -6  -1  -2 224.509 15.5268   2
  -6  -1  -2 235.509 18.6737   3
   6  -1   2 241.631 14.9749   1
   6  -1   2 237.875 15.4332   1
  -6  -1  -2 217.376 15.8669   1
  -6  -1  -2 250.400 16.1022   1
  -6   1  -2 247.217 17.0222   1
  -6   1  -2 238.607 17.4011   1
  -6   1  -2 262.853 19.1925   3
   7  -1   2 209.134 13.3052   1
  -7  -1  -2 186.161 18.0257   3
  -7  -1  -2 179.661 15.1770   1
   7  -1   2 197.420 13.7066   1
  -7  -1  -2 204.005 15.0706   2
  -7  -1  -2 212.682 15.5346   1
  -7   1  -2 218.671 18.8376   3
  -7   1  -2 212.979 16.4279   1
  -7   1  -2 191.226 16.8731   1
  -8  -1  -2 405.763 25.8801   1
  -8  -1  -2 382.124 26.5851   1
   8  -1   2 401.819 23.0207   1
  -8  -1  -2 361.606 29.2947   2
  -8  -1  -2 412.764 29.7450   3
  -8   1  -2 418.569 29.8016   3
  -8   1  -2 390.016 27.8685   1
  -8   1  -2 440.552 27.0370   1
   9  -1   2 298.691 18.7853   1
  -9  -1  -2 320.077 23.7043   1
  -9  -1  -2 333.204 23.7935   2
  -9  -1  -2 371.114 28.3105   3
  -9  -1  -2 344.763 25.6851   1
  -9   1  -2 377.435 28.4709   3
  -9   1  -2 307.508 26.8007   1
  -9   1  -2 358.303 25.1057   1
 -10  -1  -2 78.6215 12.2084   2
 -10  -1  -2 53.0574 11.7025   1
 -10  -1  -2 64.8142 13.9420   1
 -10   1  -2 20.5183 14.5399   1
 -10   1  -2 59.5145 12.5646   1
 -10   1  -2 63.0025 16.8311   3
 -11  -1  -2 92.4775 18.5303   3
 -11  -1  -2 109.343 16.0938   2
 -11  -1  -2 115.742 19.1082   1
 -11  -1  -2 77.1059 18.6436   1
 -11   1  -2 76.1197 14.6883   2
 -11   1  -2 116.722 19.2886   1
 -11   1  -2 143.048 22.5063   3
 -12  -1  -2 -2.7471 16.4424   3
 -12  -1  -2 -11.724 12.3936   1
 -12   1  -2 5.35708 15.8404   1
 -12   1  -2 -9.1034 15.6616   3
 -13  -1  -2 -12.329 19.4791   3
 -13   1  -2 2.78058 17.4077   1
 -13   1  -2 25.8526 20.5511   3
 -15  -2   2 70.9093 27.5562   3
 -15   2   2 15.1039 29.3719   3
 -15   2   2 26.5512 21.8576   1
 -14  -2   2 37.6693 16.7262   1
 -14  -2   2 -14.432 19.9001   3
 -14   2   2 -13.314 20.5369   3
 -14   2   2 -6.5337 16.6202   1
 -13  -2   2 231.992 25.5107   1
 -13  -2   2 248.625 31.5621   3
 -13   2   2 228.499 31.8041   3
 -12  -2   2 27.5945 15.8469   3
 -12  -2   2 26.6068 15.5132   1
 -12  -2   2 14.2013 11.0046   1
 -12   2   2 22.3963 15.9528   3
 -12   2   2 33.4992 12.4886   1
 -11  -2   2 363.312 33.2512   3
  11  -2  -2 386.737 22.3286   1
 -11  -2   2 356.710 29.6857   1
 -11  -2   2 362.254 29.6882   2
  11  -2  -2 404.616 23.9060   1
 -11  -2   2 398.441 22.4808   4
  11  -2  -2 332.899 22.5862   4
 -11  -2   2 413.868 27.4871   1
 -11   2   2 419.944 29.8763   1
 -11   2   2 347.856 33.3260   1
 -10  -2   2 73.9256 12.3025   1
 -10  -2   2 70.7401 15.6255   3
  10  -2  -2 73.0345 9.92666   1
 -10  -2   2 70.3096 12.5522   1
 -10  -2   2 100.638 8.83767   4
  10  -2  -2 91.8148 10.0149   1
 -10   2   2 86.4124 15.0304   1
 -10   2   2 94.7574 15.7540   1
 -10   2   2 81.9399 15.5943   3
   9  -2  -2 353.799 21.5068   1
  -9  -2   2 358.524 19.9857   4
  -9  -2   2 289.347 23.0157   1
   9  -2  -2 309.684 20.0196   4
  -9  -2   2 344.685 22.0151   1
   9  -2  -2 329.535 20.8393   1
  -9   2   2 352.956 24.2960   1
  -9   2   2 288.966 25.1702   1
  -9   2   2 339.208 27.1787   3
  -8  -2   2 394.463 21.1722   4
  -8  -2   2 392.716 22.2649   1
   8  -2  -2 356.007 20.9742   4
   8  -2  -2 383.005 22.8525   1
  -8  -2   2 334.669 23.0618   1
   8  -2  -2 362.324 21.8965   1
   8   2  -2 297.512 21.2712   4
  -8   2   2 364.657 23.9967   1
  -8   2   2 321.133 25.1031   1
   7  -2  -2 63.8859 7.79160   1
  -7  -2   2 50.6789 7.13439   1
   7  -2  -2 58.0417 8.61300   1
  -7  -2   2 49.0363 7.29580   1
  -7  -2   2 66.1073 6.58535   4
   7  -2  -2 45.2365 6.25096   4
   7   2  -2 42.4631 5.99852   4
  -7   2   2 48.8919 9.31070   1
  -7   2   2 53.9932 8.49019   1
  -6  -2   2 501.917 31.3518   1
  -6  -2   2 633.820 30.7614   4
   6  -2  -2 562.581 31.1879   1
   6  -2  -2 585.625 32.4094   1
   6  -2  -2 593.033 30.4456   4
  -6  -2   2 544.178 31.0278   1
   6   2  -2 467.549 30.4211   4
  -6   2   2 574.729 32.2645   1
  -6   2   2 521.246 30.1447   4
   5  -2  -2 493.957 28.5513   1
  -5  -2   2 496.086 28.1943   1
   5  -2  -2 516.976 27.9345   4
   5  -2  -2 519.726 29.6925   1
  -5  -2   2 547.944 28.2202   4
  -5  -2   2 474.197 27.4286   1
   5   2  -2 502.491 28.3245   4
  -5   2   2 545.774 29.5149   1
  -5   2   2 508.468 29.9844   1
  -5   2   2 495.278 28.6818   4
   4  -2  -2 30.9316 4.55116   1
   4  -2  -2 31.5597 3.91617   4
  -4  -2   2 27.6905 4.07960   1
  -4  -2   2 28.3870 3.33462   1
   4  -2  -2 23.8393 5.42898   1
  -4   2   2 24.0290 3.61508   4
   4   2  -2 29.6983 4.53434   4
  -4   2   2 32.2371 5.34386   1
  -4   2   2 31.4463 5.14048   1
   3  -2  -2 786.185 42.1958   1
  -3  -2   2 773.202 41.8828   4
  -3  -2   2 814.490 41.7270   1
   3  -2  -2 819.031 41.8202   4
  -3   2   2 808.220 43.0172   1
   3   2  -2 792.844 40.9133   1
   3   2  -2 787.466 41.1786   1
  -3   2   2 763.784 41.7347   4
   3   2  -2 781.684 42.0360   4
  -2  -2   2 3413.01 170.198   4
   2  -2  -2 3485.80 170.085   4
  -2  -2   2 3368.16 169.919   1
  -2  -2   2 3250.35 169.585   1
   2  -2  -2 3498.32 170.355   1
  -2  -2   2 3631.24 170.585   2
   2  -2  -2 3515.21 171.076   1
   2   2  -2 3113.67 169.474   1
   2   2  -2 3205.01 170.189   4
  -2   2   2 3114.95 169.957   4
  -2   2   2 3160.13 170.284   1
   2   2  -2 3179.34 169.738   1
  -2   2   2 3311.15 170.775   1
   1  -2  -2 1324.57 69.1119   1
  -1  -2   2 1371.98 68.7177   1
  -1  -2   2 1296.09 68.4571   1
   1  -2  -2 1352.64 68.7167   1
  -1  -2   2 1380.22 68.9009   3
  -1  -2   2 1343.49 68.6721   2
   1  -2  -2 1312.20 68.5602   4
  -1  -2   2 1291.79 68.6339   4
  -1   2   2 1336.43 68.7429   1
   1   2  -2 1316.66 68.5688   2
  -1   2   2 1374.02 69.0700   1
   1   2  -2 1321.56 68.9040   3
   1   2  -2 1310.34 68.4938   1
  -1   2   2 1312.27 68.5651   3
  -1   2   2 1265.32 68.5673   4
   1   2  -2 1331.76 68.7773   4
   1   2  -2 1304.60 68.6178   1
   0  -2   2 1038.06 58.3534   1
   0  -2   2 1073.75 58.5617   1
   0  -2  -2 1082.39 58.1476   3
   0  -2   2 1064.45 57.9255   2
   0  -2  -2 1099.84 58.3874   1
   0  -2   2 1084.94 58.4911   3
   0  -2  -2 1088.07 58.1152   1
   0  -2   2 1040.82 58.1429   4
   0  -2  -2 1053.09 58.1143   4
   0   2  -2 1162.28 58.3377   4
   0   2  -2 1200.12 58.6578   1
   0   2  -2 1201.52 58.7179   1
   0   2   2 1163.13 58.1952   1
   0   2  -2 1150.59 57.9832   2
   0   2   2 1215.74 58.3393   1
   0   2   2 1202.13 58.2282   3
   0   2  -2 1175.68 58.6470   3
  -1  -2  -2 479.902 25.5620   2
  -1  -2  -2 509.454 25.6355   1
  -1  -2  -2 489.678 26.1695   3
   1  -2   2 496.660 26.5731   1
   1  -2   2 515.001 26.7669   3
  -1  -2  -2 498.249 25.8011   1
   1  -2   2 484.544 26.3990   1
   1  -2   2 476.199 25.6288   4
  -1   2  -2 470.797 26.4803   1
  -1   2  -2 484.896 26.5610   1
   1   2   2 484.737 25.5071   1
  -1   2  -2 438.499 25.6109   4
  -1   2  -2 474.081 25.3350   2
   1   2   2 484.913 26.2166   3
  -1   2  -2 462.892 26.5786   3
   1   2   2 482.246 25.6650   2
   1   2   2 474.563 25.4472   1
   2  -2   2 1155.16 61.0497   3
   2  -2   2 1196.88 60.6214   1
   2  -2   2 1175.93 59.1574   4
  -2  -2  -2 1067.12 61.4060   3
  -2  -2  -2 1202.31 59.3330   1
   2  -2   2 1162.28 61.4588   1
  -2  -2  -2 1172.10 59.5799   2
  -2  -2  -2 1196.70 59.5301   1
  -2   2  -2 1208.95 61.0051   3
   2   2   2 1107.61 58.7838   1
   2   2   2 1114.87 59.5166   2
   2   2   2 1092.26 60.5452   3
   2   2   2 1100.73 58.8141   1
  -2   2  -2 1182.85 60.9707   1
  -2   2  -2 1095.34 60.5911   1
   3  -2   2 324.002 20.2639   1
   3  -2   2 347.742 18.3431   4
  -3  -2  -2 348.514 19.5375   2
  -3  -2  -2 336.461 18.9462   1
  -3  -2  -2 370.990 21.0041   3
   3  -2   2 320.196 21.2414   3
   3  -2   2 376.288 20.4162   1
  -3  -2  -2 332.245 19.1727   1
  -3   2  -2 351.274 20.7109   1
  -3   2  -2 340.204 20.5725   1
  -3   2  -2 386.853 21.5159   3
   3   2   2 345.398 21.1394   3
  -4  -2  -2 2378.55 129.155   1
   4  -2   2 2488.33 130.352   1
   4  -2   2 2224.04 133.468   3
  -4  -2  -2 2509.35 129.070   1
   4  -2   2 2629.27 130.125   1
  -4  -2  -2 2656.06 131.495   3
  -4  -2  -2 2510.75 129.671   2
  -4   2  -2 2468.08 130.876   1
  -4   2  -2 2686.40 131.155   1
  -4   2  -2 2699.03 131.918   3
   4   2   2 2404.77 131.486   3
   5  -2   2 221.595 15.4435   1
   5  -2   2 235.194 18.1008   3
  -5  -2  -2 233.245 17.1587   3
  -5  -2  -2 233.576 14.9670   2
  -5  -2  -2 232.099 14.2326   1
   5  -2   2 243.376 15.2387   1
  -5  -2  -2 220.288 12.7157   4
  -5   2  -2 207.851 18.0610   1
  -5   2  -2 243.945 16.4348   1
  -5   2  -2 246.914 17.6982   3
  -6  -2  -2 721.634 37.3527   4
  -6  -2  -2 687.281 37.3160   4
  -6  -2  -2 687.115 39.8836   1
   6  -2   2 754.364 40.1675   1
  -6  -2  -2 731.508 40.5415   2
   6  -2   2 728.866 40.6765   1
  -6  -2  -2 738.629 43.0188   3
  -6  -2  -2 730.980 40.0908   1
  -6   2  -2 762.036 41.7049   1
  -6   2  -2 796.259 43.7601   3
  -6   2  -2 704.135 42.1327   1
   7  -2   2 366.835 20.4749   1
  -7  -2  -2 295.065 22.1003   1
   7  -2   2 319.884 20.9365   1
  -7  -2  -2 330.848 24.4040   3
  -7  -2  -2 348.492 20.9374   1
  -7   2  -2 336.027 22.6140   1
  -7   2  -2 298.419 23.0930   1
  -7   2  -2 317.128 24.6436   3
   8  -2   2 9.06957 4.86589   1
  -8  -2  -2 24.9384 9.27727   3
  -8  -2  -2 17.3379 6.59977   1
  -8  -2  -2 5.96178 6.74137   2
  -8  -2  -2 2.77888 6.75047   1
   8  -2   2 14.3908 5.92136   1
  -8   2  -2 23.3109 9.58590   3
  -8   2  -2 20.0814 9.80827   1
  -8   2  -2 18.4654 8.21988   1
  -9  -2  -2 458.920 28.8670   1
  -9  -2  -2 506.103 33.7480   3
  -9  -2  -2 421.626 29.2715   2
   9  -2   2 416.874 26.2510   1
  -9  -2  -2 401.691 29.7029   1
  -9   2  -2 509.006 31.4213   1
  -9   2  -2 533.053 34.5954   3
  -9   2  -2 383.936 32.2951   1
 -10  -2  -2 31.6607 9.74562   1
 -10  -2  -2 1.99853 10.4412   2
 -10  -2  -2 18.7761 11.6434   1
  10  -2   2 23.5359 5.07650   1
 -10   2  -2 25.1175 13.4701   3
 -10   2  -2 32.5596 11.7208   1
 -10   2  -2 23.0034 15.7139   1
 -11  -2  -2 39.4259 16.5046   1
 -11  -2  -2 58.3566 15.5547   3
 -11  -2  -2 42.7064 12.7872   1
 -11  -2  -2 37.2463 14.2337   2
 -11   2  -2 43.8339 15.4613   3
 -11   2  -2 35.7012 13.5677   1
 -12  -2  -2 59.3602 18.6689   3
 -12  -2  -2 41.3802 14.2844   1
 -12   2  -2 38.0337 19.1485   1
 -12   2  -2 55.7364 18.3559   3
 -13  -2  -2 17.7683 20.6628   3
 -13  -2  -2 -9.7625 16.3129   1
 -13   2  -2 0.67581 20.3424   3
 -13   2  -2 -13.365 17.1952   1
 -15  -3   2 43.4033 27.8596   3
 -15   3   2 47.0900 30.4257   3
 -14  -3   2 79.4588 17.4335   1
 -14  -3   2 27.4601 21.5195   3
 -14   3   2 55.4340 19.7134   1
 -14   3   2 12.2614 21.8274   3
 -13  -3   2 60.5349 14.9317   1
 -13  -3   2 30.6003 18.5243   3
 -13   3   2 43.3736 18.6799   3
 -13   3   2 27.2282 16.0590   1
 -12  -3   2 226.316 28.3068   1
  12  -3  -2 271.411 18.2206   1
 -12  -3   2 298.000 30.3909   3
 -12  -3   2 262.937 17.4307   4
  12  -3  -2 245.815 18.1925   1
 -12  -3   2 265.734 24.0948   1
 -12   3   2 325.301 27.9535   1
 -12   3   2 301.737 30.6470   3
  11  -3  -2 108.574 13.7409   1
 -11  -3   2 124.632 15.4968   1
 -11  -3   2 127.167 10.8437   4
  11  -3  -2 96.2161 11.1750   4
 -11  -3   2 90.1372 19.4346   3
 -11  -3   2 152.128 19.1260   1
  11  -3  -2 138.984 13.8819   1
 -11   3   2 116.431 20.2874   1
 -10  -3   2 520.936 28.0990   4
  10  -3  -2 508.915 30.2487   1
 -10  -3   2 528.276 36.6384   3
 -10  -3   2 466.806 31.7145   1
  10  -3  -2 471.706 27.9383   4
 -10  -3   2 510.536 30.5144   1
 -10  -3   2 498.466 34.1629   2
 -10   3   2 415.240 34.9555   1
 -10   3   2 491.926 33.4562   1
 -10   3   2 429.439 35.2333   3
   9  -3  -2 388.278 25.4945   1
  -9  -3   2 408.246 23.1325   4
  -9  -3   2 369.681 27.8385   2
   9  -3  -2 356.518 22.8889   4
  -9  -3   2 417.837 24.4600   1
  -9   3   2 434.261 28.0137   1
  -9   3   2 385.491 29.8118   3
  -9   3   2 354.395 28.8245   1
  -8  -3   2 321.835 19.8876   1
   8  -3  -2 313.937 19.1982   4
  -8  -3   2 348.922 19.5460   4
  -8  -3   2 314.581 22.6499   2
  -8  -3   2 300.250 20.6815   1
   8  -3  -2 297.838 21.8056   1
  -8   3   2 320.504 25.1213   3
  -8   3   2 318.926 23.6793   1
  -8   3   2 323.439 23.0160   1
   7  -3  -2 1076.95 58.1973   1
  -7  -3   2 1172.29 57.2903   4
   7  -3  -2 1114.01 56.8736   4
  -7  -3   2 1038.59 57.4607   1
   7  -3  -2 1114.88 59.2017   1
   7   3  -2 923.815 57.0854   4
  -7   3   2 1003.75 59.9157   1
  -7   3   2 1131.79 59.6504   1
  -6  -3   2 209.339 13.0994   1
   6  -3  -2 226.456 15.3191   1
   6  -3  -2 227.638 13.7812   4
  -6  -3   2 219.035 14.0419   1
  -6  -3   2 245.630 14.3247   4
   6  -3  -2 233.132 16.5298   1
  -6   3   2 214.862 15.8902   1
   6   3  -2 190.354 14.1828   4
  -6   3   2 209.864 16.9226   1
  -5  -3   2 459.829 23.6360   4
   5  -3  -2 434.099 25.7484   1
   5  -3  -2 436.018 23.1441   4
   5  -3  -2 406.960 24.0983   1
  -5  -3   2 401.312 22.1362   1
  -5  -3   2 405.629 22.8320   1
  -5  -3   2 412.904 25.2188   2
  -5   3   2 371.199 24.3608   1
  -5   3   2 355.893 24.8247   1
   4  -3  -2 383.171 21.8689   4
   4  -3  -2 396.230 22.8557   1
   4  -3  -2 398.166 23.9364   1
  -4  -3   2 375.915 21.4389   1
  -4  -3   2 398.993 22.2737   4
  -4  -3   2 403.880 23.3511   2
  -4   3   2 381.396 23.6398   1
  -4   3   2 439.611 23.5683   1
   4   3  -2 345.518 22.1216   4
  -3  -3   2 349.937 19.3871   1
  -3  -3   2 349.625 21.0873   4
   3  -3  -2 358.489 20.4796   1
  -3  -3   2 359.949 20.8350   2
  -3  -3   2 344.944 19.0185   1
   3  -3  -2 372.688 21.5834   1
   3  -3  -2 333.544 19.7543   4
  -3   3   2 342.765 21.1191   1
  -3   3   2 390.193 20.9960   1
   3   3  -2 337.935 20.1372   4
  -2  -3   2 2518.86 115.686   2
  -2  -3   2 2145.28 115.245   4
   2  -3  -2 2338.00 114.889   4
  -2  -3   2 2187.04 114.273   1
  -2  -3   2 2344.01 114.539   1
   2  -3  -2 2326.04 115.243   1
   2  -3  -2 2141.28 116.962   1
   2   3  -2 2111.30 114.993   4
   2   3  -2 2223.47 114.280   1
  -2   3   2 2101.04 116.219   1
   2   3  -2 2230.01 114.190   1
  -2   3   2 2252.67 115.697   1
   2   3  -2 2082.12 116.099   2
  -1  -3   2 4119.21 196.860   2
  -1  -3   2 4043.45 196.592   1
  -1  -3   2 4042.93 196.641   3
  -1  -3   2 3801.32 196.661   4
   1  -3  -2 4066.50 197.235   1
  -1  -3   2 3794.73 196.377   1
   1  -3  -2 3968.08 196.663   1
   1   3  -2 3779.60 196.409   1
   1   3  -2 3736.05 196.580   2
  -1   3   2 3902.64 196.954   1
   1   3  -2 3471.79 196.553   4
   1   3  -2 3726.29 196.603   3
   1   3  -2 3751.67 196.379   1
  -1   3   2 3647.04 196.587   1
   0  -3   2 502.062 27.5422   1
   0  -3  -2 511.673 26.8298   3
   0  -3  -2 501.739 27.0504   1
   0  -3  -2 510.537 27.3736   1
   0  -3   2 507.008 27.5986   1
   0  -3   2 466.116 27.1929   4
   0  -3   2 513.163 27.3699   3
   0  -3   2 512.022 27.1366   2
   0   3  -2 497.834 27.1219   2
   0   3   2 530.757 27.1365   1
   0   3   2 506.351 27.0440   1
   0   3   2 516.266 26.7748   3
   0   3  -2 441.290 27.1312   4
   0   3  -2 528.797 28.0094   1
   0   3  -2 528.187 27.4862   3
   0   3  -2 503.528 27.6284   1
  -1  -3  -2 787.298 41.5646   1
  -1  -3  -2 773.448 41.6951   1
   1  -3   2 785.856 42.7068   1
   1  -3   2 731.497 43.4832   1
   1  -3   2 700.929 41.7745   4
   1  -3   2 785.076 42.5726   3
  -1  -3  -2 757.585 41.8511   2
  -1  -3  -2 760.144 41.8506   3
  -1   3  -2 849.952 42.6956   3
   1   3   2 860.221 41.3297   1
  -1   3  -2 843.611 42.9842   1
   1   3   2 838.897 42.1402   2
   1   3   2 853.884 41.3531   1
   1   3   2 841.446 42.0850   3
   2  -3   2 46.2146 5.68731   3
  -2  -3  -2 48.0999 4.55271   2
  -2  -3  -2 47.5940 4.84613   3
  -2  -3  -2 47.0119 3.74228   1
   2  -3   2 42.0797 4.09022   4
  -2  -3  -2 43.3847 3.87485   1
   2  -3   2 52.4095 5.61210   1
   2  -3   2 48.0811 5.80353   1
   2   3   2 47.3958 4.70912   2
  -2   3  -2 59.4118 5.99497   1
  -2   3  -2 47.1019 5.71644   1
  -2   3  -2 51.1315 5.85931   3
   2   3   2 48.6334 5.09603   3
  -3  -3  -2 4452.09 228.452   1
   3  -3   2 4548.72 230.519   1
   3  -3   2 4771.30 230.450   1
   3  -3   2 4472.79 231.217   3
   3  -3   2 4072.79 228.471   4
  -3  -3  -2 4333.23 228.611   1
  -3  -3  -2 4858.53 230.602   3
  -3  -3  -2 4579.40 229.602   2
   3   3   2 4339.49 230.555   3
  -3   3  -2 4377.24 230.790   1
  -3   3  -2 4696.90 231.046   3
  -3   3  -2 4638.44 230.656   1
   3   3   2 4230.60 229.342   2
   4  -3   2 248.659 16.5968   1
  -4  -3  -2 251.009 15.6175   2
   4  -3   2 256.685 16.3084   1
  -4  -3  -2 239.450 14.0874   1
  -4  -3  -2 265.923 16.9898   3
   4  -3   2 247.113 17.8477   3
   4  -3   2 230.790 13.6175   4
  -4  -3  -2 245.154 14.3752   1
  -4   3  -2 253.435 18.4094   1
  -4   3  -2 270.128 17.1075   1
  -4   3  -2 269.384 17.6773   3
   4   3   2 234.375 17.0084   3
   5  -3   2 1315.47 66.4031   1
  -5  -3  -2 1237.77 64.5572   1
  -5  -3  -2 1158.07 64.6232   1
   5  -3   2 1156.60 68.2260   3
   5  -3   2 1247.58 63.1449   4
  -5  -3  -2 1089.46 64.1441   4
  -5  -3  -2 1315.95 67.7821   3
  -5  -3  -2 1266.06 66.0394   2
   5  -3   2 1234.19 66.5924   1
  -5   3  -2 1212.03 67.5380   1
  -5   3  -2 1359.37 68.5126   3
  -5   3  -2 1284.59 67.1381   1
   6  -3   2 1529.23 86.2834   1
  -6  -3  -2 1571.15 84.3270   1
   6  -3   2 1722.04 86.0689   1
  -6  -3  -2 1641.51 86.5391   1
  -6  -3  -2 1692.68 87.9571   3
  -6  -3  -2 1651.06 85.8220   2
  -6  -3  -2 1530.56 83.1986   4
  -6   3  -2 1638.95 88.2629   3
  -6   3  -2 1679.09 87.0706   1
  -6   3  -2 1529.49 87.2862   1
  -7  -3  -2 175.454 12.8987   1
  -7  -3  -2 170.111 9.58143   4
   7  -3   2 190.827 13.8653   1
  -7  -3  -2 169.048 14.2693   2
  -7  -3  -2 174.147 16.8711   3
  -7  -3  -2 165.570 12.6139   1
  -7   3  -2 138.245 15.3825   1
  -7   3  -2 121.534 16.1755   1
  -7   3  -2 198.847 17.7189   3
  -8  -3  -2 77.2469 11.7865   2
  -8  -3  -2 61.1317 9.25589   1
   8  -3   2 92.5242 10.4854   1
  -8  -3  -2 73.4468 13.0044   3
  -8  -3  -2 68.9581 9.93987   1
  -8   3  -2 83.8719 12.5478   1
  -8   3  -2 113.459 15.9852   3
  -8   3  -2 92.9409 14.2947   1
  -9  -3  -2 -4.4084 9.57192   3
  -9  -3  -2 -18.781 8.42708   2
   9  -3   2 -0.5484 9.51489   1
   9  -3   2 7.09921 6.00676   1
  -9  -3  -2 -1.0781 6.73799   1
  -9  -3  -2 4.80409 7.82094   1
  -9   3  -2 -1.1290 9.24971   3
  -9   3  -2 14.5359 12.4832   1
 -10  -3  -2 153.520 16.6898   1
 -10  -3  -2 120.413 16.6878   2
 -10  -3  -2 156.443 19.6738   1
  10  -3   2 136.297 14.5433   1
 -10   3  -2 181.883 19.9332   1
 -10   3  -2 143.886 22.0210   3
 -11  -3  -2 77.4755 15.7594   1
 -11  -3  -2 42.2977 12.2409   1
 -11  -3  -2 74.0079 15.8215   2
  11  -3   2 63.8721 9.49386   1
 -11  -3  -2 70.8926 16.9460   3
 -11   3  -2 38.7657 16.7078   3
 -11   3  -2 74.6429 14.6457   1
 -12  -3  -2 35.0599 13.8218   1
 -12  -3  -2 4.66351 16.9083   3
 -12   3  -2 44.2623 16.4352   1
 -12   3  -2 19.6490 18.3916   3
 -13  -3  -2 60.9573 22.9054   3
 -13  -3  -2 83.7447 23.8925   1
 -13   3  -2 98.5341 20.6147   1
 -13   3  -2 62.6710 22.9738   3
 -15  -4   2 -4.5667 26.8521   3
 -15   4   2 57.8899 23.6447   1
 -15   4   2 5.09778 31.4834   3
 -14  -4   2 -21.066 20.3259   3
 -14  -4   2 26.4000 16.7889   1
 -14   4   2 -16.834 17.6828   1
 -14   4   2 1.75074 20.1990   3
 -13  -4   2 73.5395 15.2501   1
 -13  -4   2 93.4677 21.4378   3
 -13   4   2 103.495 21.7071   3
 -13   4   2 99.6214 19.7234   1
 -12  -4   2 24.9950 14.0333   1
  12  -4  -2 -2.3880 8.77192   1
 -12  -4   2 -11.603 10.7949   1
  12  -4  -2 3.48448 6.00628   4
 -12  -4   2 5.07189 5.68829   4
 -12  -4   2 33.6232 16.6126   3
 -12   4   2 22.8661 15.3221   3
 -12   4   2 5.22333 15.0387   1
 -11  -4   2 492.756 34.6173   1
 -11  -4   2 535.631 32.6988   1
 -11  -4   2 567.398 39.8622   3
  11  -4  -2 465.537 29.4034   4
 -11  -4   2 537.047 29.9474   4
  11  -4  -2 514.758 32.4210   1
  11  -4  -2 536.820 32.8116   1
 -11   4   2 441.589 41.3229   3
 -11   4   2 537.625 36.9992   1
 -10  -4   2 166.036 19.9904   2
 -10  -4   2 186.197 15.4466   1
 -10  -4   2 166.896 17.2394   1
 -10  -4   2 227.171 23.5122   3
  10  -4  -2 159.215 13.4267   4
 -10  -4   2 175.462 13.8176   4
  10  -4  -2 171.306 17.3999   1
  10  -4  -2 166.315 16.7704   1
 -10   4   2 157.393 23.9929   1
 -10   4   2 201.936 22.2838   3
 -10   4   2 224.202 21.1656   1
   9  -4  -2 427.186 27.8630   1
  -9  -4   2 440.074 24.9851   1
  -9  -4   2 395.936 29.3904   2
  -9  -4   2 406.299 26.0108   1
   9  -4  -2 391.686 26.6685   1
   9  -4  -2 410.295 24.1520   4
  -9  -4   2 446.923 24.7914   4
  -9   4   2 408.321 29.1115   1
  -9   4   2 350.802 30.3668   1
  -9   4   2 400.027 30.7305   3
   8  -4  -2 859.658 44.7311   4
  -8  -4   2 802.326 48.0711   2
   8  -4  -2 815.033 46.6483   1
  -8  -4   2 858.873 45.1510   4
  -8  -4   2 764.074 45.1855   1
   8  -4  -2 858.586 47.8666   1
  -8  -4   2 849.436 44.6126   1
  -8   4   2 857.205 48.6311   1
  -8   4   2 797.707 49.8248   3
  -8   4   2 763.975 49.3193   1
  -7  -4   2 159.111 11.1376   4
  -7  -4   2 131.470 10.4157   1
  -7  -4   2 132.322 13.6678   2
   7  -4  -2 120.519 12.4109   1
  -7  -4   2 132.055 9.41671   1
   7  -4  -2 145.628 10.4692   4
   7  -4  -2 129.422 14.2724   1
  -7   4   2 127.241 13.2200   1
  -7   4   2 119.567 15.2170   1
  -6  -4   2 1429.67 77.0635   1
  -6  -4   2 1431.96 76.4006   1
   6  -4  -2 1535.97 80.2093   1
  -6  -4   2 1448.68 82.0945   2
  -6  -4   2 1517.24 77.9997   4
   6  -4  -2 1525.04 77.5788   4
  -6   4   2 1386.03 81.7684   1
  -6   4   2 1566.75 79.9724   1
  -5  -4   2 58.1038 9.73522   2
   5  -4  -2 76.2416 9.61395   1
  -5  -4   2 61.6065 5.94793   1
   5  -4  -2 74.0049 6.92137   4
   5  -4  -2 80.6747 8.59995   1
  -5  -4   2 89.2510 7.42218   4
  -5   4   2 78.5236 11.7954   1
  -5   4   2 91.1849 9.14330   1
   5   4  -2 58.6977 7.12111   4
  -4  -4   2 26.0953 3.56365   1
  -4  -4   2 29.3686 4.98251   4
  -4  -4   2 19.2455 5.11432   2
  -4  -4   2 29.4029 3.05388   1
   4  -4  -2 25.9723 4.16295   4
   4  -4  -2 32.1504 6.57104   1
   4  -4  -2 25.1388 4.87751   1
  -4   4   2 31.2497 5.80378   1
   4   4  -2 21.2879 4.24355   4
  -4   4   2 28.5637 5.91396   1
   3  -4  -2 324.544 19.6006   1
  -3  -4   2 311.098 17.8784   1
  -3  -4   2 327.417 19.3599   4
  -3  -4   2 337.465 18.1723   1
  -3  -4   2 347.184 20.1138   2
   3  -4  -2 355.050 20.9215   1
   3  -4  -2 331.842 18.8724   4
   3   4  -2 287.183 19.0656   4
  -3   4   2 317.372 20.3288   1
  -3   4   2 350.101 20.1014   1
   2  -4  -2 210.765 14.6190   1
  -2  -4   2 183.541 12.4389   1
  -2  -4   2 194.777 13.6224   2
  -2  -4   2 200.599 12.5857   1
  -2  -4   2 205.485 13.4728   4
   2  -4  -2 181.422 13.2571   1
   2   4  -2 238.409 12.5397   1
   2   4  -2 240.973 12.4798   1
  -2   4   2 252.635 14.1035   1
   2   4  -2 209.445 13.4285   4
  -2   4   2 239.964 14.3687   1
   2   4  -2 249.595 13.9828   2
  -1  -4   2 185.928 11.1804   1
  -1  -4   2 176.542 10.9315   3
   1  -4  -2 172.766 11.9268   1
   1  -4  -2 184.244 11.4137   1
  -1  -4   2 172.045 10.9971   1
  -1  -4   2 167.949 12.2772   4
  -1  -4   2 180.448 11.5123   2
   1   4  -2 165.827 11.4815   2
  -1   4   2 188.452 11.7479   1
   1   4  -2 179.694 10.9186   1
  -1   4   2 181.484 11.4278   1
   1   4  -2 177.111 11.1117   3
   1   4  -2 192.375 11.2635   1
   0  -4  -2 122.078 8.26520   3
   0  -4   2 121.703 8.98848   2
   0  -4   2 120.357 9.29343   1
   0  -4   2 120.646 8.87501   3
   0  -4  -2 115.359 9.16074   1
   0  -4  -2 123.375 8.86039   1
   0   4  -2 161.610 9.43697   3
   0   4   2 156.327 9.54413   2
   0   4  -2 157.216 9.52870   2
   0   4  -2 157.168 9.88811   1
   0   4  -2 142.560 10.3889   1
   0   4   2 164.988 9.25183   1
   0   4   2 162.817 8.41494   3
   0   4   2 157.920 9.02414   1
  -1  -4  -2 82.2001 5.81396   3
  -1  -4  -2 81.7306 6.37732   2
   1  -4   2 78.1745 6.39796   4
   1  -4   2 82.4698 6.64636   3
   1  -4   2 81.3528 7.21486   1
   1  -4   2 92.7128 7.47867   1
  -1  -4  -2 85.5797 6.04092   1
  -1  -4  -2 87.2775 5.79441   1
  -1   4  -2 80.8578 6.19570   2
   1   4   2 81.9458 5.85825   3
   1   4   2 85.6320 6.54416   2
   1   4   2 83.7140 5.16601   1
  -1   4  -2 80.8415 7.34099   1
   1   4   2 80.5353 5.18543   1
  -1   4  -2 83.7371 7.31992   1
  -1   4  -2 67.1069 7.22503   3
   2  -4   2 4055.62 205.771   1
   2  -4   2 4268.74 205.875   1
  -2  -4  -2 3837.88 204.614   3
  -2  -4  -2 3854.90 203.681   1
  -2  -4  -2 3960.89 203.802   1
  -2  -4  -2 3993.68 204.837   2
   2  -4   2 3599.45 204.290   4
   2  -4   2 4095.05 205.788   3
   2   4   2 3672.41 205.854   2
   2   4   2 3936.34 204.912   3
  -2   4  -2 4083.53 206.132   1
  -2   4  -2 4395.03 205.839   3
  -2   4  -2 4265.46 205.888   1
  -3  -4  -2 705.712 36.8929   1
  -3  -4  -2 740.758 38.9648   3
   3  -4   2 684.117 39.8431   3
  -3  -4  -2 674.447 36.9831   1
  -3  -4  -2 712.768 38.5739   2
   3  -4   2 679.794 39.3548   1
   3  -4   2 766.935 39.6163   1
   3  -4   2 628.115 37.4725   4
   3   4   2 752.369 38.7644   2
  -3   4  -2 774.890 39.8869   1
   3   4   2 655.904 38.9242   3
  -3   4  -2 748.650 39.7698   3
  -3   4  -2 698.100 40.0107   1
  -4  -4  -2 831.450 43.1738   3
   4  -4   2 699.128 40.5392   4
  -4  -4  -2 796.357 42.3206   2
   4  -4   2 830.861 43.3018   1
   4  -4   2 780.018 43.4138   1
  -4  -4  -2 760.404 40.4513   1
   4  -4   2 752.482 44.0761   3
  -4  -4  -2 794.896 40.2703   1
  -4   4  -2 750.993 43.2409   1
  -4   4  -2 808.206 43.8486   3
  -4   4  -2 693.699 43.4375   1
   5  -4   2 132.936 11.3786   1
  -5  -4  -2 122.409 7.93341   1
   5  -4   2 108.589 7.59563   4
  -5  -4  -2 116.334 10.6797   2
   5  -4   2 137.646 13.3867   1
  -5  -4  -2 140.728 12.6801   3
  -5  -4  -2 115.801 8.23687   1
   5  -4   2 117.538 13.1068   3
  -5   4  -2 122.794 12.6108   3
  -5   4  -2 121.938 11.6455   1
  -5   4  -2 105.593 12.7554   1
   6  -4   2 91.1287 11.4778   1
   6  -4   2 95.6583 5.67878   4
   6  -4   2 100.621 11.0715   1
  -6  -4  -2 101.132 12.1946   3
  -6  -4  -2 94.9927 7.59006   1
   6  -4   2 94.3315 5.63266   4
  -6  -4  -2 82.2060 7.70649   4
  -6  -4  -2 96.8644 7.96382   1
  -6   4  -2 101.136 12.7460   3
  -6   4  -2 89.2474 12.9841   1
  -6   4  -2 86.0142 11.7497   1
  -7  -4  -2 505.459 29.3658   1
  -7  -4  -2 494.728 28.1940   4
  -7  -4  -2 544.235 31.9407   2
  -7  -4  -2 543.434 29.7002   1
   7  -4   2 539.872 31.6469   1
   7  -4   2 508.566 32.1798   1
  -7  -4  -2 562.484 34.0582   3
  -7   4  -2 516.627 33.0526   1
  -7   4  -2 542.458 34.5931   3
  -7   4  -2 462.368 33.4513   1
   8  -4   2 57.5635 9.14659   1
  -8  -4  -2 81.3368 12.6714   2
   8  -4   2 57.8415 10.4504   1
  -8  -4  -2 85.8826 9.36636   1
  -8  -4  -2 66.7051 10.4036   1
  -8  -4  -2 62.8610 5.22350   4
  -8  -4  -2 64.2615 12.1566   3
  -8   4  -2 54.2545 11.3286   1
  -8   4  -2 53.8313 12.3970   1
  -8   4  -2 51.5997 12.1130   3
   9  -4   2 174.213 17.8755   1
   9  -4   2 174.669 16.0043   1
  -9  -4  -2 180.371 18.7677   2
  -9  -4  -2 194.484 21.7242   3
  -9  -4  -2 191.601 15.5239   1
  -9  -4  -2 163.426 16.4621   1
  -9   4  -2 193.872 21.0504   3
  -9   4  -2 173.529 23.5809   1
  -9   4  -2 164.055 19.3576   1
 -10  -4  -2 54.7149 17.5038   3
  10  -4   2 77.1778 11.8634   1
 -10  -4  -2 73.7760 13.8561   2
  10  -4   2 53.8375 9.71140   1
 -10  -4  -2 70.1014 12.3941   1
 -10  -4  -2 61.6060 10.9263   1
 -10   4  -2 42.8009 12.7375   1
 -10   4  -2 36.8612 13.6745   3
 -11  -4  -2 2.36424 11.1465   1
 -11  -4  -2 19.1401 14.0595   1
 -11  -4  -2 -10.306 13.4121   3
 -11  -4  -2 35.0203 15.1392   2
 -11   4  -2 -2.4941 12.9811   3
 -12  -4  -2 3.04726 13.2343   1
 -12  -4  -2 -4.3558 16.2680   3
 -12   4  -2 11.6208 16.1285   1
 -12   4  -2 12.8127 16.8441   3
 -13  -4  -2 2.64250 22.3376   3
 -13   4  -2 2.06280 18.6194   1
 -13   4  -2 9.90546 20.1170   3
 -14  -5   2 -1.9204 22.6978   3
 -14   5   2 30.4076 20.1023   1
 -14   5   2 37.1787 22.6589   3
  13  -5  -2 32.1844 11.4527   1
 -13  -5   2 62.7974 14.3527   1
 -13  -5   2 49.5025 19.9360   3
 -13   5   2 56.8420 17.6038   1
 -13   5   2 35.4849 18.1884   3
 -12  -5   2 242.002 17.4312   4
 -12  -5   2 235.319 28.8350   3
 -12  -5   2 201.049 21.0187   1
  12  -5  -2 253.360 23.0463   1
 -12  -5   2 220.093 25.4937   1
  12  -5  -2 239.502 22.1021   1
  12  -5  -2 214.906 18.4498   4
 -12   5   2 266.651 29.5588   3
 -12   5   2 249.209 30.1788   1
  11  -5  -2 82.3638 12.9281   1
 -11  -5   2 86.6550 17.2367   3
  11  -5  -2 69.4161 10.7683   4
 -11  -5   2 69.9953 12.5534   1
  11  -5  -2 65.2058 12.5428   1
 -11  -5   2 99.4353 13.7020   1
 -11  -5   2 82.1880 10.9643   4
 -11   5   2 84.9200 15.2799   1
 -11   5   2 53.7734 16.7485   3
 -10  -5   2 146.002 19.5686   1
 -10  -5   2 200.502 15.0458   1
  10  -5  -2 171.979 14.1577   4
 -10  -5   2 192.475 21.7453   2
 -10  -5   2 191.185 21.8279   3
 -10  -5   2 176.893 14.5290   4
  10  -5  -2 212.409 19.2746   1
  10  -5  -2 168.934 18.6466   1
 -10   5   2 152.473 24.8367   1
 -10   5   2 229.369 23.7415   3
 -10   5   2 211.376 20.1276   1
   9  -5  -2 810.815 49.1252   1
   9  -5  -2 916.803 50.7392   1
  -9  -5   2 820.188 47.4143   1
  -9  -5   2 822.882 51.4916   2
  -9  -5   2 862.563 46.6108   1
   9  -5  -2 871.198 46.5922   4
  -9  -5   2 898.914 47.2355   4
  -9   5   2 920.799 51.8890   1
  -9   5   2 889.070 53.3613   3
  -9   5   2 728.962 52.2544   1
   8  -5  -2 111.372 13.5566   1
  -8  -5   2 112.606 14.8143   2
  -8  -5   2 130.845 11.5625   4
   8  -5  -2 130.892 10.8234   4
   8  -5  -2 110.965 15.0637   1
  -8  -5   2 103.035 11.3055   1
  -8  -5   2 131.621 10.9273   1
  -8   5   2 139.856 16.8543   3
  -8   5   2 151.751 16.2492   1
  -8   5   2 128.194 16.7674   1
  -7  -5   2 700.599 38.6003   1
   7  -5  -2 770.324 39.3653   4
   7  -5  -2 689.059 41.2871   1
  -7  -5   2 764.708 40.0058   4
  -7  -5   2 676.009 37.7193   1
  -7  -5   2 714.694 42.5959   2
   7  -5  -2 731.381 42.8003   1
  -7   5   2 686.010 43.0907   3
  -7   5   2 667.676 43.1821   1
  -7   5   2 722.806 42.3256   1
   6  -5  -2 67.1347 10.4579   1
  -6  -5   2 73.2441 8.21216   4
   6  -5  -2 71.3068 7.18941   4
   6  -5  -2 60.3344 9.55232   1
  -6  -5   2 65.8053 6.27903   1
  -6  -5   2 64.9022 10.1589   2
  -6   5   2 61.3458 10.6651   1
  -6   5   2 64.9686 10.0278   1
  -5  -5   2 883.542 46.8883   4
   5  -5  -2 916.777 49.3600   1
   5  -5  -2 842.982 47.6212   1
   5  -5  -2 848.623 46.2490   4
  -5  -5   2 828.511 44.6513   1
  -5  -5   2 883.453 48.5438   2
  -5  -5   2 851.916 45.0369   1
  -5   5   2 894.526 48.3489   1
  -5   5   2 790.962 48.6300   1
  -4  -5   2 197.612 11.5525   1
   4  -5  -2 183.299 13.8180   1
  -4  -5   2 201.461 13.4413   4
   4  -5  -2 205.658 15.5096   1
  -4  -5   2 204.383 14.8398   2
   4  -5  -2 200.225 12.7283   4
  -4  -5   2 192.421 11.2610   1
  -4   5   2 173.493 16.5577   1
  -4   5   2 204.550 14.5067   1
  -3  -5   2 271.279 16.1168   4
   3  -5  -2 250.507 16.0242   1
  -3  -5   2 253.249 14.1627   1
  -3  -5   2 267.169 14.2738   1
  -3  -5   2 259.523 16.5633   2
   3  -5  -2 276.613 17.5241   1
  -3   5   2 227.880 15.9971   1
  -3   5   2 200.840 16.2210   1
   3   5  -2 216.174 15.7940   2
  -2  -5   2 619.333 33.5128   2
  -2  -5   2 586.380 32.0862   1
  -2  -5   2 598.125 33.1661   4
   2  -5  -2 668.536 34.4178   1
  -2  -5   2 574.576 32.2732   3
  -2  -5   2 585.147 32.0192   1
   2  -5  -2 579.046 32.9923   1
  -2   5   2 595.061 33.5953   1
   2   5  -2 564.808 31.6615   1
  -2   5   2 612.483 33.3230   1
   2   5  -2 593.119 33.2241   2
   2   5  -2 575.809 31.5110   1
  -1  -5   2 135.431 8.97518   2
  -1  -5   2 117.219 8.53135   1
   1  -5  -2 135.246 9.86164   1
  -1  -5   2 135.575 9.12436   4
   1  -5  -2 131.295 8.70101   1
   1   5  -2 98.3232 8.61845   2
  -1   5   2 94.2019 8.28757   1
   1   5  -2 93.4798 7.67158   3
   1   5  -2 90.5401 7.92468   1
  -1   5   2 96.9320 9.25830   1
   1   5  -2 106.157 7.77431   1
   0  -5   2 332.002 19.5094   2
   0  -5  -2 318.276 19.5880   1
   0  -5   2 327.939 19.0219   3
   0  -5  -2 321.235 19.1081   1
   0  -5   2 324.030 19.6737   1
   0  -5   2 317.978 19.6934   4
   0  -5   2 330.315 19.9204   1
   0   5  -2 369.154 19.8288   1
   0   5  -2 347.758 20.8847   2
   0   5   2 365.280 20.0523   2
   0   5  -2 324.307 19.1532   3
   0   5   2 347.885 19.1122   1
   0   5  -2 346.699 20.1530   1
   0   5   2 346.990 18.0475   3
   0   5   2 346.606 18.9984   1
   1  -5   2 2274.32 124.431   4
  -1  -5  -2 2324.38 123.319   3
   1  -5   2 2324.36 125.011   1
  -1  -5  -2 2389.27 123.946   1
   1  -5   2 2467.84 125.323   1
  -1  -5  -2 2413.65 124.511   2
  -1  -5  -2 2303.33 123.625   1
   1  -5   2 2347.33 124.473   3
   1   5   2 2617.39 124.969   2
  -1   5  -2 2471.68 125.555   1
   1   5   2 2414.46 123.491   3
   1   5   2 2350.41 122.938   1
  -1   5  -2 2584.92 125.194   1
   1   5   2 2465.61 122.965   1
  -2  -5  -2 4.28594 3.23104   2
   2  -5   2 5.49305 3.84074   1
  -2  -5  -2 6.12069 2.04864   1
  -2  -5  -2 7.53816 2.15663   1
   2  -5   2 9.16785 4.36633   1
   2  -5   2 1.23063 3.25709   3
  -2  -5  -2 9.24293 2.64452   3
  -2   5  -2 9.69228 4.01442   1
  -2   5  -2 2.10985 3.33332   3
  -2   5  -2 4.76073 3.29676   2
  -2   5  -2 6.47788 4.39974   1
   2   5   2 2.58376 2.56236   3
   2   5   2 1.82483 3.40497   2
   3  -5   2 1684.99 93.3861   1
  -3  -5  -2 1739.20 92.1840   2
  -3  -5  -2 1680.81 90.1731   1
  -3  -5  -2 1704.23 90.2554   1
  -3  -5  -2 1864.69 92.1234   3
   3  -5   2 1784.28 93.1987   1
   3  -5   2 1646.02 93.0663   3
   3   5   2 1815.77 92.3763   2
  -3   5  -2 1809.91 93.2360   1
  -3   5  -2 1876.27 93.2287   3
   4  -5   2 273.344 17.9988   4
  -4  -5  -2 358.600 20.3366   3
   4  -5   2 306.681 20.6817   1
  -4  -5  -2 322.788 17.0220   1
  -4  -5  -2 313.995 17.1533   1
  -4  -5  -2 323.274 19.8183   2
   4  -5   2 325.099 20.6333   1
   4  -5   2 284.892 21.0931   3
  -4   5  -2 282.341 21.1273   1
  -4   5  -2 317.641 20.7662   1
   4   5   2 343.923 21.5534   2
  -4   5  -2 323.231 20.9399   3
   5  -5   2 271.297 19.5740   1
  -5  -5  -2 284.627 19.0579   3
   5  -5   2 251.704 18.8286   1
  -5  -5  -2 264.191 15.2474   1
  -5  -5  -2 279.056 18.2410   2
   5  -5   2 250.744 20.1488   3
   5  -5   2 224.837 15.5924   4
  -5   5  -2 301.302 20.0486   1
  -5   5  -2 331.644 20.6645   3
  -5   5  -2 274.069 20.2414   1
   6  -5   2 447.491 27.3016   1
   6  -5   2 396.595 23.0363   4
   6  -5   2 415.457 27.1344   1
  -6  -5  -2 421.473 23.2888   1
  -6  -5  -2 425.511 26.6620   2
  -6  -5  -2 418.428 23.5364   1
  -6  -5  -2 414.212 24.5407   4
  -6  -5  -2 458.773 27.8846   3
  -6   5  -2 444.952 28.6424   3
  -6   5  -2 443.954 27.8800   1
  -6   5  -2 397.415 29.0535   1
  -7  -5  -2 772.072 44.2951   2
   7  -5   2 735.966 39.5569   4
  -7  -5  -2 751.292 41.2384   1
  -7  -5  -2 803.157 41.6391   4
   7  -5   2 734.812 44.8771   1
   7  -5   2 818.808 44.6425   1
   7  -5   2 768.702 39.5142   4
  -7  -5  -2 836.368 46.3069   3
  -7   5  -2 787.586 46.9245   3
  -7   5  -2 696.785 46.3633   1
  -7   5  -2 737.008 45.3466   1
  -8  -5  -2 66.4318 11.3949   2
   8  -5   2 73.8529 12.7344   1
  -8  -5  -2 65.3706 12.2447   3
   8  -5   2 73.7426 12.0221   1
  -8  -5  -2 67.6381 9.08181   1
  -8  -5  -2 57.7987 9.16568   1
  -8   5  -2 69.4467 14.5664   1
  -8   5  -2 64.7790 12.3370   1
  -8   5  -2 73.2166 12.6260   3
   9  -5   2 26.9049 10.7504   1
  -9  -5  -2 25.6288 6.64861   1
  -9  -5  -2 13.6166 3.17044   4
  -9  -5  -2 21.7474 7.56809   1
  -9  -5  -2 10.0113 10.5365   2
  -9  -5  -2 31.9849 10.9827   3
   9  -5   2 22.8123 8.74543   1
  -9   5  -2 8.29132 9.99824   1
  -9   5  -2 6.75504 10.5690   3
  10  -5   2 -7.9383 11.1809   1
  10  -5   2 10.8238 8.91313   1
 -10  -5  -2 18.3370 9.88026   1
 -10  -5  -2 28.9718 13.4892   2
 -10  -5  -2 -16.641 15.0626   3
 -10  -5  -2 0.86044 7.90777   1
 -10   5  -2 23.7313 13.0715   1
 -10   5  -2 37.0182 13.1393   3
 -11  -5  -2 18.2157 15.8892   3
 -11  -5  -2 11.5562 10.2469   1
  11  -5   2 8.22398 9.38961   1
 -11  -5  -2 11.3662 16.5537   2
 -11   5  -2 31.1087 14.3903   1
 -11   5  -2 33.3676 15.1169   3
 -12  -5  -2 127.894 22.2294   3
 -12  -5  -2 88.0437 15.9837   1
 -12   5  -2 81.2088 21.0865   3
 -12   5  -2 87.5618 19.2263   1
 -13  -5  -2 52.4619 23.0501   3
 -13   5  -2 41.1756 23.7224   3
 -13   5  -2 65.0816 21.9337   1
 -14  -6   2 -21.569 21.9173   3
 -14   6   2 20.6692 22.3928   3
 -14   6   2 -4.3872 21.0274   1
 -13  -6   2 53.3471 20.2474   3
  13  -6  -2 38.9164 14.5686   1
 -13  -6   2 54.2624 14.0736   1
 -13   6   2 44.4887 19.4123   3
 -13   6   2 88.2466 19.7961   1
 -12  -6   2 94.1827 12.9630   4
  12  -6  -2 81.1740 16.5808   1
 -12  -6   2 120.342 21.3374   3
 -12  -6   2 95.8177 13.1271   1
 -12  -6   2 75.2502 18.9708   1
  12  -6  -2 111.377 16.1883   1
 -12   6   2 72.8936 19.1121   3
 -12   6   2 92.6125 18.1421   1
 -11  -6   2 298.186 23.9490   1
 -11  -6   2 317.934 21.7665   1
 -11  -6   2 310.761 21.2409   4
 -11  -6   2 274.975 29.1431   3
  11  -6  -2 330.209 26.6002   1
  11  -6  -2 272.016 26.1704   1
  11  -6  -2 291.501 20.9488   4
 -11   6   2 329.124 27.9483   1
 -11   6   2 324.502 30.6614   3
 -10  -6   2 104.184 12.2753   4
  10  -6  -2 142.460 18.8472   1
 -10  -6   2 89.5122 13.5950   1
  10  -6  -2 103.423 17.3946   1
 -10  -6   2 99.8066 17.5203   2
 -10  -6   2 138.387 12.1547   1
 -10  -6   2 162.455 20.0307   3
 -10   6   2 115.117 19.4008   1
 -10   6   2 135.736 20.4547   3
   9  -6  -2 10.9807 9.32288   1
  -9  -6   2 9.17418 5.26823   1
   9  -6  -2 8.19446 9.95536   1
  -9  -6   2 7.04833 5.60061   1
  -9  -6   2 19.9649 10.6496   2
  -9  -6   2 10.7851 5.80779   4
  -9   6   2 19.3609 9.74560   1
  -9   6   2 23.4976 11.1577   3
  -9   6   2 35.5394 12.9924   1
   8  -6  -2 829.229 50.8225   1
  -8  -6   2 847.301 47.7724   1
   8  -6  -2 928.544 52.7351   1
  -8  -6   2 821.823 46.8430   1
  -8  -6   2 952.110 49.4809   4
  -8  -6   2 917.774 52.7037   2
  -8   6   2 851.884 53.5497   1
  -8   6   2 905.824 53.6176   3
  -8   6   2 961.714 53.2149   1
   7  -6  -2 224.499 15.0733   4
  -7  -6   2 210.861 13.4303   1
  -7  -6   2 232.516 18.6509   2
  -7  -6   2 223.833 15.9455   4
  -7  -6   2 200.103 12.3705   1
   7  -6  -2 191.911 17.5496   1
   7  -6  -2 229.526 18.9975   1
  -7   6   2 216.351 19.0018   1
  -7   6   2 207.955 18.8325   3
  -7   6   2 185.076 19.0616   1
  -6  -6   2 449.400 28.5036   2
  -6  -6   2 415.572 23.8733   1
  -6  -6   2 437.569 26.3996   4
  -6  -6   2 416.953 23.3319   1
   6  -6  -2 425.878 25.4784   4
   6  -6  -2 430.121 28.8448   1
   6  -6  -2 420.396 27.2546   1
  -6   6   2 483.549 28.7527   3
  -6   6   2 481.212 29.5450   1
   5  -6  -2 308.152 20.9583   1
   5  -6  -2 313.216 19.4134   4
  -5  -6   2 323.813 21.8869   2
  -5  -6   2 309.461 17.3672   1
   5  -6  -2 327.474 22.9502   1
  -5  -6   2 346.027 20.4108   4
  -5  -6   2 321.434 17.7322   1
  -5   6   2 296.428 21.9350   1
  -5   6   2 315.491 21.4782   1
  -4  -6   2 604.356 33.1949   1
   4  -6  -2 633.358 37.4261   1
  -4  -6   2 629.465 33.2882   1
  -4  -6   2 620.978 35.4718   4
  -4  -6   2 654.014 36.7467   2
   4  -6  -2 603.221 35.8516   1
  -4   6   2 684.026 36.8313   1
  -4   6   2 573.728 36.6211   1
   4   6  -2 638.843 36.1008   2
   3  -6  -2 39.8666 7.61444   1
  -3  -6   2 41.0729 4.71386   1
  -3  -6   2 36.9583 4.44647   1
  -3  -6   2 33.2262 6.27836   2
   3  -6  -2 33.3515 6.04057   1
  -3  -6   2 52.7199 6.80487   4
  -3   6   2 35.7484 6.82107   1
   3   6  -2 40.3678 6.80438   2
  -3   6   2 30.0843 6.13576   1
   2  -6  -2 105.019 10.9088   1
  -2  -6   2 92.0815 9.34437   4
  -2  -6   2 103.118 8.28652   1
  -2  -6   2 108.953 8.66172   1
   2  -6  -2 101.636 9.61479   1
  -2  -6   2 107.509 8.39579   3
  -2  -6   2 109.768 9.92091   2
  -2   6   2 141.633 10.0439   1
   2   6  -2 139.494 10.1968   2
   2   6  -2 129.632 7.85947   1
   2   6  -2 126.713 8.18177   1
  -2   6   2 145.184 10.7637   1
   1  -6  -2 1202.36 60.5649   1
  -1  -6   2 1114.45 59.8686   2
  -1  -6   2 1063.28 59.7134   4
   1  -6  -2 1086.99 59.3421   1
  -1  -6   2 1153.87 59.5877   1
  -1  -6   2 1118.46 58.5425   3
  -1  -6   2 1092.50 59.1469   1
  -1   6   2 1121.61 59.7122   1
   1   6  -2 1124.91 59.8982   2
  -1   6   2 1175.29 59.5236   1
   1   6  -2 1111.92 59.2617   1
   1   6  -2 1056.35 58.6415   3
   0  -6   2 615.046 36.0099   4
   0  -6   2 655.061 35.9303   2
   0  -6   2 689.755 36.5849   1
   0  -6  -2 632.475 35.3686   1
   0  -6   2 647.143 35.1225   3
   0  -6   2 643.049 36.0757   1
   0   6  -2 697.757 36.0598   1
   0   6   2 612.126 34.9989   1
   0   6   2 643.735 35.2407   1
   0   6  -2 714.152 36.4046   2
   0   6   2 670.503 36.3007   2
   0   6   2 655.307 33.7856   3
   0   6  -2 624.337 36.2143   1
   0   6  -2 626.748 35.1319   3
  -1  -6  -2 2149.87 114.568   1
  -1  -6  -2 2146.32 113.420   3
   1  -6   2 2311.35 116.121   1
  -1  -6  -2 2145.36 114.173   1
   1  -6   2 2185.83 114.869   3
   1  -6   2 2181.43 115.683   1
  -1   6  -2 2207.75 116.163   1
   1   6   2 2056.50 113.214   1
   1   6   2 2373.54 115.820   2
  -1   6  -2 2281.46 115.151   3
   1   6   2 2194.26 113.279   1
  -1   6  -2 2400.15 115.383   2
  -1   6  -2 2327.88 115.725   1
   1   6   2 2085.11 113.518   3
  -2  -6  -2 3472.78 186.070   1
  -2  -6  -2 3450.90 186.352   3
   2  -6   2 3820.41 188.979   1
  -2  -6  -2 3499.89 187.606   2
   2  -6   2 3544.83 190.240   1
  -2  -6  -2 3523.09 186.299   1
   2  -6   2 3491.22 187.846   3
  -2   6  -2 3891.27 188.639   1
  -2   6  -2 3619.14 189.507   1
   2   6   2 3866.18 188.581   2
  -2   6  -2 3765.93 187.510   2
  -2   6  -2 3807.83 187.860   3
  -3  -6  -2 477.420 25.4239   1
   3  -6   2 484.422 28.7102   1
  -3  -6  -2 462.356 27.4096   2
  -3  -6  -2 507.373 26.9082   3
  -3  -6  -2 455.085 25.1162   1
   3  -6   2 446.665 28.3531   1
   3  -6   2 467.642 28.2661   3
   3   6   2 501.105 28.0161   2
  -3   6  -2 466.233 27.8708   3
  -3   6  -2 474.898 28.4573   1
  -3   6  -2 447.446 28.9982   1
  -4  -6  -2 1919.50 100.875   1
  -4  -6  -2 1920.62 103.617   2
   4  -6   2 2028.71 104.790   1
   4  -6   2 1928.44 104.592   1
   4  -6   2 1863.67 104.783   3
  -4  -6  -2 1892.53 100.786   1
  -4  -6  -2 2091.45 103.569   3
   4   6   2 2052.05 103.771   2
  -4   6  -2 2075.48 104.691   3
  -4   6  -2 1906.95 105.509   1
  -4   6  -2 2004.94 104.765   1
   5  -6   2 123.082 12.8598   1
  -5  -6  -2 118.714 7.62411   1
  -5  -6  -2 125.677 7.41694   1
   5  -6   2 102.372 13.2428   3
   5  -6   2 100.827 9.29543   4
   5  -6   2 115.064 12.3088   1
  -5  -6  -2 120.603 11.7700   2
  -5  -6  -2 125.721 11.5588   3
  -5   6  -2 114.250 12.9158   3
  -5   6  -2 139.178 13.7439   1
  -5   6  -2 124.055 14.8005   1
  -6  -6  -2 599.489 34.6515   4
  -6  -6  -2 634.253 37.3263   3
  -6  -6  -2 625.736 36.5778   2
  -6  -6  -2 590.653 32.7881   1
   6  -6   2 664.840 37.6859   1
   6  -6   2 580.031 37.1417   1
  -6   6  -2 614.686 37.7029   1
  -6   6  -2 650.087 38.3752   3
  -6   6  -2 583.680 39.1947   1
  -7  -6  -2 151.837 11.7950   4
  -7  -6  -2 146.164 14.8848   2
   7  -6   2 135.888 9.13210   4
   7  -6   2 148.814 15.0153   1
  -7  -6  -2 126.532 9.96416   1
  -7  -6  -2 129.403 9.68659   1
   7  -6   2 118.555 15.8966   1
   7  -6   2 114.723 9.31736   4
  -7  -6  -2 130.919 15.1250   3
  -7   6  -2 187.101 17.9116   3
  -7   6  -2 171.840 16.9463   1
  -7   6  -2 162.629 18.4125   1
  -8  -6  -2 281.887 24.1351   3
  -8  -6  -2 276.687 17.5648   4
  -8  -6  -2 241.723 21.9446   2
   8  -6   2 282.327 23.0844   1
  -8  -6  -2 289.334 17.9211   1
   8  -6   2 300.816 21.8806   1
  -8  -6  -2 243.649 17.1251   1
  -8   6  -2 280.467 22.8480   1
  -8   6  -2 281.275 24.5361   3
  -8   6  -2 234.281 26.5841   1
  -9  -6  -2 11.9510 4.82461   4
   9  -6   2 8.67365 9.41469   1
  -9  -6  -2 10.3332 5.86875   1
  -9  -6  -2 4.52441 9.83965   1
  -9  -6  -2 2.55385 10.4964   2
   9  -6   2 8.90846 11.2196   1
  -9  -6  -2 23.7577 10.4583   3
  -9   6  -2 -13.368 10.0515   3
  -9   6  -2 2.69495 10.2913   1
  10  -6   2 35.8886 13.8254   1
 -10  -6  -2 30.9342 13.9843   2
 -10  -6  -2 47.8020 10.5017   1
 -10  -6  -2 28.9208 8.73053   1
  10  -6   2 38.3177 11.0128   1
 -10  -6  -2 32.1206 14.6874   3
 -10  -6  -2 32.6619 5.26009   4
 -10   6  -2 23.2693 14.0344   3
 -11  -6  -2 -24.359 13.1742   3
 -11  -6  -2 32.5190 17.7966   2
 -11  -6  -2 -9.8583 9.50687   1
  11  -6   2 -2.2236 10.6554   1
 -11   6  -2 -1.6354 13.9234   1
 -11   6  -2 4.24918 15.0879   3
 -12  -6  -2 101.839 21.7027   3
  12  -6   2 111.370 17.7173   1
 -12   6  -2 166.974 27.6877   1
 -12   6  -2 126.261 22.9979   3
 -13  -6  -2 33.9386 21.8903   3
 -13   6  -2 -9.0751 21.2111   1
 -13   6  -2 -12.347 22.7063   3
 -14  -7   2 56.6775 26.2108   3
 -14   7   2 119.728 25.4155   1
 -14   7   2 25.9404 23.2959   3
 -13  -7   2 38.1854 20.9895   3
  13  -7  -2 1.93063 15.1796   1
 -13   7   2 -12.924 17.3835   1
 -13   7   2 -24.573 17.7990   3
 -12  -7   2 143.930 16.5396   1
 -12  -7   2 124.028 21.9899   3
  12  -7  -2 88.9672 18.8696   1
  12  -7  -2 118.153 18.3423   1
 -12  -7   2 101.116 12.7218   4
 -12   7   2 163.688 23.4347   1
 -12   7   2 145.338 22.4796   3
 -11  -7   2 217.537 20.1872   1
  11  -7  -2 211.600 23.6855   4
  11  -7  -2 199.279 25.1560   1
 -11  -7   2 259.539 19.7651   4
 -11  -7   2 258.712 18.1570   1
 -11  -7   2 252.421 29.4838   3
 -11   7   2 226.060 29.7026   1
 -11   7   2 236.700 27.8043   3
  10  -7  -2 301.805 26.3842   1
  10  -7  -2 285.056 19.9660   4
 -10  -7   2 262.237 20.5523   4
 -10  -7   2 302.026 26.5960   3
  10  -7  -2 278.632 25.4573   1
 -10  -7   2 255.171 20.0494   1
 -10  -7   2 281.269 18.8897   1
 -10   7   2 303.850 27.6205   3
 -10   7   2 307.013 26.1785   1
  -9  -7   2 199.103 14.9971   1
   9  -7  -2 209.055 16.1314   4
  -9  -7   2 238.877 17.3104   4
   9  -7  -2 205.837 21.9604   1
  -9  -7   2 191.737 22.1238   2
  -9  -7   2 190.791 14.0728   1
   9  -7  -2 194.513 20.6159   1
  -9  -7   2 204.145 21.5821   3
  -9   7   2 232.726 22.4524   1
  -9   7   2 211.534 26.1482   1
  -9   7   2 230.786 22.9087   3
  -8  -7   2 194.048 13.6417   1
   8  -7  -2 228.476 21.1866   1
  -8  -7   2 207.592 16.4024   4
   8  -7  -2 194.908 18.9131   1
   8  -7  -2 212.363 16.3838   4
  -8  -7   2 199.424 12.5260   1
  -8  -7   2 215.749 20.8230   2
  -8   7   2 214.264 20.6979   3
  -8   7   2 208.220 20.6819   1
  -8   7   2 205.192 22.9698   1
  -7  -7   2 390.973 25.1071   4
  -7  -7   2 396.961 28.2356   2
   7  -7  -2 391.878 29.1779   1
  -7  -7   2 381.726 22.3338   1
   7  -7  -2 387.841 27.1248   1
   7  -7  -2 361.314 24.1486   4
  -7   7   2 453.447 28.6889   3
  -7   7   2 451.493 28.8878   1
  -7   7   2 425.261 29.4271   1
  -6  -7   2 30.6675 8.28445   2
   6  -7  -2 35.9297 9.23764   1
  -6  -7   2 21.0057 6.28206   4
   6  -7  -2 15.0752 7.66719   1
  -6  -7   2 20.5617 2.98233   1
  -6  -7   2 25.5325 3.61378   1
   6  -7  -2 18.7001 5.05036   4
  -6   7   2 15.0291 6.85589   3
  -6   7   2 22.5174 7.80999   1
  -6   7   2 22.2994 8.74939   1
   5  -7  -2 151.272 14.3937   1
   5  -7  -2 189.995 16.3824   1
  -5  -7   2 166.126 10.2043   1
  -5  -7   2 195.571 14.6742   2
  -5  -7   2 170.267 10.0369   1
  -5  -7   2 181.358 13.4815   4
  -5   7   2 141.875 13.4759   3
  -5   7   2 133.170 14.5877   1
  -5   7   2 119.905 14.5735   1
  -4  -7   2 1286.12 69.3711   1
   4  -7  -2 1307.26 72.1490   1
   4  -7  -2 1376.59 73.7725   1
  -4  -7   2 1336.86 69.3432   1
  -4  -7   2 1344.79 71.8305   4
  -4  -7   2 1340.41 72.7431   2
  -4   7   2 1243.29 72.8114   1
   4   7  -2 1380.34 72.3605   2
  -4   7   2 1396.03 72.7300   1
   3  -7  -2 1010.00 52.3216   1
  -3  -7   2 935.584 48.4119   1
   3  -7  -2 868.718 50.3544   1
  -3  -7   2 921.602 50.3877   4
  -3  -7   2 939.612 50.9767   2
  -3  -7   2 880.493 48.4985   1
   3   7  -2 857.095 50.3485   2
  -3   7   2 895.985 50.4912   1
  -2  -7   2 767.476 41.3740   1
   2  -7  -2 806.118 44.0972   1
  -2  -7   2 750.151 43.2884   2
   2  -7  -2 710.616 42.2731   1
  -2  -7   2 753.089 42.7285   4
  -2  -7   2 766.109 43.1356   1
  -2  -7   2 768.578 41.0426   3
  -2   7   2 735.259 42.8330   1
   2   7  -2 758.127 40.7937   1
   2   7  -2 833.713 43.2732   2
  -2   7   2 808.230 42.7638   1
   2   7  -2 741.753 40.4486   1
  -1  -7   2 1102.55 56.8762   1
  -1  -7   2 1046.07 57.0667   2
  -1  -7   2 1073.16 56.4521   1
  -1  -7   2 1069.65 57.3098   4
  -1  -7   2 1052.80 55.3692   3
   1  -7  -2 1138.90 57.9170   1
   1  -7  -2 1017.64 56.5399   1
  -1   7   2 988.862 54.3799   3
   1   7  -2 992.113 56.2841   1
   1   7  -2 1055.51 57.2119   2
  -1   7   2 1062.82 56.4901   1
   1   7  -2 1098.66 55.9852   1
  -1   7   2 1018.51 56.7443   1
   0  -7   2 343.609 20.6844   2
   0  -7   2 368.521 21.3296   1
   0  -7   2 337.503 20.6202   1
   0  -7   2 326.743 19.3583   3
   0  -7  -2 333.020 20.0453   1
   0  -7  -2 339.530 21.0934   1
   0   7  -2 369.399 20.6939   1
   0   7  -2 312.545 19.4327   3
   0   7   2 316.614 17.6087   3
   0   7   2 346.508 21.1005   2
   0   7   2 339.262 19.8094   1
   0   7  -2 345.379 20.8939   2
   0   7  -2 325.656 20.8552   1
   1  -7   2 729.239 41.5256   3
  -1  -7  -2 731.295 39.7743   3
   1  -7   2 716.116 44.2697   1
  -1  -7  -2 731.471 41.0744   1
  -1  -7  -2 683.862 42.8423   1
   1  -7   2 791.558 43.2637   1
  -1   7  -2 761.058 43.2167   1
  -1   7  -2 822.446 42.4819   2
   1   7   2 758.685 39.9917   1
  -1   7  -2 808.484 41.7063   3
  -1   7  -2 796.692 42.6238   1
   1   7   2 838.056 43.0014   2
   1   7   2 790.805 40.0245   1
  -2  -7  -2 382.853 21.8648   3
   2  -7   2 427.560 25.3433   1
  -2  -7  -2 386.824 22.4882   1
   2  -7   2 377.848 24.6093   1
  -2  -7  -2 382.388 22.1018   1
   2  -7   2 382.920 23.6804   3
  -2  -7  -2 391.074 23.8735   2
  -2   7  -2 412.146 24.8389   1
  -2   7  -2 425.863 23.8811   3
   2   7   2 399.078 24.3392   2
  -2   7  -2 424.488 23.9020   2
  -2   7  -2 382.903 25.2207   1
   3  -7   2 533.220 32.0456   1
  -3  -7  -2 492.047 27.9326   1
  -3  -7  -2 508.791 30.1075   3
   3  -7   2 490.032 31.0913   3
  -3  -7  -2 433.046 34.5231   2
   3  -7   2 517.106 31.7007   1
  -3  -7  -2 519.395 28.1834   1
  -3   7  -2 549.436 32.5072   1
  -3   7  -2 549.041 30.7542   3
   3   7   2 558.018 31.0939   2
  -3   7  -2 577.487 30.3799   2
  -3   7  -2 537.116 31.6354   1
  -4  -7  -2 55.8100 9.35892   2
  -4  -7  -2 74.0354 8.17216   3
   4  -7   2 58.4257 10.1763   1
  -4  -7  -2 56.8321 5.15063   1
  -4  -7  -2 60.1104 5.07276   1
   4  -7   2 64.4515 11.1610   1
   4  -7   2 65.3461 10.1325   3
  -4   7  -2 80.2790 10.2497   1
  -4   7  -2 71.3211 11.3110   1
  -4   7  -2 84.3777 9.68390   3
   4   7   2 78.2015 9.68944   2
   5  -7   2 171.563 16.4993   1
   5  -7   2 174.076 16.2338   3
  -5  -7  -2 176.423 10.1964   1
   5  -7   2 201.157 16.7468   1
  -5  -7  -2 197.110 14.6466   3
  -5  -7  -2 176.624 10.3310   1
  -5  -7  -2 159.905 14.3690   2
  -5   7  -2 155.469 17.4098   1
  -5   7  -2 164.401 15.4271   3
   5   7   2 175.164 14.6021   2
  -5   7  -2 165.751 16.3338   1
   6  -7   2 209.618 18.2871   1
  -6  -7  -2 191.758 12.0474   1
   6  -7   2 193.065 14.1366   4
  -6  -7  -2 193.562 11.7480   1
   6  -7   2 182.875 18.9432   1
  -6  -7  -2 237.317 17.0746   2
  -6  -7  -2 209.079 16.7118   3
  -6   7  -2 212.845 18.6376   3
  -6   7  -2 229.604 21.3175   1
  -6   7  -2 228.116 18.6440   1
  -7  -7  -2 274.315 20.8238   2
   7  -7   2 260.023 21.1421   1
  -7  -7  -2 241.597 15.2709   1
  -7  -7  -2 230.568 14.6422   1
   7  -7   2 229.900 15.0552   4
  -7  -7  -2 252.816 20.1153   3
  -7  -7  -2 259.288 17.6320   4
   7  -7   2 245.574 22.0585   1
   7  -7   2 233.234 17.0312   4
  -7   7  -2 196.917 24.1143   1
  -7   7  -2 259.751 22.1533   1
  -7   7  -2 256.201 21.8286   3
  -8  -7  -2 343.191 20.6193   4
  -8  -7  -2 331.568 25.9164   3
   8  -7   2 307.010 25.9274   1
   8  -7   2 313.974 24.2169   1
  -8  -7  -2 274.765 19.1565   1
   8  -7   2 291.572 17.8506   4
   8  -7   2 331.767 17.6982   4
  -8  -7  -2 276.124 24.6794   2
  -8  -7  -2 298.924 18.5752   1
  -8   7  -2 338.464 26.2437   1
  -8   7  -2 322.407 26.2968   3
  -9  -7  -2 115.021 11.1034   4
   9  -7   2 109.314 16.8075   1
  -9  -7  -2 100.035 17.2916   3
  -9  -7  -2 96.4153 11.6494   1
   9  -7   2 135.180 17.4191   1
  -9  -7  -2 104.232 11.6473   1
  -9  -7  -2 103.560 16.7000   2
  -9   7  -2 76.4878 20.1377   3
  -9   7  -2 88.4779 15.7519   1
 -10  -7  -2 22.0107 5.64002   4
 -10  -7  -2 11.8595 8.97033   1
 -10  -7  -2 0.08933 14.9913   2
 -10  -7  -2 -2.9165 13.7517   3
  10  -7   2 15.2316 15.3143   1
  10  -7   2 22.0299 11.6850   1
 -10  -7  -2 10.5656 7.42666   1
 -10   7  -2 16.2699 14.2307   3
 -10   7  -2 12.8494 12.9733   1
 -11  -7  -2 47.6462 10.6747   1
  11  -7   2 54.2106 13.6927   1
 -11   7  -2 61.7845 17.4559   1
 -11   7  -2 23.8385 17.5396   3
 -12  -7  -2 36.7836 20.1681   3
  12  -7   2 58.7843 15.3239   1
 -12   7  -2 25.7299 18.6065   1
 -12   7  -2 44.2126 19.6859   3
 -13  -7  -2 52.3767 24.8207   3
 -13   7  -2 -4.6328 21.2884   1
 -13   7  -2 43.8383 25.3346   3
 -14  -8   2 35.8173 24.8731   3
 -14   8   2 17.6688 23.8286   1
 -14   8   2 35.9948 26.3917   3
  13  -8  -2 123.527 20.2503   1
 -13  -8   2 126.076 23.9109   3
 -13   8   2 77.3951 22.1527   3
 -13   8   2 92.4756 21.9669   1
 -12  -8   2 92.0843 20.2425   3
  12  -8  -2 16.7209 28.8174   1
  12  -8  -2 89.4948 18.8291   1
 -12  -8   2 89.3105 12.3623   4
 -12  -8   2 127.324 15.5879   1
 -12   8   2 73.2808 18.7553   1
 -12   8   2 116.816 21.5988   3
 -11  -8   2 76.6022 11.5890   4
 -11  -8   2 77.0114 16.9153   1
 -11  -8   2 104.013 19.5952   3
  11  -8  -2 51.8928 17.0927   1
  11  -8  -2 79.6186 11.2545   4
 -11  -8   2 81.3058 12.4258   1
 -11   8   2 131.421 22.1507   1
 -11   8   2 105.528 19.1971   3
 -10  -8   2 220.950 23.6302   3
  10  -8  -2 207.237 24.4767   1
 -10  -8   2 217.253 16.6462   1
 -10  -8   2 223.593 17.8565   1
  10  -8  -2 194.573 17.5828   4
  10  -8  -2 238.261 25.0135   1
 -10  -8   2 241.871 18.9478   4
 -10   8   2 225.589 27.7527   1
 -10   8   2 206.592 24.8263   3
  -9  -8   2 11.9579 4.09929   1
  -9  -8   2 42.2959 13.7952   2
   9  -8  -2 22.1675 7.25895   4
   9  -8  -2 37.2157 12.2966   1
  -9  -8   2 24.2507 12.5101   3
   9  -8  -2 26.1633 13.0773   1
  -9  -8   2 18.2177 8.00637   4
  -9  -8   2 18.1683 5.55259   1
  -9   8   2 2.09268 11.5314   3
  -9   8   2 13.8820 10.6899   1
   8  -8  -2 67.3092 11.1731   4
  -8  -8   2 86.1629 8.20111   1
  -8  -8   2 87.3008 14.8935   2
   8  -8  -2 91.0064 15.0134   1
  -8  -8   2 82.7824 12.4094   4
   8  -8  -2 86.5831 13.8564   1
  -8   8   2 110.051 17.0185   1
  -8   8   2 93.8330 16.0545   3
  -7  -8   2 171.434 19.0554   2
   7  -8  -2 215.455 20.5575   1
   7  -8  -2 177.616 14.5050   4
  -7  -8   2 185.160 11.1072   1
  -7  -8   2 181.744 11.7098   1
  -7  -8   2 208.988 15.8051   4
   7  -8  -2 221.231 19.1551   1
  -7   8   2 184.291 18.9548   1
  -7   8   2 176.632 17.7725   3
  -7   8   2 138.067 18.7585   1
   6  -8  -2 230.609 16.3875   4
   6  -8  -2 224.956 18.5228   1
  -6  -8   2 219.931 19.5699   2
  -6  -8   2 219.391 13.4742   1
  -6  -8   2 234.895 17.7983   4
   6  -8  -2 223.964 20.2302   1
  -6  -8   2 215.307 13.2413   1
  -6   8   2 276.878 19.6087   3
  -6   8   2 221.470 21.1795   1
  -5  -8   2 105.154 7.77448   1
   5  -8  -2 110.747 12.4529   1
  -5  -8   2 110.315 11.9283   4
  -5  -8   2 111.283 13.0180   2
  -5  -8   2 115.917 7.81028   1
   5  -8  -2 103.399 14.0530   1
  -5   8   2 87.0334 11.9463   1
  -5   8   2 88.2742 11.7912   3
  -5   8   2 95.7699 13.3294   1
   5   8  -2 79.1228 11.4828   2
  -4  -8   2 569.576 32.8645   1
  -4  -8   2 600.866 35.7354   4
   4  -8  -2 631.901 38.0046   1
   4  -8  -2 554.455 35.4873   1
  -4  -8   2 593.976 36.3471   2
  -4  -8   2 595.489 32.7314   1
  -4   8   2 639.145 36.2312   1
  -4   8   2 598.228 36.6966   1
   4   8  -2 623.159 35.9841   2
  -4   8   2 631.251 34.7904   3
   3  -8  -2 630.233 35.9189   1
  -3  -8   2 615.869 36.2397   2
  -3  -8   2 631.089 33.6747   1
  -3  -8   2 600.171 33.7791   3
   3  -8  -2 669.522 37.9823   1
  -3  -8   2 608.675 35.7829   4
  -3   8   2 568.343 35.1337   3
  -3   8   2 638.362 35.9184   1
   3   8  -2 614.992 36.0021   2
  -3   8   2 551.421 36.0381   1
  -2  -8   2 376.805 23.3479   4
  -2  -8   2 360.345 21.4031   1
   2  -8  -2 387.281 24.4273   1
   2  -8  -2 349.656 22.5247   1
  -2  -8   2 392.551 22.2446   1
  -2  -8   2 354.910 20.6230   3
  -2  -8   2 376.767 23.2887   2
  -2   8   2 374.471 22.8421   1
  -2   8   2 336.205 22.9107   1
   2   8  -2 375.886 23.3722   2
   2   8  -2 334.143 20.1876   1
   2   8  -2 336.437 20.5723   1
  -1  -8   2 247.018 17.9036   4
  -1  -8   2 238.979 19.3138   2
  -1  -8   2 271.148 17.4413   1
  -1  -8   2 263.600 17.1243   1
   1  -8  -2 293.759 19.1835   1
  -1  -8   2 256.681 15.5675   3
   1  -8  -2 252.899 17.3100   1
  -1   8   2 273.225 17.2264   1
  -1   8   2 287.460 18.4019   2
  -1   8   2 269.224 17.6889   1
   1   8  -2 278.198 18.2699   2
  -1   8   2 262.230 14.2889   3
   1   8  -2 278.827 16.6481   1
  -1   8   2 243.229 14.2843   3
   1   8  -2 260.406 16.9785   1
   0  -8   2 702.531 42.7265   1
   0  -8   2 784.356 42.0013   1
   0  -8   2 742.980 39.7835   3
   0  -8  -2 727.524 40.6298   1
   0  -8  -2 792.023 41.9421   1
   0   8   2 735.495 40.2798   1
   0   8  -2 745.095 41.6874   2
   0   8  -2 699.516 41.5025   1
   0   8   2 754.595 40.6280   1
   0   8   2 770.712 42.0007   2
   0   8  -2 677.973 39.9847   3
   0   8  -2 748.039 40.9565   1
   1  -8   2 415.848 23.9627   3
   1  -8   2 403.559 25.3820   1
   1  -8   2 420.991 26.0227   1
  -1  -8  -2 389.046 23.5854   1
  -1  -8  -2 436.182 24.7645   1
   1   8   2 445.874 25.7723   2
   1   8   2 378.433 22.1492   1
  -1   8  -2 415.914 25.0895   2
  -1   8  -2 409.564 25.1826   1
  -1   8  -2 426.261 23.9927   3
   1   8   2 408.537 22.2606   1
   2  -8   2 186.317 15.3316   1
   2  -8   2 213.360 16.1154   1
  -2  -8  -2 193.198 12.6034   1
  -2  -8  -2 185.870 14.3675   2
  -2  -8  -2 192.050 11.7140   3
  -2  -8  -2 197.122 13.3513   1
   2  -8   2 203.015 14.4063   3
  -2   8  -2 215.529 14.2646   3
  -2   8  -2 193.792 16.1434   1
  -2   8  -2 209.097 14.5889   2
  -2   8  -2 198.122 15.4306   1
   2   8   2 196.061 15.1496   2
   3  -8   2 2.33978 5.99147   1
  -3  -8  -2 0.69313 4.88761   2
   3  -8   2 5.02304 6.10014   1
  -3  -8  -2 8.39601 2.93145   1
  -3  -8  -2 8.37045 3.34023   1
  -3   8  -2 11.2732 5.44217   3
   3   8   2 13.2705 5.55744   2
  -3   8  -2 3.02628 5.67819   1
  -3   8  -2 8.75168 4.69472   2
  -3   8  -2 13.1216 6.87675   1
  -4  -8  -2 608.757 33.9124   1
  -4  -8  -2 615.275 37.1233   2
  -4  -8  -2 604.289 33.7419   1
   4  -8   2 663.257 38.7387   1
   4  -8   2 620.237 37.9603   3
   4  -8   2 625.224 38.3354   1
  -4  -8  -2 655.865 35.8091   3
  -4   8  -2 614.852 39.3035   1
   4   8   2 675.526 37.6591   2
  -4   8  -2 671.440 37.7387   3
  -4   8  -2 670.064 38.7296   1
  -5  -8  -2 2.74322 5.29502   3
  -5  -8  -2 -0.6609 2.19882   1
  -5  -8  -2 4.41818 2.31212   1
  -5  -8  -2 -2.5601 5.95099   2
   5  -8   2 10.2122 8.20086   1
   5  -8   2 -0.8720 7.17419   1
  -5   8  -2 -8.9730 7.78281   1
  -5   8  -2 7.33968 7.32846   1
   5   8   2 -9.0954 5.30261   2
  -5   8  -2 -5.8477 6.05771   3
  -6  -8  -2 400.535 22.3037   1
  -6  -8  -2 406.689 27.7652   2
  -6  -8  -2 445.888 27.2958   3
   6  -8   2 387.665 28.5285   1
  -6  -8  -2 402.216 22.0799   1
   6  -8   2 488.616 29.7789   1
  -6   8  -2 368.663 30.8834   1
  -6   8  -2 394.893 28.3530   1
  -6   8  -2 415.048 28.4129   3
  -7  -8  -2 195.540 15.8951   4
   7  -8   2 189.136 19.3015   1
   7  -8   2 187.812 21.0997   1
  -7  -8  -2 179.897 17.6321   2
  -7  -8  -2 179.727 16.9846   3
   7  -8   2 171.605 13.8226   4
  -7  -8  -2 173.888 11.6330   1
  -7   8  -2 206.875 20.4232   1
  -7   8  -2 226.047 20.2323   3
  -7   8  -2 171.333 22.2936   1
   8  -8   2 450.653 26.7763   4
   8  -8   2 519.133 33.1392   1
  -8  -8  -2 426.433 31.4947   2
   8  -8   2 467.407 34.3776   1
  -8  -8  -2 436.515 25.5371   1
  -8  -8  -2 451.448 31.6865   3
  -8  -8  -2 487.151 28.7888   4
  -8  -8  -2 428.394 25.7885   1
   8  -8   2 467.199 26.1362   4
  -8   8  -2 483.464 34.1229   3
  -8   8  -2 489.523 33.9211   1
  -9  -8  -2 119.362 15.5085   1
  -9  -8  -2 115.135 17.9652   2
  -9  -8  -2 116.134 13.2840   4
   9  -8   2 114.118 8.29944   4
  -9  -8  -2 129.443 20.1176   3
   9  -8   2 105.942 8.62146   4
   9  -8   2 96.5110 18.3104   1
  -9  -8  -2 115.399 11.1870   1
 -10  -8  -2 167.804 26.1401   2
  10  -8   2 168.421 22.0773   1
 -10  -8  -2 176.546 14.9672   1
  10  -8   2 149.723 22.5302   1
 -10  -8  -2 133.171 21.0194   3
 -10  -8  -2 179.407 14.2235   4
 -10   8  -2 118.531 20.4431   3
 -10   8  -2 119.521 20.7452   1
  11  -8   2 51.0090 15.0262   1
 -11  -8  -2 59.9569 17.0235   3
 -11   8  -2 33.3705 16.7996   1
 -11   8  -2 60.2836 17.4560   3
 -12  -8  -2 0.06001 18.2578   3
  12  -8   2 -13.287 14.5491   1
 -12   8  -2 21.3316 19.4228   1
 -12   8  -2 9.21144 20.1993   3
 -13  -8  -2 70.2845 25.0480   3
 -13   8  -2 52.0743 26.0643   1
 -13   8  -2 33.8938 26.2957   3
 -14  -9   2 133.992 30.3726   3
 -14   9   2 105.343 30.6644   1
 -14   9   2 180.274 32.4333   3
 -13  -9   2 43.1513 21.7175   3
  13  -9  -2 60.0855 19.6180   1
 -13   9   2 32.4379 20.8292   3
 -13   9   2 71.1807 21.3902   1
 -12  -9   2 176.874 19.0973   4
  12  -9  -2 95.3596 31.3268   1
 -12  -9   2 177.386 29.8212   3
 -12   9   2 164.627 28.1435   1
 -12   9   2 105.396 21.8225   3
 -11  -9   2 160.764 18.3635   4
  11  -9  -2 173.464 17.5754   4
 -11  -9   2 168.759 14.8879   1
  11  -9  -2 190.220 25.2780   1
 -11  -9   2 158.032 27.3587   3
 -11   9   2 146.328 23.8898   3
 -11   9   2 167.017 23.9496   1
 -10  -9   2 49.6237 8.49320   1
  10  -9  -2 87.6725 16.6879   1
 -10  -9   2 64.6812 11.1962   4
  10  -9  -2 67.9934 20.5213   1
 -10  -9   2 74.5856 16.5448   3
 -10  -9   2 63.8863 10.2002   1
  10  -9  -2 52.2948 10.0054   4
 -10   9   2 63.2404 15.8779   1
 -10   9   2 51.4393 15.7932   3
  -9  -9   2 161.896 16.4517   4
  -9  -9   2 132.503 18.8821   3
   9  -9  -2 175.265 20.7531   1
  -9  -9   2 138.217 10.1109   1
  -9  -9   2 134.672 11.5566   1
   9  -9  -2 155.751 15.0463   4
   9  -9  -2 205.407 23.1107   1
  -9   9   2 171.177 20.2847   1
  -9   9   2 126.356 20.4131   3
  -8  -9   2 171.846 16.6570   4
  -8  -9   2 165.822 11.1747   1
   8  -9  -2 162.110 20.6028   1
  -8  -9   2 126.958 22.1342   2
   8  -9  -2 154.496 14.9279   4
   8  -9  -2 178.879 22.1354   1
  -8   9   2 159.074 18.8614   3
  -8   9   2 165.879 19.1946   1
  -7  -9   2 10.1844 7.29411   4
  -7  -9   2 9.87178 3.24129   1
  -7  -9   2 25.8911 11.0166   2
  -7  -9   2 14.8068 3.70507   1
   7  -9  -2 12.4832 10.8581   1
   7  -9  -2 10.9971 10.0031   1
   7  -9  -2 11.1687 5.92395   4
  -7   9   2 6.97627 9.37450   1
  -7   9   2 18.8729 8.53842   3
  -7   9   2 -8.2940 10.1120   1
  -6  -9   2 19.3342 7.17344   4
   6  -9  -2 10.5320 8.29245   1
   6  -9  -2 17.1444 6.05743   4
   6  -9  -2 11.2213 9.64847   1
  -6  -9   2 15.2779 3.72721   1
  -6  -9   2 17.6251 8.97187   2
  -6  -9   2 19.7114 3.61612   1
  -6   9   2 21.5857 7.45915   3
  -6   9   2 14.1758 8.71569   1
  -6   9   2 35.5229 11.1793   1
  -5  -9   2 593.661 33.6308   1
  -5  -9   2 605.046 33.5175   1
   5  -9  -2 568.198 37.2919   1
  -5  -9   2 606.547 36.8630   4
  -5  -9   2 580.834 38.1060   2
   5  -9  -2 674.234 40.3858   1
  -5   9   2 662.760 38.2289   1
  -5   9   2 592.665 38.7174   1
   5   9  -2 655.555 37.8159   2
  -5   9   2 646.740 36.7053   3
  -4  -9   2 480.600 26.7034   1
   4  -9  -2 493.935 31.9071   1
   4  -9  -2 469.206 30.0110   1
  -4  -9   2 468.097 30.4217   2
  -4  -9   2 467.036 29.6938   4
   4   9  -2 458.093 29.8200   2
  -4   9   2 477.835 28.1018   3
  -4   9   2 474.810 30.1876   1
  -4   9   2 458.913 30.6564   1
  -3  -9   2 1225.28 66.1453   1
  -3  -9   2 1306.83 66.7985   1
  -3  -9   2 1228.36 68.7656   2
  -3  -9   2 1238.41 68.4706   4
   3  -9  -2 1188.05 68.1869   1
  -3  -9   2 1231.45 65.9027   3
   3  -9  -2 1321.48 70.4462   1
   3   9  -2 1303.63 68.8465   2
  -3   9   2 1205.55 68.9401   1
  -3   9   2 1323.18 68.6229   1
  -3   9   2 1174.30 67.2999   3
   2  -9  -2 227.782 18.2505   1
  -2  -9   2 240.417 14.7783   3
  -2  -9   2 253.396 18.0431   2
  -2  -9   2 253.336 16.1938   1
   2  -9  -2 237.835 18.9802   1
  -2  -9   2 256.929 16.9316   1
  -2  -9   2 235.533 17.9293   4
  -2   9   2 267.042 17.7200   1
   2   9  -2 242.896 14.6822   1
   2   9  -2 246.747 18.0857   2
  -2   9   2 227.580 14.3079   3
   2   9  -2 234.240 15.1526   1
   1  -9  -2 1288.79 72.0231   1
  -1  -9   2 1400.65 72.5525   1
  -1  -9   2 1323.88 73.4752   1
  -1  -9   2 1275.70 72.4602   2
  -1  -9   2 1296.89 70.0344   3
   1  -9  -2 1413.81 73.8087   1
  -1   9   2 1290.90 68.4934   3
  -1   9   2 1288.80 71.9940   1
  -1   9   2 1385.75 71.7457   1
   1   9  -2 1343.56 71.6900   1
   1   9  -2 1367.29 72.9964   2
   1   9  -2 1397.67 71.0985   1
  -1   9   2 1394.17 73.0685   2
   0  -9   2 153.527 12.8702   1
   0  -9  -2 158.519 12.4239   1
   0  -9  -2 192.391 14.3403   1
   0  -9   2 150.191 10.9831   3
   0  -9   2 162.207 13.2554   2
   0  -9   2 151.685 13.9728   1
   0   9  -2 180.498 13.9140   2
   0   9   2 174.420 14.0885   2
   0   9  -2 172.811 12.8747   1
   0   9  -2 149.957 13.5383   1
   0   9   2 160.223 11.9081   1
   0   9   2 151.258 11.5906   1
  -1  -9  -2 710.866 39.5841   1
   1  -9   2 773.706 42.4380   1
   1  -9   2 724.785 39.5585   3
  -1  -9  -2 803.089 41.0937   1
  -1   9  -2 732.889 41.1529   2
  -1   9  -2 722.796 40.8114   1
   1   9   2 687.816 37.8596   1
  -1   9  -2 641.477 41.3380   1
   1   9   2 730.273 41.6415   2
  -1   9  -2 735.647 39.5381   3
   1   9   2 663.797 37.7569   1
   2  -9   2 307.599 19.7888   3
  -2  -9  -2 283.160 20.2877   2
  -2  -9  -2 297.353 16.8713   3
   2  -9   2 305.836 21.3622   1
  -2  -9  -2 332.750 19.8434   1
   2  -9   2 301.716 21.8350   1
  -2  -9  -2 292.482 18.4656   1
   2   9   2 318.216 21.3978   2
  -2   9  -2 326.708 19.6586   3
  -2   9  -2 320.797 21.2721   1
  -2   9  -2 285.991 22.3181   1
  -2   9  -2 319.594 20.9282   2
  -3  -9  -2 446.764 27.5057   1
  -3  -9  -2 453.225 29.6218   2
  -3  -9  -2 444.028 26.9387   3
   3  -9   2 504.674 31.7677   1
   3  -9   2 463.927 30.7557   1
  -3  -9  -2 468.272 27.0542   1
   3  -9   2 403.405 31.3902   3
  -3   9  -2 508.473 32.0013   1
  -3   9  -2 580.641 31.7174   1
   3   9   2 561.896 31.0027   2
  -3   9  -2 576.839 30.3778   2
   4  -9   2 39.0148 9.32317   1
  -4  -9  -2 38.5569 5.30536   1
  -4  -9  -2 48.7286 8.41574   2
   4  -9   2 35.8485 8.47442   3
  -4  -9  -2 54.8320 7.53568   3
   4  -9   2 41.5207 10.2821   1
  -4  -9  -2 33.1206 5.50964   1
  -4   9  -2 51.7683 11.6111   1
  -4   9  -2 45.0106 7.92717   3
  -4   9  -2 52.6747 9.74550   1
  -4   9  -2 45.9120 8.08674   2
   4   9   2 45.0393 8.61402   2
  -5  -9  -2 31.4499 8.03233   2
  -5  -9  -2 26.2720 3.58556   1
   5  -9   2 19.2036 9.77905   1
  -5  -9  -2 19.5838 3.59731   1
  -5  -9  -2 24.7671 6.22142   3
   5  -9   2 15.7580 9.38015   1
  -5   9  -2 11.8297 7.23520   3
   5   9   2 14.9036 7.48497   2
  -5   9  -2 8.44197 8.24687   1
  -5   9  -2 -3.5049 8.87604   1
   6  -9   2 26.9002 10.6240   1
  -6  -9  -2 32.6044 9.37020   2
  -6  -9  -2 16.5155 3.12395   1
  -6  -9  -2 15.5040 7.19459   3
  -6  -9  -2 16.4842 3.45621   1
   6  -9   2 17.9069 10.5704   1
  -6   9  -2 9.84335 12.6417   1
  -6   9  -2 -1.2077 8.36202   3
  -6   9  -2 16.0325 9.45694   1
  -7  -9  -2 340.089 24.2750   3
  -7  -9  -2 321.256 17.9375   1
   7  -9   2 360.457 26.8883   1
   7  -9   2 294.918 21.2598   4
  -7  -9  -2 289.937 24.7489   2
   7  -9   2 328.643 28.1311   1
  -7  -9  -2 309.068 18.2814   1
  -7  -9  -2 323.463 22.9653   4
  -7   9  -2 385.543 27.8323   1
  -7   9  -2 313.501 25.9536   3
   8  -9   2 140.023 11.6913   4
  -8  -9  -2 104.154 17.3172   3
   8  -9   2 149.635 23.5122   1
  -8  -9  -2 113.066 9.27774   1
  -8  -9  -2 147.616 15.1022   4
  -8  -9  -2 121.155 9.58758   1
  -8  -9  -2 159.227 20.4034   2
   8  -9   2 114.470 18.9218   1
   8  -9   2 114.503 12.5051   4
  -8   9  -2 121.278 17.9309   3
  -8   9  -2 140.786 20.4439   1
  -9  -9  -2 81.0550 17.6786   2
   9  -9   2 98.8338 16.1376   4
   9  -9   2 121.115 10.3450   4
  -9  -9  -2 116.346 14.4025   4
  -9  -9  -2 93.4865 10.1803   1
   9  -9   2 123.887 19.8027   1
  -9  -9  -2 106.419 10.2716   1
  -9  -9  -2 112.573 19.3243   3
  -9   9  -2 52.3895 19.1271   3
  -9   9  -2 123.274 20.7462   1
  10  -9   2 218.573 25.0341   1
 -10  -9  -2 204.697 18.2444   4
 -10  -9  -2 220.812 24.1849   3
 -10  -9  -2 215.425 16.4284   1
 -10   9  -2 179.342 25.9368   1
 -10   9  -2 162.332 25.4083   3
  11  -9   2 -18.153 16.4370   1
 -11  -9  -2 40.2578 16.4392   3
 -11   9  -2 -10.116 15.7832   1
 -11   9  -2 8.12358 16.4237   3
 -12  -9  -2 51.7680 20.6070   3
  12  -9   2 79.2485 18.7294   1
 -12   9  -2 88.5820 22.1975   1
 -13 -10   2 56.6929 24.6046   3
  13 -10  -2 96.8136 22.5468   1
 -13  10   2 81.3619 22.6772   3
 -13  10   2 93.7828 23.8142   1
 -12 -10   2 42.6900 20.0923   3
  12 -10  -2 17.0900 18.8966   1
 -12 -10   2 43.6032 11.7892   4
 -12  10   2 30.9310 18.8824   1
 -12  10   2 71.9836 18.8526   3
  11 -10  -2 199.440 27.7230   1
 -11 -10   2 174.565 19.1819   4
 -11 -10   2 128.747 27.6406   3
 -11  10   2 155.382 26.4022   1
 -11  10   2 158.667 24.5364   3
 -10 -10   2 191.293 23.8099   3
 -10 -10   2 199.886 18.8151   4
 -10 -10   2 140.573 11.5897   1
 -10 -10   2 137.515 12.8710   1
  10 -10  -2 184.887 18.0835   4
  10 -10  -2 166.096 28.9679   1
 -10  10   2 150.273 23.7054   1
 -10  10   2 164.481 26.0282   3
  -9 -10   2 11.7103 3.84077   1
   9 -10  -2 14.3308 14.3999   1
  -9 -10   2 19.6537 5.21407   1
  -9 -10   2 13.3954 11.4496   3
  -9 -10   2 -0.8333 8.68761   4
   9 -10  -2 2.32439 8.38186   4
  -9  10   2 7.91493 12.3865   3
   8 -10  -2 103.039 13.9076   4
   8 -10  -2 123.354 21.5278   1
  -8 -10   2 93.8241 18.0008   2
  -8 -10   2 108.877 8.95429   1
  -8 -10   2 104.103 8.06699   1
   8 -10  -2 100.619 16.5531   1
  -8 -10   2 104.325 14.9080   4
  -8  10   2 117.667 17.6554   1
  -8  10   2 143.749 19.1215   3
  -7 -10   2 61.9212 6.37612   1
   7 -10  -2 60.3107 14.8606   1
   7 -10  -2 54.1080 9.24343   4
   7 -10  -2 45.8331 12.7497   1
  -7 -10   2 72.8722 11.9046   4
  -7 -10   2 53.8720 6.92970   1
  -7 -10   2 70.5870 13.9860   2
  -7  10   2 40.9655 11.5362   1
  -7  10   2 39.4184 10.7204   3
  -6 -10   2 111.981 9.16578   1
   6 -10  -2 128.547 17.5973   1
   6 -10  -2 117.132 16.6056   1
  -6 -10   2 117.672 9.29165   1
  -6 -10   2 110.247 13.7230   4
  -6 -10   2 107.268 15.5715   2
  -6  10   2 113.366 15.3125   1
  -6  10   2 118.383 16.9492   1
  -6  10   2 108.428 13.9100   3
  -5 -10   2 126.921 15.3941   2
  -5 -10   2 109.460 9.69003   1
  -5 -10   2 133.094 14.0162   4
   5 -10  -2 130.590 15.8070   1
   5 -10  -2 149.684 17.3497   1
  -5  10   2 124.534 14.6507   1
   5  10  -2 135.968 14.4857   2
  -5  10   2 127.941 13.0021   3
  -5  10   2 127.865 16.4789   1
  -4 -10   2 761.529 44.7419   4
   4 -10  -2 802.116 47.1563   1
   4 -10  -2 701.281 44.4267   1
  -4 -10   2 728.912 41.8016   3
  -4 -10   2 762.309 45.4345   2
  -4 -10   2 752.732 41.5528   1
  -4 -10   2 790.309 42.2210   1
  -4  10   2 733.761 45.5176   1
  -4  10   2 794.135 45.0005   1
  -4  10   2 777.672 42.6351   3
   4  10  -2 770.272 45.0742   2
  -3 -10   2 13.1476 7.43387   2
   3 -10  -2 20.0610 7.70599   1
   3 -10  -2 25.9319 9.38600   1
  -3 -10   2 25.1771 5.43870   1
  -3 -10   2 20.6888 7.21596   4
  -3 -10   2 22.7676 5.98360   1
  -3 -10   2 28.9644 4.51986   3
   3  10  -2 32.9208 8.12026   2
  -3  10   2 28.5474 7.83035   1
  -3  10   2 30.3896 8.84767   1
   2 -10  -2 745.154 43.5707   1
  -2 -10   2 695.490 38.3875   3
  -2 -10   2 673.306 41.7861   2
  -2 -10   2 760.720 41.0228   1
   2 -10  -2 700.938 41.4808   1
  -2 -10   2 648.889 43.7350   1
  -2 -10   2 722.374 42.1647   4
  -2  10   2 755.669 41.4081   1
   2  10  -2 736.315 42.5308   2
   2  10  -2 709.458 38.9829   1
  -2  10   2 782.827 42.4696   2
  -2  10   2 680.639 37.8574   3
  -2  10   2 696.344 41.7305   1
  -1 -10   2 650.113 39.5256   2
   1 -10  -2 716.154 41.0682   1
   1 -10  -2 666.766 39.0536   1
  -1 -10   2 701.046 39.5400   1
  -1 -10   2 654.921 36.5150   3
  -1 -10   2 655.448 38.6847   1
  -1  10   2 703.720 38.6114   1
  -1  10   2 700.897 40.2421   2
  -1  10   2 684.852 39.0166   1
   1  10  -2 676.112 39.9897   2
   1  10  -2 685.967 37.7837   1
   1  10  -2 658.158 38.4947   1
   0 -10   2 558.430 31.6164   3
   0 -10  -2 535.795 33.0873   1
   0 -10  -2 596.680 34.9579   1
   0 -10   2 535.218 33.7229   1
   0 -10   2 602.655 34.7780   1
   0  10   2 568.561 32.5132   1
   0  10  -2 500.317 34.1618   1
   0  10  -2 583.900 33.3164   1
   0  10   2 626.209 35.2377   2
   0  10   2 589.836 32.2486   1
   0  10  -2 614.105 34.8866   2
  -1 -10  -2 206.341 14.0850   1
  -1 -10  -2 207.725 15.6531   1
   1 -10   2 170.888 13.3790   3
   1 -10   2 200.376 16.6025   1
   1 -10   2 185.599 16.1936   1
  -1  10  -2 200.576 15.8530   2
   1  10   2 183.288 11.5617   1
   1  10   2 185.131 11.6428   1
  -1  10  -2 182.834 16.9140   1
   1  10   2 190.416 16.1325   2
  -1  10  -2 191.288 13.6088   3
  -1  10  -2 210.774 15.2328   1
  -2 -10  -2 928.424 52.0535   1
   2 -10   2 930.604 54.7569   1
  -2 -10  -2 1002.71 53.3618   1
   2 -10   2 904.815 52.8789   3
   2 -10   2 1003.17 55.9039   1
  -2 -10  -2 893.805 49.6686   3
  -2  10  -2 1016.91 54.6992   1
  -2  10  -2 1005.79 54.3805   2
  -2  10  -2 1050.31 52.9564   3
   2  10   2 983.331 54.9895   2
  -2  10  -2 930.572 55.4191   1
  -3 -10  -2 437.587 28.4146   2
  -3 -10  -2 440.628 25.6753   1
  -3 -10  -2 467.301 27.3904   1
  -3 -10  -2 449.290 24.8315   3
   3 -10   2 419.681 29.8888   1
   3 -10   2 436.671 28.2914   3
   3 -10   2 511.179 30.7899   1
  -3  10  -2 453.812 29.5106   1
  -3  10  -2 460.929 27.8232   3
  -3  10  -2 428.264 30.4775   1
   3  10   2 451.285 29.3688   2
  -3  10  -2 452.463 28.3804   2
  -4 -10  -2 46.2567 6.30773   1
   4 -10   2 38.9577 10.9678   1
   4 -10   2 52.7131 9.37090   3
  -4 -10  -2 36.5403 5.79503   1
  -4 -10  -2 51.8894 7.60187   3
   4 -10   2 35.1923 10.2062   1
  -4 -10  -2 41.6823 9.59187   2
  -4  10  -2 74.7457 10.1412   3
  -4  10  -2 68.7957 12.9598   1
   4  10   2 75.3174 11.6030   2
  -4  10  -2 51.9379 10.2021   1
  -4  10  -2 50.7150 8.86535   2
  -5 -10  -2 117.950 8.95948   1
  -5 -10  -2 116.135 9.22189   1
  -5 -10  -2 126.544 14.7166   2
   5 -10   2 128.017 16.9672   1
   5 -10   2 122.997 16.8911   1
  -5  10  -2 120.150 17.5429   1
   5  10   2 107.683 14.0077   2
  -5  10  -2 118.917 16.3884   1
  -5  10  -2 121.397 14.6944   3
  -5  10  -2 113.152 13.5436   2
  -6 -10  -2 82.2787 13.8836   2
   6 -10   2 106.268 17.0958   1
  -6 -10  -2 89.1583 11.9348   3
  -6 -10  -2 83.3405 7.24958   1
   6 -10   2 63.6812 14.1351   1
  -6 -10  -2 89.9874 7.60219   1
  -6  10  -2 103.994 15.4274   1
  -6  10  -2 92.5697 14.3863   3
   6  10   2 90.5517 13.7811   2
  -7 -10  -2 93.4211 7.49672   1
   7 -10   2 65.9130 15.8374   1
   7 -10   2 74.4617 14.9838   1
  -7 -10  -2 82.1671 13.9732   2
  -7 -10  -2 77.2929 11.7571   4
   7 -10   2 71.2381 10.4475   4
  -7 -10  -2 75.2917 6.67472   1
  -7 -10  -2 83.8803 14.0262   3
  -7  10  -2 99.4164 15.6187   1
  -7  10  -2 74.3579 14.1388   3
  -8 -10  -2 192.711 18.7801   4
   8 -10   2 164.659 17.6784   4
   8 -10   2 177.981 16.4880   4
  -8 -10  -2 183.276 12.2395   1
  -8 -10  -2 194.525 23.9499   2
   8 -10   2 167.790 22.6850   1
  -8 -10  -2 215.934 20.9746   3
  -8  10  -2 187.873 31.8373   1
  -8  10  -2 177.964 21.5969   3
   9 -10   2 87.8265 11.3991   4
  -9 -10  -2 145.358 20.2494   3
  -9 -10  -2 99.3219 9.45276   1
  -9 -10  -2 106.187 16.3831   4
  -9 -10  -2 78.5535 9.48445   1
   9 -10   2 87.6415 12.4376   4
  -9  10  -2 114.816 19.4407   1
  -9  10  -2 94.5878 17.7422   3
  10 -10   2 138.013 23.6818   1
 -10 -10  -2 154.254 23.5310   3
 -10 -10  -2 119.607 17.4330   4
 -10  10  -2 122.648 20.8774   3
 -10  10  -2 150.989 23.6595   1
 -11 -10  -2 37.3110 17.6670   3
  11 -10   2 14.7142 17.9200   1
 -11  10  -2 48.6616 18.9429   1
 -11  10  -2 23.6812 17.8315   3
  12 -10   2 32.4449 18.4702   1
 -12 -10  -2 -10.918 20.1310   3
 -12  10  -2 22.1505 22.0104   1
 -12  10  -2 -9.1285 21.1688   3
  13 -11  -2 23.5240 22.5016   1
 -13 -11   2 41.0608 23.3883   3
 -13  11   2 36.0640 22.7699   1
 -13  11   2 6.50019 22.7222   3
 -12 -11   2 144.357 21.2762   4
  12 -11  -2 103.712 23.1938   1
 -12 -11   2 95.5189 23.0388   3
 -12  11   2 119.770 22.6914   1
 -12  11   2 90.7046 20.8842   3
  11 -11  -2 62.3218 19.2081   1
 -11 -11   2 24.8067 11.3725   4
 -11 -11   2 5.32360 20.2048   3
 -11  11   2 32.5468 17.0803   1
 -11  11   2 38.0384 16.3597   3
 -10 -11   2 140.145 12.1897   1
 -10 -11   2 134.239 10.9667   1
  10 -11  -2 126.571 19.1257   4
 -10 -11   2 158.190 23.9406   3
 -10 -11   2 179.457 19.7923   4
  10 -11  -2 157.721 23.7877   1
 -10  11   2 185.466 23.6225   1
  -9 -11   2 70.5118 8.83206   1
   9 -11  -2 86.1381 22.3061   1
   9 -11  -2 63.6555 11.7886   4
  -9 -11   2 73.7733 13.0705   4
  -9 -11   2 61.4133 14.5640   3
  -9  11   2 74.8138 15.3616   3
  -9  11   2 75.0956 15.9925   1
  -8 -11   2 180.542 19.7321   3
   8 -11  -2 193.351 25.1654   1
  -8 -11   2 182.780 12.8212   1
  -8 -11   2 189.084 18.2591   4
   8 -11  -2 176.876 17.3120   4
  -8 -11   2 189.757 12.0874   1
  -8  11   2 148.941 21.8422   1
  -8  11   2 185.456 21.7509   3
   7 -11  -2 18.2997 14.0477   1
   7 -11  -2 -0.6847 11.7205   1
  -7 -11   2 14.2125 4.44703   1
  -7 -11   2 32.3214 13.4736   2
   7 -11  -2 13.3003 7.68987   4
  -7 -11   2 13.7751 8.63236   4
  -7 -11   2 11.6312 4.55331   1
  -7  11   2 20.3494 9.17915   3
  -7  11   2 27.4095 10.9007   1
  -6 -11   2 71.0173 11.9818   4
   6 -11  -2 110.845 19.0296   1
   6 -11  -2 96.3925 15.8706   1
  -6 -11   2 88.3530 8.88298   1
  -6 -11   2 73.8439 13.8848   2
  -6  11   2 75.9608 13.2556   3
  -6  11   2 72.4421 12.7888   1
   6  11  -2 74.9712 12.6695   2
  -6  11   2 93.0745 16.1267   1
  -5 -11   2 444.813 30.5350   4
  -5 -11   2 422.027 31.0074   2
  -5 -11   2 417.893 25.9588   1
  -5 -11   2 464.939 26.8399   1
   5 -11  -2 441.161 32.7812   1
   5 -11  -2 404.655 30.3239   1
  -5  11   2 465.989 32.2060   1
   5  11  -2 476.420 30.6591   2
  -5  11   2 475.161 31.3106   1
  -5  11   2 477.957 28.5050   3
  -4 -11   2 168.631 13.7290   1
  -4 -11   2 166.752 12.8272   1
  -4 -11   2 151.904 16.3396   4
   4 -11  -2 181.882 19.2156   1
  -4 -11   2 157.631 12.5141   3
  -4 -11   2 156.551 17.0601   2
   4 -11  -2 168.444 17.5310   1
  -4  11   2 168.826 13.6620   3
  -4  11   2 172.761 17.8729   1
   4  11  -2 189.577 16.7399   2
  -4  11   2 165.592 16.2094   1
  -3 -11   2 663.325 37.7000   3
   3 -11  -2 728.681 43.8690   1
  -3 -11   2 655.576 41.6993   4
  -3 -11   2 683.597 42.0927   2
   3 -11  -2 658.306 41.3193   1
  -3 -11   2 727.414 40.0749   1
  -3  11   2 701.021 42.3520   1
  -3  11   2 748.484 41.7966   1
   3  11  -2 701.361 42.0349   2
  -2 -11   2 127.549 14.1166   2
   2 -11  -2 121.552 13.9846   1
   2 -11  -2 144.597 15.6478   1
  -2 -11   2 128.451 9.20457   3
  -2 -11   2 125.660 12.0976   1
  -2 -11   2 124.527 14.1387   4
  -2 -11   2 120.412 12.9291   1
   2  11  -2 129.053 10.4106   1
  -2  11   2 133.809 13.1396   1
  -2  11   2 132.432 14.1976   2
  -2  11   2 120.355 8.25909   3
  -2  11   2 133.054 14.2149   1
   2  11  -2 123.661 13.9828   2
   1 -11  -2 367.979 25.2813   1
  -1 -11   2 387.696 26.1070   2
   1 -11  -2 406.545 27.8488   1
  -1 -11   2 404.367 26.1129   1
  -1 -11   2 381.772 25.2121   1
  -1 -11   2 375.217 22.2231   3
   1  11  -2 382.555 26.4385   2
   1  11  -2 422.465 23.9968   1
   1  11  -2 401.338 24.9219   1
  -1  11   2 415.597 24.9566   1
  -1  11   2 423.130 26.9373   2
  -1  11   2 372.732 26.1538   1
   0 -11   2 463.140 27.1731   3
   0 -11  -2 521.515 31.5375   1
   0 -11  -2 454.722 29.1823   1
   0 -11   2 489.848 31.1406   1
   0 -11   2 491.488 30.4199   1
   0  11   2 505.477 28.0154   1
   0  11  -2 497.980 29.4054   1
   0  11  -2 487.093 30.7550   2
   0  11   2 463.124 28.2087   1
   0  11  -2 453.363 30.3776   1
   0  11   2 489.557 31.0997   2
   1 -11   2 458.899 27.5902   3
   1 -11   2 432.190 29.9352   1
   1 -11   2 488.645 31.1701   1
  -1 -11  -2 482.107 28.5904   1
  -1 -11  -2 542.022 30.6891   1
   1  11   2 492.155 30.9316   2
  -1  11  -2 500.829 27.7208   3
   1  11   2 462.089 25.8726   1
  -1  11  -2 441.398 30.3809   1
   1  11   2 443.721 25.7483   1
  -1  11  -2 465.419 29.2984   1
  -1  11  -2 512.810 30.6752   2
  -2 -11  -2 299.483 19.5132   1
   2 -11   2 294.101 21.2674   1
  -2 -11  -2 242.607 17.5751   1
   2 -11   2 256.253 21.2129   1
   2 -11   2 256.627 18.2038   3
  -2  11  -2 265.157 20.2001   1
  -2  11  -2 281.886 17.9024   3
   2  11   2 250.582 20.6712   2
  -2  11  -2 238.402 21.0533   1
  -2  11  -2 255.297 19.7542   2
   3 -11   2 226.928 19.7865   1
  -3 -11  -2 195.255 12.3046   3
   3 -11   2 170.678 16.4327   3
  -3 -11  -2 210.258 16.0791   1
  -3 -11  -2 224.375 17.9058   2
   3 -11   2 207.704 19.0335   1
  -3 -11  -2 183.350 14.3678   1
  -3  11  -2 202.092 20.0136   1
  -3  11  -2 231.486 18.9187   1
  -3  11  -2 239.093 17.8861   2
   3  11   2 227.083 18.9674   2
  -4 -11  -2 101.592 15.3710   2
  -4 -11  -2 109.978 11.2317   1
  -4 -11  -2 82.0934 8.89409   1
   4 -11   2 86.7264 14.1873   1
   4 -11   2 76.4341 13.5282   1
  -4 -11  -2 107.397 9.13108   3
  -4  11  -2 119.467 18.6028   1
  -4  11  -2 84.0125 11.5388   3
   4  11   2 90.1908 14.7895   2
  -4  11  -2 89.4054 12.3456   2
  -4  11  -2 91.9262 13.7753   1
   5 -11   2 88.0319 14.8084   1
  -5 -11  -2 77.3839 13.0661   2
  -5 -11  -2 87.9933 8.92831   1
   5 -11   2 81.0915 14.9835   1
  -5 -11  -2 96.4664 9.55620   1
  -5  11  -2 126.367 14.9755   3
  -5  11  -2 132.644 21.4745   1
  -5  11  -2 113.447 16.6504   1
   5  11   2 121.836 14.9103   2
  -5  11  -2 124.593 14.7579   2
   6 -11   2 95.3637 16.0425   1
  -6 -11  -2 85.3840 8.28227   1
   6 -11   2 77.4061 16.3208   1
  -6 -11  -2 78.9099 8.67218   1
  -6 -11  -2 88.3015 14.3763   2
  -6 -11  -2 108.011 12.9050   3
  -6  11  -2 88.7239 14.7471   3
  -6  11  -2 121.508 16.6909   1
   6  11   2 133.985 15.8085   2
  -6  11  -2 101.968 14.3604   2
   7 -11   2 64.5644 10.5950   4
  -7 -11  -2 88.2156 14.7856   3
  -7 -11  -2 65.4444 7.66318   1
  -7 -11  -2 77.9416 12.6470   4
   7 -11   2 75.6277 15.6538   1
  -7 -11  -2 69.2027 7.07003   1
  -7 -11  -2 53.6292 13.8682   2
  -7  11  -2 72.1304 13.4321   3
  -7  11  -2 81.9841 16.7164   1
  -8 -11  -2 78.9908 8.57751   1
  -8 -11  -2 89.6431 13.6765   4
   8 -11   2 75.0267 11.4269   4
  -8 -11  -2 93.1206 13.9537   3
  -8  11  -2 112.226 17.0196   3
  -8  11  -2 116.343 18.9020   1
   9 -11   2 91.0664 17.3821   1
  -9 -11  -2 94.7535 9.63985   1
  -9 -11  -2 90.4790 13.6469   4
   9 -11   2 78.8207 11.5771   4
  -9 -11  -2 148.539 20.4832   3
  -9  11  -2 69.4429 17.5143   1
  -9  11  -2 109.129 18.4572   3
  10 -11   2 54.9796 17.3472   1
 -10 -11  -2 36.5173 12.1857   4
 -10 -11  -2 59.8518 17.0810   3
 -10  11  -2 60.2016 16.7405   3
 -10  11  -2 37.2768 16.5660   1
 -11 -11  -2 36.8425 17.4844   3
  11 -11   2 8.83550 18.6959   1
 -11  11  -2 29.1165 20.4500   1
 -11  11  -2 34.2648 19.3604   3
 -12 -11  -2 -25.596 20.4040   3
  12 -11   2 37.0190 20.8767   1
 -12  11  -2 15.0796 22.9018   3
 -12  11  -2 27.8877 24.5592   1
  13 -12  -2 0.99583 23.6073   1
 -13 -12   2 33.6719 24.5143   3
 -13  12   2 -6.9349 23.4024   3
 -13  12   2 -0.7888 24.9431   1
 -12 -12   2 17.4559 20.2428   3
  12 -12  -2 36.6741 22.5030   1
 -12 -12   2 29.3800 14.4507   4
 -12  12   2 18.6480 20.4159   1
 -12  12   2 15.3811 19.1385   3
 -11 -12   2 200.646 23.3061   4
 -11 -12   2 178.484 30.4021   3
  11 -12  -2 261.894 32.3855   1
 -11  12   2 202.206 29.7631   3
 -11  12   2 164.165 27.7460   1
  10 -12  -2 57.2370 13.6145   4
  10 -12  -2 49.6948 19.9729   1
 -10 -12   2 69.0672 8.21336   1
 -10 -12   2 102.863 17.7062   3
 -10 -12   2 79.8709 14.3433   4
 -10  12   2 81.2441 17.8178   1
 -10  12   2 80.3664 26.6698   3
  -9 -12   2 290.459 26.0227   3
  -9 -12   2 231.673 15.7083   1
   9 -12  -2 277.276 31.1202   1
  -9 -12   2 261.288 16.7696   1
   9 -12  -2 222.852 22.6503   4
  -9 -12   2 303.582 24.4348   4
  -9  12   2 277.049 25.7506   3
  -9  12   2 230.249 27.9248   1
  -8 -12   2 146.903 12.2477   1
   8 -12  -2 142.580 18.5379   4
  -8 -12   2 152.899 11.5658   1
   8 -12  -2 166.611 28.5897   1
  -8 -12   2 137.445 18.7480   3
  -8 -12   2 207.797 18.9969   4
  -8  12   2 198.365 21.7331   3
  -7 -12   2 264.488 22.1584   4
   7 -12  -2 223.870 20.6648   4
  -7 -12   2 254.141 16.6314   1
   7 -12  -2 252.477 26.4312   1
  -7  12   2 252.834 22.3666   3
  -7  12   2 268.723 23.9744   1
   6 -12  -2 119.506 20.1591   1
  -6 -12   2 104.771 17.0164   2
  -6 -12   2 107.571 11.1555   1
  -6 -12   2 133.979 12.0268   1
  -6 -12   2 134.533 17.7762   4
   6  12  -2 143.483 17.0359   2
  -6  12   2 132.035 15.4052   3
  -6  12   2 141.128 20.2509   1
  -6  12   2 140.082 17.5725   1
   5 -12  -2 2.06921 11.6664   1
  -5 -12   2 20.6495 5.75563   3
  -5 -12   2 9.11495 10.1173   2
  -5 -12   2 7.48430 8.68271   4
  -5 -12   2 3.50092 5.37668   1
  -5 -12   2 12.4108 5.85198   1
  -5  12   2 5.85920 11.2454   1
   5  12  -2 2.54950 7.78969   2
  -5  12   2 14.4132 6.98936   3
  -5  12   2 -10.111 8.69486   1
  -4 -12   2 83.6107 12.1869   1
  -4 -12   2 98.1251 8.87256   3
   4 -12  -2 111.497 16.9013   1
  -4 -12   2 62.1014 12.3146   4
   4 -12  -2 59.2369 12.6907   1
  -4 -12   2 71.4430 10.6798   1
  -4 -12   2 106.380 15.4485   2
  -4  12   2 98.1465 13.7363   1
  -4  12   2 89.3323 10.0380   3
  -4  12   2 66.0965 13.2327   1
   4  12  -2 61.1876 11.8833   2
   3 -12  -2 10.2580 8.39583   1
  -3 -12   2 11.8426 6.05164   1
  -3 -12   2 5.99817 6.50789   1
  -3 -12   2 13.7306 3.99286   3
  -3 -12   2 14.3738 8.56287   4
   3 -12  -2 20.6779 10.6965   1
  -3 -12   2 17.1645 9.21860   2
   3  12  -2 12.8520 7.82269   2
  -3  12   2 12.6020 10.9822   2
  -3  12   2 8.78114 7.58968   1
  -3  12   2 23.1176 9.39437   1
   2 -12  -2 7.51286 9.71548   1
  -2 -12   2 22.2246 8.33549   4
  -2 -12   2 28.6238 7.81557   1
  -2 -12   2 25.5198 8.82025   2
  -2 -12   2 14.9839 6.72114   1
  -2 -12   2 20.3445 3.99384   3
   2 -12  -2 26.1602 8.88829   1
   2  12  -2 33.9547 5.93988   1
   2  12  -2 25.5194 8.81942   2
  -2  12   2 27.5751 8.90230   1
   2  12  -2 33.7891 5.61742   1
  -2  12   2 29.3957 8.67119   2
  -2  12   2 27.7136 3.43065   3
  -2  12   2 27.6204 8.00617   1
  -1 -12   2 218.466 18.4684   1
  -1 -12   2 240.896 19.2846   1
   1 -12  -2 248.783 19.0430   1
  -1 -12   2 243.489 19.6156   2
  -1 -12   2 231.640 14.5022   3
   1 -12  -2 258.580 21.6987   1
  -1  12   2 237.016 17.6949   1
   1  12  -2 241.369 16.6596   1
   1  12  -2 214.978 17.5343   1
  -1  12   2 222.117 21.2486   1
  -1  12   2 236.149 19.7405   2
   1  12  -2 234.977 19.4816   2
   0 -12  -2 6.01895 7.92000   1
   0 -12   2 1.85897 3.88676   3
   0 -12   2 -1.3420 7.25107   1
   0 -12   2 11.1551 8.06408   1
   0 -12  -2 10.2245 6.71096   1
   0  12   2 -10.572 6.73263   2
   0  12   2 2.02067 4.58219   1
   0  12  -2 10.0330 6.97541   2
   0  12  -2 -0.8636 5.44231   1
   0  12  -2 4.04263 6.98046   1
   0  12   2 -4.5852 4.86482   1
   1 -12   2 196.951 14.6857   3
  -1 -12  -2 190.146 16.0672   1
  -1 -12  -2 239.773 18.7388   1
   1 -12   2 198.461 18.7984   1
   1 -12   2 207.429 18.9298   1
   1  12   2 227.407 19.1222   2
  -1  12  -2 210.745 18.1547   2
  -1  12  -2 205.082 17.1744   1
  -1  12  -2 186.208 19.0317   1
   1  12   2 207.264 12.6084   1
  -1  12  -2 216.744 14.9082   3
   1  12   2 204.341 12.5835   1
   2 -12   2 446.723 30.7707   1
   2 -12   2 396.989 26.8277   3
  -2 -12  -2 475.327 28.7712   1
   2 -12   2 417.732 29.7629   1
  -2 -12  -2 435.179 26.8054   1
  -2  12  -2 391.003 30.7159   1
  -2  12  -2 456.808 29.3614   2
  -2  12  -2 442.880 29.3518   1
  -2  12  -2 453.692 26.6240   3
   2  12   2 454.534 30.1297   2
  -3 -12  -2 62.0655 9.24982   1
  -3 -12  -2 47.4856 3.79018   3
   3 -12   2 54.1334 12.0669   1
   3 -12   2 55.2705 12.7737   1
  -3 -12  -2 47.5890 10.4613   2
  -3 -12  -2 52.2630 11.8258   1
  -3  12  -2 45.8525 10.1034   1
  -3  12  -2 45.9053 10.2275   2
   3  12   2 33.9554 10.5522   2
  -3  12  -2 43.5463 8.02088   3
  -3  12  -2 37.9343 11.5236   1
  -4 -12  -2 352.643 27.6423   2
   4 -12   2 425.053 29.4135   1
  -4 -12  -2 363.049 22.9136   1
  -4 -12  -2 382.468 24.4132   1
  -4 -12  -2 334.776 24.0322   3
   4  12   2 389.417 27.9084   2
  -4  12  -2 387.919 27.7582   1
  -4  12  -2 389.235 27.0856   2
  -4  12  -2 405.774 25.8363   3
  -4  12  -2 351.537 31.0757   1
   5 -12   2 52.5361 13.2472   1
  -5 -12  -2 69.0515 10.7382   1
  -5 -12  -2 79.2922 13.8004   2
  -5 -12  -2 67.1813 9.33692   3
   5 -12   2 53.0882 17.5570   1
  -5 -12  -2 62.7637 8.79018   1
  -5  12  -2 59.4418 16.5415   1
   5  12   2 82.6754 13.1896   2
  -5  12  -2 79.7486 14.0084   1
  -5  12  -2 58.1945 11.2418   3
  -5  12  -2 56.7675 11.6793   2
  -6 -12  -2 211.689 23.0652   2
   6 -12   2 239.395 24.2879   1
  -6 -12  -2 214.328 16.3511   1
  -6 -12  -2 265.637 18.4921   3
  -6 -12  -2 225.871 15.4828   1
  -6  12  -2 256.000 22.8371   3
   6  12   2 280.455 22.5323   2
  -6  12  -2 239.144 21.4678   2
  -6  12  -2 240.708 22.9342   1
  -7 -12  -2 98.3151 10.7656   1
  -7 -12  -2 138.622 15.9409   3
   7 -12   2 116.301 16.3894   4
  -7 -12  -2 121.763 10.1033   1
  -7 -12  -2 126.027 18.2999   4
  -7  12  -2 145.213 17.7818   2
  -7  12  -2 128.402 21.1264   1
  -7  12  -2 137.417 19.6899   3
  -8 -12  -2 40.4593 11.8014   3
  -8 -12  -2 39.9734 6.13264   1
   8 -12   2 34.4593 10.6874   4
   8 -12   2 34.4270 15.0140   1
  -8 -12  -2 41.6983 12.5735   4
  -8 -12  -2 32.0402 5.59718   1
  -8  12  -2 30.2668 13.6757   3
  -8  12  -2 9.38732 12.9150   1
  -8  12  -2 28.5093 11.5757   2
   9 -12   2 29.6022 10.5433   4
  -9 -12  -2 46.2797 12.6845   4
   9 -12   2 24.0341 16.0205   1
  -9 -12  -2 43.4465 13.6868   3
  -9  12  -2 32.9607 15.4515   3
  -9  12  -2 9.50251 14.4127   1
 -10 -12  -2 30.1751 12.8673   4
  10 -12   2 16.0298 17.1655   1
 -10 -12  -2 63.0026 16.3107   3
 -10  12  -2 40.7488 17.0673   3
 -10  12  -2 19.0487 17.3255   1
 -11 -12  -2 6.34361 19.3789   3
  11 -12   2 54.8416 21.0816   1
 -11  12  -2 50.8865 21.5567   1
 -11  12  -2 23.4018 20.9164   3
  12 -13  -2 25.1871 23.0572   1
 -12 -13   2 6.87699 15.7809   4
 -12 -13   2 23.0875 24.1639   3
 -12  13   2 35.6297 20.2480   3
 -12  13   2 7.06009 22.1731   1
 -11 -13   2 13.8918 21.0430   3
  11 -13  -2 55.8248 21.3071   1
 -11  13   2 -4.8500 17.9941   1
 -11  13   2 21.9614 16.6057   3
  10 -13  -2 75.9611 21.4836   1
 -10 -13   2 108.716 17.8427   3
 -10 -13   2 85.2138 16.4512   4
 -10  13   2 94.4034 20.0227   1
 -10  13   2 85.6281 18.9377   3
  -9 -13   2 89.0677 16.4272   4
   9 -13  -2 105.262 16.2972   4
  -9 -13   2 119.314 10.3961   1
   9 -13  -2 118.585 22.6887   1
  -9 -13   2 121.564 17.3266   3
  -9 -13   2 94.6320 11.2724   1
  -9  13   2 116.565 20.0928   1
  -9  13   2 147.291 22.0199   3
   8 -13  -2 98.3177 14.5818   4
  -8 -13   2 87.1321 11.3885   1
  -8 -13   2 97.8047 15.5245   4
  -8 -13   2 70.5240 10.4356   1
   8 -13  -2 136.704 22.6940   1
  -8 -13   2 75.6929 13.6757   3
  -8  13   2 89.5873 17.0525   1
  -8  13   2 75.8570 15.3325   3
  -7 -13   2 257.678 17.0074   1
   7 -13  -2 281.105 31.2734   1
  -7 -13   2 258.613 23.3807   4
  -7 -13   2 210.347 16.4409   1
   7 -13  -2 199.398 20.3047   4
  -7 -13   2 194.052 20.0231   3
  -7  13   2 256.771 22.2511   3
  -7  13   2 208.796 26.6016   1
   6 -13  -2 394.325 31.7968   1
  -6 -13   2 358.561 26.0028   1
  -6 -13   2 356.799 23.1039   1
  -6 -13   2 397.986 28.3237   4
  -6  13   2 351.515 25.8130   3
   6  13  -2 349.656 28.0505   2
  -6  13   2 308.112 27.7471   1
  -5 -13   2 181.812 13.8013   3
  -5 -13   2 113.302 17.9142   2
  -5 -13   2 196.466 15.2633   1
  -5 -13   2 174.799 18.7657   4
   5 -13  -2 173.168 22.1120   1
  -5 -13   2 163.451 14.3293   1
  -5  13   2 150.992 19.6118   1
  -5  13   2 134.206 20.8793   1
  -5  13   2 160.644 15.2706   3
   5  13  -2 141.300 18.0341   2
   4 -13  -2 24.4370 12.7292   1
  -4 -13   2 9.86697 4.57297   3
   4 -13  -2 -16.007 9.76903   1
  -4 -13   2 3.81281 9.33379   4
  -4 -13   2 9.36772 7.49808   1
  -4 -13   2 2.30598 6.51291   1
  -4  13   2 -2.4546 9.51115   1
  -4  13   2 13.1017 8.88740   2
  -4  13   2 15.8657 5.45698   3
   4  13  -2 7.62139 8.72926   2
  -4  13   2 12.0597 10.6458   1
  -3 -13   2 14.4751 9.44474   4
   3 -13  -2 15.3926 11.3476   1
  -3 -13   2 26.3843 7.47580   1
  -3 -13   2 23.4693 4.37539   3
   3 -13  -2 14.6912 9.75431   1
  -3 -13   2 32.0511 8.60741   1
  -3 -13   2 21.1917 10.6742   2
  -3  13   2 26.4562 10.6474   1
  -3  13   2 33.0999 10.2003   2
  -3  13   2 24.5313 9.15574   1
   3  13  -2 31.0790 10.1542   2
  -3  13   2 25.7285 4.64289   3
  -2 -13   2 13.4118 7.47057   1
  -2 -13   2 34.1342 9.92316   4
  -2 -13   2 -3.2940 8.80545   2
  -2 -13   2 16.0850 3.65143   3
   2 -13  -2 25.4619 10.7508   1
   2 -13  -2 19.5289 9.22407   1
  -2 -13   2 35.7325 8.90781   1
  -2  13   2 8.53419 7.75195   1
   2  13  -2 14.6898 5.42688   1
  -2  13   2 12.1625 9.27082   1
   2  13  -2 17.4057 5.20712   1
   2  13  -2 11.4639 9.08957   2
  -2  13   2 14.6932 9.43585   2
   1 -13  -2 149.792 18.3627   1
  -1 -13   2 138.024 15.5923   1
  -1 -13   2 159.925 16.8766   1
  -1 -13   2 144.473 9.98529   3
  -1 -13   2 156.560 16.4906   2
   1 -13  -2 135.985 16.8862   1
   1  13  -2 116.849 15.4902   2
   1  13  -2 120.432 12.2547   1
  -1  13   2 139.287 15.0130   1
  -1  13   2 132.945 13.3778   1
  -1  13   2 135.422 16.2362   2
   1  13  -2 102.696 13.7268   1
   0 -13  -2 85.7219 14.1845   1
   0 -13   2 97.2624 9.12574   3
   0 -13  -2 101.498 13.3646   1
   0 -13   2 96.5414 14.4623   1
   0 -13   2 92.3410 13.5434   1
   0  13   2 91.7459 11.1837   1
   0  13  -2 109.992 14.6719   2
   0  13  -2 95.8033 12.3275   1
   0  13   2 93.0533 10.3685   1
   0  13  -2 101.128 14.4825   1
   0  13   2 89.9956 14.6471   2
   1 -13   2 96.0291 16.4061   1
  -1 -13  -2 116.005 15.8563   1
   1 -13   2 111.797 15.6028   1
   1 -13   2 118.047 10.6385   3
  -1 -13  -2 106.325 13.2092   1
   1  13   2 96.7150 8.01075   1
   1  13   2 110.778 15.1015   2
  -1  13  -2 122.284 10.8946   3
  -1  13  -2 113.202 16.4895   1
  -1  13  -2 88.3215 14.2864   2
  -1  13  -2 95.6681 13.3326   1
   1  13   2 99.3904 7.89656   1
  -2 -13  -2 50.0460 8.95277   1
  -2 -13  -2 39.1005 10.1914   1
   2 -13   2 41.2457 8.07876   3
   2 -13   2 59.4362 12.3003   1
   2 -13   2 43.9076 12.1047   1
  -2  13  -2 54.9164 9.57392   3
   2  13   2 46.6788 11.1819   2
  -2  13  -2 59.6298 11.0305   2
  -2  13  -2 49.8150 10.9473   1
  -2  13  -2 56.9723 12.9693   1
  -3 -13  -2 396.571 25.7128   1
  -3 -13  -2 349.591 23.3382   1
   3 -13   2 339.776 28.2813   1
   3 -13   2 381.172 29.7424   1
  -3  13  -2 372.674 23.9161   3
  -3  13  -2 296.009 28.8725   1
   3  13   2 366.157 27.3819   2
  -3  13  -2 338.350 26.1340   1
  -3  13  -2 364.706 27.0506   2
  -4 -13  -2 18.0563 10.6407   2
  -4 -13  -2 12.3215 3.54271   3
   4 -13   2 25.8948 11.4521   1
  -4 -13  -2 22.4249 7.81636   1
  -4  13  -2 7.50700 9.12383   2
  -4  13  -2 3.91281 13.9238   1
  -4  13  -2 22.6866 9.94987   1
   4  13   2 2.25731 9.85855   2
  -4  13  -2 20.2570 8.33420   3
  -5 -13  -2 161.614 14.8875   1
   5 -13   2 206.196 23.4972   1
  -5 -13  -2 183.186 16.8543   1
  -5 -13  -2 184.405 14.5376   3
  -5 -13  -2 193.551 21.4694   2
  -5  13  -2 226.734 20.1771   2
   5  13   2 254.558 21.6758   2
  -5  13  -2 222.500 21.6580   1
  -5  13  -2 225.056 20.0188   3
  -6 -13  -2 141.992 12.8178   1
  -6 -13  -2 152.425 14.7479   3
  -6 -13  -2 165.408 15.0013   1
  -6  13  -2 137.058 19.0945   3
  -6  13  -2 160.371 19.3652   2
   6  13   2 172.188 21.3793   2
  -7 -13  -2 62.4361 10.7691   3
   7 -13   2 103.057 18.1793   1
  -7 -13  -2 50.4744 14.5091   4
  -7 -13  -2 49.1508 7.12182   1
  -7 -13  -2 67.6602 8.92999   1
   7 -13   2 37.7215 11.4927   4
  -7  13  -2 36.1194 12.5712   3
  -7  13  -2 47.9271 15.2529   1
  -7  13  -2 51.0315 12.5410   2
   8 -13   2 36.3740 11.9587   4
  -8 -13  -2 33.5511 7.36040   1
  -8 -13  -2 54.7851 12.2028   3
   8 -13   2 35.5166 16.7070   1
  -8 -13  -2 31.1534 14.0678   4
  -8  13  -2 75.6427 16.6871   1
  -8  13  -2 44.9715 13.2679   2
  -9 -13  -2 36.2587 13.6940   4
   9 -13   2 21.9413 11.8885   4
   9 -13   2 4.25639 16.3052   1
  -9 -13  -2 25.5796 13.2061   3
  -9  13  -2 5.59906 16.1537   1
  -9  13  -2 17.9639 13.9011   3
  -9  13  -2 -2.3899 14.7797   2
  10 -13   2 2.68761 17.3687   1
 -10 -13  -2 3.80407 13.7154   4
 -10 -13  -2 1.53836 16.0070   3
 -10  13  -2 -12.014 17.7429   1
 -10  13  -2 8.63817 14.8615   2
 -10  13  -2 36.0577 17.9732   3
  11 -13   2 86.1616 23.9247   1
 -11 -13  -2 48.2186 21.0931   3
 -11  13  -2 66.6123 23.6285   1
 -11  13  -2 91.2339 19.8920   2
 -11  13  -2 107.727 23.4416   3
 -12 -14   2 50.2078 18.4232   4
  12 -14  -2 88.8529 26.9675   1
 -12 -14   2 16.9658 22.5634   3
 -12  14   2 52.2047 26.4895   1
 -12  14   2 83.7504 24.2664   3
 -11 -14   2 53.0230 24.2120   3
 -11 -14   2 31.5841 16.4290   4
  11 -14  -2 21.7010 21.8550   1
 -11  14   2 40.5877 18.8604   3
 -11  14   2 61.9281 21.5613   1
 -10 -14   2 12.0789 14.7246   3
 -10 -14   2 -18.755 12.6544   4
  10 -14  -2 29.3305 20.8419   1
 -10  14   2 -0.2529 16.7967   1
 -10  14   2 20.5833 15.8010   3
  -9 -14   2 126.837 12.8255   1
   9 -14  -2 117.628 23.9400   1
  -9 -14   2 137.399 22.5778   3
  -9  14   2 186.811 23.4884   3
  -9  14   2 181.349 26.5919   1
  -8 -14   2 189.269 16.4043   1
  -8 -14   2 209.729 16.2353   1
  -8 -14   2 184.313 22.2561   4
  -8 -14   2 190.226 21.8876   3
   8 -14  -2 208.153 27.1896   1
  -8  14   2 224.803 26.4604   1
  -8  14   2 240.172 23.5771   3
  -7 -14   2 -7.1524 8.86627   3
  -7 -14   2 12.5078 10.9187   4
   7 -14  -2 2.11536 14.1363   1
  -7 -14   2 16.0005 7.09019   1
  -7 -14   2 9.38138 11.3531   1
  -7  14   2 -15.741 11.5802   1
  -7  14   2 17.4041 10.1070   3
  -6 -14   2 200.905 20.6226   4
  -6 -14   2 144.170 18.0616   3
  -6 -14   2 137.460 15.2448   1
   6 -14  -2 172.778 30.0451   1
  -6 -14   2 158.745 15.6324   3
  -6 -14   2 140.990 14.9988   1
  -6  14   2 165.938 22.3030   1
   6  14  -2 158.858 19.4041   2
  -6  14   2 177.868 17.5053   3
  -5 -14   2 127.880 17.7773   4
  -5 -14   2 149.104 15.0230   1
  -5 -14   2 126.167 11.8450   3
  -5 -14   2 131.120 14.3550   1
   5 -14  -2 132.449 21.7788   1
  -5  14   2 109.167 17.0693   2
  -5  14   2 118.311 17.3384   1
  -5  14   2 122.158 13.9175   3
   5  14  -2 110.652 17.3752   2
  -5  14   2 100.399 19.0622   1
   4 -14  -2 187.908 32.8640   1
  -4 -14   2 222.599 22.4215   4
  -4 -14   2 247.185 19.2180   1
  -4 -14   2 241.278 15.0660   3
  -4 -14   2 235.171 19.8539   1
   4 -14  -2 284.608 27.5573   1
  -4  14   2 196.705 17.8584   3
  -4  14   2 196.077 24.1727   1
   4  14  -2 246.493 22.3166   2
  -4  14   2 261.043 22.6801   2
  -4  14   2 246.290 22.9170   1
  -3 -14   2 51.0222 10.5338   1
  -3 -14   2 49.8745 12.4189   4
   3 -14  -2 41.2034 12.5365   1
   3 -14  -2 83.0848 16.2526   1
  -3 -14   2 65.9893 6.80652   3
  -3 -14   2 65.0762 11.7647   1
  -3  14   2 89.0871 15.0464   1
  -3  14   2 59.0476 13.2093   1
  -3  14   2 85.8886 14.2930   2
   3  14  -2 65.4929 13.1244   2
  -3  14   2 75.6379 7.01233   3
  -2 -14   2 632.803 41.7463   2
  -2 -14   2 557.710 31.6523   3
  -2 -14   2 639.735 38.2913   1
  -2 -14   2 619.450 39.3493   4
  -2 -14   2 633.676 37.1904   1
   2 -14  -2 609.978 38.1864   1
   2 -14  -2 668.018 41.2788   1
   2  14  -2 533.963 33.0874   1
  -2  14   2 579.000 36.8670   1
   2  14  -2 533.327 38.3708   2
  -2  14   2 554.233 37.7967   1
  -2  14   2 577.563 39.0627   2
   2  14  -2 600.358 35.1263   1
  -1 -14   2 59.4752 7.20562   3
  -1 -14   2 82.4241 13.4485   1
   1 -14  -2 74.9906 14.2072   1
  -1 -14   2 56.3098 11.6066   1
   1 -14  -2 81.4466 13.9211   1
   1  14  -2 66.8542 11.1268   1
  -1  14   2 88.9814 13.7269   1
  -1  14   2 89.7018 12.5193   1
   1  14  -2 65.3192 11.4894   1
   1  14  -2 87.4380 14.7903   2
  -1  14   2 99.9742 15.0198   2
   0 -14   2 354.853 25.4288   3
   0 -14  -2 432.298 29.6263   1
   0 -14   2 400.234 29.0302   1
   0 -14  -2 399.186 26.7339   1
   0 -14   2 369.003 28.1035   1
   0  14  -2 364.184 24.9736   1
   0  14   2 395.353 28.2929   2
   0  14  -2 322.382 26.5519   1
   0  14  -2 329.463 27.2120   2
   0  14   2 355.854 23.1714   1
   0  14   2 341.975 23.5232   1
  -1 -14  -2 73.2149 11.0157   1
  -1 -14  -2 77.5688 13.5541   1
   1 -14   2 104.997 17.3600   1
   1 -14   2 67.8148 13.1728   1
  -1  14  -2 80.3144 12.1149   1
  -1  14  -2 59.1241 12.7385   1
   1  14   2 68.9928 6.47705   1
   1  14   2 64.9429 12.6678   2
  -1  14  -2 82.4943 13.5546   2
  -1  14  -2 68.3475 9.75169   3
   1  14   2 62.3520 6.58163   1
  -2 -14  -2 133.265 16.7165   1
  -2 -14  -2 113.472 14.4654   1
   2 -14   2 127.863 19.5753   1
   2 -14   2 106.352 16.7612   1
   2  14   2 111.166 16.8949   2
  -2  14  -2 117.539 16.4595   1
  -2  14  -2 146.487 20.8874   1
  -2  14  -2 103.220 15.8609   2
  -2  14  -2 125.050 12.4617   3
  -3 -14  -2 21.8382 8.03517   1
  -3 -14  -2 25.9243 10.3316   1
   3 -14   2 3.63974 12.3041   1
  -3  14  -2 49.0230 14.4655   1
  -3  14  -2 28.0035 7.88339   3
   3  14   2 25.7508 11.1844   2
  -3  14  -2 12.6222 10.2447   1
  -3  14  -2 16.0619 9.94217   2
  -4 -14  -2 226.074 20.3643   1
  -4 -14  -2 234.918 18.6837   1
   4 -14   2 213.472 24.2274   1
  -4  14  -2 271.680 23.8515   1
   4  14   2 272.583 23.9214   2
  -4  14  -2 239.664 23.1470   2
  -4  14  -2 243.887 20.3272   3
  -4  14  -2 194.623 35.0670   1
  -5 -14  -2 265.371 21.1029   1
  -5 -14  -2 322.346 22.8103   1
  -5  14  -2 306.295 26.8998   1
  -5  14  -2 314.673 24.7992   3
   5  14   2 338.318 27.0113   2
  -5  14  -2 322.241 25.7364   2
  -6 -14  -2 65.4471 10.9601   1
  -6 -14  -2 92.9597 11.6217   3
  -6 -14  -2 90.0877 13.0482   1
   6 -14   2 87.4272 18.2735   1
  -6  14  -2 83.9295 14.5205   2
  -6  14  -2 76.8769 14.3882   3
   6  14   2 69.8411 15.0981   2
  -6  14  -2 58.4190 15.0879   1
  -7 -14  -2 119.093 12.8079   1
  -7 -14  -2 131.038 14.9885   1
   7 -14   2 126.419 19.7673   4
  -7 -14  -2 139.425 21.6227   4
  -7 -14  -2 125.431 16.2864   3
   7 -14   2 197.384 25.3696   1
  -7  14  -2 120.661 17.8089   3
  -7  14  -2 131.471 20.4257   1
  -7  14  -2 133.147 18.7657   2
   8 -14   2 65.8230 19.1050   1
  -8 -14  -2 88.3509 16.5287   4
   8 -14   2 84.3401 15.7484   4
  -8 -14  -2 88.2889 13.9986   3
  -8  14  -2 98.5610 19.2385   1
   9 -14   2 -10.340 13.2176   4
  -9 -14  -2 -5.3553 12.9308   3
  -9 -14  -2 -0.2475 13.9456   4
   9 -14   2 -10.255 18.2720   1
  -9  14  -2 24.2468 19.4791   3
  -9  14  -2 23.4629 17.2827   1
  -9  14  -2 -2.5538 14.6747   2
  10 -14   2 30.0303 20.7196   1
 -10 -14  -2 44.5037 17.0454   4
 -10 -14  -2 17.8927 17.2640   3
 -10  14  -2 21.6593 17.5883   3
 -10  14  -2 20.1084 17.0789   2
 -10  14  -2 15.4822 20.8248   1
  11 -15  -2 26.3105 24.7828   1
 -11 -15   2 25.5203 18.4374   4
 -11 -15   2 53.1478 26.2360   3
 -11  15   2 44.9688 23.1543   1
 -11  15   2 54.1676 20.8057   3
  10 -15  -2 36.9405 23.1476   1
 -10 -15   2 25.7707 16.0289   3
 -10 -15   2 3.35377 15.9072   4
 -10  15   2 75.5947 18.0480   3
 -10  15   2 32.2767 19.3336   1
   9 -15  -2 28.6076 19.8702   1
  -9 -15   2 60.2037 14.4036   3
  -9 -15   2 27.9565 14.9601   4
  -9  15   2 38.2859 14.8121   3
  -9  15   2 51.2332 16.6662   1
  -8 -15   2 131.097 20.3856   4
  -8 -15   2 157.943 15.1205   1
   8 -15  -2 175.731 29.4403   1
  -8 -15   2 120.789 20.6318   3
  -8  15   2 138.446 23.3883   1
  -8  15   2 203.581 23.0014   3
   7 -15  -2 446.772 37.3642   1
  -7 -15   2 367.733 25.0903   1
  -7 -15   2 334.278 25.0361   1
  -7 -15   2 324.103 26.1155   3
  -7 -15   2 362.933 25.7923   3
  -7  15   2 414.028 29.3216   3
  -7  15   2 352.342 31.1556   1
  -6 -15   2 181.934 17.5400   1
  -6 -15   2 184.337 23.9356   3
  -6 -15   2 162.625 15.4630   3
  -6 -15   2 199.283 25.6841   4
   6 -15  -2 223.673 27.0658   1
  -6 -15   2 157.437 17.4181   1
   6  15  -2 181.762 22.5869   2
  -6  15   2 182.518 18.7498   3
  -5 -15   2 220.919 22.8779   4
   5 -15  -2 173.043 28.7864   1
  -5 -15   2 208.816 19.3541   1
  -5 -15   2 214.208 15.0647   3
  -5 -15   2 220.776 18.3126   3
  -5 -15   2 214.212 19.7237   1
  -5  15   2 262.151 24.2164   1
   5  15  -2 196.603 25.7036   2
  -5  15   2 218.234 17.7427   3
  -5  15   2 195.326 22.7088   2
  -4 -15   2 45.0661 10.8760   1
   4 -15  -2 26.0366 15.6189   1
  -4 -15   2 33.8473 12.8943   4
  -4 -15   2 48.2390 6.44265   3
  -4 -15   2 46.2964 11.1467   1
  -4  15   2 49.8359 13.1538   2
  -4  15   2 49.5173 13.4082   1
   4  15  -2 49.8621 12.5946   2
  -4  15   2 38.9994 7.17571   3
  -4  15   2 21.0903 15.4902   1
  -3 -15   2 138.787 19.1450   4
  -3 -15   2 130.393 9.10946   3
   3 -15  -2 197.533 24.5213   1
  -3 -15   2 170.676 18.2665   1
  -3 -15   2 149.300 17.9394   1
  -3  15   2 174.352 19.2840   1
   3  15  -2 139.220 18.7328   2
  -3  15   2 166.757 21.0325   1
  -3  15   2 186.684 20.0298   2
  -3  15   2 137.108 9.33353   3
  -2 -15   2 151.917 18.0993   1
   2 -15  -2 117.455 20.3870   1
  -2 -15   2 164.167 18.4035   1
  -2 -15   2 129.226 8.80680   3
  -2 -15   2 141.757 18.7715   4
   2 -15  -2 148.109 22.4370   1
  -2  15   2 142.247 19.3294   1
   2  15  -2 123.205 17.9622   2
   2  15  -2 150.641 11.8551   1
  -2  15   2 131.182 16.7793   1
  -2  15   2 151.991 19.1571   2
  -1 -15   2 410.389 32.4635   4
   1 -15  -2 491.494 33.2684   1
   1 -15  -2 534.774 36.4884   1
  -1 -15   2 477.868 33.3763   1
  -1 -15   2 441.118 31.4474   1
   1  15  -2 458.923 33.0454   2
   1  15  -2 442.956 28.2625   1
  -1  15   2 434.203 30.6686   1
  -1  15   2 424.919 29.3319   1
  -1  15   2 485.160 33.5197   2
   0 -15  -2 153.060 19.1192   1
   0 -15   2 155.156 19.8073   1
   0 -15  -2 218.638 22.7394   1
   0 -15   2 167.200 20.4867   1
   0  15   2 169.535 14.7432   1
   0  15  -2 162.591 18.9077   1
   0  15  -2 159.472 19.5024   2
   0  15   2 206.047 20.7087   2
   0  15  -2 186.695 17.6771   1
   0  15   2 181.193 15.7443   1
   1 -15   2 257.969 26.2088   1
  -1 -15  -2 262.474 23.2608   1
   1 -15   2 226.527 24.8710   1
  -1 -15  -2 266.474 24.9700   1
  -1  15  -2 288.063 24.7239   2
  -1  15  -2 294.767 26.1165   1
  -1  15  -2 301.153 19.1509   3
   1  15   2 356.752 26.7392   2
  -1  15  -2 319.314 23.6105   1
  -2 -15  -2 134.175 19.2018   1
  -2 -15  -2 151.858 17.1398   1
   2 -15   2 144.540 21.3121   1
  -2  15  -2 149.779 13.6580   3
  -2  15  -2 158.624 22.5235   1
  -2  15  -2 114.993 17.8239   2
  -2  15  -2 113.267 17.4416   1
   2  15   2 133.884 19.2335   2
  -3 -15  -2 162.581 20.0406   1
  -3 -15  -2 162.357 17.7108   1
   3 -15   2 147.186 21.7403   1
  -3  15  -2 173.109 16.1895   3
  -3  15  -2 156.792 20.5811   1
   3  15   2 188.606 21.0968   2
  -3  15  -2 173.969 25.7455   1
  -3  15  -2 161.275 19.2232   2
  -4 -15  -2 30.8314 10.8134   1
  -4 -15  -2 32.3209 9.42274   1
  -4  15  -2 26.8132 9.42139   3
   4  15   2 36.9096 13.3035   2
  -4  15  -2 28.9084 11.4687   2
  -4  15  -2 32.8363 13.1348   1
  -5 -15  -2 90.0430 6.41673   3
   5 -15   2 85.8140 18.3737   1
  -5 -15  -2 108.133 14.8566   1
  -5  15  -2 112.162 18.2047   1
  -5  15  -2 131.595 17.7411   3
   5  15   2 116.661 20.8134   2
  -5  15  -2 145.115 18.3797   2
  -6 -15  -2 215.360 20.6642   1
  -6 -15  -2 238.130 16.9737   3
  -6 -15  -2 235.878 19.0034   1
   6 -15   2 239.487 29.2570   1
   6 -15   2 202.564 23.9891   4
   6  15   2 236.213 26.7662   2
  -6  15  -2 235.755 26.2266   1
  -6  15  -2 256.566 24.4200   3
  -6  15  -2 249.343 23.9415   2
  -7 -15  -2 62.9246 10.3115   3
  -7 -15  -2 74.3026 12.2832   1
   7 -15   2 52.0580 15.3016   4
   7 -15   2 102.749 19.2745   1
  -7  15  -2 65.2264 15.0444   3
   7  15   2 58.4203 16.3975   2
  -7  15  -2 52.1606 16.7028   1
   8 -15   2 28.6074 15.0479   4
   8 -15   2 21.3211 18.8182   1
  -8 -15  -2 33.0578 12.0968   3
  -8 -15  -2 8.85958 18.9210   4
  -8  15  -2 63.4302 18.1558   1
  -8  15  -2 33.2356 14.6611   2
  -8  15  -2 27.6264 15.8796   3
   9 -15   2 4.85511 20.8487   1
  -9 -15  -2 22.0373 16.6863   4
   9 -15   2 27.4474 16.2149   4
  -9  15  -2 -3.1203 16.1681   2
  -9  15  -2 -7.3383 15.4370   3
  -9  15  -2 52.4503 19.9866   1
  10 -15   2 55.4694 24.8045   1
 -10 -15  -2 45.4282 18.4335   4
 -10  15  -2 10.2811 20.6950   3
 -10  15  -2 58.4932 24.8032   1
 -10  15  -2 43.1583 18.2425   2
 -11 -16   2 2.67503 19.0371   4
  11 -16  -2 0.64267 29.0782   1
 -11  16   2 -14.036 25.4539   1
 -10 -16   2 0.72175 16.8657   4
 -10  16   2 50.7700 18.7924   3
 -10  16   2 -3.5006 19.2796   1
  -9 -16   2 131.257 22.7799   3
   9 -16  -2 92.3963 25.8947   1
  -9 -16   2 112.560 19.4333   4
  -9  16   2 154.410 25.6180   3
  -9  16   2 97.6469 22.6521   1
  -8 -16   2 12.1314 11.4485   3
  -8 -16   2 34.7401 9.83802   1
  -8 -16   2 10.4661 15.1298   4
   8 -16  -2 28.6094 19.5221   1
  -8  16   2 25.1861 13.9624   3
  -8  16   2 23.4895 14.2708   2
  -8  16   2 29.7740 16.9974   1
  -7 -16   2 31.0582 9.48445   3
  -7 -16   2 24.2771 11.9560   1
  -7 -16   2 33.8727 10.4131   1
  -7 -16   2 33.2161 14.5893   4
   7 -16  -2 24.5696 18.5160   1
  -7  16   2 15.1860 13.7264   2
  -7  16   2 20.2305 11.4237   3
  -7  16   2 42.9460 15.3548   1
   7  16  -2 36.8586 14.4570   2
  -6 -16   2 88.8170 13.7763   1
  -6 -16   2 126.778 20.6642   4
  -6 -16   2 116.458 17.4706   1
  -6 -16   2 128.494 13.5883   3
   6 -16  -2 125.728 22.8945   1
  -6 -16   2 93.4056 12.0703   3
   6  16  -2 127.358 20.0144   2
  -6  16   2 132.295 22.3074   1
  -6  16   2 114.180 16.3639   3
  -6  16   2 107.809 18.3119   2
  -5 -16   2 159.471 19.4852   1
  -5 -16   2 149.266 12.1160   3
  -5 -16   2 177.326 12.0262   3
  -5 -16   2 194.523 21.5022   1
   5 -16  -2 148.140 24.5524   1
  -5 -16   2 171.750 22.2922   4
  -5  16   2 153.093 20.9210   1
   5  16  -2 153.864 21.0853   2
  -5  16   2 182.405 15.9869   3
  -5  16   2 162.507 22.3122   2
  -4 -16   2 322.705 26.6157   1
   4 -16  -2 314.195 44.0493   1
  -4 -16   2 411.605 27.7968   1
  -4  16   2 251.835 31.7360   1
  -4  16   2 399.045 29.6698   1
   4  16  -2 268.999 31.2493   2
  -3 -16   2 72.5713 17.0191   4
   3 -16  -2 100.536 19.4075   1
  -3 -16   2 104.438 17.9796   1
  -3 -16   2 82.6962 14.1240   1
  -3  16   2 85.1931 19.3893   2
   3  16  -2 64.7933 17.3742   2
  -3  16   2 84.9080 17.3626   1
  -3  16   2 83.7466 14.9226   1
  -2 -16   2 543.056 36.3941   1
  -2 -16   2 543.545 37.6740   4
  -2 -16   2 546.255 36.6827   1
   2 -16  -2 578.587 39.7305   1
   2  16  -2 476.449 36.5799   2
  -2  16   2 526.351 37.5015   2
   2  16  -2 480.270 29.0847   1
  -2  16   2 513.745 34.5318   1
   1 -16  -2 185.270 21.4753   1
  -1 -16   2 195.775 22.7208   1
   1 -16  -2 205.781 23.2418   1
  -1 -16   2 173.511 21.5530   1
  -1 -16   2 137.168 20.9767   4
   1  16  -2 189.642 21.4990   2
   1  16  -2 191.386 16.4346   1
  -1  16   2 194.876 18.1014   1
  -1  16   2 207.283 20.3505   1
  -1  16   2 206.010 21.9758   2
   0 -16   2 174.983 22.6108   1
   0 -16  -2 182.201 23.2355   1
   0 -16   2 176.436 26.0001   1
   0 -16  -2 143.367 21.0541   1
   0  16  -2 173.946 20.6460   2
   0  16   2 142.210 14.5012   1
   0  16  -2 128.594 19.9583   1
   0  16  -2 170.060 16.9115   1
   0  16   2 162.536 15.2311   1
   0  16   2 136.998 20.2499   2
   1 -16   2 50.8510 14.1024   1
  -1 -16  -2 47.3883 13.1062   1
  -1 -16  -2 72.9247 15.0839   1
   1  16   2 60.3524 14.1483   2
  -1  16  -2 52.3436 11.9174   1
  -1  16  -2 62.9564 13.5716   2
  -1  16  -2 17.9812 13.4365   1
  -2 -16  -2 22.8119 11.6878   1
  -2 -16  -2 22.5440 13.0021   1
  -2  16  -2 26.5825 12.0273   1
  -2  16  -2 45.9423 12.5955   2
   2  16   2 51.2200 13.5395   2
  -2  16  -2 65.9536 16.6384   1
  -2  16  -2 43.8511 7.98691   3
  -3 -16  -2 22.1747 10.5748   1
  -3 -16  -2 -11.059 11.0957   1
  -3  16  -2 -6.5470 7.64153   3
  -3  16  -2 -2.9027 9.91156   2
  -4 -16  -2 94.3626 15.6992   1
   4 -16   2 111.880 20.4772   1
  -4 -16  -2 114.083 17.4354   1
  -4  16  -2 89.6763 13.2820   3
  -4  16  -2 103.139 16.3483   2
   4  16   2 92.8004 21.1262   2
   5 -16   2 140.474 23.9382   1
  -5 -16  -2 171.910 20.9218   1
  -5 -16  -2 146.057 18.7793   1
  -5  16  -2 178.097 24.0684   1
  -5  16  -2 171.903 20.1109   3
   5  16   2 175.501 22.8458   2
  -6 -16  -2 89.1119 10.7087   3
   6 -16   2 118.314 21.7201   1
  -6 -16  -2 77.1396 16.8666   4
  -6 -16  -2 124.282 18.9699   1
   6 -16   2 102.527 17.7923   4
  -6  16  -2 108.403 17.9262   2
  -6  16  -2 105.324 19.9410   1
   6  16   2 87.6141 18.4869   2
  -6  16  -2 92.8504 15.8772   3
  -7 -16  -2 70.0522 17.0166   4
   7 -16   2 85.7286 20.7714   1
   7 -16   2 72.1699 16.5551   4
  -7  16  -2 93.9944 18.2826   2
   7  16   2 74.5856 17.2460   2
  -7  16  -2 78.8783 18.1718   1
  -7  16  -2 92.3612 17.2914   3
   8 -16   2 39.4563 16.5797   4
   8 -16   2 45.9901 20.2467   1
  -8 -16  -2 13.1157 16.6158   4
  -8  16  -2 2.60694 16.3222   2
  -8  16  -2 25.8483 16.2833   3
  -8  16  -2 11.4519 17.9645   1
  -9 -16  -2 15.6804 18.0694   4
   9 -16   2 -13.089 22.2862   1
  -9  16  -2 -0.9877 17.6356   3
  -9  16  -2 16.7328 21.0307   1
  -9  16  -2 0.07143 16.6543   2
  10 -17  -2 -19.306 26.5959   1
 -10 -17   2 -6.2418 19.4503   4
 -10  17   2 3.07247 19.1942   3
 -10  17   2 13.8969 23.7966   1
 -10  17   2 2.58735 20.6509   2
  -9 -17   2 38.5792 16.8263   4
   9 -17  -2 10.3462 23.2520   1
  -9  17   2 11.1189 16.8437   3
  -9  17   2 16.9203 18.8270   1
  -9  17   2 20.4456 17.4588   2
  -8 -17   2 36.2504 17.1574   4
   8 -17  -2 60.3882 23.4492   1
  -8  17   2 72.2229 18.6318   2
  -8  17   2 73.1137 18.4747   1
  -8  17   2 49.5663 15.5669   3
  -7 -17   2 4.80493 10.0173   3
   7 -17  -2 17.1521 20.7502   1
  -7 -17   2 2.13652 10.9920   1
  -7 -17   2 -13.177 14.1627   4
  -7  17   2 19.1840 14.0610   2
  -7  17   2 8.66209 11.7724   3
   7  17  -2 2.31825 14.3297   2
  -7  17   2 18.6455 15.9576   1
  -6 -17   2 139.057 20.5304   1
   6 -17  -2 153.599 25.4355   1
  -6 -17   2 150.860 21.0136   1
  -6 -17   2 146.879 23.1999   4
  -6  17   2 118.815 17.9199   3
  -6  17   2 156.594 23.4231   2
   6  17  -2 148.331 22.4886   2
  -6  17   2 126.912 20.5386   1
  -5 -17   2 74.3280 14.4930   1
  -5 -17   2 47.6500 12.7753   1
   5 -17  -2 24.5273 19.2526   1
  -5 -17   2 42.3495 15.0542   4
  -5  17   2 40.6618 15.0712   1
  -5  17   2 43.7722 14.9935   2
  -5  17   2 71.1297 11.7759   3
   5  17  -2 31.7155 13.3107   2
  -4 -17   2 248.003 25.7100   1
  -4 -17   2 309.135 25.6395   1
  -4 -17   2 234.639 26.8051   4
   4 -17  -2 261.031 31.3492   1
  -4  17   2 256.606 27.0323   2
   4  17  -2 281.268 26.6806   2
  -4  17   2 295.918 27.2057   1
  -4  17   2 226.457 15.8016   3
  -3 -17   2 439.440 35.2181   1
  -3 -17   2 481.116 37.1668   4
  -3 -17   2 555.431 36.7216   1
   3  17  -2 460.768 36.3277   2
  -3  17   2 441.357 36.8871   2
  -3  17   2 553.892 35.6013   1
  -3  17   2 453.575 38.1916   1
  -2 -17   2 61.5871 15.9901   1
   2 -17  -2 62.3660 17.1201   1
  -2 -17   2 86.0466 16.3851   1
  -2 -17   2 77.4428 15.6919   4
   2  17  -2 59.5926 8.64996   1
  -2  17   2 70.9128 15.7443   2
  -2  17   2 63.5571 15.0435   1
   2  17  -2 43.4154 14.3060   2
  -2  17   2 75.6846 13.6787   1
  -1 -17   2 600.982 46.0264   4
   1 -17  -2 728.535 48.7270   1
  -1 -17   2 742.820 46.6624   1
  -1  17   2 692.006 41.1424   1
   1  17  -2 675.465 39.7982   1
  -1  17   2 633.514 46.2606   2
   0 -17  -2 61.2750 16.5256   1
   0 -17   2 76.0189 15.8954   1
   0 -17   2 38.6128 16.8000   4
   0  17   2 44.2168 15.2234   2
   0  17   2 87.7005 11.8475   1
   0  17  -2 53.7972 11.3476   1
   0  17   2 57.2101 9.82062   1
   0  17  -2 58.0815 13.9012   1
  -1 -17  -2 119.800 17.6445   1
  -1 -17  -2 115.402 19.7423   1
   1 -17   2 134.440 20.9323   1
  -1  17  -2 118.562 18.7920   1
   1  17   2 124.698 20.6023   2
  -2 -17  -2 111.311 18.4285   1
   2 -17   2 143.794 31.8998   1
  -2 -17  -2 135.106 21.1050   1
  -2  17  -2 57.2291 19.4055   1
   2  17   2 93.2905 17.4490   2
  -2  17  -2 107.860 12.6134   3
  -2  17  -2 92.8501 15.7244   1
  -3 -17  -2 9.67178 12.2899   1
  -3 -17  -2 -5.2326 12.7727   1
   3 -17   2 -5.9122 14.2515   1
   3  17   2 12.7499 12.7723   2
  -3  17  -2 11.0057 13.6604   2
  -3  17  -2 -3.4361 8.09206   3
  -3  17  -2 4.59527 11.8869   1
  -4 -17  -2 -1.5850 13.2430   1
  -4 -17  -2 -10.730 11.9053   1
   4 -17   2 -9.5991 15.0707   1
  -4  17  -2 -12.732 12.7537   1
   4  17   2 11.1709 14.1812   2
  -4  17  -2 8.60897 9.84023   3
  -4  17  -2 -0.2471 13.1493   2
  -5 -17  -2 127.788 21.8979   1
   5 -17   2 56.5955 19.2903   1
  -5  17  -2 92.5674 17.1087   2
   5  17   2 97.2433 25.8497   2
  -5  17  -2 93.4309 29.6421   1
  -5  17  -2 90.3265 14.3968   3
  -6 -17  -2 31.1284 14.3023   1
   6 -17   2 15.8021 17.4916   4
   6 -17   2 16.8402 17.8151   1
  -6 -17  -2 10.8965 15.3364   4
  -6  17  -2 5.44096 13.5600   3
   6  17   2 17.7897 16.5868   2
  -6  17  -2 16.9081 16.3695   1
  -6  17  -2 15.4491 14.2019   2
  -7 -17  -2 41.5729 17.9893   4
   7 -17   2 19.4408 19.6216   4
   7 -17   2 8.62288 19.7353   1
  -7  17  -2 10.7350 15.5527   2
   7  17   2 -0.4607 15.9685   2
  -7  17  -2 19.2674 15.1604   3
  -7  17  -2 5.37710 16.6658   1
  -8 -17  -2 19.6354 18.8659   4
   8 -17   2 0.51117 22.4222   1
   8 -17   2 15.7932 20.7223   4
  -8  17  -2 26.6958 17.4185   2
  -8  17  -2 29.4847 18.1367   3
  -8  17  -2 14.5759 20.4023   1
  -9 -17  -2 48.7955 21.7817   4
   9 -17   2 27.7386 26.5477   1
  -9  17  -2 65.4775 22.1000   2
  -9  17  -2 63.6742 25.9277   1
  -9  17  -2 67.2374 22.1119   3
   9 -18  -2 29.0392 28.4806   1
  -9 -18   2 38.1223 19.7160   4
  -9  18   2 32.8489 22.6417   1
  -8 -18   2 -35.837 16.6808   4
   8 -18  -2 41.6594 25.0730   1
  -8  18   2 5.36759 17.2826   2
  -8  18   2 62.9821 20.2115   1
  -8  18   2 2.97460 15.4550   3
   7 -18  -2 56.8992 23.6737   1
  -7 -18   2 58.3546 14.4137   1
  -7 -18   2 37.5491 17.8704   4
   7  18  -2 60.7898 17.6011   2
  -7  18   2 56.9537 19.0890   1
  -7  18   2 53.3528 14.1735   3
  -7  18   2 49.5590 18.0441   2
  -6 -18   2 21.1922 13.6166   1
  -6 -18   2 47.0398 16.9426   4
   6 -18  -2 47.3659 21.7667   1
  -6  18   2 26.8287 15.8554   2
   6  18  -2 50.0421 16.3330   2
  -6  18   2 26.1051 16.6642   1
  -6  18   2 14.7581 10.5532   3
  -5 -18   2 134.751 19.6722   1
   5 -18  -2 192.243 32.9621   1
  -5 -18   2 152.035 22.8621   1
  -5 -18   2 159.381 24.6091   4
   5  18  -2 140.179 23.3928   2
  -5  18   2 183.989 24.7139   1
  -5  18   2 123.863 21.6656   2
  -5  18   2 155.013 14.6304   3
  -4 -18   2 181.200 27.4338   1
  -4 -18   2 215.976 25.1758   1
  -4 -18   2 197.715 25.5572   4
   4 -18  -2 228.234 31.1083   1
  -4  18   2 216.702 25.8996   1
   4  18  -2 191.351 24.8973   2
  -4  18   2 195.144 25.8894   2
  -3 -18   2 214.889 23.5347   1
   3 -18  -2 185.395 26.7640   1
  -3 -18   2 149.026 23.9056   4
   3  18  -2 128.586 22.4588   2
  -3  18   2 149.654 21.9883   1
  -3  18   2 149.820 23.4453   2
  -3  18   2 144.082 23.0292   1
   2 -18  -2 379.309 55.8435   1
  -2 -18   2 513.516 38.3744   4
  -2 -18   2 553.812 38.0421   1
   2  18  -2 435.048 36.8060   2
  -2  18   2 477.377 38.1981   2
  -1 -18   2 4.06634 13.7222   4
  -1 -18   2 10.7712 13.7454   1
   1 -18  -2 2.89287 15.1116   1
   1  18  -2 18.9088 13.3259   2
  -1  18   2 36.4786 13.1109   1
  -1  18   2 6.63415 13.1334   2
  -1  18   2 19.8285 10.0670   1
   1  18  -2 14.9713 8.68112   1
   0 -18   2 229.869 27.3739   4
   0 -18   2 210.218 31.4776   1
   0 -18  -2 265.466 28.2378   1
   0  18  -2 214.290 25.2766   1
   0  18   2 197.602 17.8487   1
   0  18  -2 226.111 25.1204   2
   0  18   2 235.949 26.1566   2
   0  18  -2 183.256 21.1665   1
   0  18   2 206.577 17.0070   1
  -1 -18  -2 20.9667 15.7149   1
   1 -18   2 19.6317 16.0813   1
   1 -18   2 4.13481 13.5692   4
  -1  18  -2 8.10638 12.5274   2
  -1  18  -2 -12.729 16.2076   1
   1  18   2 5.25470 13.3447   2
  -1  18  -2 20.7133 11.7078   1
   2 -18   2 34.3326 16.1553   1
   2 -18   2 24.8611 14.1932   4
  -2 -18  -2 35.7370 15.6459   1
  -2 -18  -2 17.7331 16.8474   1
  -2  18  -2 31.0281 13.3298   1
  -2  18  -2 15.6772 19.4780   1
   2  18   2 20.1902 13.9808   2
  -2  18  -2 27.1468 13.5443   2
  -3 -18  -2 -8.8170 15.0572   1
  -3 -18  -2 29.7593 15.3010   1
   3 -18   2 31.1895 16.3991   1
   3 -18   2 30.1018 14.6497   4
  -3  18  -2 20.0811 9.60513   3
  -3  18  -2 16.9299 14.6051   2
   3  18   2 42.9759 15.0922   2
   4 -18   2 29.2684 15.2720   4
  -4 -18  -2 40.9787 16.0028   1
   4 -18   2 54.1828 18.7007   1
  -4 -18  -2 51.2784 16.2928   1
  -4  18  -2 20.1976 14.2576   2
   4  18   2 5.04173 15.0835   2
  -4  18  -2 51.7393 16.3694   1
  -4  18  -2 23.7311 11.4073   3
   5 -18   2 -18.180 14.8305   4
  -5 -18  -2 42.2378 15.4305   1
   5 -18   2 30.6358 20.2383   1
  -5  18  -2 46.1640 17.0497   2
   5  18   2 11.2042 15.4828   2
  -5  18  -2 15.2064 15.4052   1
  -5  18  -2 7.95872 12.5123   3
   6 -18   2 34.7661 20.5741   1
  -6 -18  -2 57.4239 17.6336   4
   6 -18   2 25.0893 16.9400   4
  -6  18  -2 24.6233 17.1977   1
  -6  18  -2 30.8734 16.8678   2
   6  18   2 35.0673 18.0749   2
  -6  18  -2 45.7282 15.6378   3
   7 -18   2 17.7860 18.0967   4
  -7 -18  -2 -12.797 17.9770   4
   7 -18   2 16.9323 22.3618   1
  -7  18  -2 18.8156 17.1435   3
   7  18   2 -16.255 17.3283   2
  -7  18  -2 44.8575 18.6280   2
  -7  18  -2 -14.346 17.9423   1
   8 -18   2 43.3046 20.3644   4
  -8 -18  -2 -6.9446 20.4948   4
   8 -18   2 4.59393 25.7882   1
  -8  18  -2 64.1675 21.1148   2
  -8  18  -2 31.0572 19.3301   3
  -8  18  -2 -9.6365 20.9849   1
  -9 -19   2 8.27196 22.3454   4
  -9  19   2 20.0114 25.5358   2
   8 -19  -2 87.0499 28.7440   1
  -8  19   2 70.8287 24.8975   1
   7 -19  -2 67.3010 26.7201   1
  -7 -19   2 27.5645 19.7055   4
   7  19  -2 41.6485 18.6522   2
  -7  19   2 22.7848 19.0019   1
  -7  19   2 21.8629 19.4075   2
   6 -19  -2 -0.1224 21.2380   1
  -6 -19   2 15.0549 17.7666   4
  -6 -19   2 4.78574 15.2328   1
  -6  19   2 19.1185 18.2660   2
  -6  19   2 27.3947 18.4023   1
   6  19  -2 42.0337 16.8610   2
  -5 -19   2 69.2536 19.1782   4
   5 -19  -2 76.5296 24.8543   1
  -5 -19   2 90.1333 17.4789   1
  -5  19   2 68.0102 18.6250   2
   5  19  -2 46.6187 17.5032   2
  -5  19   2 72.1177 17.9118   1
   4 -19  -2 186.900 30.2239   1
  -4 -19   2 116.563 21.5738   4
  -4 -19   2 159.113 23.8349   1
  -4  19   2 146.466 22.3710   1
   4  19  -2 97.9502 20.1044   2
  -4  19   2 107.188 21.3589   2
  -3 -19   2 217.196 27.6909   4
   3 -19  -2 209.338 33.0674   1
  -3 -19   2 197.659 26.8831   1
  -3  19   2 247.877 25.8390   1
  -3  19   2 280.092 34.1001   1
   3  19  -2 204.063 26.2680   2
  -3  19   2 184.212 27.0234   2
   2 -19  -2 -3.2202 16.9279   1
  -2 -19   2 16.9916 15.3124   1
  -2 -19   2 3.97394 14.5029   4
  -2  19   2 -5.1108 12.2379   1
   2  19  -2 -4.1835 13.6651   2
  -2  19   2 -0.9875 14.0547   2
  -2  19   2 9.85818 17.0152   1
  -1 -19   2 116.812 20.4313   4
   1 -19  -2 137.875 24.7385   1
  -1  19   2 143.217 23.9200   2
   1  19  -2 134.425 21.6574   2
  -1  19   2 143.155 18.5766   1
   1  19  -2 123.082 16.1122   1
   0 -19  -2 2.81708 26.0936   1
   0 -19   2 6.47730 16.1148   1
   0 -19   2 22.1080 14.6253   4
   0  19   2 27.4911 15.5904   2
   0  19   2 13.3509 8.70431   1
   0  19  -2 11.4555 11.3834   1
   0  19  -2 19.7489 13.7844   2
   0  19  -2 0.24315 18.6506   1
   1 -19   2 56.8444 18.1108   1
   1 -19   2 56.8331 17.4106   4
  -1 -19  -2 57.9701 19.0695   1
  -1  19  -2 29.7539 18.5687   1
   1  19   2 29.2586 15.7345   2
  -1  19  -2 66.7128 14.7016   1
  -1  19  -2 28.3144 15.3897   2
  -2 -19  -2 39.1851 16.7928   1
   2 -19   2 28.3850 17.8041   1
   2 -19   2 33.9314 16.9856   4
  -2  19  -2 16.4140 13.9303   1
  -2  19  -2 44.3151 16.4206   2
   2  19   2 39.4333 16.3480   2
   3 -19   2 45.7973 17.0257   4
  -3 -19  -2 35.9752 17.8945   1
   3 -19   2 40.2878 18.5833   1
  -3  19  -2 10.4694 9.69961   3
  -3  19  -2 14.0622 14.7057   2
   3  19   2 25.3821 16.6276   2
  -3  19  -2 26.0289 15.3605   1
  -4 -19  -2 38.9287 17.8832   1
   4 -19   2 9.45878 19.2748   1
   4 -19   2 9.07237 15.8211   4
  -4  19  -2 12.5604 15.3540   2
   4  19   2 17.8501 16.0469   2
  -4  19  -2 27.9415 12.1420   3
  -4  19  -2 24.7892 16.3931   1
  -5 -19  -2 37.3564 18.0927   1
   5 -19   2 13.2097 19.2910   4
   5 -19   2 -15.310 19.9892   1
  -5  19  -2 26.4266 15.6962   3
  -5  19  -2 5.85109 15.8395   2
   5  19   2 10.3269 18.1872   2
  -5  19  -2 40.1320 19.4471   1
  -6 -19  -2 53.1363 20.4645   4
   6 -19   2 17.0992 23.4192   1
   6 -19   2 61.3336 20.7644   4
  -6  19  -2 50.0796 20.5702   1
  -6  19  -2 54.6402 27.7126   3
   6  19   2 31.3604 19.6844   2
  -7 -19  -2 15.5030 20.7404   4
   7 -19   2 34.3331 25.3623   1
   7 -19   2 66.4934 22.0056   4
  -7  19  -2 26.6870 20.8471   2
   7  19   2 3.47608 20.6583   2
  -7  19  -2 22.7142 23.2526   1
  -8 -20   2 30.1646 24.7112   4
   8 -20  -2 80.8968 48.6637   1
  -8  20   2 40.5658 25.3553   2
  -7 -20   2 69.0679 24.8495   4
   7 -20  -2 39.3427 28.4586   1
   7  20  -2 12.2448 20.8887   2
  -7  20   2 67.6840 23.5833   1
  -7  20   2 26.8271 21.7877   2
  -6 -20   2 -6.0791 19.3343   4
   6 -20  -2 30.7110 24.9820   1
  -6 -20   2 13.7287 18.5777   1
  -6  20   2 23.9134 20.0500   2
   6  20  -2 55.8001 19.1576   2
  -6  20   2 41.5660 21.0758   1
  -5 -20   2 -4.6963 17.8694   4
   5 -20  -2 -18.613 23.7669   1
  -5 -20   2 -11.436 16.2364   1
  -5  20   2 15.6100 17.7189   1
  -5  20   2 23.1100 18.2377   2
   5  20  -2 -6.6651 16.0043   2
   4 -20  -2 86.8400 24.3170   1
  -4 -20   2 72.5827 20.4220   4
  -4 -20   2 70.2613 18.8626   1
  -4  20   2 57.1179 18.1686   1
  -4  20   2 66.7906 20.0050   2
   4  20  -2 61.3732 19.6626   2
  -3 -20   2 22.0917 16.9412   4
   3 -20  -2 43.1543 22.6200   1
  -3  20   2 38.2325 17.0411   2
   3  20  -2 21.9679 16.6370   2
  -3  20   2 17.5199 14.9588   1
   2 -20  -2 194.447 33.0276   1
  -2 -20   2 181.004 28.1787   4
  -2 -20   2 210.243 29.9292   1
  -2  20   2 170.259 27.8124   2
  -2  20   2 169.196 25.0576   1
   2  20  -2 165.644 28.3451   2
   1 -20  -2 5.80911 18.5829   1
  -1 -20   2 0.73880 16.4498   4
  -1 -20   2 37.7963 17.2384   1
  -1  20   2 7.72046 11.5636   1
   1  20  -2 1.76176 14.8257   2
  -1  20   2 7.47472 15.7937   2
   0 -20   2 233.690 30.2239   1
   0 -20   2 195.131 27.3740   4
   0 -20  -2 177.899 26.7728   1
   0  20  -2 157.348 22.0669   1
   0  20   2 147.549 24.4994   2
   0  20  -2 172.279 26.9694   2
   1 -20   2 20.8357 19.6565   4
   1 -20   2 -2.7687 18.4031   1
  -1 -20  -2 -31.753 22.1858   1
   1  20   2 12.9851 15.7785   2
  -1  20  -2 4.19576 15.6730   2
  -1  20  -2 47.1389 15.2145   1
  -2 -20  -2 37.3317 22.5571   1
   2 -20   2 34.3602 20.2226   1
   2 -20   2 26.0357 17.4818   4
   2  20   2 36.9401 18.6012   2
  -2  20  -2 48.2844 18.8076   2
   3 -20   2 53.3183 20.9621   1
  -3 -20  -2 37.7905 19.7134   1
   3 -20   2 20.5370 18.9284   4
  -3  20  -2 15.8727 17.1966   2
  -3  20  -2 14.3156 15.9794   1
   3  20   2 45.0405 19.3998   2
  -4 -20  -2 31.2264 20.2168   1
   4 -20   2 22.7207 22.2084   1
   4 -20   2 44.7559 19.9901   4
  -4  20  -2 48.4771 19.4069   1
   4  20   2 44.2714 18.5954   2
  -4  20  -2 39.8806 18.1474   2
  -5 -20  -2 -38.453 18.4806   4
   5 -20   2 -20.973 24.0581   1
   5 -20   2 29.0536 19.7602   4
  -5  20  -2 32.7946 18.5822   2
  -5  20  -2 35.1320 19.7228   1
   5  20   2 0.07246 18.4138   2
  -6 -20  -2 45.1336 23.8266   4
   6 -20   2 36.3810 27.4713   1
   6 -20   2 79.4365 22.8221   4
  -6  20  -2 75.3718 23.4922   1
  -6  20  -2 45.0841 21.7344   2
   6  20   2 21.7716 20.8071   2
   6 -21  -2 30.2001 29.7162   1
  -6 -21   2 -6.0612 23.1685   4
   6  21  -2 63.1540 24.0162   2
  -6  21   2 49.0943 23.6647   2
  -6  21   2 51.3398 23.5949   1
   5 -21  -2 38.6389 28.5461   1
  -5 -21   2 92.7370 24.7966   4
   5  21  -2 32.3774 20.8081   2
  -5  21   2 65.3197 23.5483   2
  -5  21   2 32.2502 20.1649   1
  -4 -21   2 -20.074 19.4568   1
  -4 -21   2 0.31094 19.7012   4
   4 -21  -2 -5.1991 23.8031   1
  -4  21   2 -5.2585 17.7621   1
   4  21  -2 2.24816 18.3308   2
  -4  21   2 3.84036 20.4502   2
   3 -21  -2 75.1361 25.7560   1
  -3 -21   2 38.6917 20.1935   1
  -3 -21   2 81.4063 22.1147   4
   3  21  -2 59.0874 20.2816   2
  -3  21   2 18.2118 19.4315   2
  -2 -21   2 10.0968 19.2383   4
  -2 -21   2 -29.491 17.7803   1
   2 -21  -2 20.2618 23.6949   1
  -2  21   2 12.5630 17.9255   2
   2  21  -2 3.62383 17.4819   2
  -2  21   2 -3.1446 15.2001   1
  -1 -21   2 72.7625 21.6538   4
   1 -21  -2 152.318 27.5509   1
  -1 -21   2 124.665 23.6619   1
   1  21  -2 104.799 21.8809   2
  -1  21   2 69.8846 21.7563   2
   0 -21   2 -27.590 18.4466   1
   0 -21   2 39.0379 19.7039   4
   0 -21  -2 37.9069 21.8202   1
   0  21   2 -19.959 17.8024   2
   0  21  -2 35.6777 17.9582   2
   1 -21   2 70.8387 23.3886   1
   1 -21   2 64.0964 20.5097   4
  -1 -21  -2 55.7764 22.8025   1
  -1  21  -2 88.3035 21.2829   2
  -1  21  -2 94.5579 18.0042   1
   1  21   2 80.6085 21.7835   2
   2 -21   2 -35.698 20.2798   1
   2 -21   2 16.2617 20.1225   4
  -2 -21  -2 32.7229 21.5284   1
   2  21   2 8.14053 18.7999   2
  -2  21  -2 -6.7229 18.8888   2
  -2  21  -2 12.9119 17.3871   1
   3 -21   2 51.3647 23.2953   1
   3 -21   2 30.2302 20.9328   4
  -3 -21  -2 122.698 38.2230   1
  -3  21  -2 65.1615 21.5582   2
   3  21   2 59.9408 22.0416   2
  -3  21  -2 67.2941 20.2826   1
  -4 -21  -2 14.7955 26.2053   1
   4 -21   2 12.5304 22.1563   4
   4 -21   2 18.2352 24.2172   1
   4  21   2 -12.776 19.9514   2
  -4  21  -2 11.1803 21.5841   2
  -4  21  -2 5.70249 19.0325   1
  -5 -21  -2 -32.652 21.9880   4
   5 -21   2 -22.313 27.8917   1
   5 -21   2 -3.3560 21.6752   4
  -5  21  -2 25.5345 22.7431   1
  -5  21  -2 -28.496 21.4429   2
   5  21   2 21.6179 22.4887   2
   5 -22  -2 70.2729 34.7183   1
  -5 -22   2 37.4738 26.8909   4
   5  22  -2 13.8902 26.4215   2
  -5  22   2 84.2165 27.8116   2
  -5  22   2 12.6660 22.4865   1
  -4 -22   2 65.0093 24.9176   4
   4 -22  -2 18.9198 28.0404   1
  -4 -22   2 -45.317 21.3215   1
   4  22  -2 31.3925 22.5935   2
  -4  22   2 0.32274 20.5403   1
  -4  22   2 -6.2113 24.4565   2
  -3 -22   2 6.68718 22.8778   1
  -3 -22   2 1.79347 22.9007   4
   3 -22  -2 1.90788 26.4693   1
  -3  22   2 15.9001 25.9635   1
  -3  22   2 4.95260 22.4640   2
   3  22  -2 -22.578 19.8304   2
   2 -22  -2 97.4909 27.9642   1
  -2 -22   2 -5.2407 21.5379   1
  -2 -22   2 39.1597 22.1316   4
   2  22  -2 25.3598 20.6022   2
  -2  22   2 58.0830 23.0531   2
  -1 -22   2 12.2322 21.8766   1
  -1 -22   2 36.3502 21.3968   4
   1 -22  -2 35.8258 24.9298   1
  -1  22   2 -16.324 20.1610   2
   1  22  -2 27.1333 21.2285   2
   0 -22   2 104.068 25.3763   1
   0 -22   2 64.8376 22.8781   4
   0 -22  -2 116.242 27.9242   1
   0  22  -2 85.9576 23.0818   2
   0  22   2 86.5878 24.3713   2
   1 -22   2 -27.182 23.1012   1
   1 -22   2 -28.824 20.8898   4
  -1 -22  -2 0.13859 24.1437   1
   1  22   2 -8.0964 20.8224   2
  -1  22  -2 17.0110 20.9566   2
   2 -22   2 8.23701 25.0543   1
  -2 -22  -2 46.9738 25.9192   1
   2 -22   2 23.5151 23.1575   4
  -2  22  -2 55.9150 24.1631   2
   2  22   2 32.1865 22.7940   2
  -2  22  -2 44.0566 19.7372   1
   3 -22   2 -8.8920 22.9127   4
  -3 -22  -2 6.72607 24.9041   1
   3 -22   2 50.5820 29.1622   1
   3  22   2 34.4593 23.0692   2
  -3  22  -2 -29.494 20.0835   1
  -3  22  -2 2.10445 21.6307   2
   4 -22   2 49.2046 25.0133   4
  -4 -22  -2 17.1062 25.6693   4
  -4  22  -2 -2.8862 22.7609   2
   4  22   2 -44.254 23.5311   2
  -2 -23   2 8.30537 25.6692   1
   2 -23  -2 7.09553 29.5958   1
  -2 -23   2 56.3789 28.9592   4
  -2  23   2 78.2987 34.4043   2
   2  23  -2 29.8183 29.4958   2
   1 -23  -2 38.5582 30.9146   1
  -1 -23   2 68.8902 29.6618   4
  -1 -23   2 34.3711 27.1001   1
  -1  23   2 50.5168 28.0047   2
   1  23  -2 0.92219 26.3049   2
   0 -23  -2 42.2211 28.2845   1
   0 -23   2 34.1004 27.5422   4
   0 -23   2 27.9858 26.9494   1
   0  23  -2 21.8900 24.4727   2
   0  23   2 26.0754 27.7600   2
   1 -23   2 7.41637 27.5211   1
   1 -23   2 15.0297 27.2625   4
  -1 -23  -2 51.0285 36.0004   1
  -1  23  -2 -10.983 24.6570   2
   1  23   2 -1.7913 30.7659   2
 -15   0   3 156.460 36.6397   1
 -15   0   3 111.297 30.1241   3
 -14   0   3 33.2465 21.4275   3
 -13   0   3 83.2683 20.7415   3
 -13   0   3 116.601 18.1528   1
 -12   0   3 74.4366 19.5709   3
 -12   0   3 101.621 20.1777   1
 -12   0   3 98.1830 15.5668   1
 -11   0   3 95.8884 18.1439   3
 -11   0   3 71.0547 15.3830   1
 -11   0   3 60.9568 12.4498   1
 -11   0   3 67.0883 9.39703   4
 -10   0   3 -2.1236 7.68443   1
 -10   0   3 27.8113 10.2900   1
 -10   0   3 3.96565 4.95821   4
  -9   0   3 154.273 15.0836   1
  -9   0   3 166.431 12.1285   4
   9   0  -3 145.370 12.8214   4
  -9   0   3 168.787 17.1036   1
   8   0  -3 206.677 13.1679   1
   8   0  -3 215.000 15.8671   1
  -8   0   3 204.427 17.3187   1
   8   0  -3 192.638 14.6620   4
  -8   0   3 217.505 16.2067   1
  -8   0   3 223.717 14.2668   4
   7   0  -3 324.402 18.9303   1
  -7   0   3 342.655 19.5808   4
   7   0  -3 319.798 19.9253   1
  -7   0   3 340.636 20.7736   1
   7   0  -3 298.520 19.7131   4
   6   0  -3 1145.35 60.9370   1
  -6   0   3 1111.91 62.7540   1
   6   0  -3 1167.23 61.9130   1
   6   0  -3 1131.62 61.5175   4
  -6   0   3 1199.22 62.1156   1
  -6   0   3 1207.81 61.4333   4
  -5   0   3 27.6334 4.38617   4
   5   0  -3 25.3802 4.08699   1
   5   0  -3 25.6859 5.42724   1
  -5   0   3 29.2439 5.14603   1
  -5   0   3 30.2797 5.39921   1
   5   0  -3 29.9218 4.83094   4
  -4   0   3 303.489 16.5005   4
   4   0  -3 259.294 16.6426   1
  -4   0   3 259.771 17.1569   1
  -4   0   3 283.251 16.6496   1
   4   0  -3 278.220 16.4823   4
  -3   0   3 2355.15 116.995   4
   3   0  -3 2160.21 116.817   1
  -3   0   3 2028.94 116.731   1
   3   0  -3 2311.48 116.101   4
  -3   0   3 2321.61 116.722   1
   3   0  -3 2323.94 115.877   1
   2   0  -3 9624.75 496.023   1
  -2   0   3 9460.27 495.448   4
   2   0  -3 9912.61 495.445   1
  -2   0   3 9999.99 496.013   1
  -2   0   3 9613.87 495.487   1
   2   0  -3 9856.11 495.536   4
  -1   0   3 555.668 30.7641   4
   1   0  -3 551.936 30.6422   1
   1   0  -3 551.075 30.7301   3
   1   0  -3 563.672 30.1360   4
  -1   0   3 582.771 30.7303   3
  -1   0   3 574.571 30.3223   1
   1   0  -3 557.085 30.1962   1
  -1   0   3 559.055 30.5497   1
   0   0  -3 1257.47 68.3838   3
   0   0   3 1367.50 68.5462   3
   0   0  -3 1257.08 68.2887   1
   0   0  -3 1333.61 68.0718   1
   0   0   3 1312.56 68.2952   1
   0   0   3 1326.90 67.7239   4
   0   0  -3 1362.12 67.7615   4
   0   0   3 1251.81 67.9659   1
  -1   0  -3 72.1797 6.29861   3
   1   0   3 64.8581 6.02216   3
  -1   0  -3 61.2868 5.80421   1
   1   0   3 65.4233 5.24250   1
  -1   0  -3 68.8011 4.76845   4
   1   0   3 64.4229 5.60803   1
  -1   0  -3 60.8911 5.27325   1
   1   0   3 63.6548 4.76514   4
  -2   0  -3 377.033 20.7964   1
  -2   0  -3 346.374 18.7296   2
  -2   0  -3 377.159 19.5960   4
  -2   0  -3 387.010 21.8101   3
   2   0   3 353.168 20.7743   1
   2   0   3 349.563 21.6412   3
   2   0   3 355.238 19.5651   4
  -2   0  -3 366.971 22.2652   1
  -3   0  -3 36.4948 6.19053   3
   3   0   3 30.9514 6.14517   3
   3   0   3 46.5756 5.51014   1
  -3   0  -3 41.0423 5.35541   1
  -3   0  -3 45.3461 3.52080   2
  -3   0  -3 43.1043 5.94854   1
  -3   0  -3 40.0893 3.30035   4
   4   0   3 17.9738 6.07777   3
  -4   0  -3 15.9173 3.97350   1
  -4   0  -3 10.8783 1.31327   4
  -4   0  -3 13.6414 5.51897   3
  -4   0  -3 11.4242 2.58876   2
  -4   0  -3 11.0428 4.05169   1
   4   0   3 17.4332 3.93221   1
   5   0   3 46.2880 6.17406   1
  -5   0  -3 42.4171 8.34351   3
   5   0   3 52.1759 6.06595   1
  -5   0  -3 53.6830 5.67384   2
  -5   0  -3 48.6673 9.85571   1
  -5   0  -3 48.3296 7.37350   1
   5   0   3 38.4616 8.53421   3
  -6   0  -3 1334.90 69.0570   1
   6   0   3 1136.92 71.1698   3
  -6   0  -3 1295.45 67.3053   2
  -6   0  -3 1223.14 68.8943   1
  -6   0  -3 1379.75 71.4514   3
   6   0   3 1273.60 66.8133   1
  -7   0  -3 161.361 12.9222   2
   7   0   3 164.127 10.7231   1
   7   0   3 168.552 10.8766   1
  -7   0  -3 188.752 17.8231   3
  -7   0  -3 169.688 15.5963   1
  -7   0  -3 180.855 15.4538   1
  -8   0  -3 301.863 23.9919   3
  -8   0  -3 263.634 21.8095   1
  -8   0  -3 245.226 20.4806   1
  -9   0  -3 80.6463 14.3929   1
  -9   0  -3 133.617 18.6523   3
  -9   0  -3 93.4058 15.4711   1
  -9   0  -3 87.0232 13.1973   2
 -10   0  -3 4.77585 12.2178   3
 -10   0  -3 16.5060 15.1165   1
 -10   0  -3 2.76332 10.4472   1
 -10   0  -3 3.13613 9.18713   2
 -11   0  -3 61.4823 14.5692   1
 -11   0  -3 39.7220 16.4341   3
 -12   0  -3 17.1727 18.0164   3
 -13   0  -3 4.89179 19.7235   1
 -13   0  -3 -26.667 21.1613   3
 -15  -1   3 36.7774 27.5242   3
 -15  -1   3 47.9423 20.6971   1
 -15   1   3 17.2073 27.3848   3
 -15   1   3 28.7602 21.7166   1
 -14  -1   3 72.2663 20.1078   1
 -14  -1   3 121.148 25.3826   3
 -14   1   3 106.717 20.2705   1
 -14   1   3 73.1142 24.3478   3
 -13  -1   3 23.7762 17.8731   3
 -13  -1   3 37.4387 14.1727   1
 -13   1   3 24.8725 16.6113   3
 -13   1   3 53.9633 16.3413   1
 -12  -1   3 50.3887 17.4530   1
 -12  -1   3 98.2762 20.1353   3
  12  -1  -3 78.1104 13.3038   4
 -12  -1   3 102.014 15.8204   1
 -12  -1   3 108.947 10.9128   4
 -12   1   3 117.777 20.9243   3
 -12   1   3 104.192 17.1161   1
 -11  -1   3 21.9208 13.4049   3
 -11  -1   3 30.8224 10.0098   1
 -11  -1   3 14.7507 12.4414   1
 -11  -1   3 23.4455 6.27583   4
 -11   1   3 41.5030 14.9905   3
 -11   1   3 57.9003 14.6730   1
 -10  -1   3 61.3653 10.5861   1
 -10  -1   3 57.2415 8.58002   4
  10  -1  -3 41.8255 8.63122   4
 -10  -1   3 70.8183 12.8058   1
  10  -1  -3 46.2632 9.17337   1
  10  -1  -3 53.9731 7.31441   1
 -10   1   3 65.1694 8.42283   4
[truncated: 3,266,407 more chars]
